# Supplementary material for: DNA Methylation as a Marker of Body Shape in Premenopausal Women
Source: Front Genet. 2021 Jul 29;12:709342. doi: 10.3389/fgene.2021.709342 (PMC8358448; doi:10.3389/fgene.2021.709342)
Supplement: Supplementary Table 1 — List of differentially methylated sites between 10 Apple and 7 Pear-shaped women in A-FAT, GF-FAT, A-preadipocytes and GF-preadipocytes. Anova, p-value < 0.05, (Apple β-value)-(Pear β-value) ≥ 0.2. [file Table_1.XLSX]

## Sheet: Apple vs Pear in ABD AT
Column #	Column ID	CHR	MAPINFO	Strand	UCSC_RefGene_Name.0	UCSC_RefGene_Group.0	Relation_to_UCSC_CpG_Island	Regulatory_Feature_Group	SNP_DISTANCE.0	p-value(Shape)	p-value(apple vs. pear)	MeanRatio(apple vs. pear)	FoldChange(apple vs. pear)	FoldChange(apple vs. pear) (Description)	Estimate(apple vs. pear)	F(Shape)	SS(Shape)	SS(Error)	F(Error)	201800232-01 (Intensity)	201800233-01 (Intensity)	201800234-01 (Intensity)	201800235-01 (Intensity)	201800236-01 (Intensity)	201800237-01 (Intensity)	201800238-01 (Intensity)	201800239-01 (Intensity)	201800240-01 (Intensity)	201800241-01 (Intensity)	201800242-01 (Intensity)	201800243-01 (Intensity)	201800244-01 (Intensity)	201800245-01 (Intensity)	201800246-01 (Intensity)	201800247-01 (Intensity)	201800248-01 (Intensity)
350781	cg10423996	3	194762035	R					1	1.09429e-05	1.09429e-05	3.54988	3.54988	apple up vs pear	0.475773	41.6023	0.93207	0.336064	1	0.0481625	0.484914	0.781532	0.748527	0.440583	0.00557797	0.0998827	0.528636	0.686527	0.651564	0.633512	0.141337	0.783953	0.652685	0.716071	0.0816327	0.444596
425339	cg12795959	20	1569403	F	SIRPB1	Body				6.31468e-05	6.31468e-05	4.38725	4.38725	apple up vs pear	0.301264	30.0526	0.373719	0.186532	1	0.0630876	0.0376068	0.472147	0.221465	0.471583	0.11019	0.134323	0.181058	0.368229	0.457143	0.558188	0	0.451713	0.459856	0.260671	0.0298097	0.247569
377898	cg11281224	4	60001000	F					3	6.45094e-05	6.45094e-05	0.68046	-1.46959	apple down vs pear	-0.259059	29.928	0.276341	0.138503	1	0.857228	0.876714	0.609904	0.412529	0.400343	0.590998	0.849221	0.600033	0.622666	0.601102	0.442485	0.85632	0.637499	0.620988	0.569107	0.824052	0.820538
309199	cg09145734	10	116367729	F	ABLIM1	Body			0	8.12129e-05	8.12129e-05	0.625244	-1.59938	apple down vs pear	-0.21747	28.6071	0.194737	0.10211	1	0.629996	0.549431	0.333425	0.299129	0.399942	0.55437	0.505581	0.225255	0.428002	0.454138	0.47895	0.552033	0.29968	0.43611	0.273647	0.727446	0.543228
442237	cg13342259	17	39073015	R					1	0.00016161	0.00016161	2.86287	2.86287	apple up vs pear	0.371305	24.8956	0.567688	0.342041	1	0.0489603	0.50829	0.481816	0.491011	0.68174	0.0866062	0.152819	0.485828	0.476495	0.474842	0.473936	0.429201	0.765041	0.701582	0.673947	0.0446506	0.124707
195444	cg05715076	14	100075957	R				Unclassified	45	0.000186659	0.000186659	1.66197	1.66197	apple up vs pear	0.24853	24.1612	0.254335	0.157899	1	0.641414	0.216352	0.60583	0.561178	0.718342	0.408558	0.430191	0.629893	0.61923	0.66861	0.60768	0.448251	0.623591	0.591248	0.614128	0.241935	0.241399
756994	cg23958373	8	599963	F			Island		33	0.00025013	0.00025013	1.41881	1.41881	apple up vs pear	0.242336	22.7128	0.241816	0.1597	1	0.559573	0.577286	0.569062	0.868419	0.846169	0.778397	0.547342	0.888771	0.893072	0.8505	0.892117	0.522299	0.686785	0.879631	0.835185	0.472161	0.593388
865894	rs9839873									0.00025356	0.00025356	2.13054	2.13054	apple up vs pear	0.459488	22.6468	0.869354	0.575812	1	0.58991	0.0170794	0.933725	0.802117	0.897724	0.523535	0.508852	0.824283	0.948498	0.869208	0.937384	0.570524	0.570633	0.960819	0.914795	0	0.635117
403054	cg12074150	2	34128722	R					42	0.000375739	0.000375739	0.263183	-3.79963	apple down vs pear	-0.52522	20.7926	1.13588	0.819435	1	0.529169	0.876481	0.0612783	0.608325	0.15465	0.166125	0.751811	0.163833	0.0864671	0.0544741	0.511738	0.900491	0.0609262	0.112021	0.0623214	0.897052	0.868635
78664	cg02266339	3	194121181	R	GP5	TSS1500	S_Shelf		19	0.000400826	0.000400826	2.30372	2.30372	apple up vs pear	0.338595	20.4972	0.472075	0.345467	1	0.632365	0.101845	0.615533	0.643442	0.486528	0.433817	0	0.610853	0.584687	0.590638	0.653574	0.305977	0.65133	0.557746	0.588779	0.319573	0.0244324
391511	cg11716267	2	24367828	F	LOC375190	Body			0	0.000599798	0.000599798	0.380275	-2.62968	apple down vs pear	-0.356874	18.713	0.524419	0.420364	1	0.511711	0.531306	0.0708444	0.0959686	0.185789	0.484877	0.506075	0.476449	0.474605	0.0989121	0.515557	0.757481	0.0876039	0.107453	0.0766589	0.764918	0.474636
559354	cg16908938	2	11728079	R	GREB1	3'UTR			20	0.00067534	0.00067534	0.680796	-1.46887	apple down vs pear	-0.2546	18.2064	0.26691	0.219904	1	0.849567	0.825382	0.519917	0.508639	0.459265	0.816579	0.763996	0.495799	0.511765	0.783513	0.428579	0.764363	0.828669	0.56965	0.324278	0.769293	0.794071
812498	cg25936818	10	126630735	R	ZRANB1	1stExon			33	0.000689538	0.000689538	1.69167	1.69167	apple up vs pear	0.2893	18.1184	0.344624	0.28531	1	0.657446	0.593939	0.749778	0.699397	0.754449	0.50654	0.482855	0.772931	0.779416	0.778953	0.686258	0.145637	0.667895	0.694465	0.492076	0.280505	0.260912
822568	cg26287822	X	111621927	F	ZCCHC16	5'UTR	N_Shore		0	0.00071106	0.00071106	2.54887	2.54887	apple up vs pear	0.450243	17.9888	0.834726	0.696037	1	0.480447	0.0508607	0.819968	0.804212	0.962258	0.73621	0.493243	0.693381	0.760817	0.510245	0.418989	0.03673	0.842053	0.77083	0.826594	0.086216	0.151131
174873	cg05096415	10	85985331	F	LRIT2	TSS200			0	0.000765838	0.000765838	2.3932	2.3932	apple up vs pear	0.362614	17.6782	0.541424	0.4594	1	0.442239	0.0338524	0.666413	0.509867	0.684142	0.650764	0.092987	0.614313	0.762522	0.451126	0.562554	0.14167	0.671624	0.654655	0.651664	0.00290119	0.457505
519904	cg15677188	11	134543316	F					8	0.000773227	0.000773227	0.686301	-1.45709	apple down vs pear	-0.230235	17.6383	0.218268	0.18562	1	0.769641	0.763663	0.698519	0.526646	0.371947	0.875888	0.748194	0.34367	0.369876	0.561175	0.496368	0.538047	0.633322	0.563598	0.471881	0.733017	0.709093
782715	cg24859648	20	17680544	F	BANF2	TSS200			0	0.000921453	0.000921453	0.341457	-2.92863	apple down vs pear	-0.302861	16.9176	0.377689	0.334878	1	0.375256	0.648988	0.041683	0.375632	0.068178	0.402622	0.36854	0.059417	0.123007	0.384089	0.42225	0.423972	0.0303721	0.0532819	0.0124317	0.384724	0.61516
639989	cg19707454	7	6616677	F	ZDHHC4	TSS1500	N_Shore		4	0.000983369	0.000983369	1.8556	1.8556	apple up vs pear	0.237357	16.6548	0.231981	0.208932	1	0.33283	0.276987	0.464067	0.356043	0.573638	0.19222	0.187697	0.357194	0.54121	0.524081	0.349185	0.381005	0.559783	0.62131	0.801207	0.285179	0.285987
3106	cg00083721	4	21452852	R	KCNIP4	Body			44	0.00103584	0.00103584	0.549815	-1.81879	apple down vs pear	-0.23646	16.4464	0.230231	0.209983	1	0.433183	0.3492	0.332943	0.171817	0.306427	0.493155	0.467016	0.123417	0.13081	0.359507	0.241486	0.621325	0.363688	0.416493	0.441316	0.626669	0.686203
402081	cg12045035	15	37494029	F					0	0.00117913	0.00117913	1.90562	1.90562	apple up vs pear	0.383939	15.9334	0.606978	0.571419	1	0.861165	0.00052281	0.878452	0.870744	0.617968	0.4238	0.675579	0.778934	0.905739	0.721794	0.775599	0.258254	0.849739	0.889672	0.790241	0.246449	0.501876
79223	cg02282391	21	47786494	R	PCNT	ExonBnd			47	0.00121087	0.00121087	0.446905	-2.23761	apple down vs pear	-0.408462	15.8294	0.686994	0.650998	1	0.785276	0.836121	0.221461	0.73013	0.670502	0.622858	0.703347	0	0.183658	0.697602	0.196916	0.733768	0.190739	0.173643	0.235754	0.765031	0.723119
677511	cg21070081	5	110105162	R					50	0.00137415	0.00137415	0.398008	-2.51252	apple down vs pear	-0.275978	15.3391	0.313616	0.306683	1	0.348828	0.524814	0.0350908	0.315402	0.0972245	0.367988	0.357659	0	0.334962	0.0393629	0	0.564408	0.285028	0.253298	0.464263	0.506684	0.53871
246429	cg07234876	8	600039	F			Island		25	0.00144155	0.00144155	1.43605	1.43605	apple up vs pear	0.2588	15.1558	0.27579	0.272955	1	0.549521	0.568596	0.566377	0.95249	0.888392	0.928904	0.539545	0.910837	0.887453	0.912516	0.875622	0.518094	0.706929	0.8715	0.951029	0.466911	0.583031
834821	cg26705599	13	111745598	R			Island		9	0.0015872	0.0015872	0.504129	-1.98362	apple down vs pear	-0.403734	14.7908	0.67118	0.680671	1	0.831017	0.834701	0.0379255	0.467731	0.509168	0.826881	0.807043	0.0815198	0.801041	0.792344	0.437669	0.807531	0.437858	0.0722674	0.467055	0.767876	0.82429
455221	cg13713155	4	3522139	R	LRPAP1	Body	S_Shore		44	0.00171134	0.00171134	0.49076	-2.03766	apple down vs pear	-0.230089	14.5087	0.217992	0.225374	1	0.353464	0.415813	0.359704	0	0.220083	0.535835	0.566401	0.345026	0	0.189981	0.235142	0.277497	0.289389	0.279725	0.298339	0.4355	0.578286
39968	cg01128039	20	1584666	R	SIRPB1	Body				0.00171986	0.00171986	3.50932	3.50932	apple up vs pear	0.26078	14.4902	0.280025	0.289877	1	0.0757428	0.0397659	0.486397	0.0948929	0.427221	0.108738	0.0911401	0.15429	0.471618	0.469332	0.489834	0.078566	0.442834	0.515839	0.0947851	0.184263	0.149256
183681	cg05355592	3	61594983	R	PTPRG	Body			3	0.00193345	0.00193345	2.0094	2.0094	apple up vs pear	0.429778	14.0578	0.760568	0.811545	1	0.847681	0.51104	0.883622	0.807638	0.838954	0.881246	0.540869	0.853251	0.875162	0.816871	0.851716	0.0525832	0.867248	0.862356	0.898727	0	0.147016
559029	cg16899969	3	143686617	R			N_Shelf		35	0.00219852	0.00219852	2.19205	2.19205	apple up vs pear	0.424251	13.5912	0.741132	0.817956	1	0.7732	0.0764462	0.790743	0.799599	0.814074	0.710445	0.734019	0.7656	0.686316	0.779931	0.795364	0	0.796811	0.84687	0.726208	0	0.197192
836287	cg26757229	11	102191336	R	BIRC3	5'UTR	S_Shelf		44	0.00225093	0.00225093	0.585813	-1.70703	apple down vs pear	-0.355711	13.5065	0.521007	0.578618	1	0.874166	0.89721	0.857841	0.62758	0.417745	0.841606	0.901447	0.430981	0.078545	0.627546	0.127285	0.811658	0.538407	0.542772	0.782357	0.827654	0.857978
355458	cg10565256	3	123681688	R	CCDC14	TSS1500	S_Shore		25	0.00227627	0.00227627	1.9103	1.9103	apple up vs pear	0.232541	13.4664	0.222664	0.248021	1	0.177218	0.311105	0.257854	0.683216	0.490813	0.252691	0.39251	0.524151	0.553378	0.560778	0.341654	0.0945077	0.346249	0.430323	0.69154	0.231764	0.328385
294379	cg08693140	7	6653510	F			N_Shore		0	0.00231797	0.00231797	1.88864	1.88864	apple up vs pear	0.287288	13.4015	0.339849	0.380386	1	0.70388	0.406975	0.683788	0.683525	0.603136	0.128337	0.122202	0.671065	0.645608	0.421916	0.437503	0.0993848	0.658262	0.639464	0.661525	0.423102	0.379155
157263	cg04576441	Y	15866837	R			S_Shelf			0.00235866	0.00235866	0.19044	-5.25101	apple down vs pear	-0.391483	13.7195	0.574721	0.586472	1	0.244141	?	0	0	0.202845	0.686046	0.0285033	0.0031721	0.12644	0.310666	0.00254692	0.657042	0	0.275247	0	0.476107	0.809608
605552	cg18455878	12	48257326	F	VDR	Body			0	0.00250508	0.00250508	0.43554	-2.296	apple down vs pear	-0.398062	13.1256	0.652453	0.745627	1	0.814779	0.808157	0.795792	0.463248	0.405391	0.455058	0.80119	0.416169	0.0731303	0.0476807	0.0353059	0.776315	0.406075	0.410527	0.0181438	0.803478	0.477477
93897	cg02706652	16	23718262	F	ERN2	Body			0	0.00253309	0.00253309	1.74549	1.74549	apple up vs pear	0.297293	13.0863	0.363932	0.41715	1	0.427216	0.0508952	0.718682	0.690566	0.644872	0.725094	0.44782	0.703564	0.737135	0.694037	0.713434	0.427627	0.695676	0.72611	0.636734	0.0628499	0.65001
206898	cg06060457	22	43157042	R					9	0.00258975	0.00258975	0.504954	-1.98038	apple down vs pear	-0.302654	13.0084	0.377174	0.434919	1	0.452309	0.437799	0.419501	0.069694	0.63572	0.626165	0.697913	0.0842389	0.435781	0.111773	0.106999	0.675346	0.427305	0.403752	0.392354	0.720102	0.669925
57748	cg01648869	17	55689899	R	MSI2	Body			9	0.00289997	0.00289997	0.489586	-2.04254	apple down vs pear	-0.436789	12.6135	0.785583	0.934214	1	0.893768	0.908682	0.0653124	0.644731	0.339873	0.837891	0.792249	0.700747	0.068234	0.207504	0.40352	0.78688	0.872336	0.0677511	0.81964	0.888116	0.882689
189469	cg05531409	3	131637172	R	CPNE4	5'UTR			19	0.00295397	0.00295397	0.634277	-1.5766	apple down vs pear	-0.307793	12.5497	0.390091	0.466254	1	0.857078	0.847056	0.518041	0.278465	0.118849	0.811235	0.87805	0.34067	0.671412	0.569374	0.727097	0.854222	0.857058	0.689328	0.56778	0.806691	0.836868
389832	cg11663691	4	119759900	F			S_Shelf		0	0.00308909	0.00308909	2.98527	2.98527	apple up vs pear	0.332187	12.3958	0.454375	0.549835	1	0.518537	0.0567184	0.459688	0.59528	0.534431	0.097812	0	0.0925949	0.351254	0.524873	0.394549	0.172883	0.513423	0.661431	0.867602	0.226879	0.0984493
445642	cg13443681	3	177920207	R					47	0.00316927	0.00316927	3.37211	3.37211	apple up vs pear	0.266391	12.308	0.292205	0.356116	1	0.0509084	0.0658876	0.0632676	0.233033	0.548188	0.162049	0	0.289244	0.53681	0.243624	0.381968	0.0793485	0.465141	0.698063	0.327581	0.230906	0.19701
552962	cg16702660	14	22361282	F					0	0.0031846	0.0031846	2.17946	2.17946	apple up vs pear	0.283889	12.2915	0.331854	0.404981	1	0.0627655	0.0614798	0.443042	0.439672	0.403415	0.111198	0.466942	0.717754	0.76854	0.457521	0.438215	0.443379	0.465646	0.427458	0.684576	0.104217	0.434879
332546	cg09863391	17	65293896	R					49	0.00320462	0.00320462	0.575485	-1.73766	apple down vs pear	-0.276073	12.2701	0.313832	0.383656	1	0.444928	0.71756	0.377869	0.502299	0	0.704299	0.677582	0.430757	0.451102	0.661385	0.385734	0.700867	0.400318	0.095775	0.43729	0.66701	0.640037
90431	cg02606988	Y	9216456	F	TSPY4	Body	S_Shore			0.00321743	0.00321743	0.320935	-3.11589	apple down vs pear	-0.25426	12.2565	0.266199	0.325785	1	0.331851	0.145712	0.177962	0.131053	0	0.48264	0.269489	0.262182	0	0.122857	0	0.467278	0.446788	0.0608258	0	0.591199	0.332821
769298	cg24395890	1	24151885	F	HMGCL	1stExon		Promoter_Associated	5	0.00345894	0.00345894	5.2152	5.2152	apple up vs pear	0.30806	12.0107	0.39077	0.488025	1	0.029392	0.0761088	0.0845976	0.412945	0.443303	0.395458	0	0.166706	0.297906	0.60717	0.444526	0	0.14375	0.557267	0.653264	0	0.0106237
223517	cg06573884	7	149189636	R	ZNF746	Body			47	0.00364874	0.00364874	0.674018	-1.48364	apple down vs pear	-0.25008	11.831	0.257518	0.326495	1	0.810413	0.832244	0.857448	0.495407	0.439777	0.774229	0.785462	0.596167	0.16143	0.596758	0.409931	0.859754	0.586665	0.577014	0.450188	0.649237	0.658771
268777	cg07912251	12	107712194	R	BTBD11	TSS200	Island	Promoter_Associated		0.00375609	0.00375609	2.83018	2.83018	apple up vs pear	0.34254	11.734	0.483139	0.617615	1	0.367796	0.252725	0.35514	0.282046	0.770239	0.0792875	0.373155	0.515881	0.855525	0.159384	0.658024	0	0.392961	0.616965	0.690848	0	0.237168
548094	cg16556401	3	192611032	R	MB21D2	Body		Unclassified	1	0.00409894	0.00409894	0.674404	-1.48279	apple down vs pear	-0.219442	11.4442	0.198284	0.259894	1	0.60189	0.614122	0.386504	0.398507	0.476245	0.407493	0.621776	0.440907	0.398057	0.436918	0.436695	0.624766	0.488084	0.643957	0.439401	0.906798	0.940942
195083	cg05704942	1	19581542	R	MRTO4	Body	S_Shelf		1	0.00410101	0.00410101	0.468336	-2.13522	apple down vs pear	-0.351871	11.4425	0.509818	0.668323	1	0.748832	0.751786	0.709398	0.453283	0.44235	0.475526	0.771208	0.424697	0.468371	0.0870765	0.0559174	0.705163	0.430899	0	0.0275971	0.753411	0.426881
838561	cg26835411	4	40208282	F	RHOH	5'UTR			34	0.00410993	0.00410993	0.501019	-1.99593	apple down vs pear	-0.22939	11.4353	0.21667	0.284211	1	0.280872	0.275227	0.279972	0.268701	0.121364	0.666183	0.716576	0.138538	0.346654	0.306674	0.134936	0.270726	0.262906	0.135508	0.308011	0.480512	0.52792
464789	cg13989295	17	57187728	R	SKA2	3'UTR	S_Shelf		1	0.00422395	0.00422395	4.04655	4.04655	apple up vs pear	0.32259	11.3453	0.428501	0.566535	1	0.0527575	0.0469608	0.0431124	0.495064	0.515962	0.45674	0.0240013	0.103028	0.464963	0.632378	0.341112	0.0691851	0.472332	0.471791	0.74503	0.0658962	0.0256673
490847	cg14737079	22	21309949	R	LOC101928891	TSS1500	N_Shore		51	0.00425498	0.00425498	0.400148	-2.49908	apple down vs pear	-0.461802	11.3213	0.878133	1.16347	1	0.870947	0.878476	0.18312	0.88448	0.308519	0.740994	0.416187	0.174307	0	0	0.521919	0.818123	0.844945	0	0.163281	0.83691	0.827376
447881	cg13506281	13	29914200	R	MTUS2	Body	Island		25	0.00429835	0.00429835	1.79958	1.79958	apple up vs pear	0.339131	11.288	0.473569	0.629298	1	0.863669	0.418354	0.853643	0.440554	0.807517	0.482369	0.413217	0.791503	0.822284	0.860123	0.866965	0.402333	0.422318	0.918624	0.849144	0.336265	0.0527499
274420	cg08084984	16	17482912	F	XYLT1	Body			0	0.00442963	0.00442963	6.31275	6.31275	apple up vs pear	0.376004	11.1897	0.58215	0.780382	1	0.039025	0.0478988	0.0385137	0.0589801	0.485361	0.065162	0.0995675	0.159546	0.423556	0.818455	0.766933	0.0184901	0.446523	0.47097	0.798945	0.0631125	0.162161
653923	cg20205188	10	1251771	R	ADARB2	Body	N_Shore		34	0.00444141	0.00444141	0.549735	-1.81906	apple down vs pear	-0.308389	11.181	0.391604	0.525359	1	0.699319	0.753097	0.407299	0.439543	0.396617	0.483316	0.675885	0.0975864	0.42269	0.691109	0.0810049	0.779712	0.70514	0.438533	0.0856432	0.668025	0.734985
88962	cg02564175	16	57333902	R				Promoter_Associated	49	0.00455395	0.00455395	2.796	2.796	apple up vs pear	0.25149	11.0996	0.26043	0.351944	1	0.0185843	0.0175315	0.454895	0.477061	0.399083	0.450368	0.0549868	0.18777	0.147337	0.509873	0.497551	0.0459367	0.475242	0.52672	0.239646	0.289414	0.103373
437292	cg13183651	17	39151857	F	KRTAP3-3	TSS1500			0	0.00462417	0.00462417	1.47137	1.47137	apple up vs pear	0.222456	11.0499	0.203768	0.27661	1	0.41824	0.427646	0.718483	0.657569	0.697978	0.707461	0.615015	0.658255	0.716178	0.701382	0.676157	0.653014	0.696167	0.727663	0.694091	0.0810417	0.401137
504676	cg15173629	X	84882562	F					8	0.00478485	0.00478485	0.695524	-1.43776	apple down vs pear	-0.205011	10.9395	0.173063	0.237301	1	0.671332	0.814428	0.364929	0.644865	0.414064	0.434487	0.535566	0.413463	0.405906	0.417179	0.465933	0.673979	0.695981	0.474647	0.386172	0.805429	0.778054
487384	cg14629612	21	38224537	R	HLCS	Body			2	0.00478731	0.00478731	1.6642	1.6642	apple up vs pear	0.326358	10.9378	0.438568	0.601446	1	0.140219	0.883905	0.88107	0.810213	0.892846	0.750855	0.27317	0.800826	0.764974	0.689225	0.83353	0.798993	0.884855	0.852926	0.76663	0.282589	0.309733
572591	cg17330030	22	26142061	R	MYO18B	5'UTR			33	0.00487936	0.00487936	2.15828	2.15828	apple up vs pear	0.296897	10.8765	0.362962	0.500568	1	0.55372	0	0.605702	0.722109	0.596248	0.0201921	0.540726	0.484579	0.328971	0.689412	0.44551	0.385497	0.61077	0.487603	0.561313	0	0.294138
281080	cg08281735	2	70418368	R	C2orf42	TSS1500	S_Shore	Promoter_Associated	51	0.00489433	0.00489433	0.289006	-3.46013	apple down vs pear	-0.247084	10.8666	0.251385	0.347005	1	0.0728378	0.304462	0.104584	0	0.112248	0.284894	0.240721	0	0.0842562	0.300529	0.130972	0.783437	0.0974886	0.0747666	0.0995086	0.353092	0.393193
526951	cg15897435	4	78852682	F	MRPL1	Body			0	0.00501228	0.00501228	3.79647	3.79647	apple up vs pear	0.252461	10.7902	0.262445	0.364838	1	0.0462603	0.025805	0.0454919	0.268387	0.412646	0.189183	0.135672	0.410989	0	0.393609	0.383404	0.0261495	0.41241	0.663279	0.437178	0.0853563	0.123522
313726	cg09281805	7	4751840	F	FOXK1	Body			0	0.00503467	0.00503467	2.11698	2.11698	apple up vs pear	0.30546	10.7759	0.3842	0.534803	1	0.0486192	0.0498009	0.700556	0.153447	0.725031	0.417367	0.43262	0.673979	0.48823	0.738285	0.416873	0.428254	0.731075	0.477448	0.68437	0.398284	0.139343
131522	cg03810198	17	74679597	F	MXRA7	Body		Unclassified_Cell_type_specific	0	0.0050477	0.0050477	0.225169	-4.44111	apple down vs pear	-0.331921	10.7676	0.453647	0.631959	1	0.442558	0.784971	0.0381324	0.0743127	0.0407801	0.0206154	0.121065	0.0860489	0.0201283	0.113239	0.468822	0.445769	0.0405524	0.0311297	0.0514293	0.471699	0.711971
159221	cg04636193	6	25506398	F	LRRC16A	Body			0	0.00508569	0.00508569	1.70227	1.70227	apple up vs pear	0.339877	10.7436	0.475657	0.6641	1	0.515122	0.0483618	0.874646	0.812732	0.838011	0.854134	0.798826	0.547758	0.866226	0.788295	0.886117	0.537102	0.879546	0.859307	0.885821	0.111632	0.522602
145942	cg04238896	22	37266319	F	NCF4	Body			1	0.0051055	0.0051055	0.559286	-1.78799	apple down vs pear	-0.345548	10.7312	0.49166	0.687238	1	0.78559	0.853358	0.828377	0.06233	0.405936	0.690697	0.813786	0.50741	0.266178	0.466578	0.808353	0.774603	0.535833	0.504168	0	0.791601	0.77881
401059	cg12012426	4	1366463	R	KIAA1530	Body	Island		38	0.00525748	0.00525748	2.40646	2.40646	apple up vs pear	0.394835	10.6377	0.641919	0.90516	1	0.21262	0.238451	0.872237	0.780552	0.849949	0.167489	0.118173	0.216424	0.88865	0.239254	0.837421	0.233415	0.87272	0.344452	0.853991	0.620057	0.374906
511443	cg15402732	5	640245	R	CEP72	Body	N_Shelf		43	0.00528135	0.00528135	1.38189	1.38189	apple up vs pear	0.231878	10.6232	0.221396	0.312611	1	0.871221	0.444153	0.85648	0.831492	0.858463	0.837219	0.83803	0.845545	0.849062	0.80669	0.858018	0.398582	0.848692	0.806816	0.829368	0.412137	0.448947
480994	cg14449263	4	166428088	F					0	0.00544618	0.00544618	2.05525	2.05525	apple up vs pear	0.344331	10.5257	0.488204	0.695732	1	0.748959	0.0262822	0.749551	0.510601	0.774081	0.441806	0.568121	0.811148	0.709186	0.776155	0.371209	0.0351483	0.787115	0.759628	0.457677	0.12877	0.335043
865882	rs715359									0.00551285	0.00551285	2.19321	2.19321	apple up vs pear	0.431766	10.4872	0.767618	1.09794	1	0.963574	0.0380369	0.951585	0.905375	0.950085	0.514733	0.462427	0.475654	0.481537	0.905496	0.945077	0.0880922	0.947859	0.479737	0.893779	0.407952	0.0581536
186790	cg05450204	18	66759844	F					0	0.00557264	0.00557264	1.38708	1.38708	apple up vs pear	0.2409	10.4531	0.238959	0.342901	1	0.893723	0.545563	0.866766	0.827416	0.873736	0.802877	0.477193	0.808279	0.903649	0.880214	0.939846	0.822626	0.872309	0.825309	0.835	0.584034	0.230447
361524	cg10759817	1	92101219	R	HSP90B3P	Body			50	0.0058876	0.0058876	0.690516	-1.44819	apple down vs pear	-0.2447	10.2803	0.246557	0.359753	1	0.789783	0.804233	0.412782	0.37296	0.794815	0.773461	0.767997	0.390446	0.751306	0.78987	0.412803	0.821795	0.385647	0.769589	0.37949	0.764316	0.81311
808833	cg25794455	5	149595582	F					0	0.00590553	0.00590553	1.59395	1.59395	apple up vs pear	0.284826	10.2707	0.334047	0.487862	1	0.446006	0.0941543	0.756981	0.735503	0.762287	0.737723	0.724771	0.762021	0.766251	0.754	0.771068	0.438074	0.778556	0.782879	0.77417	0.779823	0.136269
816146	cg26069044	11	124613956	R	NRGN	Body	N_Shore		50	0.0060386	0.0060386	1.76439	1.76439	apple up vs pear	0.28113	10.2011	0.325433	0.478527	1	0.0482047	0.533276	0.77497	0.437242	0.554324	0.493036	0.456375	0.506458	0.849246	0.778654	0.764952	0.445138	0.499399	0.482493	0.841378	0.122266	0.476178
404349	cg12114260	7	57080792	F			N_Shelf		23	0.00614668	0.00614668	2.03259	2.03259	apple up vs pear	0.227749	10.1458	0.213581	0.315768	1	0.266525	0.259979	0.378907	0.490954	0.431929	0.0529515	0.304491	0.774098	0.523206	0.500881	0.297186	0.21758	0.292455	0.345606	0.447892	0	0.442407
248817	cg07308158	2	97489870	F	CNNM3	Body			0	0.00618678	0.00618678	2.09597	2.09597	apple up vs pear	0.344658	10.1256	0.489132	0.724599	1	0.417199	0.0333611	0.748632	0.422329	0.732039	0.674435	0.748772	0.410796	0.771872	0.641895	0.592089	0.115127	0.684658	0.842916	0.744146	0.114446	0.0980138
663698	cg20566384	19	876604	F	MED16	Body	S_Shore		0	0.00621356	0.00621356	0.531086	-1.88293	apple down vs pear	-0.399494	10.1122	0.657157	0.974802	1	0.853315	0.864808	0.0467613	0.8784	0.834046	0.783552	0.87689	0.440729	0.480213	0	0.784664	0.850887	0.0577381	0.497869	0.504195	0.886058	0.848175
666952	cg20685672	2	181987552	R					1	0.00624025	0.00624025	1.60002	1.60002	apple up vs pear	0.286644	10.0988	0.338326	0.502522	1	0.561132	0.563786	0.913358	0.886764	0.843247	0.51379	0.558573	0.827726	0.577021	0.940447	0.641506	0.528219	0.895166	0.460841	0.657641	0.0162133	0.60238
299183	cg08839358	2	38528761	F	ATL2	Body			0	0.0066784	0.0066784	1.87636	1.87636	apple up vs pear	0.316517	9.88912	0.412519	0.625717	1	0.794426	0.0696725	0.774514	0.717909	0.447213	0.507579	0.547038	0.795878	0.760249	0.51586	0.768398	0.278834	0.508161	0.713103	0.775625	0	0.330665
365314	cg10879348	2	109251064	R	LIMS1	5'UTR			49	0.00684422	0.00684422	0.613393	-1.63028	apple down vs pear	-0.218906	9.81382	0.197317	0.301591	1	0.664049	0.651314	0.416586	0.424285	0.457071	0.575522	0.373316	0.0324926	0.396204	0.356482	0.457336	0.6058	0.399656	0.481501	0.0515698	0.531174	0.562397
533461	cg16104636	5	11851205	R	CTNND2	Body			28	0.00688432	0.00688432	0.734846	-1.36083	apple down vs pear	-0.225259	9.79592	0.208935	0.319932	1	0.869585	0.902539	0.4652	0.788207	0.445324	0.816938	0.815567	0.712708	0.828807	0.873256	0.456571	0.871581	0.456882	0.435025	0.780815	0.809798	0.860759
690005	cg21524061	4	38825551	R	TLR6	3'UTR			1	0.00712465	0.00712465	1.55669	1.55669	apple up vs pear	0.281973	9.69111	0.327389	0.506736	1	0.816064	0.475937	0.851849	0.849558	0.783021	0.818519	0.45989	0.805145	0.803955	0.464853	0.81894	0.462288	0.853268	0.831423	0.822871	0.0800121	0.432899
658242	cg20364183	3	115758614	F	LSAMP	Body			0	0.00712866	0.00712866	0.655288	-1.52605	apple down vs pear	-0.233764	9.6894	0.225011	0.348335	1	0.623944	0.70408	0.646065	0.298482	0.328076	0.636854	0.61913	0.089275	0.345253	0.650369	0.620736	0.714575	0.398086	0.409435	0.658009	0.72126	0.727152
145805	cg04234574	3	178986203	R	KCNMB3	TSS1500			41	0.0071547	0.0071547	1.63443	1.63443	apple up vs pear	0.259411	9.67829	0.277092	0.429454	1	0.696831	0.246559	0.697998	0.68663	0.689045	0.763392	0.462998	0.631225	0.641013	0.678137	0.667629	0.279858	0.685952	0.691878	0.613455	0.412562	0
454475	cg13691793	18	21750891	F	OSBPL1A	Body			8	0.00717434	0.00717434	0.579493	-1.72565	apple down vs pear	-0.33533	9.66995	0.463014	0.718227	1	0.798224	0.850189	0.0550179	0.662687	0.0179235	0.686322	0.837077	0.311112	0.813298	0.447082	0.348865	0.809117	0.716644	0.57694	0.671545	0.708135	0.893027
513487	cg15468755	Y	22925719	F	RPS4Y2	Body				0.0073634	0.0073634	0.28454	-3.51445	apple down vs pear	-0.295347	9.59092	0.359181	0.561751	1	0.217722	0	0.229793	0.21667	0	0.653526	0.531911	0	0.322884	0.251655	0	0.763203	0	0.153595	0	0.352147	0.371135
596576	cg18137779	1	56163457	R					47	0.00741996	0.00741996	0.70931	-1.40982	apple down vs pear	-0.247321	9.56773	0.251866	0.394869	1	0.870813	0.895087	0.855408	0.828446	0.508159	0.779041	0.92775	0.386453	0.864088	0.356296	0.786245	0.781306	0.468981	0.479928	0.500838	0.854796	0.846842
475453	cg14289956	6	35372052	R	PPARD	5'UTR			1	0.00748673	0.00748673	1.53922	1.53922	apple up vs pear	0.263121	9.54061	0.285075	0.448203	1	0.818826	0.499848	0.806123	0.496102	0.739836	0.719099	0.446166	0.785462	0.722415	0.769272	0.751716	0.440859	0.808949	0.773031	0.857983	0.442783	0.0481939
511542	cg15406319	17	40169518	R	DNAJC7	TSS1500	Island	Unclassified	11	0.00752103	0.00752103	3.94824	3.94824	apple up vs pear	0.202142	9.52678	0.168253	0.264916	1	0.118103	0.0120732	0.116536	0.500642	0.29982	0.0866524	0.182541	0.31692	0.360306	0.291791	0	0	0.135552	0.495452	0.190039	0.00161408	0.078962
865869	rs3936238									0.00758677	0.00758677	0.428625	-2.33304	apple down vs pear	-0.414655	9.50049	0.707983	1.11781	1	0.455615	0.940719	0.0413695	0.448441	0.119322	0.966353	0.472391	0.425912	0.936394	0.0752453	0.466719	0.453788	0.446964	0.0510986	0.09913	0.922953	0.868184
76915	cg02215595	9	80551002	F	GNAQ	Body			0	0.00779004	0.00779004	0.524095	-1.90805	apple down vs pear	-0.235661	9.42081	0.228677	0.364105	1	0.544226	0.374951	0.303313	0.0827508	0.28991	0.701906	0.237809	0.163732	0.225775	0.600022	0.0509003	0.589435	0.29379	0.196924	0.388114	0.467095	0.550864
301260	cg08896901	4	152996165	F					1	0.00797694	0.00797694	1.91345	1.91345	apple up vs pear	0.303248	9.34962	0.378656	0.607494	1	0.194634	0.169421	0.727702	0.49234	0.680915	0.0941816	0.758074	0.654839	0.712923	0.621368	0.732984	0.14812	0.281326	0.730162	0.71772	0.308897	0.650531
283139	cg08346443	7	68527554	F					0	0.00807878	0.00807878	1.69437	1.69437	apple up vs pear	0.330826	9.31163	0.450659	0.725962	1	0.880326	0.520612	0.885354	0.798988	0.731566	0.539758	0.889379	0.862583	0.794903	0.865158	0.68988	0.178643	0.845502	0.88405	0.71471	0	0.326386
725678	cg22849321	6	113128231	R					24	0.00822769	0.00822769	0.223615	-4.47197	apple down vs pear	-0.275609	9.25705	0.312778	0.506821	1	0.0579915	0.621359	0.00911117	0.13246	0.312502	0.221239	0.0708459	0.144415	0	0	0.110726	0.31674	0.053611	0.0309852	0	0.739573	0.457182
534712	cg16145187	17	53684393	R					48	0.00823082	0.00823082	2.23028	2.23028	apple up vs pear	0.326737	9.25592	0.439588	0.71239	1	0.0403726	0.0287478	0.663173	0.71757	0.464792	0.393559	0.419818	0.691131	0.725746	0.409717	0.695995	0.0499583	0.721123	0.773281	0.0606314	0.457101	0.469496
211272	cg06193597	2	241896910	R					4	0.00841928	0.00841928	0.354107	-2.824	apple down vs pear	-0.415771	9.18848	0.7118	1.162	1	0.901882	0.669101	0.887699	0.0487249	0.0545736	0.112051	0.808811	0.196531	0.194975	0.0715589	0.110107	0.65699	0.0605782	0.013896	0.640801	0.675021	0.682155
304182	cg08986950	5	96120312	F	ERAP1	Body			8	0.00842413	0.00842413	0.326356	-3.06414	apple down vs pear	-0.328239	9.18676	0.443639	0.724366	1	0.511838	0.834902	0.0336943	0.042692	0.156438	0.208917	0.482568	0.0352507	0	0.0461185	0.131955	0.767089	0.496498	0.119166	0.528385	0.154803	0.450695
561959	cg16995742	2	237992612	R	COPS8	TSS1500	N_Shore		14	0.00843357	0.00843357	2.29784	2.29784	apple up vs pear	0.350837	9.18343	0.506827	0.827839	1	0.0539691	0.0454142	0.890474	0.61521	0.799774	0.628113	0.459811	0.61539	0.816583	0.458986	0.544833	0.136057	0.548868	0.134535	0.78696	0.0566799	0.512227
629026	cg19311470	4	39460490	F	RPL9	TSS1500	Island	Promoter_Associated	0	0.00856993	0.00856993	3.96195	3.96195	apple up vs pear	0.380842	9.1358	0.597226	0.980581	1	0.516865	0.0557758	0.949638	0.523411	0.514191	0.11505	0.065339	0.930638	0.525631	0.497337	0.010734	0.0649101	0.498724	0.0881762	0.555722	0.060043	0.0220646
652231	cg20139683	12	133250118	R	POLE	Body	Island		49	0.00859765	0.00859765	1.64356	1.64356	apple up vs pear	0.315676	9.12622	0.410328	0.674422	1	0.890006	0.890828	0.885944	0.404525	0.908322	0.274913	0.419951	0.874462	0.93819	0.834451	0.768427	0.363361	0.869329	0.837116	0.741158	0.279132	0.315426
276876	cg08158105	12	125509502	R	BRI3BP	Body	N_Shore		28	0.00886668	0.00886668	1.59241	1.59241	apple up vs pear	0.31653	9.03507	0.412553	0.684919	1	0.21419	0.196669	0.904917	0.653764	0.9037	0.863672	0.836324	0.916969	0.843786	0.766784	0.841012	0.896571	0.907687	0.870192	0.8996	0.463807	0.268942
39408	cg01111656	13	101167993	R	PCCA	Body		Unclassified	37	0.00887707	0.00887707	1.70346	1.70346	apple up vs pear	0.357897	9.03161	0.52743	0.875973	1	0.021183	0.329353	0.911344	0.93249	0.811167	0.867301	0.260345	0.818213	0.858066	0.892422	0.700669	0.283616	0.952011	0.823199	0.967058	0.898855	0.900716
560628	cg16950711	5	126944112	R					44	0.00892978	0.00892978	1.60359	1.60359	apple up vs pear	0.30439	9.01415	0.381513	0.634858	1	0.844055	0.0483927	0.836599	0.75368	0.758644	0.783983	0.662952	0.836268	0.784433	0.774472	0.852357	0.570306	0.849142	0.88236	0.75897	0.542823	0.077607
388634	cg11627968	7	139351108	F	HIPK2	Body			0	0.00895695	0.00895695	1.50523	1.50523	apple up vs pear	0.294404	9.00519	0.356892	0.594476	1	0.882756	0.0265373	0.877908	0.853783	0.869295	0.87003	0.853007	0.828047	0.876936	0.872327	0.936248	0.514554	0.900452	0.8636	0.892568	0.457552	0.474551
186964	cg05455372	7	64314295	R	LOC168474	TSS200			39	0.00939092	0.00939092	0.563607	-1.77429	apple down vs pear	-0.333335	8.86622	0.457521	0.77404	1	0.88682	0.81853	0.0444566	0.344917	0.168003	0.787337	0.634319	0.781856	0	0.475107	0.699039	0.833357	0.58609	0.641343	0.564241	0.572618	0.8139
730538	cg23021160	2	73869666	R	NAT8	TSS200			2	0.00974389	0.00974389	0.47911	-2.08721	apple down vs pear	-0.23132	8.75851	0.220331	0.377344	1	0.553053	0.541343	0.129857	0.161512	0.322887	0.294487	0.494807	0	0.254723	0.208279	0.228895	0.617858	0.121633	0.609406	0.0904657	0.226637	0.380416
244145	cg07166908	17	50807681	R					39	0.00994443	0.00994443	1.72183	1.72183	apple up vs pear	0.327624	8.69929	0.441977	0.762091	1	0	0.241507	0.823449	0.694139	0.895075	0.895666	0.617375	0.658801	0.717213	0.916476	0.818277	0.433759	0.810861	0.759476	0.721258	0.825601	0.163245
164352	cg04790916	Y	15591260	R	UTY	Body	Island			0.0102089	0.0102089	2.36336	2.36336	apple up vs pear	0.232436	8.62325	0.222462	0.386969	1	0.0158411	0.0807883	0.211563	0.229777	0.413703	0.308134	0.00749088	0.671237	0.377481	0.450392	0.307844	0.248817	0.225001	0.421979	0.720266	0.295099	0.237247
469723	cg14129329	9	136769545	F	VAV2	Body			0	0.0105814	0.0105814	1.69779	1.69779	apple up vs pear	0.222103	8.51989	0.203123	0.357616	1	0.453304	0.184807	0.517972	0.621549	0.734737	0.582237	0.384544	0.6766	0.574252	0.525128	0.335607	0	0.527367	0.449036	0.441726	0.208784	0.414381
722710	cg22741595	11	77532707	R	C11orf67	5'UTR	S_Shore	Promoter_Associated	8	0.0106351	0.0106351	0.277283	-3.60643	apple down vs pear	-0.232995	8.50533	0.223534	0.394224	1	0.509855	0.0489289	0.000903974	0.0779235	0.00667378	0.52523	0.234807	0.119747	0.278699	0	0.127319	0.570294	0.0327515	0.0992627	0.150645	0	0.3676
382738	cg11431762	19	3571445	R	HMG20B	TSS1500	N_Shore		34	0.0106554	0.0106554	0.5755	-1.73762	apple down vs pear	-0.222554	8.49984	0.203948	0.359914	1	0.381011	0.665197	0.369072	0.434847	0.0778857	0.483278	0.350329	0.385078	0.413127	0.0710251	0.349021	0.393957	0.411871	0.404358	0.100906	0.701852	0.694286
210323	cg06164346	16	67742325	R	GFOD2	Body			1	0.0109271	0.0109271	2.02664	2.02664	apple up vs pear	0.253404	8.42764	0.264409	0.47061	1	0.681254	0.0212227	0.426164	0.429697	0.445184	0.359363	0.103967	0.712179	0.461237	0.649394	0.616736	0.108024	0.432549	0.333095	0.496093	0.384418	0.0695534
67337	cg01933473	1	11132637	F	EXOSC10	Body			1	0.0109463	0.0109463	0.581057	-1.721	apple down vs pear	-0.330738	8.42263	0.45042	0.80216	1	0.820077	0.810962	0.158858	0.795447	0.282999	0.834647	0.811589	0.324278	0.00828605	0.77155	0.731107	0.730064	0.209148	0.770272	0.53526	0.77502	0.74385
443128	cg13370086	1	55260950	R	TTC22	Body			50	0.0110615	0.0110615	0.767188	-1.30346	apple down vs pear	-0.201964	8.39267	0.167956	0.300183	1	0.921478	0.899645	0.911727	0.466613	0.829092	0.921679	0.831514	0.560457	0.556717	0.522186	0.528654	0.911615	0.910821	0.575638	0.793423	0.741607	0.844936
833651	cg26668828	6	292823	F	DUSP22	Body	Island	Promoter_Associated	10	0.0110773	0.0110773	0.449814	-2.22314	apple down vs pear	-0.20477	8.3886	0.172656	0.308733	1	0.364726	0.46574	0.00659062	0.311472	0	0.345679	0.411494	0.311682	0.0244281	0.322418	0.316355	0.476024	0.00931229	0.0557552	0.316118	0.420228	0.121391
82419	cg02372539	6	168703878	F	DACT2	Body			0	0.0113072	0.0113072	1.46958	1.46958	apple up vs pear	0.214426	8.32999	0.189324	0.340919	1	0.760393	0.441	0.739337	0.777314	0.465027	0.5933	0.443016	0.654181	0.726653	0.686316	0.787827	0.382128	0.742573	0.451104	0.680223	0.426278	0.15029
115050	cg03325394	20	58406750	F	PHACTR3	Body			0	0.0116188	0.0116188	1.76686	1.76686	apple up vs pear	0.206102	8.25274	0.17491	0.317913	1	0.555934	0.397079	0.375052	0.395643	0.564434	0.390366	0.0807496	0.377703	0.586356	0.583712	0.387184	0.0737332	0.389762	0.513945	0.574856	0.0603862	0.323087
253123	cg07437923	16	4506231	R	DNAJA3	3'UTR			2	0.0116479	0.0116479	0.349069	-2.86477	apple down vs pear	-0.256342	8.24563	0.270575	0.492215	1	0.491943	0.450531	0.0367381	0.0926489	0	0.470245	0.0235071	0.0596614	0.477293	0.512204	0.0602452	0.478785	0.0588773	0	0.0769891	0.423156	0.418486
158365	cg04608203	12	20036136	F					1	0.0116485	0.0116485	0.647156	-1.54522	apple down vs pear	-0.238622	8.24549	0.234461	0.426526	1	0.63884	0.666525	0.124183	0.621339	0.683167	0.762719	0.663258	0.256001	0.623087	0.623945	0.618537	0.662084	0.215771	0.354322	0.256242	0.648602	0.691943
225373	cg06628792	Y	21240004	F	TTTY14	TSS1500	Island			0.011702	0.011702	0.369458	-2.70667	apple down vs pear	-0.246138	8.39492	0.227189	0.378878	1	?	0.244163	0.311291	0	0.0377851	0.476857	0.425923	0	0.313984	0.531805	0	0.410864	0.0301259	0.0266405	0.190581	0.531201	0.253146
590407	cg17925226	4	95697675	R	BMPR1B	5'UTR			40	0.0118411	0.0118411	1.74083	1.74083	apple up vs pear	0.337838	8.36031	0.449406	0.752566	1	0.887356	0	0.821523	0.88232	0.761835	0.625487	0.666294	0.781679	0.718255	0.870222	0.946248	0.312515	?	0.651456	0.711268	0.057842	0.64271
12973	cg00366190	19	33622942	R	WDR88	TSS200	Island		46	0.0118448	0.0118448	0.531705	-1.88074	apple down vs pear	-0.385031	8.19816	0.610437	1.1169	1	0.933588	0.925595	0.1723	0.948178	0.288061	0.38956	0.876555	0.806288	0.885216	0.386187	0.295593	0.841418	0.228803	0.13435	0.226696	0.881569	0.907104
415693	cg12482564	4	170703951	F					1	0.0119429	0.0119429	1.48496	1.48496	apple up vs pear	0.211201	8.17484	0.183672	0.337019	1	0.613428	0.551604	0.708133	0.832394	0.544427	0.279341	0.468661	0.490209	0.585753	0.535605	0.497119	0.47519	0.741886	0.684233	0.847301	0.129806	0.530504
687004	cg21415084	12	84218134	F					1	0.0119743	0.0119743	2.36361	2.36361	apple up vs pear	0.348454	8.16741	0.499967	0.918222	1	0.216154	0.133241	0.750506	0.821166	0.797519	0.760398	0	0.737599	0.335995	0.660852	0.17261	0.39034	0.761847	0.27023	0.731595	0.122633	0.165996
102555	cg02956194	6	153455993	R			S_Shelf		1	0.0120938	0.0120938	0.581095	-1.72089	apple down vs pear	-0.318502	8.13939	0.417709	0.769792	1	0.898023	0.862988	0.506752	0.132247	0.0758581	0.801043	0.853677	0.448686	0.099939	0.84353	0.509527	0.540668	0.504996	0.520252	0.776393	0.558945	0.806899
568127	cg17188017	16	16220858	R	ABCC1	Body			34	0.0121711	0.0121711	0.608558	-1.64323	apple down vs pear	-0.218033	8.12144	0.195747	0.361537	1	0.530434	0.60604	0.193665	0.511817	0.153188	0.596845	0.559443	0.0344846	0.262097	0.538776	0.564487	0.564395	0.168306	0.412304	0.550546	0.520831	0.521013
865873	rs5926356									0.0122382	0.0122382	0.49798	-2.00811	apple down vs pear	-0.363694	8.10596	0.544656	1.00788	1	0.482758	0.942258	0.470557	0.498067	0.406217	0.484137	0.450403	0.508034	0.0806898	0.883981	0.0125271	0.864377	0.0375255	0.489726	0.220347	0.898393	0.948905
816087	cg26067074	Y	22901468	R						0.0122954	0.0122954	0.418203	-2.39118	apple down vs pear	-0.250468	8.09283	0.258317	0.478788	1	0.131524	0.180553	0.247215	0.36024	0.111937	0.623314	0.704738	0.194206	0.0634453	0	0.448712	0.549285	0	0.202733	0.171905	0.470131	0.354004
276919	cg08159412	4	142231036	F						0.0124477	0.0124477	1.6792	1.6792	apple up vs pear	0.324428	8.05823	0.433397	0.806748	1	0	0.839572	0.861749	0.788104	0.790379	0	0.793968	0.75213	0.809141	0.816585	0.745957	0.49581	0.818981	0.782567	0.855287	0.417071	0.797196
174140	cg05074385	6	30137208	R	TRIM15	Body	N_Shelf		1	0.0128701	0.0128701	1.33775	1.33775	apple up vs pear	0.212869	7.96475	0.186585	0.351394	1	0.847156	0.488505	0.859108	0.750562	0.872983	0.65319	0.678746	0.809902	0.840713	0.754496	0.88162	0.182196	0.885223	0.840083	0.93663	0.828316	0.733729
865846	rs133860									0.0128937	0.0128937	2.72061	2.72061	apple up vs pear	0.323148	7.95963	0.429984	0.810309	1	0.463017	0.0189029	0.959765	0.0426437	0.886237	0.0500415	0.476331	0.459264	0.462566	0.433149	0.471374	0.0866431	0.480608	0.441918	0.472061	0.107137	0.112601
343454	cg10195365	3	58071644	F	FLNB	Body			0	0.0129647	0.0129647	2.29871	2.29871	apple up vs pear	0.282752	7.94429	0.3292	0.621579	1	0.39745	0.0387124	0.661537	0.577097	0.743122	0.039502	0.453356	0.419331	0.655697	0.36793	0.410472	0.0504594	0.417518	0.665238	0.0867501	0.476948	0.0675929
255224	cg07499288	3	107318139	R	BBX	5'UTR		Promoter_Associated_Cell_type_specific	35	0.0130248	0.0130248	2.89013	2.89013	apple up vs pear	0.204227	7.93138	0.171742	0.324802	1	0.170462	0.0968063	0.112591	0.509729	0.153668	0.200405	0.207219	0.492513	0.4291	0.257663	0.402178	0	0.0967225	0.520994	0.147606	0	0.0814511
16144	cg00455242	3	52872820	F	TMEM110-MUSTN1	Body			4	0.013414	0.013414	0.688465	-1.45251	apple down vs pear	-0.224739	7.84945	0.207973	0.397428	1	0.633685	0.908116	0.618479	0.689176	0.538231	0.458043	0.668509	0.259176	0.654587	0.306604	0.318966	0.631666	0.645236	0.484753	0.45133	0.857219	0.892514
831086	cg26576353	10	126135176	R			N_Shore		1	0.0138499	0.0138499	1.41775	1.41775	apple up vs pear	0.212883	7.76085	0.186609	0.360674	1	0.559946	0.553635	0.814119	0.58838	0.793286	0.524417	0.722123	0.839693	0.541051	0.844749	0.821038	0.326292	0.827637	0.361409	0.793383	0.53642	0.344305
141443	cg04109990	9	12795679	F	LURAP1L	Body			0	0.0141041	0.0141041	1.79608	1.79608	apple up vs pear	0.202042	7.71066	0.168086	0.326988	1	0.352208	0.0311925	0.518805	0.357842	0.537997	0.546568	0.330109	0.311408	0.624287	0.526351	0.457553	0.364486	0.302844	0.426463	0.494822	0.0904814	0.0615203
555723	cg16788050	11	8053406	R			Island		40	0.0141136	0.0141136	1.51065	1.51065	apple up vs pear	0.220899	7.70881	0.200926	0.390967	1	0.731779	0.704352	0.630604	0.712969	0.669654	0.150174	0.482865	0.71515	0.713897	0.681432	0.48065	0.256938	0.671189	0.716896	0.542362	0.206022	0.495941
200247	cg05865243	Y	6114255	R	TSPY2	TSS200	Island			0.0141316	0.0141316	1.9571	1.9571	apple up vs pear	0.235744	7.70528	0.228839	0.445485	1	0.0942523	0.232969	0.0562177	0.457695	0.631365	0.427363	0.354059	0.570609	0.424453	0.690437	0.743266	0.185538	0.361139	0.533969	0.351395	0.28819	0.141803
798356	cg25420101	5	76785615	R	WDR41	Body	N_Shelf		1	0.014414	0.014414	1.7782	1.7782	apple up vs pear	0.261074	7.65085	0.280657	0.550247	1	0.284691	0.295502	0.285046	0.329255	0.815732	0.332904	0.31238	0.886977	0.57962	0.312208	0.789549	0.575706	0.584696	0.831695	0.550812	0.232479	0.314733
17453	cg00491047	14	23831177	R	EFS	Body	N_Shelf		2	0.0145866	0.0145866	2.18234	2.18234	apple up vs pear	0.368744	7.61817	0.559887	1.1024	1	0.14101	0.139813	0.861172	0.85735	0.813683	0.778432	0.361499	0.813892	0.863953	0.779913	0.825657	0.288437	0.140248	0.0936735	0.756668	0.184063	0.289883
817657	cg26119875	17	65729990	R	NOL11	Body			29	0.0145969	0.0145969	0.679173	-1.47238	apple down vs pear	-0.201995	7.61623	0.168008	0.330887	1	0.539226	0.55304	0.540711	0.326152	0.416371	0.581465	0.818855	0.316707	0.39185	0.406165	0.718029	0.51291	0.552979	0.145116	0.462036	0.836242	0.565507
189907	cg05546557	5	180646	F	PLEKHG4B	Body	N_Shore		0	0.0146447	0.0146447	1.6519	1.6519	apple up vs pear	0.27189	7.60728	0.304393	0.6002	1	0.738792	0.4437	0.715935	0.728862	0.740348	0.686253	0.657627	0.713782	0.765347	0.687331	0.669377	0.0403894	0.458623	0.700324	0.709716	0.322147	0.0306154
771451	cg24470466	6	32608858	F	HLA-DQA1	Body			0	0.0148842	0.0148842	0.642911	-1.55542	apple down vs pear	-0.252176	7.56287	0.261853	0.519352	1	0.81165	0.776788	0.46441	0.50083	0.19531	0.717653	0.706106	0.183074	0.539204	0.770168	0.478417	0.24911	0.476521	0.507836	0.424471	0.880422	0.801672
232996	cg06844719	16	9326393	F					1	0.0150012	0.0150012	1.77204	1.77204	apple up vs pear	0.265399	7.54147	0.290032	0.576875	1	0.161157	0.125753	0.683895	0.629306	0.590823	0.61956	0.387203	0.582561	0.118412	0.719545	0.724861	0.590578	0.673695	0.73435	0.634173	0.103653	0.418442
459476	cg13837834	5	180728293	F						0.0152451	0.0152451	1.67543	1.67543	apple up vs pear	0.244409	7.49749	0.245971	0.492107	1	0.631195	0.182518	0.641941	0.441952	0.443662	0.55773	0.543368	0.667379	0.709789	0.716431	0.696112	0	0.645335	0.429709	0.670356	0.472501	0.14569
274967	cg08101922	7	119909506	R			N_Shelf		13	0.0153569	0.0153569	1.57367	1.57367	apple up vs pear	0.211885	7.47758	0.184864	0.370835	1	0.448253	0.412093	0.431553	0.658445	0.666103	0.658359	0.451856	0.629902	0.388204	0.705699	0.695353	0.140111	0.425587	0.609431	0.602056	0.404566	0.0701978
190236	cg05557315	Y	9476544	F			N_Shore			0.0157242	0.0157242	1.88999	1.88999	apple up vs pear	0.232266	7.41339	0.222137	0.449464	1	0.200769	0.168739	0.324821	0.33127	0.660641	0.256385	0.481016	0.51783	0.244492	0.582581	0.680925	0.29719	0.249491	0.821106	0.51925	0.327038	0.0956869
205981	cg06031234	14	90234548	F					0	0.0158829	0.0158829	0.53518	-1.86853	apple down vs pear	-0.342457	7.38618	0.482904	0.98069	1	0.85283	0.841932	0.860813	0.155054	0.125813	0.809834	0.87688	0.533817	0.342102	0.665723	0.136148	0.527877	0	0.308523	0.81495	0.704145	0.543759
393694	cg11784298	6	32610971	R	HLA-DQA1	3'UTR			47	0.0158906	0.0158906	0.595071	-1.68047	apple down vs pear	-0.274782	7.38486	0.310902	0.6315	1	0.738242	0.754341	0.0952503	0.561957	0.0479921	0.704736	0.638861	0.661104	0.215834	0.645333	0.562679	0.660196	0.0777844	0.520965	0.649196	0.659202	0.594559
247217	cg07258983	18	42255459	F			N_Shelf		0	0.0160795	0.0160795	1.48924	1.48924	apple up vs pear	0.265657	7.35289	0.290598	0.592824	1	0.520575	0.0426269	0.903508	0.844352	0.497374	0.82872	0.487793	0.808974	0.956116	0.815436	0.777843	0.493387	0.882172	0.822018	0.778738	0.54076	0.88711
4577	cg00123214	1	95703607	F	RWDD3	Body	S_Shelf		0	0.0160924	0.0160924	1.49338	1.49338	apple up vs pear	0.232656	7.35072	0.222883	0.454818	1	0.812811	0.48086	0.819169	0.728396	0.806204	0.43243	0.497524	0.786788	0.802213	0.516555	0.838245	0.127779	0.802906	0.522343	0.419246	0.479261	0.47019
709239	cg22237495	1	27964774	R			S_Shelf		46	0.016141	0.016141	1.4474	1.4474	apple up vs pear	0.233961	7.34258	0.22539	0.460445	1	0.801974	0.0443287	0.810962	0.510649	0.758521	0.520182	0.781408	0.754263	0.755584	0.743594	0.768698	0.557953	0.825587	0.857381	0.783663	0.508118	0.446542
789429	cg25099095	6	156954565	R			S_Shelf		29	0.0162568	0.0162568	3.0896	3.0896	apple up vs pear	0.413904	7.32328	0.705422	1.44489	1	0.0293829	0.493477	0.51677	0.0523664	0.898466	0.10738	0.574031	0.921885	0.910957	0.922057	0.482091	0.101912	0.0290236	0.513296	0.872916	0.0464093	0.0339563
26077	cg00730761	6	101113084	R	ASCC3	Body		Unclassified_Cell_type_specific	1	0.0165005	0.0165005	2.12089	2.12089	apple up vs pear	0.247835	7.28318	0.252916	0.52089	1	0.430233	0.452718	0.437496	0.406642	0.734469	0.0459098	0.0645093	0.145146	0.420746	0.447014	0.482029	0.474369	0.444684	0.702111	0.469078	0.0542578	0.025746
380618	cg11366142	8	103953989	R	AZIN1-AS1	Body			37	0.0165688	0.0165688	3.32451	3.32451	apple up vs pear	0.283916	7.27206	0.331916	0.684638	1	0.0513415	0.0470788	0.504171	0.0899289	0.145576	0.0692093	0.110785	0.888259	0.507185	0.467734	0.4658	0.433119	0.043654	0.489987	0.45826	0.053954	0.0894913
529243	cg15972370	7	144422234	F	TPK1	Body			0	0.0166071	0.0166071	1.55264	1.55264	apple up vs pear	0.284848	7.26586	0.3341	0.689732	1	0.873928	0.0480766	0.846936	0.61033	0.796383	0.731956	0.675663	0.877255	0.664583	0.853212	0.777471	0.598019	0.867458	0.855614	0.853551	0.0895417	0.590833
845698	cg27076160	10	64431533	R	ZNF365	3'UTR			33	0.0166411	0.0166411	1.73536	1.73536	apple up vs pear	0.291608	7.26037	0.350144	0.723402	1	0.499705	0.0632017	0.773436	0.828778	0.775569	0.808205	0.685053	0.430941	0.484931	0.741865	0.743755	0.136267	0.801145	0.695958	0.605236	0.0779532	0.505489
178228	cg05197228	1	194337692	F					0	0.0166532	0.0166532	0.676218	-1.47881	apple down vs pear	-0.243279	7.25841	0.243703	0.503628	1	0.836145	0.870993	0.646193	0.399055	0.79535	0.546485	0.765117	0.564713	0.626829	0	0.500977	0.890213	0.540321	0.467309	0.54015	0.584766	0.765865
83456	cg02401352	15	89354338	R	ACAN	5'UTR			47	0.0168032	0.0168032	0.619512	-1.61417	apple down vs pear	-0.236964	7.23431	0.231213	0.479409	1	0.385768	0.692307	0.382796	0.699806	0.491763	0.410354	0.738794	0.574344	0.450002	0.345824	0.0876456	0.700301	0.378307	0.0757227	0.372035	0.711953	0.720042
43181	cg01221582	14	105695807	R	BRF1	Body			50	0.0168366	0.0168366	1.45583	1.45583	apple up vs pear	0.238325	7.22899	0.233877	0.485289	1	0.798538	0.0271842	0.792738	0.749981	0.784182	0.79507	0.751584	0.786031	0.711433	0.748383	0.77566	0.414484	0.79715	0.701024	0.764975	0.421126	0.451832
714990	cg22460601	8	7189563	R	USP17L1	TSS1500			49	0.0170675	0.0170675	1.4753	1.4753	apple up vs pear	0.21572	7.19247	0.191616	0.399618	1	0.700221	0.650063	0.729815	0.610671	0.599514	0.649124	0.606464	0.658412	0.716733	0.62977	0.703391	0.115741	0.734784	0.64316	0.669526	0.24096	0.214426
826532	cg26422465	1	3561008	F	WDR8	Body	Island		0	0.0172672	0.0172672	0.548517	-1.8231	apple down vs pear	-0.27228	7.16134	0.305268	0.639407	1	0.394066	0.717355	0.058058	0.0708915	0.0669907	0.612716	0.691512	0.659534	0.400652	0.43717	0.0954253	0.435504	0.68657	0.416878	0.415827	0.665578	0.704826
496573	cg14916192	4	54447772	F	LNX1	5'UTR			0	0.0175753	0.0175753	0.708141	-1.41215	apple down vs pear	-0.200079	7.11412	0.164836	0.347555	1	0.670918	0.76468	0.620671	0.724329	0.619774	0.674834	0.788991	0.241695	0.495368	0.571835	0.673689	0.563647	0.266063	0.407265	0.233851	0.694558	0.641104
99713	cg02877261	4	186061165	R			N_Shelf		46	0.0179704	0.0179704	0.505135	-1.97967	apple down vs pear	-0.234775	7.05494	0.226962	0.482559	1	0.362821	0.382443	0.365171	0.0715477	0.00972086	0.351352	0.394621	0	0.396636	0.0857994	0.109149	0.604042	0.350723	0.579464	0.428262	0.581488	0.64419
12491	cg00352417	3	194408901	F	FAM43A	3'UTR	Island		48	0.0179977	0.0179977	2.88065	2.88065	apple up vs pear	0.227743	7.05091	0.21357	0.454345	1	0.067085	0.208846	0.196789	0.467646	0.511836	0.0255685	0.208301	0	0.431478	0.590714	0.275985	0.337887	0.0892461	0.436116	0.488604	0	0
815187	cg26033510	6	110147565	F					0	0.0183885	0.0183885	0.611462	-1.63542	apple down vs pear	-0.271615	6.99393	0.303778	0.651518	1	0.838568	0.845942	0.82796	0.350034	0.114641	0.563024	0.438868	0.479699	0.424373	0.483807	0.525457	0.512756	0.496109	0.510769	0.0616888	0.745949	0.948375
28717	cg00807008	2	122219913	R	CLASP1	Body			19	0.0185088	0.0185088	1.44138	1.44138	apple up vs pear	0.249557	6.97668	0.256442	0.551357	1	0.576163	0.597151	0.902545	0.801911	0.826325	0.820084	0.800327	0.786841	0.471812	0.844956	0.943859	0.53374	0.89159	0.739154	0.940646	0.0577761	0.572605
486920	cg14615128	7	6568678	F	GRID2IP	Body	N_Shore		0	0.0185204	0.0185204	0.667063	-1.49911	apple down vs pear	-0.261549	6.97502	0.28168	0.605762	1	0.836166	0.860127	0.494721	0.601736	0.5142	0.73526	0.776058	0.164494	0.0830853	0.679953	0.509081	0.930957	0.857685	0.51962	0.815761	0.683644	0.676868
215599	cg06330797	6	167195910	R	RPS6KA2	Body	N_Shore		40	0.0185362	0.0185362	1.6857	1.6857	apple up vs pear	0.316646	6.97276	0.412855	0.888145	1	0.512171	0.506812	0.875461	0.479817	0.897307	0.827181	0.0722744	0.851673	0.471078	0.790342	0.868709	0.845329	0.880876	0.821883	0.847164	0	0.468728
495049	cg14866535	20	49227989	R	FAM65C	Body			45	0.0187081	0.0187081	1.88271	1.88271	apple up vs pear	0.233565	6.94837	0.224628	0.484922	1	0.0789317	0.0966548	0.530058	0.603174	0.570494	0.0861055	0.234127	0.578262	0.636304	0.386401	0.555645	0.199419	0.142003	0.525583	0.453705	0.575117	0.581833
533319	cg16099839	9	96677733	F					1	0.0187229	0.0187229	0.569578	-1.75569	apple down vs pear	-0.335962	6.94627	0.46476	1.00362	1	0.845339	0.826126	0.207027	0.781558	0.354311	0.751814	0.798164	0.720353	0.689798	0.260976	0.61836	0.867677	0.813399	0	0	0.511717	0.862943
512275	cg15431336	Y	4872931	F	PCDH11Y	5'UTR	S_Shore			0.0190951	0.0190951	2.03081	2.03081	apple up vs pear	0.249848	6.89437	0.257039	0.559238	1	0	0.173669	0.223581	0.73227	0.479953	0.484583	0.485243	0.549123	0.649677	0.349235	0.368924	0.15022	0.188876	0.700931	0.679701	0.170347	0.232593
467115	cg14053194	13	21517918	F	LINC00367	Body	N_Shelf	Unclassified_Cell_type_specific	1	0.0191757	0.0191757	5.05169	5.05169	apple up vs pear	0.200561	6.88329	0.165631	0.360943	1	0.0434452	0.0297267	0.0149162	0.234661	0.155084	0	0.0454134	0.572575	0.484719	0.0237444	0.481822	0.0918509	0.235274	0.183147	0.114676	0.112641	0.0234278
817405	cg26111679	8	27220309	R	PTK2B	5'UTR			27	0.0192573	0.0192573	2.46942	2.46942	apple up vs pear	0.231863	6.87212	0.221367	0.483184	1	0.0582099	0.375572	0.0578686	0.372172	0.354724	0.367843	0.0578173	0.389989	0.0570122	0.391859	0.543113	0.0801694	0.613897	0.544429	0.571491	0.107298	0.0576381
252088	cg07404046	20	1569554	R	SIRPB1	Body			16	0.0194235	0.0194235	1.71163	1.71163	apple up vs pear	0.225611	6.84954	0.20959	0.458988	1	0.258601	0.244163	0.467822	0.866877	0.489632	0.444033	0.566924	0.685027	0.498248	0.590294	0.501948	0.48115	0.574801	0.516115	0.2357	0.224374	0
407958	cg12228627	1	90374649	R	LRRC8D	5'UTR			28	0.019441	0.019441	3.01902	3.01902	apple up vs pear	0.230695	6.84717	0.219141	0.480069	1	0.1169	0.213336	0.208095	0.686324	0.136421	0.144468	0	0.237338	0.538468	0.356445	0.566794	0	0.110796	0.491138	0.117733	0.292183	0.0329365
756856	cg23954274	10	133195058	R					26	0.0194717	0.0194717	0.647012	-1.54557	apple down vs pear	-0.204634	6.84304	0.172426	0.37796	1	0.522354	0.508231	0.518218	0.524658	0.451779	0.692864	0.616072	0.53216	0	0.472263	0.0888666	0.589249	0.209571	0.456089	0.497249	0.548174	0.581088
92887	cg02675432	2	162208258	R	PSMD14	Body			26	0.019981	0.019981	0.615459	-1.6248	apple down vs pear	-0.304947	6.77539	0.382911	0.847725	1	0.926976	0.891829	0.885982	0	0.601815	0.730161	0.68944	0.605918	0.181944	0.751343	0.363606	0.640113	0.188226	0.532591	0.76926	0.7845	0.88809
27173	cg00762003	21	45393541	F	AGPAT3	Body	Island		1	0.020144	0.020144	1.50667	1.50667	apple up vs pear	0.261377	6.75416	0.28131	0.624749	1	0.797087	0.191994	0.803863	0.735182	0.806949	0.753159	0.772662	0.772448	0.824367	0.759339	0.776303	0.713979	0.790517	0.739304	0.764233	0.365229	0.0169997
602262	cg18339359	8	23423757	R	SLC25A37	Body			31	0.0201703	0.0201703	0.586162	-1.70601	apple down vs pear	-0.351292	6.86515	0.462772	0.943725	1	0.89524	?	0.125525	0.781826	0.206558	0.85014	0.549161	0.121637	0.527751	0.879259	0.352075	0.920672	0.860021	0.365639	0.75542	0.906667	0.971298
229777	cg06754542	8	128918941	R	PVT1	Body			37	0.0203055	0.0203055	1.67617	1.67617	apple up vs pear	0.330481	6.73332	0.44972	1.00185	1	0.902641	0.0401096	0.886458	0.503051	0.787131	0.85666	0.815803	0.946443	0.860069	0.91693	0.807405	0.137899	0.898365	0.789861	0.796663	0.140025	0.528159
656529	cg20300784	2	64839958	R			S_Shelf		1	0.020823	0.020823	0.629866	-1.58764	apple down vs pear	-0.275848	6.66781	0.31332	0.70485	1	0.475724	0.796038	0.795162	0.468438	0.452885	0.725797	0.846257	0.744104	0.468921	0.76764	0.0694118	0.832175	0.050842	0.455472	0.421299	0.741046	0.799821
157816	cg04592386	19	33357843	F	SLC7A9	Body			1	0.0211351	0.0211351	1.43226	1.43226	apple up vs pear	0.232933	6.62921	0.223415	0.505523	1	0.136916	0.809536	0.770435	0.768668	0.753834	0.681476	0.713068	0.749353	0.768931	0.784546	0.77565	0.764507	0.808798	0.738233	0.7996	0.533665	0.132935
117505	cg03398919	2	173118470	R					35	0.0213846	0.0213846	0.623835	-1.60299	apple down vs pear	-0.271648	6.59881	0.303853	0.6907	1	0.798024	0.720778	0.80121	0.742836	0.216468	0.588266	0.698211	0.266388	0.674615	0.0990896	0.38801	0.755637	0.0959468	0.666465	0.554011	0.691093	0.803057
646673	cg19935756	4	47423779	R	GABRB1	Body	N_Shelf		36	0.021547	0.021547	2.10715	2.10715	apple up vs pear	0.318386	6.57925	0.417406	0.951642	1	0.775498	0.0500026	0.467439	0.0831506	0.512933	0.0767541	0.0906306	0.717815	0.784561	0.769307	0.775072	0.465009	0.774216	0.443562	0.731534	0.46584	0.0892736
118677	cg03433448	6	24329729	F	DCDC2	Body			1	0.0215942	0.0215942	1.41544	1.41544	apple up vs pear	0.235242	6.57359	0.227865	0.519957	1	0.883475	0.218223	0.86888	0.731926	0.669609	0.783441	0.654345	0.866432	0.938028	0.842198	0.770954	0.282773	0.879576	0.860602	0.586753	0.736506	0.405014
29002	cg00814218	14	37445440	F	SLC25A21	Body		Unclassified_Cell_type_specific	0	0.021596	0.021596	2.22248	2.22248	apple up vs pear	0.233382	6.57337	0.224276	0.511783	1	0.414071	0.0483102	0.325633	0.349604	0.648893	0.388188	0.0970311	0.41833	0	0.576772	0.629614	0.140626	0.638545	0.274659	0.380858	0.101195	0.146941
667323	cg20697683	3	194121173	R	GP5	TSS1500	S_Shelf		11	0.0216132	0.0216132	1.56922	1.56922	apple up vs pear	0.227745	6.57132	0.213572	0.48751	1	0.6664	0.195399	0.639031	0.679287	0.600932	0.663676	0.305654	0.504008	0.726932	0.635311	0.497185	0.67104	0.695064	0.625998	0.674703	0	0.298534
440541	cg13288846	7	155234510	R					41	0.0216318	0.0216318	1.60849	1.60849	apple up vs pear	0.214013	6.5691	0.188594	0.430639	1	0.377818	0.0402605	0.60424	0.36533	0.661555	0.609174	0.379143	0.386359	0.630117	0.603015	0.626996	0.403297	0.615158	0.573424	0.591031	0.037594	0.614683
515719	cg15546285	22	31999222	F	SFI1	Body			1	0.0216628	0.0216628	2.20914	2.20914	apple up vs pear	0.343716	6.5654	0.486461	1.11142	1	0.723946	0.0388068	0.757714	0.763137	0.718669	0.180855	0.204508	0.371953	0.790449	0.695319	0	0	0.752723	0.706054	0.723796	0.1401	0.701645
49060	cg01394772	20	17883681	F					0	0.0219304	0.0219304	1.43147	1.43147	apple up vs pear	0.235442	6.53372	0.228253	0.524019	1	0.477058	0.0388959	0.8086	0.808196	0.862342	0.796617	0.772002	0.790924	0.784628	0.761939	0.50828	0.76712	0.801803	0.841021	0.84339	0.464653	0.503347
170896	cg04982228	6	24458460	R	GPLD1	Body			2	0.0223271	0.0223271	5.38673	5.38673	apple up vs pear	0.25427	6.48759	0.266219	0.615526	1	0.0378664	0.0321855	0.0346895	0.44473	0.0473631	0.0485453	0.0915045	0.461508	0.464002	0.0654548	0.394025	0.0754576	0.427962	0.782597	0	0.0203701	0.0998146
492876	cg14799809	6	32608095	R	HLA-DQA1	Body			44	0.0227744	0.0227744	0.673351	-1.48511	apple down vs pear	-0.272166	6.43668	0.305011	0.710795	1	0.899972	0.897458	0.0295852	0.713369	0.461778	0.675068	0.792201	0.663958	0.332062	0.632755	0.759143	0.796048	0.300576	0.878358	0.838799	0.884315	0.887365
744519	cg23517115	5	6581849	R	LOC255167	TSS1500	N_Shore		3	0.0230149	0.0230149	1.46977	1.46977	apple up vs pear	0.247304	6.40979	0.251831	0.589329	1	0.792903	0.765132	0.758906	0.816025	0.779571	0.330178	0.715374	0.80126	0.797585	0.832231	0.699023	0.092963	0.796585	0.753834	0.702325	0.793208	0.19526
276088	cg08133365	1	23435537	R	LUZP1	5'UTR			1	0.0233627	0.0233627	1.49415	1.49415	apple up vs pear	0.275002	6.37146	0.311401	0.733114	1	0.536089	0.514797	0.923167	0.888421	0.836561	0.505319	0.893635	0.971806	0.491684	0.965811	0.897153	0.0897685	0.516975	0.929425	0.894145	0.470988	0.884996
744387	cg23513244	18	55938203	F	NEDD4L	Body			1	0.0236155	0.0236155	1.61326	1.61326	apple up vs pear	0.298563	6.34402	0.367046	0.867854	1	0.8516	0.278801	0.826959	0.724669	0.739537	0.66894	0.761258	0.819149	0.732689	0.858603	0.821607	0.0399796	0.827616	0.648054	0.855227	0	0.80736
810814	cg25872828	18	68052588	F	LOC101060542	TSS1500			0	0.0236682	0.0236682	0.469977	-2.12777	apple down vs pear	-0.322565	6.33834	0.428433	1.01391	1	0.49931	0.905146	0.0481188	0.514136	0.0773582	0.51642	0.556643	0.540453	0.0544192	0.487337	0.0433669	0.901209	0.500118	0.126162	0.468743	0.0624802	0.818895
263089	cg07738664	14	31071558	F	G2E3	Body				0.0239842	0.0239842	1.5428	1.5428	apple up vs pear	0.29037	6.406	0.31618	0.690997	1	?	0.330694	0.8882	0.488706	0.811337	0.784229	0.882175	0.936638	0.886023	0.886184	0.761826	0.807089	0.91449	0.864055	0.815745	0.100303	0.305214
507834	cg15281606	2	238903310	F	UBE2F	Body			0	0.0240192	0.0240192	4.69274	4.69274	apple up vs pear	0.222671	6.30089	0.204162	0.486033	1	0.0478493	0.0306468	0.0396276	0.493166	0.0629605	0.0441007	0.0455896	0.475729	0.550342	0.483479	0.0314266	0.111526	0.499177	0.1146	0.0791981	0.0475509	0.0948345
381055	cg11379315	4	88755207	R	MEPE	5'UTR			1	0.0245432	0.0245432	0.672744	-1.48645	apple down vs pear	-0.244701	6.24614	0.246559	0.592107	1	0.872927	0.87859	0.890661	0.740819	0.540781	0.790972	0.536684	0.134482	0.488978	0.465027	0.631726	0.742504	0.148056	0.509435	0.480376	0.604725	0.807743
537308	cg16228451	1	201439941	F			S_Shore		1	0.0246656	0.0246656	0.712862	-1.4028	apple down vs pear	-0.256989	6.23354	0.271943	0.654386	1	0.886432	0.882186	0.2342	0.432091	0.257611	0.850775	0.943978	0.427984	0.836112	0.761132	0.897209	0.880616	0.888822	0.848895	0.796082	0.889628	0.931404
97856	cg02822944	8	66949849	F	DNAJC5B	5'UTR		Unclassified_Cell_type_specific	0	0.0247633	0.0247633	1.58799	1.58799	apple up vs pear	0.287617	6.22355	0.340627	0.82098	1	0.845984	0.47048	0.829303	0.506008	0.821446	0.79158	0.755548	0.78759	0.753329	0.744938	0.878997	0	0.825725	0.839919	0.780474	0.0481656	0.512331
121830	cg03525852	8	7055288	R					44	0.0248342	0.0248342	1.45422	1.45422	apple up vs pear	0.233872	6.21631	0.225219	0.543454	1	0.797153	0.768842	0.805463	0.748694	0.714287	0.201908	0.728639	0.747387	0.708395	0.758069	0.772706	0.55622	0.794585	0.732	0.70597	0.529305	0.022121
339397	cg10075506	2	1817351	F	MYT1L	Body			7	0.0250298	0.0250298	0.688084	-1.45331	apple down vs pear	-0.229922	6.19649	0.217676	0.526933	1	0.870592	0.512827	0.201335	0.520957	0.47743	0.744025	0.542611	0.572219	0.277436	0.750623	0.248594	0.836998	0.685152	0.797155	0.541158	0.813552	0.83929
329206	cg09761058	17	34296471	R				Unclassified	50	0.0250324	0.0250324	0.429248	-2.32966	apple down vs pear	-0.389026	6.19623	0.62317	1.50858	1	0.213663	0.933047	0	0.867904	0.366426	0.631238	0.829724	0	0.0307001	0.112218	0.313787	0.473819	0.301858	0.932868	0	0.828152	0.861571
399187	cg11951968	6	18586559	R					2	0.0250343	0.0250343	1.44915	1.44915	apple up vs pear	0.216248	6.19604	0.192554	0.466154	1	0.760536	0.0460688	0.690535	0.759244	0.706749	0.679148	0.626795	0.673171	0.681644	0.693301	0.653691	0.173985	0.718581	0.733723	0.66639	0.42516	0.658493
501512	cg15074403	7	55141475	R	EGFR	Body			29	0.0251778	0.0251778	0.351879	-2.84188	apple down vs pear	-0.259153	6.18161	0.276543	0.671045	1	0.0483082	0.693497	0.0449637	0.438554	0.111267	0.0310642	0.458552	0.451305	0.0520632	0.0797429	0.073227	0.422333	0.0473108	0.024177	0.0843906	0.461323	0.683896
426506	cg12833076	2	237494444	R					21	0.025267	0.025267	1.5784	1.5784	apple up vs pear	0.272866	6.1727	0.306583	0.745013	1	0.770844	0.155148	0.749822	0.791908	0.678451	0.678242	0.772035	0.732758	0.730069	0.717628	0.791065	0.156785	0.789715	0.72806	0.736767	0	0.769254
570224	cg17256465	3	171802458	F	FNDC3B	5'UTR			0	0.0254046	0.0254046	0.511241	-1.95602	apple down vs pear	-0.266418	6.15901	0.292265	0.711798	1	0.501395	0.442028	0.0455166	0.466127	0.00936045	0.58388	0.471419	0.361837	0.0222828	0.75511	0.458586	0.708095	0.496291	0.171619	0	0.68683	0.42199
712124	cg22349229	12	96115707	R	NTN4	Body			5	0.0255606	0.0255606	1.43289	1.43289	apple up vs pear	0.226234	6.1436	0.210749	0.514559	1	0.791525	0.814618	0.77307	0.690026	0.875986	0.581696	0.732249	0.759808	0.685787	0.792422	0.690809	0.21924	0.760247	0.726542	0.733741	0.10361	0.415328
865861	rs2385226									0.0255682	0.0255682	3.21976	3.21976	apple up vs pear	0.319	6.14284	0.419015	1.02318	1	0.397345	0.0212507	0.410126	0.487868	0.971391	0.0527669	0.400151	0.439039	0.0722262	0.424	0.438489	0.0728555	0.959352	0.367316	0.0572798	0	0.0615935
363828	cg10831113	1	222168110	F					0	0.0259502	0.0259502	0.744053	-1.34399	apple down vs pear	-0.203939	6.10557	0.171258	0.420742	1	0.805835	0.78506	0.800312	0.751507	0.52563	0.798432	0.736324	0.113409	0.731754	0.492089	0.487399	0.873882	0.506198	0.80315	0.717187	0.80395	0.774136
562617	cg17015133	1	155111332	R	RAG1AP1	3'UTR	N_Shore		42	0.0261539	0.0261539	2.77904	2.77904	apple up vs pear	0.241911	6.08595	0.240968	0.593911	1	0.150977	0.284409	0.381332	0	0.340372	0.114894	0.189569	0.526308	0.793682	0.442587	0	0	0.547771	0.300748	0.446085	0.211997	0
424479	cg12765935	12	95897447	F	METAP2	Body			0	0.026286	0.026286	1.373	1.373	apple up vs pear	0.234673	6.07333	0.226764	0.560065	1	0.856109	0.469339	0.863766	0.867867	0.886633	0.87519	0.86222	0.841211	0.842411	0.853724	0.904787	0.8114	0.856961	0.823028	0.897762	0.0868365	0.442901
570069	cg17251507	2	12214913	F	LOC100506457	Body			0	0.0263023	0.0263023	0.534929	-1.86941	apple down vs pear	-0.28848	6.07178	0.342674	0.846558	1	0.469326	0.856148	0.0351669	0.460741	0.0687081	0.805262	0.472071	0.486852	0.454734	0.492564	0.450912	0.451355	0.0320737	0.0581536	0.778224	0.824589	0.463303
373058	cg11128983	5	175297531	R	CPLX2	TSS1500	N_Shore		40	0.0264207	0.0264207	0.603157	-1.65794	apple down vs pear	-0.327643	6.06052	0.44203	1.09404	1	0.853018	0.852723	0.0728096	0.803427	0.344488	0.850705	0.790671	0	0.82184	0.356855	0.821227	0.837811	0.146388	0.797268	0.815503	0.793424	0.801014
168065	cg04898932	22	35645717	F					13	0.0265645	0.0265645	0.659287	-1.51679	apple down vs pear	-0.277442	6.04695	0.316952	0.786227	1	0.88374	0.908365	0.182463	0.809897	0.663035	0.901509	0.624104	0.2991	0.798832	0.590439	0.775415	0.819002	0.205412	0.194443	0.849521	0.762217	0.801145
286869	cg08463633	8	28102623	F					6	0.0268637	0.0268637	0.563591	-1.77434	apple down vs pear	-0.284686	6.01895	0.333719	0.831671	1	0.408749	0.870515	0.511688	0.185695	0.402352	0.285462	0.4385	0.65199	0.384063	0.0642485	0.421019	0.842752	0.483858	0	0.571605	0.846086	0.8743
478634	cg14381840	4	170122514	F	SH3RF1	Body			8	0.0270125	0.0270125	0.494311	-2.02302	apple down vs pear	-0.224064	6.00516	0.206725	0.516368	1	0.364787	0.330151	0.294233	0.363105	0	0.334607	0.525105	0.00155541	0.720145	0	0.13151	0.640941	0.275752	0.172022	0.231906	0.400003	0.506013
119215	cg03448017	16	83980015	F					0	0.0270568	0.0270568	1.65684	1.65684	apple up vs pear	0.244007	6.00107	0.245163	0.612798	1	0.691099	0.367388	0.647541	0.408196	0.678643	0.65308	0.649341	0.650142	0.713187	0.669739	0.654333	0.0732862	0.652846	0.433427	0.64686	0.0741532	0.0920409
604399	cg18416761	5	109217667	F	LOC100289673	TSS1500	N_Shelf		1	0.0271228	0.0271228	2.08127	2.08127	apple up vs pear	0.314174	5.995	0.406433	1.01693	1	0.0519737	0.193872	0.752394	0.681897	0.73227	0.78514	0.354436	0.685079	0.780755	0.703438	0.0603071	0.340093	0.709797	0.170536	0.770871	0.308409	0
131303	cg03803585	11	70427283	R	SHANK2	Body			19	0.027301	0.027301	0.692499	-1.44405	apple down vs pear	-0.225554	5.97868	0.209484	0.525577	1	0.791142	0.784311	0.48219	0.410542	0.491265	0.751258	0.435733	0.0540716	0.761985	0.476199	0.440125	0.799429	0.441951	0.776407	0.744782	0.757434	0.815234
78965	cg02275226	11	134608598	R			S_Shelf		50	0.0273031	0.0273031	1.38536	1.38536	apple up vs pear	0.216496	5.9785	0.192996	0.484224	1	0.481172	0.848746	0.832212	0.771249	0.841605	0.735427	0.416378	0.824972	0.820687	0.746341	0.740291	0.84193	0.836704	0.678385	0.690534	0.526618	0.082343
529296	cg15974300	21	36530136	F					1	0.0273618	0.0273618	1.52304	1.52304	apple up vs pear	0.268466	5.97314	0.296774	0.745271	1	0.818799	0.180802	0.853899	0.882519	0.777416	0.729458	0.864153	0.649953	0.805008	0.75318	0.767174	0.685571	0.829576	0.743528	0.755236	0	0.314201
10448	cg00295418	8	2021420	R	MYOM2	Body			31	0.027543	0.027543	0.69457	-1.43974	apple down vs pear	-0.211403	5.95672	0.184023	0.463401	1	0.750591	0.709359	0.719927	0.748323	0.431042	0.685473	0.487758	0.425171	0.390965	0.388339	0.0508261	0.767411	0.74972	0.468031	0.435111	0.724405	0.720044
17996	cg00504897	9	95017588	R	IARS	Body			27	0.0278248	0.0278248	1.59145	1.59145	apple up vs pear	0.289975	5.93142	0.346234	0.875591	1	0.806254	0.293688	0.793143	0.741417	0.814389	0.78113	0.786147	0.743808	0.810777	0.733591	0.784213	0	0.81835	0.772104	0.790691	0.764696	0
369355	cg11008123	11	33097335	R	LOC283267	TSS1500			48	0.0278772	0.0278772	0.537139	-1.86172	apple down vs pear	-0.324336	5.92675	0.433151	1.09626	1	0.896392	0.872814	0.282746	0.785016	0.25564	0.828191	0.298826	0.358781	0.930391	0.236859	0.319261	0.882893	0.296608	0.275554	0.022985	0.805591	0.320335
456936	cg13764124	8	98783468	R					47	0.0279007	0.0279007	2.46832	2.46832	apple up vs pear	0.325552	5.92466	0.436404	1.10488	1	0.0881843	0.255885	0.371961	0.109254	0.754186	0.35876	0.343825	0.875507	0.458737	0.836272	0	0	0.825776	0.517733	0.723261	0.505366	0
28432	cg00797779	17	74097330	R	EXOC7	Body	N_Shelf		40	0.0279743	0.0279743	1.43681	1.43681	apple up vs pear	0.207258	5.91812	0.176878	0.448312	1	0.770357	0.053726	0.746624	0.364757	0.70138	0.64357	0.360123	0.768041	0.717859	0.725958	0.701863	0.45248	0.748393	0.616582	0.725895	0.593047	0.448037
772460	cg24506221	1	110230401	R	GSTM1	TSS200	Island	Unclassified_Cell_type_specific	36	0.0279973	0.0279973	3.31421	3.31421	apple up vs pear	0.264468	5.91608	0.288003	0.730219	1	0.0581492	0.213795	0.605959	0.106745	0.00886079	0.0913871	0.0915892	0.0253345	0.411723	0.173324	0.593421	0.125185	0.776028	0.430557	0.655532	0.0771705	0.142686
50865	cg01445325	7	74510954	F	GTF2IRD2B	5'UTR	S_Shore		22	0.0287708	0.0287708	0.724034	-1.38115	apple down vs pear	-0.215672	5.84863	0.19153	0.491218	1	0.709692	0.834851	0.780062	0.675925	0.558432	0.841702	0.541352	0.370946	0.642737	0.596981	0.7201	0.884524	0.790045	0.112224	0.410981	0.828168	0.830319
740760	cg23381664	6	33281712	R	TAPBP	Body	Island	Promoter_Associated	41	0.0289536	0.0289536	2.83668	2.83668	apple up vs pear	0.243079	5.83299	0.243302	0.62567	1	0.126066	0.114673	0.0485157	0.76188	0.302995	0.00235681	0.222089	0.20768	0.24625	0.541687	0.762096	0.128671	0.138491	0.332684	0.411985	0	0.332575
80595	cg02320265	2	160894	F					0	0.0295915	0.0295915	0.690187	-1.44888	apple down vs pear	-0.219473	5.77931	0.198341	0.514788	1	0.785835	0.796442	0.477163	0.515383	0.453626	0.79176	0.809102	0.761405	0.783463	0.511909	0.0625042	0.467121	0.465655	0.433352	0.424871	0.836914	0.471671
631481	cg19405842	1	2038661	R	PRKCZ	5'UTR	Island		17	0.029758	0.029758	0.508815	-1.96535	apple down vs pear	-0.243832	5.76552	0.24481	0.636917	1	0.382658	0.61832	0.643616	0.598457	0.13819	0.407494	0.383163	0.408258	0.0906491	0.0793754	0.0346951	0.390638	0.038527	0.0635217	0.430543	0.594047	0.698585
264543	cg07784451	10	8952817	R	LOC105755953	Body			14	0.0297934	0.0297934	0.514924	-1.94204	apple down vs pear	-0.362036	5.7626	0.539699	1.40483	1	0.871092	0.840052	0.0696053	0.0480688	0.550387	0.408149	0.771236	0.852914	0.146604	0	0.747037	0.797735	0.900088	0.528415	0	0.895326	0.640843
657550	cg20337029	15	101985922	R	PCSK6	Body			34	0.0298422	0.0298422	1.85614	1.85614	apple up vs pear	0.223653	5.75858	0.205967	0.536504	1	0.563937	0.0310428	0.539118	0.647747	0.384481	0.341838	0.131732	0.378295	0.611274	0.570489	0.43581	0.0375438	0.610542	0.0513815	0.619713	0.366616	0.355916
865865	rs2804694									0.0298433	0.0298433	2.72943	2.72943	apple up vs pear	0.372911	5.75849	0.572611	1.49157	1	0.020343	0.0230616	0.472131	0.860083	0.904679	0.478722	0.463297	0.887175	0.425212	0.440712	0.909124	0.462038	0.0153183	0.920791	0.0501513	0.0434979	0.0184266
420159	cg12624040	2	168675205	R	B3GALT1	5'UTR			46	0.0299383	0.0299383	0.708336	-1.41176	apple down vs pear	-0.231316	5.75069	0.220324	0.574688	1	0.821369	0.873751	0.494764	0.491621	0.528322	0.538526	0.818175	0.487027	0.827746	0.856901	0.520603	0.846113	0.463127	0.858284	0.0893658	0.812975	0.840737
323529	cg09581911	12	4699232	F	DYRK4	TSS200			0	0.0301756	0.0301756	0.689005	-1.45137	apple down vs pear	-0.213491	5.73132	0.187675	0.491184	1	0.786829	0.786336	0.473074	0.696422	0.45043	0.457034	0.772026	0.450109	0.487924	0.469391	0.444454	0.781313	0.0355646	0.780642	0.441842	0.449971	0.771823
238700	cg07009486	Y	21751149	F	TXLNGY	Body				0.0302045	0.0302045	2.58314	2.58314	apple up vs pear	0.261826	5.72897	0.282277	0.739077	1	0.304032	0.357275	0.357114	0.517631	0.690311	0.234595	0	0.12821	0.368474	0.716231	0.784437	0	0	0.416509	0.293184	0.261787	0
166034	cg04841583	6	32620376	F					15	0.0303039	0.0303039	0.648208	-1.54271	apple down vs pear	-0.272869	5.80637	0.293177	0.706893	1	0.798865	0.796124	?	0.673807	0	0.695494	0.782276	0.690036	0.130053	0.606599	0.600615	0.810813	0.256237	0.817623	0.750108	0.753567	0.792452
396229	cg11857805	14	100441223	R			S_Shelf		38	0.0304464	0.0304464	1.56863	1.56863	apple up vs pear	0.268674	5.70943	0.297236	0.780909	1	0.887443	0.0290226	0.864035	0.777959	0.579416	0.753184	0.538746	0.862768	0.846705	0.773655	0.500833	0.487729	0.529652	0.841597	0.83504	0.508133	0.103185
865879	rs6626309									0.0307032	0.0307032	2.26139	2.26139	apple up vs pear	0.275934	5.68889	0.313515	0.826651	1	0.0244415	0.0142921	0.023928	0.476897	0.493824	0.456323	0.0147119	0.833539	0.447162	0.445227	0.869995	0.485702	0.482451	0.413288	0.460564	0.0645907	0.471215
309586	cg09157251	11	70733251	R	SHANK2	Body			11	0.0307262	0.0307262	0.572959	-1.74533	apple down vs pear	-0.271222	5.68706	0.302899	0.798916	1	0.813847	0.797051	0.243256	0.741809	0.192483	0.0440453	0.734733	0.188981	0.653672	0.22738	0.402813	0.538517	0.285938	0.269106	0.433526	0.767275	0.750356
547969	cg16552926	Y	23694891	R			N_Shore			0.0308036	0.0308036	0.437723	-2.28455	apple down vs pear	-0.21849	5.76531	0.179018	0.434711	1	0.243683	?	0.121115	0.184956	0.0725228	0.453296	0.283535	0	0.554979	0.362302	0.04185	0.724628	0.212148	0.151035	0	0.2969	0.329444
294312	cg08691316	3	10730317	F					1	0.0315407	0.0315407	1.40124	1.40124	apple up vs pear	0.20853	5.62325	0.179054	0.477627	1	0.75644	0.778728	0.747329	0.674801	0.730686	0.259911	0.725964	0.726112	0.734865	0.695716	0.726285	0.708476	0.78609	0.761549	0.699034	0.195559	0.212941
781145	cg24805360	5	77930038	F	LHFPL2	5'UTR		Unclassified_Cell_type_specific	0	0.0317818	0.0317818	0.622052	-1.60758	apple down vs pear	-0.206007	5.60472	0.174748	0.467681	1	0.614965	0.631868	0.332648	0.382429	0.351108	0.235227	0.548557	0.385343	0.634921	0.284243	0.14382	0.504387	0.19139	0.0450612	0.639639	0.703572	0.576894
294836	cg08705587	8	66927236	F					0	0.0321253	0.0321253	1.54835	1.54835	apple up vs pear	0.272046	5.57861	0.304743	0.819407	1	0.828044	0.239988	0.86856	0.730308	0.383713	0.824556	0.795023	0.773904	0.845361	0.825226	0.798068	0.3714	0.826631	0.833651	0.79621	0.413809	0
354295	cg10528826	7	157571460	F	PTPRN2	Body	S_Shelf		1	0.0323642	0.0323642	1.47922	1.47922	apple up vs pear	0.270119	5.56064	0.300442	0.81045	1	0.80791	0.872646	0.883034	0.786952	0.818555	0.870178	0.828603	0.870397	0.802853	0.767427	0.845584	0.283773	0.898682	0.858649	0.80566	0.280309	0.00220167
309310	cg09148704	6	158750049	F	TULP4	Body			1	0.032507	0.032507	0.536236	-1.86485	apple down vs pear	-0.237805	5.54997	0.232858	0.629349	1	0.275303	0.739261	0.00890046	0.669255	0.415305	0.368763	0.210184	0.340136	0.143274	0.323663	0.0452673	0.702597	0.217021	0.226105	0.360745	0.675863	0.617436
203018	cg05941499	12	76956021	F			S_Shelf		0	0.0326163	0.0326163	0.573113	-1.74486	apple down vs pear	-0.222585	5.54185	0.204006	0.552178	1	0.361409	0.457398	0.343346	0.0907581	0.490718	0.671999	0.651024	0	0.131961	0.501858	0.310264	0.771734	0.401778	0.592392	0.125218	0.314012	0.422327
312862	cg09255886	1	23467060	R	LUZP1	5'UTR			32	0.0326545	0.0326545	1.46821	1.46821	apple up vs pear	0.241963	5.53901	0.241071	0.652836	1	0.466437	0.46525	0.853193	0.81493	0.861954	0.448066	0.850057	0.847072	0.472861	0.833621	0.800717	0.0830373	0.452125	0.82679	0.82413	0.44682	0.85777
831331	cg26584456	10	81114059	R	PPIF	3'UTR		Gene_Associated_Cell_type_specific	47	0.0327251	0.0327251	1.92156	1.92156	apple up vs pear	0.25145	5.53378	0.260346	0.7057	1	0.0414673	0.0530896	0.502647	0.417469	0.798239	0.48396	0.461534	0.772653	0.502561	0.571577	0.0324711	0.270896	0.538418	0.574091	0.532901	0.0482027	0.550822
377233	cg11258982	12	80030118	R	PAWR	Body			46	0.0328947	0.0328947	1.45606	1.45606	apple up vs pear	0.215664	5.52128	0.191515	0.520301	1	0.786217	0.00662603	0.744536	0.517817	0.681836	0.569685	0.678955	0.670003	0.708093	0.747671	0.793177	0.475943	0.467555	0.89498	0.659824	0.369894	0.422877
20275	cg00567916	9	135072008	F	NTNG2	Body	N_Shore		1	0.0334788	0.0334788	1.64584	1.64584	apple up vs pear	0.238	5.47879	0.233241	0.638574	1	0.68004	0.117068	0.669448	0.655992	0.684589	0.52259	0.680904	0.610995	0.650769	0.492263	0.537878	0	0.655397	0.635756	0.472034	0.0110083	0.567974
721003	cg22682682	8	57070217	F			S_Shore		17	0.033692	0.033692	3.42363	3.42363	apple up vs pear	0.203418	5.4635	0.170384	0.467787	1	0.0978848	0.0806707	0.0718964	0.513084	0.0308949	0.0150301	0.0737007	0.261068	0.632496	0	0.473375	0	0.147895	0.303531	0.439251	0.184165	0.136067
473616	cg14238671	13	54131576	F					1	0.033809	0.033809	1.64065	1.64065	apple up vs pear	0.299715	5.45515	0.369884	1.01707	1	0.856079	0.2588	0.837246	0.865681	0.808386	0.827637	0.747807	0.657572	0.922384	0.791811	0.82838	0	0.862514	0.811879	0.289562	0.153871	0.430592
862126	cg27639199	15	81666528	R	TMC3	TSS200			40	0.0338231	0.0338231	0.54019	-1.8512	apple down vs pear	-0.260851	5.45415	0.280179	0.770547	1	0.049708	0.77834	0.0472332	0.433239	0.0976238	0.495429	0.502118	0.0633266	0.0859779	0.502812	0.490129	0.782451	0.477248	0.390599	0.476325	0.635151	0.727921
171462	cg04998327	11	103453960	F					0	0.0338511	0.0338511	0.636344	-1.57148	apple down vs pear	-0.291521	5.45216	0.349936	0.962746	1	0.884252	0.886678	0.456583	0.519494	0.816591	0.851345	0.870301	0.0748315	0.485229	0.0843561	0.872224	0.400427	0.46749	0.414562	0.909818	0.902959	0.815511
855552	cg27415324	22	17901078	R			S_Shelf		18	0.0339551	0.0339551	1.49572	1.49572	apple up vs pear	0.255095	5.44478	0.26795	0.738184	1	0.821721	0.0544545	0.827899	0.578666	0.694063	0.760726	0.752313	0.909394	0.75913	0.823324	0.807087	0.76013	0.811973	0.704184	0.781192	0.145976	0.306851
403278	cg12080266	21	36060640	R	CLIC6	Body			30	0.0340309	0.0340309	1.44361	1.44361	apple up vs pear	0.242868	5.43942	0.242879	0.669774	1	0.880906	0.507884	0.907281	0.868802	0.826643	0.590564	0.0691897	0.877808	0.530789	0.808668	0.895693	0.466769	0.872076	0.483714	0.832042	0.452147	0.864925
381831	cg11403739	15	22923741	R	CYFIP1	5'UTR			41	0.0341485	0.0341485	0.467636	-2.13841	apple down vs pear	-0.232478	5.43112	0.222543	0.614633	1	0.202532	0.623026	0.116725	0.340427	0.542702	0.508541	0.316437	0.154234	0.0276694	0.126203	0.102358	0.864951	0.0820508	0.407334	0.142422	0.181177	0.360171
687708	cg21442528	12	1609034	F	LOC100292680	TSS1500			0	0.034154	0.034154	1.35977	1.35977	apple up vs pear	0.229843	5.43073	0.217526	0.600818	1	0.900771	0.49419	0.897134	0.838876	0.842341	0.840708	0.863862	0.870744	0.817357	0.884579	0.895746	0.429816	0.892295	0.89509	0.852862	0.0760039	0.866666
219550	cg06453798	1	199623012	F					0	0.0345613	0.0345613	1.53922	1.53922	apple up vs pear	0.274127	5.40228	0.309422	0.859143	1	0.809193	0.840435	0.789219	0.651537	0.825335	0.785252	0.551509	0.698832	0.873512	0.832573	0.71257	0.57221	0.757295	0.773278	0.910827	0	0
99568	cg02873093	8	132002814	R	ADCY8	Body			46	0.0347477	0.0347477	1.51134	1.51134	apple up vs pear	0.234337	5.38938	0.226117	0.629339	1	0	0.758447	0.730969	0.850518	0.711606	0.694449	0.648489	0.669608	0.62693	0.685664	0.662548	0.290684	0.675102	0.68112	0.632092	0.697286	0.118593
309946	cg09167828	2	11286089	R	C2orf50	3'UTR			47	0.0349599	0.0349599	1.57495	1.57495	apple up vs pear	0.292418	5.3748	0.352093	0.98262	1	0.88664	0.0276492	0.880276	0.517139	0.761049	0.905954	0.865899	0.774813	0.773563	0.888241	0.792974	0.422413	0.88302	0.889918	0.849133	0.368883	0.0827255
829153	cg26512469	13	113688268	R	MCF2L	Body	S_Shore		42	0.0350424	0.0350424	1.47654	1.47654	apple up vs pear	0.250084	5.36916	0.257527	0.71946	1	0.0993573	0.102582	0.825799	0.604345	0.585215	0.82637	0.833624	0.851005	0.849589	0.866633	0.834368	0.567264	0.883022	0.874779	0.574059	0.614575	0.629806
283483	cg08357313	Y	9161051	F	RBMY1A3P	TSS1500				0.0350822	0.0350822	2.03352	2.03352	apple up vs pear	0.219385	5.36645	0.198181	0.553945	1	0.340052	0.326564	0.255035	0.769831	0.668013	0.0506052	0.276554	0.288151	0.483865	0.55451	0.347629	0.492117	0.242781	0.477922	0.228814	0	0
147258	cg04277055	4	185749877	F			S_Shelf		0	0.0350834	0.0350834	1.78349	1.78349	apple up vs pear	0.328397	5.36636	0.444067	1.24125	1	0	0.875307	0.885405	0.862577	0.293734	0.80276	0.818717	0.73172	0.940112	0.719694	0.592442	0.175893	0.873067	0.818274	0.758444	0.08679	0.17458
331415	cg09829904	Y	2823782	F	ZFY	Body				0.0351798	0.0351798	2.00966	2.00966	apple up vs pear	0.206292	5.3598	0.175232	0.490406	1	0.120997	0.405029	0.323592	0.674315	0.533222	0.0772829	0.417608	0.440218	0.602634	0.0766506	0.496201	0.331448	0.335499	0.181954	0.441817	0.0778646	0
135695	cg03938532	15	55133091	F					0	0.0352088	0.0352088	1.36208	1.36208	apple up vs pear	0.215941	5.35783	0.192008	0.537553	1	0.869916	0.905066	0.917899	0.912422	0.772853	0.669459	0.369017	0.743239	0.796227	0.746477	0.71058	0.437838	0.909196	0.890229	0.724171	0.158946	0.764479
307538	cg09094710	2	11356189	R	ROCK2	Body			50	0.0354885	0.0354885	0.582624	-1.71637	apple down vs pear	-0.233267	5.33892	0.224055	0.629495	1	0.44541	0.791039	0.451098	0.420691	0.511988	0.482831	0.20319	0.278202	0.101923	0.128731	0.222549	0.656751	0.438361	0.683329	0.0193503	0.634732	0.698269
756566	cg23943944	5	116197864	R					40	0.0355675	0.0355675	1.77032	1.77032	apple up vs pear	0.306609	5.33362	0.387096	1.08865	1	0.489503	0.0517907	0.852879	0.521119	0.842524	0.825493	0.867663	0.717643	0.494419	0.921237	0.501496	0.0198961	0.504349	0.848576	0.84211	0.480729	0.0511075
642562	cg19793163	10	14452500	F					0	0.0356033	0.0356033	1.40316	1.40316	apple up vs pear	0.210876	5.33121	0.183106	0.51519	1	0.537173	0.517991	0.880328	0.813781	0.582987	0.533943	0.107799	0.854059	0.836882	0.564909	0.81688	0.904117	0.599074	0.875259	0.515219	0.52617	0.534242
54137	cg01543583	14	59947673	R	C14orf149	Body	N_Shelf		18	0.0361305	0.0361305	1.81722	1.81722	apple up vs pear	0.237618	5.29617	0.232492	0.658472	1	0.512384	0.0259152	0.542933	0.415703	0.516245	0.802422	0.135523	0.535268	0.491168	0.752716	0.434499	0.498964	0.518202	0.539874	0.537214	0.0373515	0.0227878
56416	cg01608425	12	133209653	R	POLE	Body			20	0.0362015	0.0362015	1.98637	1.98637	apple up vs pear	0.316835	5.2915	0.413347	1.17173	1	0.841016	0.223675	0.187639	0.554696	0.864142	0.320117	0.243533	0.37174	0.797409	0.892479	0.845746	0.11283	0.863633	0.875154	0.127851	0.232405	0.274922
189078	cg05519532	9	1989032	R					13	0.0363022	0.0363022	1.5604	1.5604	apple up vs pear	0.274014	5.28489	0.309169	0.877508	1	0.884886	0.0256343	0.883533	0.936236	0.84911	0.520128	0.842231	0.66399	0.472915	0.805283	0.905699	0.133196	0.486371	0.853723	0.772924	0.502051	0.514623
409439	cg12279734	4	174538350	F	MORF4	TSS1500			0	0.0364908	0.0364908	0.719403	-1.39004	apple down vs pear	-0.222267	5.27257	0.203423	0.578721	1	0.85892	0.833386	0.829442	0.569187	0.836762	0.790676	0.676489	0.462658	0.537	0.152439	0.728244	0.838299	0.826312	0.555976	0.200535	0.731821	0.815269
819439	cg26181139	6	31237770	F	HLA-C	Body	N_Shore		1	0.0365923	0.0365923	0.547312	-1.82711	apple down vs pear	-0.327179	5.26596	0.440779	1.25555	1	0.882536	0.305383	0.0186982	0.188118	0.280977	0.633941	0.87003	0.259052	0.382115	0.840826	0.804133	0.880089	0.315703	0.866071	0	0.874391	0.61287
476627	cg14323910	6	32628305	F	HLA-DQB1	Body	N_Shelf		1	0.0366692	0.0366692	0.619036	-1.61541	apple down vs pear	-0.236697	5.26098	0.230694	0.65775	1	0.635665	0.696936	0	0.63189	0.0619578	0.646121	0.645767	0.578001	0.270146	0.486397	0.681882	0.635864	0.0663033	0.432896	0.636679	0.611407	0.477429
374414	cg11173002	5	168302634	F	SLIT3	Body			1	0.0369246	0.0369246	1.81035	1.81035	apple up vs pear	0.220651	5.2445	0.200475	0.573388	1	0.224235	0.202427	0.676923	0.625711	0.244578	0.67176	0.228345	0.181856	0.647614	0.595375	0.40337	0.192848	0.221835	0.661364	0.670778	0.191531	0.194881
469311	cg14117320	11	17032483	R	PLEKHA7	Body	N_Shelf		2	0.0369424	0.0369424	0.614556	-1.62719	apple down vs pear	-0.276368	5.24335	0.314502	0.899717	1	0.797029	0.809758	0.800717	0.299726	0.587887	0.312901	0.693798	0.320174	0.129103	0.175478	0.800296	0.831075	0.808767	0.260147	0.224143	0.769992	0.804526
218371	cg06417478	19	12876846	R	HOOK2	Body	N_Shore	Unclassified_Cell_type_specific		0.0369579	0.0369579	2.0885	2.0885	apple up vs pear	0.205032	5.24236	0.173098	0.495287	1	0.454863	0.0770002	0.462043	0.482769	0.442059	0.0656424	0.113495	0.420465	0.650149	0.429363	0.46933	0.448544	0.436674	0.0650599	0.0760237	0.0619853	0.0970005
602013	cg18330031	5	113822205	R	KCNN2	Body			10	0.0369814	0.0369814	0.563589	-1.77434	apple down vs pear	-0.305878	5.24085	0.385251	1.10264	1	0.237107	0.904577	0.0438	0.880931	0.612164	0.467571	0.823107	0.268823	0.603653	0.507552	0.583328	0.85771	0.218686	0	0.231224	0.829861	0.786322
776086	cg24634455	4	2804854	F	SH3BP2	5'UTR			0	0.0372701	0.0372701	2.12442	2.12442	apple up vs pear	0.289383	5.22242	0.344823	0.990412	1	0.0739629	0.0840065	0.0645398	0.57672	0.751941	0.52401	0.518819	0.541157	0.741806	0.430849	0.749216	0.0997562	0.0777332	0.785726	0.747761	0.05452	0.446456
97745	cg02819655	2	178853377	R	PDE11A	Body			1	0.0372868	0.0372868	0.56123	-1.7818	apple down vs pear	-0.253074	5.22136	0.26372	0.757619	1	0.427479	0.727952	0.74266	0.460547	0.483019	0.424862	0.473612	0	0.0626614	0.489884	0.114417	0.742815	0.461308	0.42257	0	0.778351	0.462391
638524	cg19654323	10	135422453	F					1	0.0373553	0.0373553	0.518511	-1.9286	apple down vs pear	-0.235445	5.28967	0.207879	0.550187	1	?	0.716521	0.128995	0.41497	0.370691	0.303137	0.524869	0.230239	0.57374	0.0712819	0.140531	0.0617261	0.166531	0.233244	0.205269	0.709734	0.61798
484546	cg14548901	2	11430093	R	ROCK2	Body			24	0.0378026	0.0378026	0.56448	-1.77154	apple down vs pear	-0.275417	5.18885	0.312343	0.902926	1	0.553641	0.828185	0.592496	0.338605	0.413942	0.598354	0.253182	0.33974	0.272178	0.091806	0.0897465	0.869467	0.544518	0.886664	0	0.616992	0.706887
451358	cg13603318	17	63926873	R	CCDC46	Body			24	0.0379698	0.0379698	0.587192	-1.70302	apple down vs pear	-0.27896	5.17842	0.32043	0.928168	1	0.589968	0.897501	0.61986	0.799223	0.0703714	0.599427	0.579823	0.572978	0.103992	0.525027	0.0169199	0.601847	0.619525	0.594186	0.0459316	0.59375	0.868014
614035	cg18759144	4	108874039	R	CYP2U1	3'UTR			46	0.0382237	0.0382237	1.46556	1.46556	apple up vs pear	0.229109	5.16269	0.216139	0.627984	1	0.794007	0.295547	0.793179	0.599521	0.805906	0	0.665031	0.566131	0.891205	0.727908	0.571698	0.789172	0.870237	0.689022	0.697467	0.386847	0.514225
86821	cg02502145	2	39319447	R	SOS1	Body			35	0.0382299	0.0382299	0.342578	-2.91905	apple down vs pear	-0.289814	5.16231	0.34585	1.00493	1	0.043407	0.920089	0.0595139	0.556035	0.104636	0.0627524	0.102833	0.0906591	0.134202	0.137347	0.140337	0.582873	0.0450606	0.150791	0.0916167	0.799294	0.574589
398754	cg11938760	X	100350190	F	TMEM35	3'UTR	N_Shelf		0	0.0383363	0.0383363	1.38204	1.38204	apple up vs pear	0.231525	5.22693	0.201014	0.538405	1	?	0.545327	0.835823	0.864016	0.831203	0.881983	0.801167	0.810942	0.830091	0.81845	0.837959	0.89796	0.885867	0.871521	0.789635	0.456066	0.0536509
528155	cg15935227	7	157934685	F	PTPRN2	Body	N_Shelf		0	0.0383875	0.0383875	1.47437	1.47437	apple up vs pear	0.281984	5.15261	0.327414	0.953149	1	0.713635	0.0771474	0.655947	0.731969	0.917385	0.881145	0.912165	0.875584	0.915572	0.87846	0.925157	0.896139	0.945044	0.968685	0.95047	0.0451631	0.635713
392273	cg11738485	19	12877000	F	HOOK2	Body	Island	Unclassified_Cell_type_specific	0	0.0392818	0.0392818	2.33088	2.33088	apple up vs pear	0.295681	5.09842	0.359996	1.05914	1	0.605125	0.035225	0.569519	0.614009	0.637139	0.0743458	0	0.61306	0.786754	0.616224	0.607945	0.683811	0.603848	0.130012	0	0.0947773	0.0619027
415605	cg12479705	4	13893547	R					44	0.0397058	0.0397058	0.614733	-1.62672	apple down vs pear	-0.265012	5.07323	0.289187	0.855039	1	0.241093	0.799374	0.792209	0.672236	0.184132	0.817694	0.730555	0.153458	0.396809	0.302896	0.735742	0.767471	0.165269	0.182211	0.643576	0.743688	0.715184
180985	cg05276972	11	130482015	R					39	0.0398553	0.0398553	0.608775	-1.64264	apple down vs pear	-0.328406	5.06442	0.444091	1.31533	1	0.878256	0.898645	0.880451	0.766512	0.869739	0.885548	0.805369	0.607883	0.142621	0.857747	0.806507	0.769258	0	0.0886611	0.0901248	0.847367	0.791573
46220	cg01311227	Y	2709627	R	RPS4Y1	1stExon		Unclassified_Cell_type_specific		0.0399918	0.0399918	2.43412	2.43412	apple up vs pear	0.206822	5.05641	0.176135	0.522508	1	0	0.0972052	0.328434	0.100446	0.295102	0.0854301	0.251072	0.629278	0.240525	0.582709	0.429172	0.251521	0.238499	0	0.66622	0.265567	0.0587169
81681	cg02351082	5	179069308	F	C5orf60	3'UTR			1	0.0401699	0.0401699	0.523362	-1.91072	apple down vs pear	-0.270423	5.04601	0.301118	0.895117	1	0.154828	0.797452	0.184209	0.795522	0.555821	0.382666	0.72269	0	0.338541	0.257164	0.386262	0.767772	0.206189	0.180431	0.0651874	0.760429	0.385654
214876	cg06307915	16	57004888	R	CETP	Body			22	0.040197	0.040197	0.66315	-1.50795	apple down vs pear	-0.281433	5.04444	0.326137	0.969792	1	0.906012	0.906718	0.51173	0.578003	0.877649	0.518801	0.82805	0.0885393	0.803878	0.422464	0.842773	0.952596	0.0407399	0.518536	0.85621	0.8503	0.885922
180849	cg05273049	10	49765381	R	ARHGAP22	Body			46	0.0406474	0.0406474	0.297828	-3.35765	apple down vs pear	-0.288099	5.01839	0.341769	1.02155	1	0.0568356	0.0334298	0.0638249	0.0778401	0.132181	0.0879381	0.529397	0.101502	0.0829192	0.0925303	0	0.771477	0.0370223	0.634158	0	0.564853	0.828147
847668	cg27141807	3	140786844	R	SPSB4	Body	S_Shore		27	0.0406924	0.0406924	1.78603	1.78603	apple up vs pear	0.288705	5.0158	0.343208	1.02638	1	0.819108	0.0316259	0.777732	0.501656	0.815741	0.693661	0.787967	0.803646	0.771291	0.502009	0.531946	0.0561226	0.5406	0.547674	0.767728	0.068618	0.113979
132974	cg03855028	6	167805633	R					19	0.0409653	0.0409653	0.661047	-1.51275	apple down vs pear	-0.222805	5.00021	0.204408	0.613197	1	0.662351	0.713822	0.617307	0.687545	0.513516	0.605729	0.505628	0.649171	0.248409	0.587051	0.174079	0.850748	0	0.634387	0.233797	0.654292	0.608746
285294	cg08415053	5	135081478	F					0	0.0411826	0.0411826	0.391751	-2.55264	apple down vs pear	-0.331582	4.98787	0.452722	1.36147	1	0.0237762	0.786779	0.791403	0.245339	0.1194	0.111124	0.461056	0	0.562788	0.034947	0.0660475	0.864625	0.0299441	0.0851084	0.200623	0.739901	0.828736
794781	cg25295696	7	46019645	F					0	0.0417534	0.0417534	1.35082	1.35082	apple up vs pear	0.21389	4.95584	0.188379	0.570172	1	0.840527	0.458523	0.804617	0.804241	0.806442	0.806588	0.827274	0.813735	0.856799	0.77682	0.844375	0.85127	0.851037	0.844654	0.833037	0.432534	0.0510812
381897	cg11405538	5	3177877	F					26	0.0418177	0.0418177	1.65845	1.65845	apple up vs pear	0.311984	4.95226	0.400787	1.21395	1	0.959382	0.526991	0.915043	0.942207	0.841133	0.417014	0.568132	0.88176	0.913606	0.92486	0	0.437393	0.663982	0.944587	0.830834	0.0201581	0.38765
456453	cg13749548	14	75722495	R			N_Shelf		28	0.0420859	0.0420859	0.524056	-1.90819	apple down vs pear	-0.34317	4.93741	0.484917	1.47319	1	0.0350533	0.930724	0.620756	0.669995	0.754956	0.597294	0.887572	0.645889	0.0457986	0	0.266113	0.856591	0.00200573	0.595067	0.178018	0.853187	0.886787
780099	cg24769381	11	78052863	R	GAB2	Body			46	0.0423248	0.0423248	1.59364	1.59364	apple up vs pear	0.264782	4.92427	0.288687	0.879379	1	0.518498	0.527495	0.0350752	0.896486	0.862703	0.545707	0.477562	0.498629	0.842448	0.549512	0.869286	0.0477856	0.889723	0.849735	0.814561	0.532954	0.472234
209776	cg06147194	17	72860652	R	FDXR	Body	S_Shelf	Unclassified	24	0.0434847	0.0434847	1.32795	1.32795	apple up vs pear	0.204303	4.8617	0.171869	0.530275	1	0.836588	0.836726	0.862811	0.846943	0.821724	0.483025	0.81648	0.857358	0.810796	0.755148	0.877117	0.0776622	0.848369	0.76719	0.825302	0.839398	0.470931
39175	cg01105403	2	240723304	R					48	0.043728	0.043728	1.79423	1.79423	apple up vs pear	0.285721	4.84882	0.336151	1.0399	1	0.158637	0.18802	0.218513	0.787901	0.631895	0.815174	0.380713	0.75355	0.5116	0.330454	0.824867	0.089331	0.838073	0.858661	0.699165	0.779217	0.107134
507232	cg15260248	3	189829092	F	LEPREL1	5'UTR			0	0.0438799	0.0438799	1.51989	1.51989	apple up vs pear	0.237333	4.84082	0.231935	0.718685	1	0.726035	0.200251	0.68294	0.751112	0.800541	0.618006	0.808686	0.710614	0.445215	0.691504	0.681462	0.683644	0.727912	0.685648	0.761469	0.155337	0.00359874
294928	cg08708231	11	132992485	R	OPCML	Body			47	0.0439071	0.0439071	0.672019	-1.48805	apple down vs pear	-0.24513	4.8394	0.247424	0.766906	1	0.775313	0.798658	0.136386	0.680045	0.10884	0.797123	0.589016	0.758084	0.418736	0.538442	0.681643	0.767036	0.794622	0.783549	0.122267	0.738994	0.765598
158547	cg04613734	8	116663921	R	TRPS1	5'UTR	S_Shelf		25	0.0440068	0.0440068	0.692409	-1.44423	apple down vs pear	-0.225613	4.83417	0.209593	0.650349	1	0.496632	0.88163	0.486845	0.601531	0.602144	0.771506	0.892564	0.510636	0.592529	0.49263	0.529504	0.842952	0.855577	0.407318	0	0.842401	0.406704
508578	cg15308688	22	23787391	R					42	0.0440382	0.0440382	1.39441	1.39441	apple up vs pear	0.228082	4.83252	0.214207	0.664891	1	0.443799	0.878846	0.894005	0.889834	0.782527	0.75304	0.872871	0.821481	0.636809	0.848419	0.730462	0	0.906141	0.842189	0.7119	0.674691	0.424813
722217	cg22723460	20	11188606	F					0	0.044311	0.044311	0.558052	-1.79195	apple down vs pear	-0.352887	4.8183	0.512769	1.59632	1	0.539282	0.915712	0.918521	0.521275	0.0550148	0.567121	0.877259	0	0.949127	0.477017	0.522768	0.908301	0.0271518	0.0421293	0.942939	0.878218	0.903479
233387	cg06855422	4	94566151	F	GRID2	Body			0	0.0444522	0.0444522	1.78688	1.78688	apple up vs pear	0.254238	4.81098	0.266152	0.829829	1	0.426799	0.0366931	0.452226	0.437604	0.768354	0.710078	0.405827	0.80137	0.751714	0.636145	0.39046	0.522885	0.729275	0.13148	0.674717	0.0750167	0.0843757
382154	cg11413762	12	133164904	F			N_Shelf	Unclassified_Cell_type_specific	1	0.0445151	0.0445151	1.3472	1.3472	apple up vs pear	0.218897	4.80773	0.197301	0.615573	1	0.256322	0.118372	0.887478	0.748895	0.831719	0.817207	0.803704	0.802822	0.921608	0.869073	0.830542	0.949593	0.862719	0.870966	0.867838	0.688243	0.779842
752006	cg23781398	13	25254512	F	ATP12A	TSS200	Island	Unclassified_Cell_type_specific		0.0453933	0.0453933	0.39901	-2.5062	apple down vs pear	-0.228067	4.76286	0.214178	0.674525	1	0.00505001	0.118253	0.0947565	0.325556	0.235814	0.663001	0.102497	0.279291	0	0.246037	0	0.584635	0.0285855	0.289348	0.0148017	0.512706	0.670262
785366	cg24951781	5	132114055	R	2019-09-08	TSS1500	S_Shore		7	0.0455658	0.0455658	1.413	1.413	apple up vs pear	0.207822	4.75417	0.177842	0.561112	1	0.714794	0.779623	0.69244	0.698188	0.755468	0.675393	0.737444	0.7313	0.716591	0.738189	0.668843	0.0246946	0.726636	0.731711	0.650855	0.418104	0.172346
579130	cg17533960	13	51826043	F	FAM124A	Body	Island		1	0.0456759	0.0456759	1.3616	1.3616	apple up vs pear	0.234321	4.74865	0.226086	0.714158	1	0.90123	0.114024	0.914258	0.861674	0.833622	0.973167	0.217742	0.828062	0.868099	0.878979	0.928566	0.681011	0.90208	0.900019	0.907954	0.834814	0.814083
555156	cg16769658	1	166968814	F	MAEL	Body			0	0.045823	0.045823	1.69019	1.69019	apple up vs pear	0.22536	4.74128	0.209123	0.661601	1	0.119659	0.137515	0.498487	0.499217	0.515508	0.197957	0.674528	0.478696	0.677018	0.768591	0.843272	0.499506	0.115801	0.474194	0.647976	0.169717	0.486734
266951	cg07856408	3	171540401	R					29	0.0461146	0.0461146	0.482394	-2.073	apple down vs pear	-0.399689	4.72677	0.657799	2.08747	1	0.103716	0.910507	0.0941231	0	0.874492	0.95492	0.802265	0.797615	0.117943	0	0	0.953928	0.11085	0.868983	0.860975	0.832314	0.847659
335726	cg09963080	16	4017270	F	ADCY9	Body	S_Shore		0	0.0465644	0.0465644	1.46727	1.46727	apple up vs pear	0.24615	4.7046	0.249488	0.79546	1	0.800178	0.799285	0.792736	0.915079	0.789693	0.869574	0.714483	0.816788	0.782397	0.738024	0.76122	0.15624	0.810432	0.830061	0.492935	0.171496	0.176248
522265	cg15748104	20	55636335	F				Unclassified_Cell_type_specific	0	0.0466481	0.0466481	1.68341	1.68341	apple up vs pear	0.219527	4.7005	0.198438	0.633245	1	0.614004	0.0445537	0.607213	0.655429	0.532686	0.524334	0.548277	0.573139	0.583102	0.607329	0.608434	0.352347	0.620325	0.555626	0.0642072	0.0751996	0.0898403
773396	cg24536782	8	216659	R			Island		27	0.0468536	0.0468536	1.55134	1.55134	apple up vs pear	0.212368	4.69047	0.185706	0.593883	1	0.219245	0.805599	0.798996	0.498689	0.477662	0.557007	0.065675	0.446225	0.763704	0.738662	0.741772	0.357236	0.561418	0.627701	0.320662	0.247592	0.443916
365964	cg10900271	7	156157852	F					1	0.0468953	0.0468953	0.659252	-1.51687	apple down vs pear	-0.27692	4.68844	0.315761	1.01023	1	0.832073	0.873589	0.839437	0.563843	0.149747	0.769836	0.773378	0.785964	0	0.746742	0.482254	0.920266	0.129038	0.852492	0.808116	0.702156	0.817485
450317	cg13574174	17	75944649	R					40	0.0469586	0.0469586	1.47056	1.47056	apple up vs pear	0.243999	4.68537	0.245145	0.784822	1	0.901932	0.571762	0.914805	0.526264	0.860194	0.538993	0.102398	0.499089	0.883954	0.853537	0.537685	0.189268	0.903474	0.826234	0.819994	0.500346	0.824972
428842	cg12908908	5	31106255	R					2	0.0478474	0.0478474	0.704036	-1.42038	apple down vs pear	-0.215121	4.64269	0.190552	0.61565	1	0.827676	0.872255	0.456403	0.607398	0.598584	0.523758	0.542957	0.512581	0.739656	0.788548	0.278677	0.570536	0.0342904	0.598553	0.502572	0.83998	0.910766
616899	cg18857647	11	46321235	R	CREB3L1	Body	S_Shelf		18	0.0478682	0.0478682	1.74758	1.74758	apple up vs pear	0.274181	4.64171	0.309545	1.00032	1	0.101946	0.208101	0.833108	0.811812	0.685981	0.701191	0.017954	0.0665711	0.721135	0.705732	0.744525	0.486797	0.852728	0.285901	0.70188	0.604933	0.446371
248090	cg07284498	16	59503402	F					0	0.0481453	0.0481453	1.38129	1.38129	apple up vs pear	0.202879	4.6286	0.169481	0.549242	1	0.739032	0.792264	0.741163	0.699472	0.781419	0.777916	0.481539	0.739436	0.7452	0.76719	0.763231	0.117205	0.775701	0.643314	0.69349	0.129232	0.687393
827913	cg26469782	4	4117213	R			N_Shelf		32	0.0481886	0.0481886	1.69949	1.69949	apple up vs pear	0.238285	4.62656	0.233799	0.758011	1	0.597575	0.0607114	0.578727	0.52692	0.587877	0.608009	0.75698	0.195444	0.785834	0.613434	0.574344	0.111111	0.603381	0.575925	0.747499	0.112522	0.137665
290390	cg08570077	7	1245797	R					22	0.0482701	0.0482701	0.656599	-1.523	apple down vs pear	-0.282619	4.62272	0.328891	1.0672	1	0.904353	0.915572	0.168322	0.920883	0.181677	0.828655	0.877734	0.868202	0.604246	0.821408	0.14592	0.83082	0.624884	0.839684	0.228576	0.885861	0.518
359429	cg10690713	22	23870527	F					1	0.0485107	0.0485107	0.521236	-1.91852	apple down vs pear	-0.265525	4.61145	0.290309	0.944309	1	0.0942635	0.615649	0.082601	0.579331	0.0626289	0.611534	0.6338	0.0820038	0	0.597191	0.62186	0.612553	0.634839	0.160865	0.0694773	0.668251	0.646182
468897	cg14104700	13	21889774	R			N_Shelf		31	0.0487329	0.0487329	0.699974	-1.42862	apple down vs pear	-0.230625	4.60109	0.219009	0.713991	1	0.827753	0.818888	0.721502	0.75627	0.279857	0.646227	0.801779	0.72329	0.858093	0.591783	0.452978	0.782819	0.186223	0.746238	0.0643589	0.702676	0.800648
9702	cg00272582	Y	2802965	R	ZFY	TSS1500	Island			0.0489715	0.0489715	1.92669	1.92669	apple up vs pear	0.220076	4.59003	0.199432	0.651734	1	0.262171	0.345132	0.129519	0.730318	0.685619	0.0599425	0	0.400822	0.374398	0.463233	0.376997	0.663717	0.337063	0.424132	0.653525	0.331445	0
176984	cg05160251	2	121068343	R					47	0.0490417	0.0490417	0.633323	-1.57897	apple down vs pear	-0.259831	4.64479	0.265829	0.801245	1	0.73811	0.772741	0.179735	0.661727	0.711954	0.555504	0.692561	0.743769	0.293321	0.720348	0.0710273	0.65353	?	0	0.657129	0.801873	0.745952
94867	cg02735334	X	46972146	R					2	0.0492117	0.0492117	0.670111	-1.49229	apple down vs pear	-0.20387	4.57897	0.171142	0.560637	1	0.668037	0.666824	0.219093	0.118918	0.515652	0.546202	0.56649	0.682561	0.582115	0.581843	0.668757	0.720399	0.0745498	0.148999	0.548779	0.547844	0.610183
208347	cg06101792	17	35401024	F	AATF	Body			1	0.0493184	0.0493184	0.616454	-1.62218	apple down vs pear	-0.278278	4.57407	0.318865	1.04567	1	0.862719	0.833179	0.152695	0.809487	0.405954	0.240684	0.72178	0.367657	0.34452	0.467995	0.226049	0.765665	0.0507462	0.9381	0.709413	0.877408	0.777343
822734	cg26294145	14	106086764	R					2	0.049589	0.049589	0.461429	-2.16718	apple down vs pear	-0.262502	4.5617	0.283735	0.93299	1	0.277542	0.726565	0.165134	0.732703	0.18815	0.215906	0.220807	0.140279	0.0976898	0	0.310391	0.726406	0.0093396	0	0.605341	0.560461	0.684142
563342	cg17037091	4	95519514	R	PDLIM5	Body			32	0.0496271	0.0496271	1.42876	1.42876	apple up vs pear	0.236208	4.55997	0.229741	0.755733	1	0.848859	0.861905	0.859963	0.773926	0.725764	0.524972	0.185962	0.766358	0.848404	0.79573	0.920903	0	0.577341	0.774197	0.828623	0.707918	0.726773
145631	cg04229575	4	157512736	F					1	0.0497951	0.0497951	0.73568	-1.35929	apple down vs pear	-0.208917	4.55234	0.179721	0.592182	1	0.842212	0.796022	0.825084	0.447539	0.702869	0.873615	0.865881	0	0.501887	0.790429	0.564644	0.705123	0.796237	0.721577	0.464528	0.749108	0.700818
49762	cg01414116	12	130720805	R					1	0.0499636	0.0499636	0.650412	-1.53749	apple down vs pear	-0.21428	4.54472	0.189066	0.624018	1	0.602133	0.611732	0.599585	0.577155	0.651509	0.569396	0.634397	0.592958	0.429454	0.0461307	0.618184	0.623966	0.0538536	0.393521	0.0243507	0.71053	0.538497

## Sheet: Apple vs Pear in GF AT
Column #	Column ID	CHR	MAPINFO	Strand	UCSC_RefGene_Name.0	UCSC_RefGene_Group.0	Relation_to_UCSC_CpG_Island	Regulatory_Feature_Group	SNP_DISTANCE.0	p-value(Shape)	p-value(apple vs. pear)	MeanRatio(apple vs. pear)	FoldChange(apple vs. pear)	FoldChange(apple vs. pear) (Description)	Estimate(apple vs. pear)	F(Shape)	SS(Shape)	SS(Error)	F(Error)	201800249-01 (Intensity)	201800250-01 (Intensity)	201800251-01 (Intensity)	201800252-01 (Intensity)	201800253-01 (Intensity)	201800254-01 (Intensity)	201800255-01 (Intensity)	201800256-01 (Intensity)	201800257-01 (Intensity)	201800258-01 (Intensity)	201800259-01 (Intensity)	201800260-01 (Intensity)	201800261-01 (Intensity)	201800262-01 (Intensity)	201800263-01 (Intensity)	201800264-01 (Intensity)	201800265-01 (Intensity)
350781	cg10423996	3	194762035	R					1	4.99342e-06	4.99342e-06	3.16673	3.16673	apple up vs pear	0.464617	47.7205	0.888871	0.279399	1	0.0725709	0.457091	0.626376	0.746428	0.442653	0.117664	0.0326989	0.612106	0.751714	0.758881	0.690293	0.182423	0.699135	0.77581	0.687094	0.168133	0.470445
126942	cg03672679	Y	17567897	F			Island			1.09701e-05	1.09701e-05	6.37145	6.37145	apple up vs pear	0.341907	41.584	0.481354	0.173632	1	0	0.183376	0.36043	0.253051	0.303029	0	0.139073	0.284577	0.566373	0.348911	0.346438	0	0.602274	0.521888	0.468625	0.0949557	0.0281642
639989	cg19707454	7	6616677	F	ZDHHC4	TSS1500	N_Shore		4	2.51535e-05	2.51535e-05	1.68606	1.68606	apple up vs pear	0.216064	35.7784	0.192226	0.0805904	1	0.365401	0.30386	0.551634	0.476046	0.625077	0.213752	0.321698	0.467902	0.446763	0.49068	0.465585	0.384051	0.529581	0.544326	0.712372	0.293619	0.322149
360470	cg10723869	17	4019965	F	ZZEF1	Body			0	6.73187e-05	6.73187e-05	0.725807	-1.37778	apple down vs pear	-0.234543	29.6804	0.226513	0.114476	1	0.864209	0.843175	0.396857	0.774187	0.634741	0.900037	0.823965	0.50617	0.740061	0.638871	0.566628	0.808206	0.670407	0.653008	0.627578	0.86179	0.886375
756994	cg23958373	8	599963	F			Island		33	0.000116508	0.000116508	1.37437	1.37437	apple up vs pear	0.220744	26.6176	0.200644	0.113071	1	0.595053	0.56877	0.588328	0.863476	0.850123	0.759207	0.575301	0.862291	0.822509	0.848344	0.884178	0.53681	0.72128	0.823924	0.83934	0.49779	0.594516
195444	cg05715076	14	100075957	R				Unclassified	45	0.000130252	0.000130252	1.55121	1.55121	apple up vs pear	0.223968	26.0222	0.206547	0.11906	1	0.584519	0.275567	0.636576	0.619004	0.67321	0.462608	0.50998	0.613347	0.619763	0.648348	0.632456	0.495535	0.620659	0.596853	0.642621	0.268948	0.247058
377898	cg11281224	4	60001000	F					3	0.000155417	0.000155417	0.671002	-1.49031	apple down vs pear	-0.265568	25.0973	0.290402	0.173566	1	0.81445	0.854882	0.611742	0.4012	0.395026	0.576473	0.725518	0.574919	0.628263	0.61819	0.408406	0.871363	0.601001	0.600003	0.577583	0.935106	0.872613
344335	cg10220361	5	141105602	F						0.000195097	0.000195097	0.722537	-1.38401	apple down vs pear	-0.204457	23.9387	0.172128	0.107855	1	0.618845	0.764022	0.439081	0.599589	0.478268	0.791583	0.911338	0.602507	0.490692	0.550689	0.445839	0.623752	0.490844	0.637205	0.589512	0.72858	0.720035
260310	cg07652488	3	183546124	F			S_Shelf		0	0.000233209	0.000233209	0.680336	-1.46986	apple down vs pear	-0.233798	23.0542	0.225078	0.146445	1	0.712596	0.724928	0.686985	0.660502	0.387724	0.689504	0.743158	0.494421	0.504684	0.3506	0.427491	0.725475	0.652263	0.407496	0.403733	0.749127	0.77493
250634	cg07360877	10	57902114	R					29	0.000236126	0.000236126	0.615324	-1.62516	apple down vs pear	-0.247326	22.9934	0.251878	0.164315	1	0.461367	0.669417	0.419199	0.474348	0.34166	0.789138	0.524223	0.603278	0.425423	0.299637	0.34194	0.77559	0.38348	0.377346	0.289899	0.632047	0.648849
602205	cg18337393	13	41713740	F	LOC101929140	Body			11	0.000238673	0.000238673	0.738272	-1.35451	apple down vs pear	-0.200655	22.941	0.165786	0.1084	1	0.701658	0.77358	0.55529	0.438231	0.53667	0.886911	0.593908	0.538136	0.557455	0.605352	0.622646	0.860764	0.676634	0.649313	0.480275	0.801301	0.748463
89101	cg02568347	13	34071080	R	STARD13	Body			25	0.000284454	0.000284454	0.743877	-1.34431	apple down vs pear	-0.200201	22.0945	0.165038	0.112044	1	0.803151	0.838419	0.579423	0.503005	0.535461	0.723102	0.870135	0.622203	0.551593	0.676368	0.707383	0.856742	0.653567	0.584955	0.400626	0.666875	0.713194
865894	rs9839873									0.000337686	0.000337686	2.00953	2.00953	apple up vs pear	0.423408	21.2862	0.738188	0.520187	1	0.491012	0.0263732	0.79503	0.788734	0.825113	0.534948	0.587753	0.828131	0.92334	0.952762	0.843356	0.59752	0.59646	0.964573	0.910674	0.0551385	0.643121
403054	cg12074150	2	34128722	R					42	0.00035463	0.00035463	0.26398	-3.78816	apple down vs pear	-0.520796	21.059	1.11682	0.795496	1	0.481057	0.896701	0.142656	0.432748	0.0697929	0.124176	0.849717	0.0578879	0.127552	0.0239852	0.540097	0.814991	0.0533999	0.218961	0.200803	0.873528	0.912922
559354	cg16908938	2	11728079	R	GREB1	3'UTR			20	0.000396962	0.000396962	0.691065	-1.44704	apple down vs pear	-0.247788	20.5413	0.252818	0.184616	1	0.704075	0.842224	0.476017	0.508468	0.406388	0.781836	0.754947	0.497542	0.453197	0.784492	0.525696	0.800386	0.807952	0.558973	0.5241	0.858825	0.872195
627001	cg19240319	1	161427101	F			Island			0.000415274	0.000415274	2.02893	2.02893	apple up vs pear	0.213373	20.3365	0.187468	0.138275	1	0.140484	0.106672	0.43624	0.432415	0.379517	0.363461	0.164029	0.308801	0.305961	0.47855	0.504135	0.091016	0.479599	0.520555	0.361685	0.377328	0.20862
246429	cg07234876	8	600039	F			Island		25	0.000583916	0.000583916	1.45095	1.45095	apple up vs pear	0.261341	18.8288	0.281232	0.224044	1	0.545057	0.544951	0.581406	0.867407	0.9474	0.831793	0.567319	0.958743	0.792756	0.898556	0.952718	0.505336	0.669016	0.88357	0.857163	0.482963	0.579308
401059	cg12012426	4	1366463	R	KIAA1530	Body	Island		38	0.000663125	0.000663125	2.14303	2.14303	apple up vs pear	0.385683	18.2838	0.612507	0.502499	1	0.323569	0.297006	0.841839	0.836601	0.863387	0.305189	0.540841	0.483919	0.855191	0.413967	0.875246	0.254377	0.803926	0.372078	0.884909	0.486056	0.154922
490847	cg14737079	22	21309949	R	LOC101928891	TSS1500	N_Shore		51	0.000672149	0.000672149	0.391027	-2.55737	apple down vs pear	-0.486429	18.2265	0.974288	0.801818	1	0.80722	0.886451	0.399428	0.857143	0.0869695	0.772169	0.634121	0.342696	0.23096	0	0.341774	0.738142	0.716689	0.147742	0	0.852768	0.900509
862175	cg27640988	2	86850406	F	RNF103	5'UTR	Island	Promoter_Associated	25	0.0007243	0.0007243	3.84192	3.84192	apple up vs pear	0.27983	17.9113	0.322431	0.270023	1	0.148421	0.0925613	0.428664	0.350527	0.513349	0	0.0932835	0.118752	0.630536	0.517485	0.300572	0	0.158924	0.4509	0.313237	0.175928	0.179061
446086	cg13455704	13	36871754	R	C13orf38	Body	Island	Promoter_Associated	28	0.00073632	0.00073632	0.37331	-2.67874	apple down vs pear	-0.203128	17.8423	0.169898	0.142833	1	0.334597	0.419614	0.216527	0.119287	0	0.32954	0.300192	0.00892152	0	0.148783	0.150139	0.168831	0.348225	0.110132	0.10799	0.325875	0.390251
548094	cg16556401	3	192611032	R	MB21D2	Body		Unclassified	1	0.000776437	0.000776437	0.646835	-1.54599	apple down vs pear	-0.25543	17.621	0.268654	0.228693	1	0.692054	0.628316	0.48888	0.454858	0.483158	0.473544	0.660375	0.457021	0.402006	0.434902	0.455537	0.672765	0.483624	0.609047	0.409279	0.96605	0.969725
442237	cg13342259	17	39073015	R					1	0.000783339	0.000783339	2.62851	2.62851	apple up vs pear	0.358423	17.5843	0.528982	0.45124	1	0.132796	0.493374	0.486067	0.510106	0.734597	0.127959	0.0792	0.500515	0.490772	0.446389	0.404002	0.563078	0.767489	0.727593	0.717632	0.108151	0.0360947
304719	cg09005575	8	11732724	F					1	0.000803432	0.000803432	0.619118	-1.6152	apple down vs pear	-0.294745	17.4793	0.357719	0.306979	1	0.863181	0.717125	0.290729	0.411642	0.547403	0.603044	0.703655	0.480549	0.537955	0.67103	0.533132	0.871127	0.5475	0.646197	0.124893	0.82392	0.834883
331378	cg09829164	7	4918779	R	RADIL	5'UTR	N_Shelf		47	0.000851784	0.000851784	1.76874	1.76874	apple up vs pear	0.321573	17.2385	0.425802	0.370509	1	0.638648	0.213708	0.72826	0.678546	0.708678	0.711303	0.419429	0.623166	0.790387	0.810608	0.749938	0.596181	0.685086	0.844772	0.779401	0.143073	0.205838
391511	cg11716267	2	24367828	F	LOC375190	Body			0	0.000861297	0.000861297	0.399236	-2.50478	apple down vs pear	-0.344608	17.193	0.48899	0.426619	1	0.474079	0.512588	0.0972173	0.124509	0.116199	0.470969	0.483799	0.479547	0.520931	0.0924224	0.498192	0.745586	0.113422	0.112384	0.135261	0.791719	0.536574
724857	cg22819120	15	71433067	F	THSD4	TSS1500			1	0.000940104	0.000940104	1.35809	1.35809	apple up vs pear	0.213587	16.8364	0.187844	0.167355	1	0.674492	0.826979	0.773358	0.702165	0.890927	0.621793	0.495046	0.890668	0.794148	0.894077	0.682086	0.383167	0.828136	0.816605	0.828263	0.610381	0.563337
39968	cg01128039	20	1584666	R	SIRPB1	Body				0.00102747	0.00102747	5.01201	5.01201	apple up vs pear	0.273302	16.4788	0.307563	0.279962	1	0.0890187	0.057043	0.494413	0.210745	0.394704	0.0961026	0.145346	0.0733032	0.460567	0.413269	0.410531	0	0.40679	0.512854	0.0370483	0.0698307	0.0195047
585411	cg17749961	2	30669863	R	LCLAT1	TSS1500	N_Shore	Promoter_Associated	17	0.00114729	0.00114729	4.6729	4.6729	apple up vs pear	0.235831	16.041	0.229007	0.214145	1	0.0447617	0.0631966	0.296839	0.0942885	0.172413	0	0.164638	0.308716	0.338869	0.0626237	0.458686	0.0639352	0.396489	0.366804	0.504659	0.0885355	0.0243914
526951	cg15897435	4	78852682	F	MRPL1	Body			0	0.00121894	0.00121894	4.179	4.179	apple up vs pear	0.295673	15.8034	0.359976	0.341675	1	0.153902	0.0733111	0.177396	0.408132	0.347133	0.137507	0.0917014	0.54029	0	0.440038	0.402381	0.0556264	0.362297	0.683626	0.525523	0.108561	0.0304485
365314	cg10879348	2	109251064	R	LIMS1	5'UTR			49	0.00131609	0.00131609	0.584944	-1.70957	apple down vs pear	-0.241386	15.5055	0.239923	0.232102	1	0.631163	0.635867	0.419067	0.417111	0.405834	0.583509	0.47227	0.0464971	0.484083	0.362943	0.337488	0.598972	0.417655	0.442579	0.0686224	0.584048	0.565187
93897	cg02706652	16	23718262	F	ERN2	Body			0	0.00150905	0.00150905	1.78299	1.78299	apple up vs pear	0.309251	14.9817	0.393795	0.394277	1	0.401802	0.051173	0.694015	0.715216	0.696851	0.668614	0.426908	0.700384	0.719278	0.729054	0.702235	0.385726	0.71174	0.674873	0.698465	0.101297	0.729203
834821	cg26705599	13	111745598	R			Island		9	0.00159221	0.00159221	0.500202	-1.99919	apple down vs pear	-0.408515	14.779	0.687173	0.697449	1	0.844495	0.832615	0.0302343	0.450223	0.476817	0.821332	0.733502	0.0623106	0.847137	0.753248	0.477526	0.809242	0.42674	0.0948999	0.469321	0.82296	0.85738
174873	cg05096415	10	85985331	F	LRIT2	TSS200			0	0.00164514	0.00164514	2.41497	2.41497	apple up vs pear	0.368721	14.6562	0.559816	0.57295	1	0.531725	0.0459919	0.688752	0.424317	0.619257	0.6314	0.0306761	0.783914	0.687294	0.390307	0.657667	0.0357427	0.638719	0.647752	0.755083	0.0940061	0.454554
712132	cg22349483	10	11317590	R	CELF2	Body			2	0.00169992	0.00169992	0.368474	-2.7139	apple down vs pear	-0.398529	14.5337	0.653988	0.674972	1	0.482564	0.861073	0.428947	0.0605713	0.546892	0.416955	0.754342	0.344171	0.366625	0.249812	0.307925	0.28947	0	0.0203373	0	0.760859	0.85214
158547	cg04613734	8	116663921	R	TRPS1	5'UTR	S_Shelf		25	0.00170036	0.00170036	0.61931	-1.6147	apple down vs pear	-0.296961	14.5327	0.363119	0.374795	1	0.580654	0.869942	0.418581	0.533164	0.471679	0.787887	0.858175	0.450728	0.432557	0.663057	0.522271	0.861375	0.703016	0.534891	0.101045	0.939846	0.562542
183681	cg05355592	3	61594983	R	PTPRG	Body			3	0.00176189	0.00176189	2.02833	2.02833	apple up vs pear	0.41952	14.4004	0.724694	0.754866	1	0.846068	0.509799	0.842908	0.779287	0.764929	0.759718	0.585242	0.868187	0.836194	0.863406	0.813984	0.11325	0.832627	0.817009	0.856293	0.0120254	0.0296342
782715	cg24859648	20	17680544	F	BANF2	TSS200			0	0.00177231	0.00177231	0.379053	-2.63815	apple down vs pear	-0.300979	14.3786	0.37301	0.389131	1	0.384761	0.688847	0.132271	0.43552	0.125896	0.387635	0.403696	0.0257265	0.117629	0.426898	0.390225	0.374232	0.0570827	0.12122	0.00483948	0.435768	0.718027
776526	cg24649857	2	50671250	R	NRXN1	Body			16	0.00195291	0.00195291	2.17273	2.17273	apple up vs pear	0.329897	14.0211	0.448131	0.479417	1	0.458288	0.226633	0.625486	0.439449	0.604487	0.498366	0	0.624124	0.490036	0.663267	0.553718	0	0.599375	0.640955	0.871139	0.1743	0.611563
79223	cg02282391	21	47786494	R	PCNT	ExonBnd			47	0.00197854	0.00197854	0.50456	-1.98193	apple down vs pear	-0.383667	13.9734	0.606118	0.650647	1	0.800587	0.858829	0.102634	0.792037	0.596996	0.715765	0.785749	0.333544	0.497359	0.723338	0.391647	0.694499	0.143724	0	0.32601	0.743858	0.821483
469723	cg14129329	9	136769545	F	VAV2	Body			0	0.0021314	0.0021314	1.63572	1.63572	apple up vs pear	0.249296	13.703	0.255905	0.280127	1	0.680461	0.210372	0.571621	0.621423	0.718506	0.56015	0.464864	0.583637	0.653676	0.646763	0.49013	0.200098	0.626703	0.793862	0.708138	0.225121	0.403983
332546	cg09863391	17	65293896	R					49	0.00219788	0.00219788	0.584648	-1.71043	apple down vs pear	-0.271869	13.5922	0.304347	0.335869	1	0.475272	0.686065	0.445498	0.451569	0.0743717	0.674996	0.620668	0.426972	0.428756	0.640436	0.436782	0.663099	0.435466	0.0554789	0.431484	0.727755	0.733997
253123	cg07437923	16	4506231	R	DNAJA3	3'UTR			2	0.00220446	0.00220446	0.356234	-2.80714	apple down vs pear	-0.25572	13.5815	0.269265	0.297388	1	0.434772	0.479829	0.119302	0.091452	0.0584314	0.480842	0.141436	0.0480653	0.507823	0.329167	0.0832398	0.403508	0.0757542	0.0130124	0.0888059	0.402669	0.437524
480994	cg14449263	4	166428088	F					0	0.00222404	0.00222404	2.05961	2.05961	apple up vs pear	0.356728	13.5497	0.523992	0.580079	1	0.712158	0.0337248	0.772192	0.528723	0.807436	0.471835	0.507759	0.623999	0.774781	0.801677	0.516515	0	0.752634	0.810319	0.545618	0.164357	0.466793
57748	cg01648869	17	55689899	R	MSI2	Body			9	0.00240062	0.00240062	0.466337	-2.14437	apple down vs pear	-0.443071	13.2766	0.808342	0.913272	1	0.847811	0.923482	0	0.400179	0	0.949339	0.84825	0.759874	0.271093	0.297715	0.111075	0.596146	0.746966	0.528633	0.756207	0.743881	0.902804
822568	cg26287822	X	111621927	F	ZCCHC16	5'UTR	N_Shore		0	0.00241242	0.00241242	2.36886	2.36886	apple up vs pear	0.420998	13.2592	0.729809	0.825629	1	0.513599	0.0651771	0.66218	0.759704	0.803989	0.743842	0.626642	0.806154	0.819921	0.484834	0.398103	0.036921	0.801205	0.816909	0.932519	0.153219	0.0134764
389832	cg11663691	4	119759900	F			S_Shelf		0	0.00243597	0.00243597	3.67376	3.67376	apple up vs pear	0.398141	13.2247	0.652713	0.740335	1	0.549699	0.0461101	0.699168	0.543143	0.469089	0.117919	0.101036	0.00735125	0.487276	0.534644	0.546644	0.0438744	0.450699	0.794056	0.938398	0.109958	0.0737489
605552	cg18455878	12	48257326	F	VDR	Body			0	0.00250104	0.00250104	0.44446	-2.24992	apple down vs pear	-0.390734	13.1313	0.628655	0.718118	1	0.761073	0.838118	0.754239	0.388763	0.426181	0.420235	0.790111	0.42779	0.0684474	0.0743813	0.0867913	0.844966	0.385554	0.427884	0.0860458	0.87433	0.394561
294379	cg08693140	7	6653510	F			N_Shore		0	0.00257859	0.00257859	1.99868	1.99868	apple up vs pear	0.303916	13.0236	0.380327	0.438043	1	0.679608	0.431534	0.655971	0.650584	0.607167	0.0333622	0.0626317	0.718536	0.671149	0.40693	0.443348	0.114239	0.620423	0.663398	0.644827	0.421389	0.387457
459476	cg13837834	5	180728293	F						0.00259055	0.00259055	2.10799	2.10799	apple up vs pear	0.320924	13.0073	0.424086	0.489054	1	0.624875	0.146691	0.540991	0.497545	0.67784	0.455812	0.573454	0.701327	0.713278	0.530981	0.686386	0.124766	0.588807	0.431145	0.737392	0	0.101918
447881	cg13506281	13	29914200	R	MTUS2	Body	Island		25	0.00272207	0.00272207	1.79837	1.79837	apple up vs pear	0.316018	12.8337	0.41122	0.480632	1	0.709138	0.424829	0.67977	0.422029	0.814116	0.373567	0.378833	0.763075	0.829077	0.730827	0.842781	0.483762	0.416939	0.820395	0.799453	0.374824	0.0258436
159221	cg04636193	6	25506398	F	LRRC16A	Body			0	0.00272783	0.00272783	1.81361	1.81361	apple up vs pear	0.374975	12.8263	0.578968	0.677086	1	0.489697	0.0420038	0.889411	0.85487	0.870326	0.832019	0.78722	0.531162	0.863238	0.897715	0.942221	0.484238	0.844408	0.792741	0.872437	0.0894712	0.501494
742891	cg23460551	7	66325901	R						0.00286865	0.00286865	0.738992	-1.35319	apple down vs pear	-0.215002	12.9976	0.182014	0.196051	1	0.876153	0.810365	0.395845	0.610975	0.706369	0.783422	0.840841	0.556219	0.641843	?	0.747071	0.88999	0.39091	0.585413	0.84396	0.748961	0.816414
559029	cg16899969	3	143686617	R			N_Shelf		35	0.00296636	0.00296636	1.91177	1.91177	apple up vs pear	0.36301	12.5353	0.542607	0.649296	1	0.776255	0.042223	0.682588	0.686803	0.78269	0.708609	0.710101	0.698394	0.817453	0.775335	0.759392	0.134619	0.742483	0.861145	0.805193	0.285374	0.129785
552962	cg16702660	14	22361282	F					0	0.00300644	0.00300644	2.21747	2.21747	apple up vs pear	0.299065	12.489	0.368282	0.442327	1	0.100833	0.0603735	0.442564	0.447816	0.450487	0.0603952	0.436556	0.810541	0.728518	0.462743	0.481844	0.489637	0.468143	0.420165	0.734285	0.124052	0.447672
74202	cg02132058	3	170451961	R					44	0.00357702	0.00357702	0.714056	-1.40045	apple down vs pear	-0.217897	11.8976	0.195502	0.24648	1	0.697356	0.804098	0.426916	0.405503	0.393345	0.863265	0.635364	0.707135	0.689658	0.406714	0.400253	0.800903	0.552225	0.74793	0.711628	0.765867	0.767343
71395	cg02050847	Y	22918038	F	RPS4Y2	1stExon				0.00385503	0.00385503	2.40571	2.40571	apple up vs pear	0.252456	11.6473	0.262435	0.337976	1	0.293691	0.233178	0.711893	0.453429	0.442232	0.0201793	0.142903	0.372908	0.417103	0.379781	0.171976	0.25428	0.264687	0.432058	0.674423	0	0.312919
234365	cg06882249	16	880206	R					48	0.00403354	0.00403354	1.39603	1.39603	apple up vs pear	0.234575	11.4972	0.226576	0.295605	1	0.190597	0.679574	0.923405	0.76499	0.842965	0.775329	0.629574	0.748356	0.882975	0.81452	0.808018	0.740488	0.921588	0.751324	0.810792	0.442543	0.688123
463988	cg13967697	5	49733066	R	EMB	Body	N_Shelf		49	0.0040763	0.0040763	0.714131	-1.4003	apple down vs pear	-0.206519	11.7537	0.167935	0.20003	1	0.829253	0.744175	0.572458	0.667117	0.51852	0.870287	0.679694	0.534723	0.446449	0.213422	0.508595	0.72659	0.55862	0.623249	?	0.604086	0.60289
23930	cg00670176	6	118869048	F	PLN	TSS1500				0.00416981	0.00416981	0.72328	-1.38259	apple down vs pear	-0.205409	11.3877	0.173735	0.228845	1	0.826924	0.752196	0.624465	0.532613	0.590391	0.701996	0.830127	0.575722	0.231225	0.547572	0.309319	0.648478	0.628784	0.699055	0.629735	0.690541	0.745814
860672	cg27589309	1	244256545	R					8	0.00432296	0.00432296	0.687011	-1.45558	apple down vs pear	-0.240029	11.2693	0.237234	0.31577	1	0.736666	0.796636	0.368159	0.47998	0.687299	0.669363	0.788048	0.652158	0.350031	0.680914	0.777303	0.7925	0.260246	0.359348	0.653195	0.778517	0.806519
24760	cg00694096	4	31413716	R					24	0.00438321	0.00438321	0.729372	-1.37104	apple down vs pear	-0.206616	11.2241	0.175783	0.234919	1	0.807222	0.719373	0.454154	0.317579	0.746738	0.666204	0.705873	0.609819	0.635753	0.785617	0.436248	0.811198	0.468209	0.625422	0.489005	0.898759	0.735664
17453	cg00491047	14	23831177	R	EFS	Body	N_Shelf		2	0.00439779	0.00439779	2.54419	2.54419	apple up vs pear	0.421317	11.2132	0.730915	0.977748	1	0.18166	0.151057	0.88362	0.835313	0.704108	0.782269	0.139035	0.795979	0.821294	0.839017	0.806466	0.266075	0.375572	0.0560874	0.824112	0.303096	0.0866864
274420	cg08084984	16	17482912	F	XYLT1	Body			0	0.00444671	0.00444671	7.72972	7.72972	apple up vs pear	0.379193	11.1772	0.592065	0.794564	1	0.0473683	0.0556723	0.106234	0.0552382	0.485117	0.0671601	0.048171	0.0424196	0.428706	0.80974	0.738364	0.078669	0.418489	0.44757	0.82351	0.0696624	0.0277191
345820	cg10267609	Y	24453757	R	RBMY1F	TSS1500	N_Shore			0.00456837	0.00456837	2.03771	2.03771	apple up vs pear	0.240885	11.0893	0.238929	0.323188	1	0	0.288769	0.531334	0.200219	0.484151	0	0.296852	0.562387	0.564029	0.52818	0.379586	0.44039	0.480612	0.639756	0.359915	0.36634	0.232569
865882	rs715359									0.00459062	0.00459062	2.30979	2.30979	apple up vs pear	0.451917	11.0736	0.840943	1.13912	1	0.93677	0.0284209	0.938016	0.900477	0.96137	0.463698	0.499698	0.505506	0.482395	0.91789	0.975969	0.0133984	0.891875	0.469126	0.92685	0.455323	0.0179041
191163	cg05586384	10	64005030	F	RTKN2	Body		Unclassified_Cell_type_specific	3	0.00464637	0.00464637	4.65051	4.65051	apple up vs pear	0.209889	11.0344	0.181397	0.246588	1	0.0304721	0.0507316	0.409958	0.307345	0	0.143841	0	0.49319	0.44118	0.199815	0.288308	0.0726943	0.297878	0.0724825	0.163698	0.104733	0
808833	cg25794455	5	149595582	F					0	0.00468332	0.00468332	1.64999	1.64999	apple up vs pear	0.30652	11.0088	0.386871	0.52713	1	0.427937	0.0926815	0.779298	0.7586	0.762614	0.711729	0.755795	0.799192	0.770699	0.750208	0.811023	0.459774	0.797321	0.786581	0.765449	0.769668	0.0834678
78190	cg02252289	2	236737161	R	AGAP1	Body			30	0.00470618	0.00470618	0.735856	-1.35896	apple down vs pear	-0.215206	10.993	0.190704	0.260215	1	0.797837	0.888689	0.515975	0.818167	0.479658	0.608489	0.803684	0.778315	0.609314	0.457155	0.576328	0.867464	0.576881	0.391271	0.792193	0.858052	0.878909
104787	cg03020684	15	71532066	R	THSD4	Body			48	0.00475677	0.00475677	0.672742	-1.48645	apple down vs pear	-0.231496	10.9585	0.220666	0.302048	1	0.810225	0.457508	0.461389	0.464984	0.483572	0.784626	0.84199	0.403757	0.442765	0.435217	0.45325	0.797354	0.78252	0.40638	0.424998	0.43688	0.823067
6586	cg00180644	4	20664773	R					42	0.00498039	0.00498039	2.89731	2.89731	apple up vs pear	0.323646	10.8106	0.431309	0.59845	1	0.564197	0.0641164	0.705773	0.0354391	0.454	0.0992389	0.120269	0.617709	0.572927	0.474892	0.526215	0.346247	0.413796	0.433595	0.707923	0	0
444762	cg13419214	Y	6341961	R	TTTY8B	TSS1500				0.00500503	0.00500503	3.42834	3.42834	apple up vs pear	0.351104	10.7948	0.507598	0.705335	1	0.19701	0.301526	0.437441	0.160385	0.747698	0	0	0.816814	0.520428	0.368917	0.720459	0	0.511374	0.596595	0.0767848	0.421858	0.0917061
88962	cg02564175	16	57333902	R				Promoter_Associated	49	0.00503683	0.00503683	2.59387	2.59387	apple up vs pear	0.247508	10.7745	0.252248	0.351173	1	0.0376854	0.0139693	0.447332	0.487997	0.390616	0.4659	0.0624111	0.206941	0.208736	0.492764	0.53281	0.106065	0.46378	0.551929	0.245051	0.349664	0.0513176
92887	cg02675432	2	162208258	R	PSMD14	Body			26	0.00527469	0.00527469	0.568413	-1.75929	apple down vs pear	-0.362287	10.6272	0.54045	0.762827	1	0.933051	0.899697	0.786219	0.34164	0.359847	0.817855	0.700919	0.0892526	0.716167	0.774332	0.740332	0.808578	0.136272	0.1777	0.649666	0.839394	0.876517
361524	cg10759817	1	92101219	R	HSP90B3P	Body			50	0.00541355	0.00541355	0.675404	-1.48059	apple down vs pear	-0.257097	10.5447	0.272171	0.387166	1	0.825474	0.803011	0.357196	0.388583	0.786454	0.802893	0.757014	0.346514	0.782747	0.790048	0.376599	0.782505	0.379187	0.735631	0.406592	0.780045	0.793421
77253	cg02225060	4	189183987	R					34	0.00549319	0.00549319	0.667404	-1.49834	apple down vs pear	-0.266656	10.4985	0.292787	0.418327	1	0.634241	0.834883	0.444622	0.545208	0.617619	0.932503	0.721506	0.452236	0.44573	0.800012	0.7145	0.722957	0.576662	0.0948805	0.659381	0.921302	0.844795
307538	cg09094710	2	11356189	R	ROCK2	Body			50	0.00568214	0.00568214	0.512749	-1.95027	apple down vs pear	-0.323887	10.3918	0.431952	0.6235	1	0.564264	0.785491	0.488612	0.307908	0.559628	0.667198	0.260438	0.16609	0.278699	0.0393798	0.124534	0.744164	0.505514	0.667269	0.270724	0.847346	0.784158
652231	cg20139683	12	133250118	R	POLE	Body	Island		49	0.00569669	0.00569669	2.52049	2.52049	apple up vs pear	0.466246	10.3837	0.895116	1.29305	1	0.849028	0.887991	0.82158	0.211895	0.7992	0.200373	0	0.891406	0.839423	0.841804	0.809594	0	0.867336	0.852101	0.794536	0	0.2091
511443	cg15402732	5	640245	R	CEP72	Body	N_Shelf		43	0.00584197	0.00584197	1.37977	1.37977	apple up vs pear	0.227711	10.3046	0.21351	0.310797	1	0.840397	0.449852	0.859855	0.800745	0.840244	0.828001	0.851042	0.835069	0.85052	0.822857	0.851444	0.402929	0.780809	0.834802	0.796727	0.411835	0.413116
703130	cg22010143	8	143308329	F	TSNARE1	3'UTR			0	0.005958	0.005958	1.61979	1.61979	apple up vs pear	0.27942	10.2431	0.321487	0.470787	1	0.65678	0	0.880872	0.833029	0.75601	0.289607	0.614923	0.567408	0.734063	0.673846	0.565246	0.614258	0.610008	0.792621	0.889354	0.427282	0.552933
248817	cg07308158	2	97489870	F	CNNM3	Body			0	0.00604882	0.00604882	2.16815	2.16815	apple up vs pear	0.352459	10.1958	0.511525	0.752551	1	0.50303	0.049243	0.589554	0.482749	0.56973	0.720716	0.705825	0.546216	0.787023	0.713073	0.588156	0.0662123	0.755518	0.784129	0.725684	0.0332759	0.0337663
464789	cg13989295	17	57187728	R	SKA2	3'UTR	S_Shelf		1	0.00615481	0.00615481	3.57057	3.57057	apple up vs pear	0.317414	10.1417	0.41486	0.613596	1	0.0692306	0.0448865	0.137133	0.484625	0.468475	0.472333	0.095535	0.0679321	0.44655	0.81979	0.44906	0.0354655	0.328773	0.504161	0.702442	0.130719	0.0161901
343454	cg10195365	3	58071644	F	FLNB	Body			0	0.00635348	0.00635348	2.55976	2.55976	apple up vs pear	0.323302	10.0431	0.430394	0.642823	1	0.400214	0.031365	0.738946	0.659881	0.710639	0.0469298	0.424153	0.439365	0.687151	0.416001	0.422821	0.0781727	0.39991	0.730228	0.100842	0.449474	0.0206255
865869	rs3936238									0.00640266	0.00640266	0.410469	-2.43624	apple down vs pear	-0.438217	10.0192	0.790729	1.18382	1	0.480844	0.944481	0.0313733	0.491891	0.0612319	0.899387	0.492168	0.447715	0.930747	0.0335675	0.437712	0.465933	0.479458	0.0481085	0.0893415	0.943097	0.977411
274967	cg08101922	7	119909506	R			N_Shelf		13	0.00644138	0.00644138	1.61664	1.61664	apple up vs pear	0.212527	10.0005	0.185985	0.278963	1	0.380045	0.422873	0.375254	0.612625	0.633123	0.595129	0.386193	0.600211	0.476897	0.578792	0.611033	0.244799	0.372981	0.656084	0.654823	0.339361	0.0441843
865846	rs133860									0.00656713	0.00656713	3.10672	3.10672	apple up vs pear	0.346151	9.94086	0.493379	0.744471	1	0.481635	0.0251953	0.862323	0.069731	0.894056	0.0593102	0.460356	0.446891	0.486981	0.473299	0.473423	0.0439899	0.441284	0.48077	0.47583	0.0608416	0.0188271
618517	cg18918637	1	228607587	R			S_Shelf			0.00662816	0.00662816	0.751194	-1.33121	apple down vs pear	-0.200104	9.91235	0.164877	0.249503	1	0.844989	0.766544	0.371627	0.539923	0.537425	0.571477	0.902913	0.579844	0.578412	0.81824	0.603951	0.909104	0.832437	0.641792	0.537895	0.85929	0.775495
529296	cg15974300	21	36530136	F					1	0.00664601	0.00664601	1.64407	1.64407	apple up vs pear	0.307672	9.90408	0.389785	0.59034	1	0.73525	0.2601	0.733386	0.844903	0.773677	0.805557	0.246693	0.811431	0.753327	0.68556	0.842323	0.675712	0.755982	0.791662	0.861445	0.620571	0
561959	cg16995742	2	237992612	R	COPS8	TSS1500	N_Shore		14	0.00668828	0.00668828	2.28336	2.28336	apple up vs pear	0.36119	9.88457	0.537181	0.81518	1	0.134668	0.0551785	0.840456	0.612438	0.844439	0.468966	0.524352	0.673037	0.837231	0.517486	0.400404	0	0.676604	0.203744	0.820476	0.143805	0.643122
195083	cg05704942	1	19581542	R	MRTO4	Body	S_Shelf		1	0.00669346	0.00669346	0.515954	-1.93816	apple down vs pear	-0.325916	9.88219	0.437382	0.663894	1	0.778531	0.789161	0.774704	0.470818	0.455931	0.450689	0.762915	0.451235	0.469668	0.070093	0.0718161	0.736683	0.483425	0.107606	0.118712	0.755512	0.439728
287514	cg08482145	10	122493961	R	MIR5694	Body			50	0.00685026	0.00685026	0.720402	-1.38811	apple down vs pear	-0.226193	9.81112	0.210673	0.322093	1	0.814404	0.865903	0.646389	0.210957	0.658301	0.757886	0.810534	0.539736	0.320112	0.616358	0.630359	0.836913	0.82501	0.761301	0.619498	0.803998	0.773328
189469	cg05531409	3	131637172	R	CPNE4	5'UTR			19	0.00693375	0.00693375	0.643738	-1.55343	apple down vs pear	-0.293387	9.77403	0.354431	0.543939	1	0.866178	0.830016	0.516276	0.495582	0.012016	0.774723	0.904077	0.499231	0.706859	0.381831	0.825324	0.653434	0.63932	0.790811	0.434031	0.87281	0.863371
850742	cg27254225	Y	15811945	F			N_Shelf			0.00693987	0.00693987	7.50632	7.50632	apple up vs pear	0.252883	9.77133	0.263322	0.404227	1	0	0.0178255	0	0.34902	0.436046	0	0	0.494782	0.349429	0.549509	0	0	0.42336	0.0640679	0.251287	0.0721665	0.182079
597617	cg18173230	2	238207644	F					0	0.00697957	0.00697957	0.681927	-1.46643	apple down vs pear	-0.231648	9.75389	0.220956	0.339796	1	0.829644	0.728181	0.288647	0.686863	0.660211	0.553686	0.708651	0.377455	0.281845	0.688562	0.253909	0.759472	0.573751	0.658436	0.496699	0.785171	0.733194
89838	cg02589406	5	118372020	F					32	0.00698112	0.00698112	0.414013	-2.41538	apple down vs pear	-0.223725	9.75321	0.206099	0.316972	1	0.417296	0.172741	0.156893	0.214271	0	0.346736	0.607046	0.182711	0.398316	0.0635288	0	0.354916	0.199692	0.165937	0.199319	0.605278	0.168529
131522	cg03810198	17	74679597	F	MXRA7	Body		Unclassified_Cell_type_specific	0	0.00699188	0.00699188	0.256798	-3.8941	apple down vs pear	-0.333492	9.74851	0.457951	0.704648	1	0.433557	0.786698	0.0517465	0.0676323	0.0625855	0.079285	0.0531798	0.0391909	0.0791245	0.0847803	0.458043	0.482259	0.0798045	0.0765223	0.152884	0.460865	0.845217
653923	cg20205188	10	1251771	R	ADARB2	Body	N_Shore		34	0.00721443	0.00721443	0.533726	-1.87362	apple down vs pear	-0.294536	9.65299	0.357212	0.555079	1	0.62911	0.685532	0.475413	0.357188	0.377116	0.440659	0.630606	0.0246446	0.40177	0.682159	0.0832193	0.680821	0.62821	0.341724	0	0.631715	0.723318
206898	cg06060457	22	43157042	R					9	0.00740125	0.00740125	0.486018	-2.05754	apple down vs pear	-0.323295	9.57537	0.430376	0.674192	1	0.405384	0.445785	0.462757	0.0466491	0.72599	0.724271	0.669943	0.0524698	0.427105	0.0209571	0.0292634	0.68873	0.406592	0.414764	0.470508	0.729608	0.739286
29002	cg00814218	14	37445440	F	SLC25A21	Body		Unclassified_Cell_type_specific	0	0.00755697	0.00755697	2.49177	2.49177	apple up vs pear	0.314542	9.51238	0.407386	0.642404	1	0.463484	0.0489334	0.388087	0.401231	0.747929	0.44785	0.157651	0.461773	0.105073	0.816995	0.773072	0.159794	0.701414	0.39039	0.467969	0.13377	0.0644782
402081	cg12045035	15	37494029	F					0	0.00771925	0.00771925	1.82772	1.82772	apple up vs pear	0.319533	9.44829	0.420418	0.667451	1	0.853872	0.102675	0.654214	0.6683	0.668146	0.417714	0.580404	0.584487	0.629563	0.849418	0.657193	0.161804	0.657359	0.865979	0.821067	0	0.585807
709239	cg22237495	1	27964774	R			S_Shelf		46	0.00778254	0.00778254	1.50411	1.50411	apple up vs pear	0.253943	9.42371	0.265535	0.42266	1	0.686924	0.0545823	0.68238	0.542641	0.789202	0.47257	0.817931	0.805343	0.748377	0.793493	0.723222	0.501402	0.874044	0.873625	0.744549	0.459858	0.532945
613118	cg18727946	8	122697767	F					6	0.00794142	0.00794142	1.65811	1.65811	apple up vs pear	0.258483	9.363	0.275113	0.440745	1	0.468571	0.753221	0.529785	0.586842	0.693443	0.592691	0.171061	0.701593	0.547488	0.66592	0.592496	0	0.68073	0.772313	0.741891	0.387193	0.376637
170896	cg04982228	6	24458460	R	GPLD1	Body			2	0.00830627	0.00830627	5.98961	5.98961	apple up vs pear	0.272219	9.22871	0.305132	0.49595	1	0.0771519	0.0348536	0.0579612	0.476302	0.0401181	0.0045481	0.0999776	0.434035	0.418629	0.109776	0.419268	0.0672553	0.507681	0.71135	0.0926462	0.0840378	0.0140765
529243	cg15972370	7	144422234	F	TPK1	Body			0	0.00832309	0.00832309	1.66535	1.66535	apple up vs pear	0.331472	9.22268	0.452422	0.73583	1	0.892105	0.0410047	0.780511	0.76426	0.921089	0.80744	0.520053	0.80906	0.887504	0.926075	0.783181	0.532844	0.8213	0.778649	0.825002	0.0342103	0.65968
229777	cg06754542	8	128918941	R	PVT1	Body			37	0.00847865	0.00847865	1.77524	1.77524	apple up vs pear	0.365788	9.16759	0.550944	0.901454	1	0.873957	0.0671916	0.833623	0.683399	0.817023	0.824006	0.813592	0.911673	0.853874	0.862959	0.897577	0.0887052	0.895512	0.772044	0.848592	0.0953213	0.540103
711087	cg22309983	17	3497580	R	TRPV1	TSS1500			49	0.00850655	0.00850655	1.66884	1.66884	apple up vs pear	0.221167	9.15783	0.201415	0.329906	1	0.569755	0.0353415	0.472561	0.564029	0.545496	0.537286	0.490882	0.602893	0.563511	0.52066	0.553508	0.304769	0.490673	0.616189	0.588885	0.356468	0.0202108
99558	cg02872767	19	1525453	F	PLK5P	Body	Island		15	0.00858398	0.00858398	1.69014	1.69014	apple up vs pear	0.228157	9.13094	0.214346	0.35212	1	0.211583	0.546104	0.59896	0.568572	0.534807	0	0.607486	0.622614	0.568331	0.489373	0.539474	0.213047	0.588082	0.471687	0.605632	0.55054	0.185417
469112	cg14111685	2	242930205	R			Island		28	0.00872561	0.00872561	0.711401	-1.40568	apple down vs pear	-0.201465	9.08246	0.167128	0.276018	1	0.553031	0.728917	0.322853	0.717344	0.709593	0.725177	0.716983	0.325622	0.552875	0.567473	0.572334	0.697892	0.294027	0.586235	0.317801	0.699755	0.764812
417228	cg12531767	X	153644319	R	TAZ	Body	S_Shelf		16	0.00880124	0.00880124	0.402083	-2.48705	apple down vs pear	-0.297971	9.05694	0.365593	0.60549	1	0.350509	0.804637	0.170481	0	0	0.246557	0.301829	0.440929	0	0.223787	0.263316	0.490962	0.194888	0.322874	0.387498	0.881278	0.412667
436883	cg13170468	11	10531665	R					48	0.0091245	0.0091245	0.636286	-1.57162	apple down vs pear	-0.21932	8.95064	0.198064	0.331927	1	0.373783	0.769262	0.466824	0.468322	0.379861	0.434647	0.673758	0.444056	0.350384	0.318759	0.351677	0.31019	0.360067	0.318418	0.378442	0.807805	0.85156
805238	cg25664050	6	32522905	F	HLA-DRB6	Body			0	0.0091915	0.0091915	0.557009	-1.7953	apple down vs pear	-0.338757	8.92915	0.472526	0.793793	1	0.741107	0.723408	0.0742959	0.725966	0	0.857257	0.919133	0.599795	0.146813	0.543544	0.363276	0.728109	0.370417	0.728065	0.707304	0.854249	0.529669
593612	cg18037388	12	10150068	F	CLEC1B	Body			1	0.00923072	0.00923072	0.573058	-1.74502	apple down vs pear	-0.314873	8.91664	0.408245	0.686768	1	0.809691	0.734503	0.59861	0.61714	0.382663	0.47523	0.801662	0.291889	0.118523	0.666006	0.679052	0.718481	0	0.671247	0.201225	0.77324	0.849753
865873	rs5926356									0.00929172	0.00929172	0.472305	-2.11728	apple down vs pear	-0.381161	8.89733	0.598225	1.00855	1	0.518072	0.941394	0.409104	0.478147	0.476732	0.447229	0.486662	0.426978	0.0400581	0.887133	0.0301076	0.870873	0.0606896	0.505041	0.0975213	0.842408	0.949542
822734	cg26294145	14	106086764	R					2	0.00931162	0.00931162	0.492409	-2.03083	apple down vs pear	-0.271692	8.89105	0.30395	0.512791	1	0.380561	0.713444	0.225261	0.00235728	0.351193	0.376475	0.416527	0.210028	0.524133	0.497389	0.554978	0.567289	0.158278	0	0.11204	0.667346	0.625162
551994	cg16672940	10	52088596	F	SGMS1	Body			29	0.00936221	0.00936221	0.717039	-1.39462	apple down vs pear	-0.202023	8.87518	0.168055	0.284031	1	0.610212	0.717663	0.356852	0.46322	0.378951	0.676737	0.725164	0.504274	0.711204	0.677214	0.492844	0.83955	0.809237	0.338182	0.387418	0.786076	0.642338
440541	cg13288846	7	155234510	R					41	0.00943805	0.00943805	1.68265	1.68265	apple up vs pear	0.223123	8.85157	0.204992	0.347382	1	0.372918	0.0357012	0.605174	0.340884	0.57049	0.55828	0.362645	0.381164	0.644761	0.61891	0.641907	0.337499	0.550502	0.540646	0.605274	0.0824331	0.538465
14835	cg00417638	5	5586070	R					28	0.00949431	0.00949431	0.411711	-2.42889	apple down vs pear	-0.389877	8.83419	0.625901	1.06275	1	0.408608	0.704261	0.0608624	0.735289	0	0.354655	0.856851	0.0833621	0.694993	0.559946	0	0.79921	0.154331	0	0.439751	0.700355	0.815178
690005	cg21524061	4	38825551	R	TLR6	3'UTR			1	0.00957341	0.00957341	1.53929	1.53929	apple up vs pear	0.279448	8.80996	0.321553	0.547482	1	0.859468	0.468147	0.841866	0.871955	0.822942	0.843185	0.494138	0.841035	0.801144	0.494348	0.827944	0.454135	0.829511	0.790623	0.854906	0.0650888	0.443091
789429	cg25099095	6	156954565	R			S_Shelf		29	0.00962297	0.00962297	3.47218	3.47218	apple up vs pear	0.437893	8.7949	0.789561	1.34662	1	0.0584154	0.513306	0.54564	0.082114	0.911969	0.0137435	0.554452	0.872248	0.875407	0.890261	0.520913	0.0601856	0.0702316	0.486423	0.89501	0.015351	0.0244443
634342	cg19508435	11	28131980	F	METT5D1	5'UTR	Island	Promoter_Associated	31	0.0097265	0.0097265	4.58077	4.58077	apple up vs pear	0.204799	8.76371	0.172706	0.295604	1	0	0.00663954	0.313144	0.288425	0.184979	0	0	0.474413	0.326865	0.331493	0.249833	0	0	0	0.450784	0.244148	0.149572
572591	cg17330030	22	26142061	R	MYO18B	5'UTR			33	0.00994703	0.00994703	2.18537	2.18537	apple up vs pear	0.301348	8.69853	0.373926	0.644809	1	0.520612	0.187088	0.77196	0.335675	0.502598	0	0.705873	0.527769	0.644372	0.695792	0.532502	0	0.519371	0.62939	0.396275	0.365985	0
505925	cg15216357	2	24378924	F	FAM228B	Body			1	0.0100333	0.0100333	0.406365	-2.46084	apple down vs pear	-0.360379	8.67347	0.534771	0.92484	1	0.434086	0.834725	0.00177491	0.104791	0.802763	0.451319	0.186296	0.435478	0.359705	0.189659	0.0733225	0.718488	0.169019	0.330415	0	0.802926	0.821663
313726	cg09281805	7	4751840	F	FOXK1	Body			0	0.0101418	0.0101418	2.08608	2.08608	apple up vs pear	0.286403	8.64231	0.337758	0.586228	1	0.0628603	0.0516979	0.687533	0.0915715	0.724064	0.356792	0.430209	0.701537	0.431649	0.60912	0.479947	0.471486	0.666082	0.474793	0.634766	0.447191	0.0256833
43181	cg01221582	14	105695807	R	BRF1	Body			50	0.0101938	0.0101938	1.4989	1.4989	apple up vs pear	0.261753	8.62753	0.28212	0.490499	1	0.726057	0.0294482	0.750218	0.795668	0.757415	0.815531	0.811294	0.820681	0.759072	0.778261	0.825254	0.423802	0.849978	0.752696	0.774855	0.434586	0.431877
28717	cg00807008	2	122219913	R	CLASP1	Body			19	0.0103994	0.0103994	1.47085	1.47085	apple up vs pear	0.261171	8.56987	0.280865	0.491603	1	0.487942	0.558244	0.767432	0.861653	0.854123	0.850071	0.795333	0.801056	0.599125	0.949165	0.809441	0.492359	0.953787	0.762022	0.800665	0.065903	0.632884
560628	cg16950711	5	126944112	R					44	0.0106359	0.0106359	1.6098	1.6098	apple up vs pear	0.305298	8.50513	0.383793	0.676874	1	0.693244	0.0625938	0.797166	0.89354	0.848051	0.871699	0.76778	0.718553	0.7891	0.859512	0.768741	0.504459	0.827794	0.805909	0.751125	0.562241	0.0425404
135249	cg03924089	4	124509673	F					1	0.010657	0.010657	0.688473	-1.45249	apple down vs pear	-0.262344	8.49944	0.283395	0.500142	1	0.879674	0.812955	0.497958	0.572843	0.678965	0.746371	0.878211	0.463142	0	0.686818	0.647825	0.881495	0.687644	0.834321	0.728288	0.798626	0.897541
388634	cg11627968	7	139351108	F	HIPK2	Body			0	0.0109331	0.0109331	1.45282	1.45282	apple up vs pear	0.261265	8.42608	0.281069	0.500355	1	0.810291	0.0424188	0.749223	0.839027	0.824899	0.870801	0.761135	0.868716	0.797089	0.822541	0.80655	0.446087	0.871743	0.887413	0.91519	0.566268	0.541815
276919	cg08159412	4	142231036	F						0.0110239	0.0110239	1.71184	1.71184	apple up vs pear	0.334795	8.40241	0.461538	0.823939	1	0	0.830103	0.908622	0.751989	0.783632	0.150299	0.797212	0.805899	0.784919	0.792477	0.761215	0.265066	0.748502	0.861989	0.851925	0.351793	0.897778
377951	cg11282840	8	49057154	R					50	0.0110585	0.0110585	1.60459	1.60459	apple up vs pear	0.274883	8.39345	0.311132	0.556027	1	0.713546	0.445337	0.769861	0.436817	0.84128	0.71857	0.456208	0.7501	0.959993	0.848866	0.649419	0	0.724133	0.771055	0.543941	0.440986	0.407996
507834	cg15281606	2	238903310	F	UBE2F	Body			0	0.0111384	0.0111384	4.42225	4.42225	apple up vs pear	0.216322	8.37288	0.192687	0.345198	1	0.106798	0.0429347	0.140298	0.471711	0.0345883	0.117399	0.0600299	0.494197	0.367461	0.526438	0.145721	0.0497885	0.42395	0.104361	0.0866044	0.0413368	0.0241867
294836	cg08705587	8	66927236	F					0	0.0111499	0.0111499	1.64431	1.64431	apple up vs pear	0.30258	8.36994	0.37699	0.675613	1	0.76134	0.282836	0.831141	0.813131	0.452173	0.789936	0.77612	0.791032	0.831901	0.814537	0.774007	0.173303	0.7802	0.786871	0.847022	0.421201	0.0826144
396229	cg11857805	14	100441223	R			S_Shelf		38	0.0111847	0.0111847	1.75881	1.75881	apple up vs pear	0.327708	8.36105	0.442205	0.793331	1	0.743577	0.0372144	0.873186	0.875065	0.53185	0.787296	0.445702	0.880442	0.835144	0.866098	0.509108	0.511842	0.550873	0.854041	0.819977	0.48515	0.0123096
273597	cg08060988	8	6784259	R	DEFA6	TSS1500			44	0.0113126	0.0113126	0.657308	-1.52136	apple down vs pear	-0.261756	8.32863	0.282126	0.508113	1	0.768098	0.838836	0.500675	0.41391	0.204984	0.83544	0.567875	0.697481	0.170356	0.388146	0.889275	0.712561	0.474257	0.608501	0.673081	0.772147	0.851802
112808	cg03258421	2	242930747	F			S_Shore		0	0.0113788	0.0113788	1.50586	1.50586	apple up vs pear	0.300799	8.31202	0.372564	0.672334	1	0.953422	0.320698	0.94486	0.595204	0.974817	0.834845	0.931497	0.946885	0.87523	0.906942	0.915344	0.256472	0.934049	0.930344	0.930583	0.542711	0.322743
519139	cg15652532	2	30669759	R	LCLAT1	TSS1500	N_Shore	Promoter_Associated	25	0.0114444	0.0114444	2.20576	2.20576	apple up vs pear	0.227374	8.29567	0.212878	0.384921	1	0.23409	0.188015	0.207271	0.204774	0.194196	0.206456	0.229493	0.51682	0.512625	0.196005	0.47757	0.192551	0.486096	0.584115	0.780004	0.146721	0.122688
330338	cg09797202	10	102111107	R	SCD	Body	S_Shelf		4	0.0114475	0.0114475	0.699997	-1.42858	apple down vs pear	-0.223828	8.29491	0.20629	0.373043	1	0.771184	0.772989	0.324529	0.72638	0.630496	0.713582	0.607584	0.575232	0.725509	0.300462	0.425328	0.798059	0.743877	0.223547	0.54722	0.701016	0.858189
574420	cg17386048	10	79506439	R					46	0.0116732	0.0116732	1.49509	1.49509	apple up vs pear	0.226896	8.23949	0.211984	0.385916	1	0.626121	0.675225	0.704874	0.705849	0.700605	0.569856	0.668496	0.646131	0.759424	0.72169	0.733119	0.0155663	0.634893	0.599646	0.645602	0.318811	0.333937
638524	cg19654323	10	135422453	F					1	0.011794	0.011794	0.516898	-1.93462	apple down vs pear	-0.228227	8.21031	0.214479	0.391846	1	0.27482	0.656416	0.14265	0.121085	0.396706	0.269735	0.450013	0.204679	0.349061	0.273545	0.091214	0.24114	0.186791	0.339875	0.336323	0.766338	0.648479
469311	cg14117320	11	17032483	R	PLEKHA7	Body	N_Shelf		2	0.0118014	0.0118014	0.494599	-2.02184	apple down vs pear	-0.363911	8.20855	0.545305	0.996471	1	0.752035	0.816956	0.727342	0.224807	0	0.36152	0.709267	0	0.52568	0.482425	0.743734	0.730067	0.658355	0.0852131	0.113772	0.792488	0.877974
470308	cg14146491	7	1793263	R					48	0.0118588	0.0118588	0.666507	-1.50036	apple down vs pear	-0.220543	8.19481	0.200278	0.366595	1	0.757614	0.664743	0.53342	0.320055	0.536062	0.862571	0.691721	0.660688	0.546312	0.235818	0.410319	0.727829	0.319674	0.624792	0.220543	0.479405	0.445294
475891	cg14303457	Y	14537211	F			S_Shelf			0.0119364	0.0119364	0.411776	-2.4285	apple down vs pear	-0.245092	8.17638	0.247346	0.45377	1	0.183007	0.268128	0	0.210451	0.0961464	0.497679	0.776366	0.394955	0.249569	0.250856	0	0.415758	0.390784	0.110171	0.012788	0.518472	0.257238
817898	cg26128147	9	95023826	R	IARS	Body			40	0.0119979	0.0119979	1.42556	1.42556	apple up vs pear	0.241289	8.16185	0.23973	0.44058	1	0.74462	0.314244	0.827979	0.831319	0.863394	0.84129	0.752901	0.853526	0.821143	0.815539	0.815515	0.345438	0.734762	0.795591	0.72408	0.762696	0.207785
186790	cg05450204	18	66759844	F					0	0.0120348	0.0120348	1.44089	1.44089	apple up vs pear	0.25962	8.1532	0.277539	0.510608	1	0.777277	0.598833	0.946519	0.808136	0.85647	0.837122	0.506744	0.816627	0.800187	0.875735	0.86988	0.861757	0.796731	0.875469	0.839043	0.504291	0.0359955
213221	cg06255004	9	139580799	F	AGPAT2	Body	N_Shore			0.0124934	0.0124934	2.54335	2.54335	apple up vs pear	0.217204	8.04794	0.194261	0.362069	1	0.130675	0.175232	0.347857	0.242183	0.681292	0.0574789	0.220511	0.49403	0.526711	0.518574	0.303981	0.172824	0.0500886	0.258488	0.156197	0.0598759	0.168554
348147	cg10338539	Y	2655977	R	SRY	TSS200	N_Shore			0.0126228	0.0126228	1.96749	1.96749	apple up vs pear	0.203679	8.01904	0.170821	0.319529	1	0.146192	0	0.270685	0.343876	0.543315	0.323696	0.156629	0.707981	0.197144	0.247551	0.40486	0.278583	0.359301	0.523723	0.543578	0.33227	0.236287
211272	cg06193597	2	241896910	R					4	0.0126231	0.0126231	0.417805	-2.39346	apple down vs pear	-0.37225	8.01897	0.570584	1.06731	1	0.895263	0.673336	0.86539	0.0968195	0.229153	0.0827865	0.839498	0.135674	0.0317698	0.152912	0.187118	0.622675	0.229701	0.104226	0.63865	0.663327	0.698857
798356	cg25420101	5	76785615	R	WDR41	Body	N_Shelf		1	0.0128886	0.0128886	1.81364	1.81364	apple up vs pear	0.25968	7.96075	0.277668	0.523195	1	0.362606	0.285165	0.389033	0.290184	0.824695	0.320493	0.234689	0.852261	0.601892	0.255286	0.779247	0.530098	0.514378	0.789257	0.492134	0.290614	0.210433
415926	cg12489592	6	82469666	R					6	0.0131339	0.0131339	0.758772	-1.31792	apple down vs pear	-0.202299	7.90813	0.168514	0.319633	1	0.817597	0.825919	0.335422	0.726058	0.644859	0.851729	0.854202	0.407783	0.689478	0.9099	0.777738	0.883297	0.802832	0.631325	0.437834	0.811056	0.82655
131508	cg03809827	Y	15207352	F						0.013184	0.013184	2.62258	2.62258	apple up vs pear	0.286738	7.89753	0.338547	0.643011	1	0.0424223	0.145628	0.620943	0.446093	0.409719	0.662835	0	0.43426	0.726905	0.501597	0.352853	0	0.544267	0.102021	0.495894	0.386138	0
116353	cg03363161	3	147139184	F			Island		38	0.0133213	0.0133213	0.338768	-2.95187	apple down vs pear	-0.251304	7.86871	0.260045	0.49572	1	0.172186	0.30346	0.11327	0	0.24749	0.392379	0.319212	0.0249922	0.00760488	0.177756	0	0.365791	0.185318	0.531074	0	0.803998	0.303358
221659	cg06520095	16	66458043	R			N_Shelf		1	0.013328	0.013328	0.687009	-1.45558	apple down vs pear	-0.230942	7.86732	0.219611	0.418715	1	0.648933	0.891655	0.444858	0.486975	0.424769	0.822184	0.722708	0.479583	0.231886	0.770602	0.431867	0.472244	0.434044	0.851849	0.512701	0.720745	0.886518
629026	cg19311470	4	39460490	F	RPL9	TSS1500	Island	Promoter_Associated	0	0.0133824	0.0133824	3.48381	3.48381	apple up vs pear	0.35267	7.856	0.512136	0.977858	1	0.569184	0.0468375	0.886857	0.520953	0.475313	0.158007	0.0682929	0.907192	0.517527	0.47962	0.0341633	0.0551411	0.562483	0.0357115	0.526753	0.0742887	0.0221612
680148	cg21165045	7	142352951	R					26	0.0134548	0.0134548	2.04591	2.04591	apple up vs pear	0.248296	7.84102	0.253857	0.485633	1	0.171375	0.336804	0.730903	0.0929311	0.529085	0.212936	0.144145	0.575443	0.354464	0.867996	0.46902	0.369774	0.284121	0.545982	0.406994	0.163485	0.263263
787470	cg25026580	Y	22917384	R	RPS4Y2	TSS1500				0.0135793	0.0135793	2.90891	2.90891	apple up vs pear	0.247986	7.96365	0.230615	0.405418	1	0.298667	?	0.227879	0.669885	0.529539	0	0.321997	0.362074	0.361023	0.517516	0.367387	0	0.334407	0.409258	0	0.0313976	0.127399
381897	cg11405538	5	3177877	F					26	0.0137344	0.0137344	1.40491	1.40491	apple up vs pear	0.234044	7.78401	0.22555	0.434641	1	0.945664	0.650796	0.941364	0.754012	0.83794	0.427744	0.717736	0.963895	0.844933	0.910309	0.735732	0.54875	0.676886	0.92531	0.530188	0.382523	0.37288
115050	cg03325394	20	58406750	F	PHACTR3	Body			0	0.0138127	0.0138127	1.83016	1.83016	apple up vs pear	0.227464	7.76828	0.213046	0.411376	1	0.630584	0.373281	0.419648	0.397248	0.614159	0.403298	0.0749617	0.366398	0.622801	0.636254	0.400764	0.0438182	0.379929	0.548911	0.628518	0.0772919	0.314761
393694	cg11784298	6	32610971	R	HLA-DQA1	3'UTR			47	0.0138285	0.0138285	0.618797	-1.61604	apple down vs pear	-0.270769	7.76513	0.301889	0.583164	1	0.677266	0.783246	0.114303	0.533273	0.141589	0.694904	0.556434	0.69376	0.181628	0.614801	0.582529	0.747347	0.224865	0.547064	0.761504	0.767648	0.745262
501512	cg15074403	7	55141475	R	EGFR	Body			29	0.0138655	0.0138655	0.337497	-2.96299	apple down vs pear	-0.282335	7.75774	0.328229	0.634649	1	0.0794856	0.714597	0.0848693	0.423486	0.126185	0.0896509	0.447684	0.449865	0.0955395	0.0562165	0.0824997	0.478426	0.0496373	0.044288	0.0257056	0.443183	0.730118
815187	cg26033510	6	110147565	F					0	0.0138911	0.0138911	0.60464	-1.65388	apple down vs pear	-0.284369	7.75264	0.332977	0.644251	1	0.839501	0.904006	0.817488	0.433578	0	0.533689	0.521446	0.545602	0.506233	0.331385	0.489351	0.554212	0.517731	0.548201	0.159403	0.801785	0.880226
646673	cg19935756	4	47423779	R	GABRB1	Body	N_Shelf		36	0.0141764	0.0141764	2.33493	2.33493	apple up vs pear	0.334565	7.69657	0.460905	0.898267	1	0.721473	0.0540647	0.487611	0.105061	0.510251	0.110974	0.0275829	0.688924	0.772082	0.770301	0.781009	0.372089	0.677773	0.319098	0.739776	0.441633	0.0265465
816146	cg26069044	11	124613956	R	NRGN	Body	N_Shore		50	0.0142641	0.0142641	1.68732	1.68732	apple up vs pear	0.278715	7.67959	0.319867	0.624773	1	0.131443	0.53158	0.831922	0.525588	0.482225	0.511062	0.564402	0.537807	0.89351	0.820558	0.940672	0.520394	0.494321	0.483734	0.831905	0.0428819	0.536803
361194	cg10747483	19	55038290	F			Island		0	0.0142689	0.0142689	0.781282	-1.27995	apple down vs pear	-0.200981	7.67866	0.166326	0.324913	1	0.939187	0.94368	0.446015	0.837879	0.859208	0.935544	0.90423	0.301678	0.797386	0.825154	0.744539	0.835753	0.784011	0.806639	0.776742	0.931283	0.942668
677659	cg21075783	19	35485564	F					1	0.0144977	0.0144977	1.55582	1.55582	apple up vs pear	0.213319	7.63494	0.187373	0.368123	1	0.578865	0.30623	0.51804	0.549527	0.671652	0.543806	0.615999	0.625842	0.578046	0.525805	0.632197	0	0.610362	0.600923	0.658678	0.499333	0.142286
661589	cg20486651	6	167070296	R	RPS6KA2	Body			38	0.0145111	0.0145111	0.658269	-1.51914	apple down vs pear	-0.21884	7.63242	0.197198	0.387554	1	0.569793	0.656966	0.183431	0.401922	0.512999	0.306716	0.85251	0.317008	0.432236	0.632396	0.548051	0.729927	0.518047	0.202522	0.466861	0.778154	0.588645
663698	cg20566384	19	876604	F	MED16	Body	S_Shore		0	0.0146827	0.0146827	0.603661	-1.65656	apple down vs pear	-0.322258	7.60018	0.427619	0.843964	1	0.815717	0.874715	0.160377	0.916015	0.870715	0.7965	0.745078	0.494023	0.431049	0.0652559	0.766686	0.815778	0.137447	0.54365	0.52307	0.746748	0.897072
344211	cg10217052	6	32607174	F	HLA-DQA1	Body			0	0.0146913	0.0146913	0.63488	-1.5751	apple down vs pear	-0.282691	7.59857	0.329058	0.649578	1	0.714319	0.727709	0.314044	0.726139	0	0.734331	0.804979	0.720272	0.210936	0.760905	0.46848	0.857614	0.341656	0.722993	0.650073	0.777219	0.803511
283139	cg08346443	7	68527554	F					0	0.0147419	0.0147419	1.46864	1.46864	apple up vs pear	0.237087	7.58915	0.231455	0.457472	1	0.835914	0.418319	0.73308	0.749669	0.785761	0.35028	0.837744	0.833867	0.447935	0.894707	0.735674	0.428226	0.709658	0.740969	0.798601	0.429845	0.241005
832113	cg26615497	1	102463707	F	OLFM3	TSS1500			16	0.0149634	0.0149634	1.69889	1.69889	apple up vs pear	0.236603	7.54836	0.23051	0.458066	1	0.300761	0.58357	0.34189	0.486683	0.392445	0.260961	0	0.550682	0.640951	0.433393	0.798916	0.409732	0.59064	0.803758	0.71208	0.506023	0.308739
455221	cg13713155	4	3522139	R	LRPAP1	Body	S_Shore		44	0.0150823	0.0150823	2.01227	2.01227	apple up vs pear	0.216562	7.52676	0.193114	0.384855	1	0.499741	0.323445	0.40193	0.239274	0.422556	0.238735	0.196004	0.673641	0.332538	0.597233	0.488534	0	0.59809	0.314671	0.236529	0.0480541	0.191582
399187	cg11951968	6	18586559	R					2	0.0151827	0.0151827	1.60439	1.60439	apple up vs pear	0.261002	7.50867	0.280502	0.560357	1	0.739125	0.161011	0.625093	0.714248	0.672545	0.632487	0.615165	0.738369	0.707663	0.724442	0.63491	0.19302	0.710833	0.704665	0.695658	0	0.682078
189078	cg05519532	9	1989032	R					13	0.0152354	0.0152354	1.73688	1.73688	apple up vs pear	0.315657	7.49921	0.410279	0.820644	1	0.85963	0.0244677	0.847755	0.853939	0.726563	0.413579	0.695859	0.7577	0.517856	0.798529	0.856656	0	0.426102	0.821721	0.833417	0.505006	0.500027
189907	cg05546557	5	180646	F	PLEKHG4B	Body	N_Shore		0	0.0152564	0.0152564	1.64223	1.64223	apple up vs pear	0.269155	7.49547	0.298301	0.596963	1	0.687756	0.42184	0.708017	0.706344	0.734592	0.688482	0.681725	0.748728	0.704735	0.659699	0.686909	0.0632022	0.418099	0.755526	0.759824	0.377225	0.0134148
826532	cg26422465	1	3561008	F	WDR8	Body	Island		0	0.0152736	0.0152736	0.54135	-1.84724	apple down vs pear	-0.282292	7.49239	0.32813	0.656926	1	0.394075	0.735352	0.0419829	0.11149	0.055341	0.639997	0.683602	0.668585	0.432499	0.415525	0.0695774	0.445891	0.668831	0.427815	0.44027	0.685341	0.724125
658242	cg20364183	3	115758614	F	LSAMP	Body			0	0.0152985	0.0152985	0.687978	-1.45354	apple down vs pear	-0.206792	7.48796	0.176083	0.352733	1	0.67176	0.645832	0.667333	0.366665	0.349684	0.61145	0.626241	0.104624	0.329256	0.636154	0.637602	0.70392	0.389059	0.375247	0.703942	0.646248	0.733792
511542	cg15406319	17	40169518	R	DNAJC7	TSS1500	Island	Unclassified	11	0.0153632	0.0153632	2.49614	2.49614	apple up vs pear	0.21174	7.47648	0.184609	0.37038	1	0.00457229	0.0111498	0.238819	0	0.465807	0.256233	0.30439	0.323261	0.52175	0.41741	0.311863	0.375059	0.393143	0.506217	0.354366	0.0233565	0.0159078
145805	cg04234574	3	178986203	R	KCNMB3	TSS1500			41	0.0155855	0.0155855	1.58415	1.58415	apple up vs pear	0.242995	7.43742	0.243133	0.490357	1	0.625899	0	0.691345	0.640911	0.61297	0.642662	0.520456	0.661849	0.701951	0.597776	0.777721	0.718685	0.622729	0.677851	0.604644	0.202321	0.201836
639383	cg19687193	5	1809712	R	NDUFS6	Body			40	0.0159441	0.0159441	0.694171	-1.44057	apple down vs pear	-0.278257	7.37577	0.318817	0.648373	1	0.932767	0.945073	0.559381	0.879021	0.287996	0.964296	0.765303	0.580889	0.633528	0.927065	0.196333	0.911471	0.901533	0.480422	0.869698	0.869993	0.980002
817405	cg26111679	8	27220309	R	PTK2B	5'UTR			27	0.0159589	0.0159589	2.49034	2.49034	apple up vs pear	0.247079	7.37325	0.251374	0.511389	1	0.0901897	0.386891	0.0823589	0.399954	0.380466	0.393252	0.0865332	0.408085	0.0831261	0.366904	0.612138	0.051028	0.546672	0.611406	0.637543	0.0957438	0.0568685
409439	cg12279734	4	174538350	F	MORF4	TSS1500			0	0.0159785	0.0159785	0.663296	-1.50762	apple down vs pear	-0.265913	7.36993	0.291158	0.592593	1	0.729042	0.821941	0.734137	0.543216	0.752465	0.858207	0.746081	0.47574	0.545448	0.17234	0.795469	0.807234	0.66914	0.525671	0.0247754	0.700082	0.865686
299183	cg08839358	2	38528761	F	ATL2	Body			0	0.0160687	0.0160687	1.80627	1.80627	apple up vs pear	0.30304	7.35472	0.378137	0.771214	1	0.856586	0.0638773	0.812048	0.760096	0.538149	0.564478	0.583268	0.74738	0.816776	0.474656	0.798252	0.263277	0.375178	0.683195	0.783195	0.25538	0.0441009
215599	cg06330797	6	167195910	R	RPS6KA2	Body	N_Shore		40	0.0163182	0.0163182	1.64822	1.64822	apple up vs pear	0.306567	7.31311	0.38699	0.793758	1	0.514341	0.514177	0.819413	0.519986	0.873155	0.856499	0.0407181	0.845048	0.514348	0.819107	0.842083	0.808728	0.84779	0.859359	0.854721	0.0635598	0.512517
67337	cg01933473	1	11132637	F	EXOSC10	Body			1	0.0164311	0.0164311	0.68708	-1.45543	apple down vs pear	-0.25624	7.29454	0.270361	0.555951	1	0.804864	0.830657	0.393494	0.893622	0.322462	0.777011	0.907863	0.308995	0.502089	0.796535	0.827959	0.800608	0.412768	0.841256	0.327092	0.824709	0.78636
12973	cg00366190	19	33622942	R	WDR88	TSS200	Island		46	0.0165371	0.0165371	0.602604	-1.65946	apple down vs pear	-0.334591	7.27722	0.460976	0.950176	1	0.865588	0.879121	0.494819	0.923761	0	0.541708	0.862675	0.879699	0.83415	0.591589	0.17754	0.899499	0.419945	0.326697	0.425488	0.890135	0.954994
836287	cg26757229	11	102191336	R	BIRC3	5'UTR	S_Shelf		44	0.0165937	0.0165937	0.665734	-1.5021	apple down vs pear	-0.26299	7.26803	0.284792	0.587763	1	0.747312	0.884452	0.807834	0.704835	0.625072	0.764188	0.736075	0.425294	0.229896	0.529622	0.0153925	0.800384	0.658194	0.514113	0.727549	0.654395	0.920587
534712	cg16145187	17	53684393	R					48	0.0167921	0.0167921	1.97049	1.97049	apple up vs pear	0.296317	7.23609	0.361545	0.749462	1	0.150925	0.0294123	0.621764	0.72731	0.527569	0.47613	0.45729	0.763462	0.75317	0.425084	0.66965	0.115695	0.766631	0.75501	0.00680046	0.508228	0.399614
309586	cg09157251	11	70733251	R	SHANK2	Body			11	0.0169166	0.0169166	0.502892	-1.9885	apple down vs pear	-0.331586	7.21628	0.452733	0.941066	1	0.783928	0.828705	0.0812065	0.765034	0.272831	0.295466	0.734829	0.185979	0.798089	0.199844	0.333248	0.352491	0.137729	0.139529	0.440956	0.784572	0.889224
673520	cg20929984	5	143357621	F					1	0.0169695	0.0169695	1.81519	1.81519	apple up vs pear	0.26594	7.2079	0.291216	0.606036	1	0.512147	0.25175	0.899337	0.580749	0.594543	0.495162	0.74815	0.619387	0.423899	0.504432	0.746288	0.142717	0.533467	0.606533	0.413078	0.052495	0.0811987
117162	cg03388641	7	143771058	F	OR2A25	TSS1500			0	0.0169712	0.0169712	0.593115	-1.68601	apple down vs pear	-0.281191	7.20763	0.325575	0.677563	1	0.691202	0.776215	0	0.469565	0.57924	0.484739	0.587928	0.00297618	0.509555	0.414001	0.293064	0.84507	0.71677	0.404911	0.708826	0.820885	0.631532
504828	cg15178138	4	7279696	R	SORCS2	Body			27	0.0169899	0.0169899	1.64809	1.64809	apple up vs pear	0.284276	7.20468	0.332759	0.692798	1	0.671663	0.0350451	0.628713	0.785347	0.722395	0.747999	0.220998	0.722613	0.73605	0.713618	0.706355	0.668239	0.745142	0.70589	0.763	0.718753	0.00775323
451358	cg13603318	17	63926873	R	CCDC46	Body			24	0.0171022	0.0171022	0.54945	-1.82	apple down vs pear	-0.319296	7.18704	0.419794	0.876149	1	0.652901	0.908025	0.550654	0.840442	0.00712238	0.659927	0.581798	0.589077	0.0994642	0.580645	0.0395436	0.656033	0.524205	0.529395	0.133295	0.598371	0.903709
247217	cg07258983	18	42255459	F			N_Shelf		0	0.0172364	0.0172364	1.47354	1.47354	apple up vs pear	0.257999	7.16611	0.274084	0.57371	1	0.55104	0.059147	0.757683	0.905757	0.508142	0.838741	0.483682	0.771038	0.865012	0.848969	0.86903	0.499631	0.813699	0.854124	0.834883	0.480607	0.900996
4577	cg00123214	1	95703607	F	RWDD3	Body	S_Shelf		0	0.0176259	0.0176259	1.51681	1.51681	apple up vs pear	0.237435	7.10646	0.232135	0.489979	1	0.791127	0.442208	0.877028	0.781246	0.832646	0.466101	0.509572	0.789128	0.72627	0.441111	0.771815	0.0742031	0.76251	0.515299	0.471542	0.49908	0.433678
456936	cg13764124	8	98783468	R					47	0.0176324	0.0176324	2.29666	2.29666	apple up vs pear	0.306191	7.10548	0.386041	0.81495	1	0.00586614	0.275467	0.293234	0.562835	0.736122	0.189929	0.404587	0.686393	0.547315	0.941584	0	0	0.613452	0.462383	0.579967	0.530769	0.246348
702503	cg21986118	17	18683622	R	TVP23B	TSS1500	N_Shore		14	0.0178099	0.0178099	1.69817	1.69817	apple up vs pear	0.266666	7.0788	0.292809	0.620462	1	0.242824	0.410177	0.335832	0.711083	0.746136	0.135606	0.567508	0.836969	0.722404	0.811333	0.804899	0.787213	0.37017	0.674742	0.472578	0.238705	0.291609
382738	cg11431762	19	3571445	R	HMG20B	TSS1500	N_Shore		34	0.0178273	0.0178273	0.56345	-1.77478	apple down vs pear	-0.238399	7.07621	0.234022	0.496075	1	0.377219	0.703748	0.460995	0.426434	0.0374952	0.61563	0.414668	0.43065	0.501438	0.015126	0.416782	0.392841	0.396767	0.391299	0	0.635588	0.682985
646229	cg19921651	10	44494208	R					46	0.0178792	0.0178792	0.631625	-1.58322	apple down vs pear	-0.22444	7.06847	0.207419	0.440165	1	0.392261	0.65653	0.716956	0.020508	0.443836	0.658435	0.606499	0.456725	0.443789	0.356408	0.414229	0.668342	0.38382	0.0698721	0.542156	0.609244	0.673579
380618	cg11366142	8	103953989	R	AZIN1-AS1	Body			37	0.0178803	0.0178803	3.67056	3.67056	apple up vs pear	0.286838	7.0683	0.338785	0.718952	1	0.0484221	0.0337077	0.507349	0.0765429	0.0185157	0.0388569	0	0.811365	0.49923	0.522203	0.490405	0.476741	0.117962	0.475807	0.42308	0.13278	0.021346
596576	cg18137779	1	56163457	R					47	0.0179112	0.0179112	0.746778	-1.33909	apple down vs pear	-0.210475	7.06371	0.182411	0.387354	1	0.838204	0.903956	0.887062	0.804845	0.522844	0.712222	0.788695	0.491026	0.883259	0.46859	0.807443	0.879724	0.480883	0.508958	0.352221	0.827342	0.868174
318040	cg09413645	4	77933741	R	2019-09-11	Body			1	0.0179981	0.0179981	0.669814	-1.49295	apple down vs pear	-0.254362	7.05086	0.266413	0.566767	1	0.782353	0.791438	0.355296	0.622046	0.385511	0.720351	0.733701	0.409337	0.744025	0.730478	0.759773	0.729678	0.749075	0.404447	0	0.805013	0.829994
392273	cg11738485	19	12877000	F	HOOK2	Body	Island	Unclassified_Cell_type_specific	0	0.0180703	0.0180703	2.43622	2.43622	apple up vs pear	0.319593	7.04021	0.420576	0.896086	1	0.614425	0.0188202	0.530682	0.680277	0.652356	0.053276	0.191693	0.607915	0.879181	0.605923	0.595612	0.549917	0.621264	0.114833	0.133128	0.0971385	0.0323973
469513	cg14123034	18	6283067	R	L3MBTL4	Body	N_Shore		31	0.0183768	0.0183768	1.34157	1.34157	apple up vs pear	0.208361	6.99562	0.178764	0.383306	1	0.780951	0.572457	0.938876	0.810743	0.797078	0.739543	0.79991	0.887991	0.800572	0.83069	0.770713	0.128303	0.734593	0.756211	0.856276	0.751814	0.497115
564081	cg17061760	4	149145826	F	NR3C2	Body			0	0.0184306	0.0184306	0.626249	-1.59681	apple down vs pear	-0.248683	6.98788	0.254649	0.546623	1	0.632069	0.789584	0.450044	0.436879	0.46263	0.784587	0.102985	0.438728	0.443898	0.533968	0.419586	0.872657	0.472854	0.121075	0.387213	0.603527	0.872185
26077	cg00730761	6	101113084	R	ASCC3	Body		Unclassified_Cell_type_specific	1	0.0184845	0.0184845	2.17947	2.17947	apple up vs pear	0.250978	6.98016	0.259371	0.557374	1	0.388797	0.456737	0.488607	0.423134	0.729442	0.0264291	0.0967594	0.0632736	0.476998	0.42915	0.425555	0.444848	0.426944	0.720094	0.454471	0.0537203	0.0222308
616899	cg18857647	11	46321235	R	CREB3L1	Body	S_Shelf		18	0.0185747	0.0185747	1.98001	1.98001	apple up vs pear	0.333301	6.96728	0.457428	0.984806	1	0.446049	0	0.737011	0.77712	0.824918	0.877014	0.270281	0.207639	0.713559	0.794631	0.789525	0.133416	0.813486	0.287592	0.788526	0.493526	0.16041
131303	cg03803585	11	70427283	R	SHANK2	Body			19	0.0186126	0.0186126	0.710418	-1.40762	apple down vs pear	-0.219874	6.96189	0.199066	0.428906	1	0.750731	0.811131	0.512153	0.500304	0.536174	0.852068	0.509665	0.151554	0.751935	0.453115	0.453432	0.761258	0.453179	0.763225	0.819008	0.798102	0.832019
486920	cg14615128	7	6568678	F	GRID2IP	Body	N_Shore		0	0.0188735	0.0188735	0.647891	-1.54347	apple down vs pear	-0.263957	6.92513	0.286889	0.621408	1	0.560712	0.851003	0.635107	0.534084	0.389664	0.765836	0.776016	0	0.169548	0.772308	0.437922	0.770133	0.649203	0.5494	0.719638	0.631379	0.892429
208406	cg06103394	16	3018991	R	PAQR4	TSS1500	Island	Promoter_Associated	40	0.0189035	0.0189035	0.23135	-4.32245	apple down vs pear	-0.309009	7.04049	0.375978	0.747632	1	0.027433	0.908197	0.0656966	?	0	0.228469	0.297654	0.219386	0.0648388	0.0175747	0.19301	0.0585591	0.0957439	0	0.180807	0.73049	0.563305
347744	cg10326673	2	30669757	R	LCLAT1	TSS1500	N_Shore	Promoter_Associated	23	0.0193421	0.0193421	2.28855	2.28855	apple up vs pear	0.240878	6.86057	0.238916	0.522367	1	0.21921	0.162308	0.236795	0.221019	0.107781	0.18038	0.200263	0.532119	0.556147	0.141173	0.547683	0.258936	0.505103	0.58854	0.841795	0.181419	0.106045
348315	cg10344373	3	121902205	F	CASR	TSS1500	N_Shore		28	0.0196495	0.0196495	1.86683	1.86683	apple up vs pear	0.204443	6.81919	0.172106	0.378577	1	0.334896	0.342096	0.422612	0.466992	0.547403	0.370599	0.198481	0.370772	0.241006	0.399002	0.165882	0	0.734648	0.664695	0.389932	0.14553	0.259355
279675	cg08242338	Y	6114379	R	TSPY2	1stExon	Island			0.01979	0.01979	2.18929	2.18929	apple up vs pear	0.245161	6.80052	0.247487	0.545885	1	0.0704754	0	0.353476	0.65448	0.433837	0.45208	0	0.65208	0.288647	0.714096	0.424579	0.508006	0.31017	0.213401	0.468262	0.321065	0.0913646
279698	cg08243259	15	62951029	F	TLN2	Body			0	0.0198092	0.0198092	0.640387	-1.56156	apple down vs pear	-0.200577	6.79798	0.165657	0.365528	1	0.596094	0.59214	0.3798	0.380725	0.464539	0.326201	0.562926	0.531174	0.325971	0	0.524808	0.646956	0.501582	0.385045	0.0781578	0.599954	0.580026
782770	cg24861399	2	135072000	R	MGAT5	Body			12	0.0202227	0.0202227	0.457261	-2.18694	apple down vs pear	-0.236148	6.74398	0.229624	0.510731	1	0.391809	0.660659	0.165815	0.101921	0.0368311	0.392491	0.169432	0.386966	0.0760126	0.149783	0.647507	0.479824	0.334828	0.0337904	0.0561061	0.583586	0.367925
304182	cg08986950	5	96120312	F	ERAP1	Body			8	0.0204669	0.0204669	0.352354	-2.83805	apple down vs pear	-0.299421	6.71269	0.369158	0.824912	1	0.481575	0.829829	0.17102	0.0417089	0.0829699	0.0561333	0.496548	0.0553243	0.120505	0.0277745	0.0836995	0.782001	0.485906	0.0591326	0.500969	0.0991844	0.490981
443128	cg13370086	1	55260950	R	TTC22	Body			50	0.0205751	0.0205751	0.766031	-1.30543	apple down vs pear	-0.200273	6.69895	0.165157	0.369812	1	0.86171	0.908921	0.897129	0.563504	0.90296	0.836451	0.754	0.537248	0.544804	0.536775	0.465313	0.910453	0.864033	0.411555	0.833766	0.777011	0.943328
365964	cg10900271	7	156157852	F					1	0.0206409	0.0206409	0.672987	-1.48591	apple down vs pear	-0.269833	6.69064	0.299806	0.672146	1	0.844982	0.849979	0.702346	0.294003	0.109839	0.783843	0.726864	0.749976	0.389935	0.815554	0.32809	0.89647	0.465402	0.8535	0.844477	0.857461	0.816419
425339	cg12795959	20	1569403	F	SIRPB1	Body				0.020893	0.020893	1.87376	1.87376	apple up vs pear	0.201714	6.65909	0.16754	0.377395	1	0.487975	0.0913146	0.604912	0.25477	0.64794	0	0.273836	0.495753	0.362338	0.41115	0.48379	0.36018	0.492413	0.410275	0.16237	0.30482	0.0978778
579930	cg17560699	Y	15593045	F	UTY	TSS1500	S_Shore		36	0.021016	0.021016	2.22659	2.22659	apple up vs pear	0.270172	6.64386	0.300558	0.678578	1	0.221086	0.230858	0.492976	0.553192	0	0.260413	0.0691146	0.729415	0.450935	0.699135	0.448819	0.372568	0.784334	0.632541	0.112993	0.067493	0.320302
641579	cg19761267	5	34688210	F	RAI14	5'UTR			1	0.0210986	0.0210986	0.640632	-1.56096	apple down vs pear	-0.298046	6.63368	0.365776	0.827089	1	0.782098	0.847029	0.755974	0.662073	0.0476782	0.753422	0.746014	0.616998	0	0.697512	0.384939	0.886147	0.523948	0.842066	0.781956	0.907258	0.883553
96738	cg02788935	10	128824401	F	DOCK1	Body			0	0.0211773	0.0211773	1.44648	1.44648	apple up vs pear	0.239421	6.62404	0.236033	0.534491	1	0.548556	0.516175	0.844698	0.759205	0.883307	0.841363	0.764864	0.803341	0.603447	0.783104	0.828078	0.03569	0.817008	0.520381	0.914051	0.553632	0.493411
124429	cg03601053	Y	15016101	F	DDX3Y	5'UTR	N_Shore			0.0212682	0.0212682	2.49392	2.49392	apple up vs pear	0.237133	6.61294	0.231544	0.525207	1	0	0.0675506	0.488727	0.236725	0.124057	0.391381	0.0056652	0.620634	0.610687	0.265215	0.301084	0.480124	0.492417	0.258977	0.560131	0.166406	0
810814	cg25872828	18	68052588	F	LOC101060542	TSS1500			0	0.0214101	0.0214101	0.480077	-2.083	apple down vs pear	-0.333281	6.59573	0.457374	1.04016	1	0.587959	0.894644	0.103141	0.570272	0.0555138	0.553969	0.518362	0.503976	0.0943836	0.567377	0.159928	0.950458	0.495535	0.0893141	0.437947	0.0654722	0.916277
415321	cg12471283	5	107120132	R					4	0.0214371	0.0214371	1.48109	1.48109	apple up vs pear	0.240819	6.59246	0.238797	0.543342	1	0.557028	0.535481	0.874438	0.48104	0.727002	0.533423	0.431887	0.798703	0.816019	0.88546	0.622374	0.581028	0.902951	0.545509	0.760373	0.834509	0.0306204
112023	cg03234273	22	22425102	F					4	0.0215303	0.0215303	1.46408	1.46408	apple up vs pear	0.214477	6.69063	0.181127	0.379004	1	0.39902	0.551731	0.610463	0.53213	0.637933	0.638322	0.474901	0.797174	0.648053	?	0.663211	0.586262	0.604777	0.711783	0.884166	0	0.58485
214876	cg06307915	16	57004888	R	CETP	Body			22	0.0215809	0.0215809	0.636417	-1.5713	apple down vs pear	-0.312453	6.57518	0.401994	0.917071	1	0.895732	0.91589	0.53879	0.463081	0.817768	0.566369	0.893318	0.0957509	0.794597	0.485945	0.8396	0.907802	0.0371548	0.503509	0.893004	0.921628	0.914875
766760	cg24309011	21	44444757	F	PKNOX1	Body			0	0.0216077	0.0216077	1.58129	1.58129	apple up vs pear	0.252412	6.57198	0.262344	0.598777	1	0.478517	0.649827	0.452951	0.850786	0.770023	0.256759	0.127081	0.565148	0.746207	0.790857	0.406844	0.825241	0.82554	0.679706	0.778331	0.220565	0.481598
845698	cg27076160	10	64431533	R	ZNF365	3'UTR			33	0.0217271	0.0217271	1.75054	1.75054	apple up vs pear	0.291828	6.55774	0.350673	0.80212	1	0.542946	0.0682305	0.845221	0.848164	0.628365	0.772034	0.708421	0.440395	0.423545	0.725624	0.749967	0.020656	0.78711	0.755903	0.602202	0.124147	0.485319
744519	cg23517115	5	6581849	R	LOC255167	TSS1500	N_Shore		3	0.0222674	0.0222674	1.46524	1.46524	apple up vs pear	0.251041	6.49447	0.259501	0.599359	1	0.734843	0.802003	0.826353	0.880644	0.823433	0.153065	0.787541	0.809023	0.85174	0.691874	0.82817	0.392473	0.697832	0.766337	0.730905	0.775008	0.132195
373058	cg11128983	5	175297531	R	CPLX2	TSS1500	N_Shore		40	0.0223146	0.0223146	0.611744	-1.63467	apple down vs pear	-0.327806	6.48903	0.442469	1.02281	1	0.867321	0.850228	0.154563	0.821589	0.136864	0.888969	0.787973	0.324131	0.798013	0.0601534	0.812435	0.82268	0.369305	0.841488	0.846441	0.83737	0.855587
386101	cg11545307	6	13928973	R	RNF182	5'UTR	S_Shelf		6	0.0226252	0.0226252	0.651781	-1.53426	apple down vs pear	-0.245556	6.45353	0.248285	0.577091	1	0.461382	0.745829	0.228064	0.454397	0.475256	0.836048	0.53653	0.371377	0.512641	0.755156	0.564623	0.853609	0.716582	0	0.518122	0.76824	0.734606
374414	cg11173002	5	168302634	F	SLIT3	Body			1	0.0227403	0.0227403	1.78423	1.78423	apple up vs pear	0.22778	6.44052	0.21364	0.497567	1	0.265032	0.230437	0.688126	0.660477	0.311167	0.642349	0.390131	0.340073	0.677979	0.642241	0.369639	0.196251	0.212856	0.624633	0.655106	0.111483	0.197462
865865	rs2804694									0.0227885	0.0227885	2.85756	2.85756	apple up vs pear	0.378884	6.4351	0.591102	1.37784	1	0.0768719	0.0224281	0.470364	0.886831	0.85967	0.437659	0.430117	0.867673	0.460895	0.414655	0.90057	0.441631	0.0536483	0.888456	0.0257735	0	0.019078
255173	cg07497907	16	77367200	F	ADAMTS18	Body			1	0.0228847	0.0228847	0.495838	-2.01679	apple down vs pear	-0.283036	6.42431	0.329862	0.770188	1	0.820029	0.351042	0	0.790292	0.185628	0.666935	0.542939	0.285838	0	0.512989	0.0681734	0.662701	0.300484	0.466606	0.17362	0.579971	0.306175
484546	cg14548901	2	11430093	R	ROCK2	Body			24	0.0230695	0.0230695	0.557652	-1.79323	apple down vs pear	-0.305232	6.40373	0.383627	0.898602	1	0.665618	0.861378	0.680046	0.490621	0.458992	0.61652	0.270821	0.200501	0.116839	0.096133	0.232227	0.812355	0.507577	0.891538	0.173466	0.715683	0.887808
87004	cg02507579	3	97887864	R	OR5H15	1stExon			51	0.0232139	0.0232139	1.68149	1.68149	apple up vs pear	0.228926	6.38778	0.215794	0.506734	1	0.461904	0.0417906	0.756452	0.473963	0.512756	0.804512	0.14622	0.537696	0.49117	0.576086	0.596943	0.109972	0.568051	0.51369	0.621637	0.270556	0.516475
161925	cg04720713	11	70963427	R			Island			0.0232357	0.0232357	2.45227	2.45227	apple up vs pear	0.227963	6.38538	0.213982	0.502669	1	0.266503	0.208386	0.770434	0.0774431	0.263724	0	0.208263	0.370204	0.386689	0.54494	0.497584	0.133429	0.471272	0	0.46704	0.163071	0.119139
27173	cg00762003	21	45393541	F	AGPAT3	Body	Island		1	0.0233689	0.0233689	1.44923	1.44923	apple up vs pear	0.243667	6.37079	0.24448	0.575628	1	0.790994	0.140079	0.821643	0.700505	0.75975	0.739074	0.797283	0.828971	0.803663	0.763343	0.790348	0.790066	0.760713	0.787935	0.84394	0.375279	0.164123
445361	cg13435526	8	22472050	F	CCAR2	Body			1	0.0235322	0.0235322	1.46928	1.46928	apple up vs pear	0.229283	6.35302	0.216468	0.511099	1	0.737749	0.210679	0.693718	0.75662	0.712465	0.698679	0.718821	0.735417	0.700153	0.694999	0.74491	0.72781	0.68747	0.722084	0.73083	0.147036	0.179309
280091	cg08253809	14	23568017	R	C14orf119	3'UTR	S_Shelf		28	0.0235498	0.0235498	0.526208	-1.90039	apple down vs pear	-0.216491	6.35112	0.192987	0.455793	1	0.528885	0.507426	0.0576397	0.0937088	0.491791	0.29407	0.168408	0.137417	0.481582	0.200908	0.187381	0.712554	0.476438	0.110201	0.167345	0.471226	0.515954
244145	cg07166908	17	50807681	R					39	0.023617	0.023617	1.69251	1.69251	apple up vs pear	0.302392	6.34385	0.376521	0.890283	1	0.509993	0	0.518182	0.76402	0.636268	0.776035	0.867991	0.557688	0.888092	0.908186	0.877736	0.393066	0.652149	0.890531	0.697706	0.509561	0
99713	cg02877261	4	186061165	R			N_Shelf		46	0.023955	0.023955	0.520658	-1.92065	apple down vs pear	-0.237063	6.30769	0.231407	0.550298	1	0.433246	0.374048	0.461878	0.106259	0.0256556	0.326683	0.472157	0.0164469	0.444388	0.0591257	0.0446392	0.576387	0.428509	0.579355	0.408708	0.60285	0.676544
171462	cg04998327	11	103453960	F					0	0.0243866	0.0243866	0.612806	-1.63184	apple down vs pear	-0.314494	6.36257	0.3709	0.816118	1	0.845755	0.892174	0.498697	0.464464	0.791569	0.879355	0.87313	0.0699761	0.471257	0.0946396	0.842179	0.469478	0.504388	0.407558	0.832722	0.913544	?
36148	cg01019971	1	214159610	F			N_Shore	Unclassified_Cell_type_specific	4	0.0244067	0.0244067	2.10795	2.10795	apple up vs pear	0.216201	6.26027	0.19247	0.46117	1	0.229036	0.239832	0.533991	0.568156	0.338396	0.386948	0	0.49068	0.328663	0.488998	0	0	0.205041	0.535462	0.623981	0.281455	0.228683
453820	cg13674558	6	83775899	R	UBE2CBP	TSS1500	N_Shore	Promoter_Associated	38	0.0247088	0.0247088	1.59402	1.59402	apple up vs pear	0.205151	6.22912	0.173299	0.417312	1	0.566038	0.451208	0.651981	0.645511	0.387679	0.397375	0.302816	0.464978	0.923033	0.561512	0.360269	0.217021	0.590479	0.493405	0.426248	0.0594229	0.423629
145942	cg04238896	22	37266319	F	NCF4	Body			1	0.0247368	0.0247368	0.602844	-1.6588	apple down vs pear	-0.296038	6.22625	0.360864	0.869378	1	0.749804	0.751912	0.779244	0.319021	0.024808	0.665339	0.765829	0.154765	0.0873005	0.856968	0.780228	0.736446	0.447822	0.380742	0.662667	0.700088	0.848343
97856	cg02822944	8	66949849	F	DNAJC5B	5'UTR		Unclassified_Cell_type_specific	0	0.0247595	0.0247595	1.57593	1.57593	apple up vs pear	0.285181	6.22393	0.33488	0.807078	1	0.800081	0.491063	0.801431	0.49262	0.804605	0.774397	0.84985	0.828062	0.826775	0.75105	0.861149	0.0657152	0.851395	0.812917	0.773443	0.0229373	0.462103
186964	cg05455372	7	64314295	R	LOC168474	TSS200			39	0.0247905	0.0247905	0.630085	-1.58709	apple down vs pear	-0.274432	6.22076	0.310112	0.747766	1	0.746255	0.81916	0.081613	0.452494	0.187578	0.731016	0.758784	0.750183	0	0.57487	0.763883	0.752815	0.618862	0.554084	0.690891	0.568565	0.816549
831086	cg26576353	10	126135176	R			N_Shore		1	0.0249636	0.0249636	1.40598	1.40598	apple up vs pear	0.205885	6.20318	0.174541	0.42206	1	0.543092	0.519399	0.828656	0.55279	0.832943	0.57323	0.791686	0.813429	0.568787	0.776807	0.832498	0.256186	0.753574	0.373262	0.797454	0.564512	0.301841
551345	cg16655343	6	29701563	R	LOC285830	Body			22	0.0251467	0.0251467	0.578309	-1.72918	apple down vs pear	-0.245951	6.18474	0.249084	0.604109	1	0.373873	0.698838	0.0249519	0.0871653	0.423881	0.692488	0.526643	0.0535127	0.428975	0.347917	0.346655	0.357294	0.587649	0.669286	0.402988	0.642389	0.791217
117505	cg03398919	2	173118470	R					35	0.0251694	0.0251694	0.552053	-1.81142	apple down vs pear	-0.32261	6.18246	0.428553	1.03977	1	0.671703	0.735726	0.80632	0.718528	0.519948	0.62678	0.725375	0.0970059	0.621248	0	0.479814	0.705735	0	0.733005	0	0.795227	0.780831
102555	cg02956194	6	153455993	R			S_Shelf		1	0.0251743	0.0251743	0.575311	-1.73819	apple down vs pear	-0.309337	6.18196	0.394014	0.956041	1	0.832591	0.869732	0.453134	0.0821948	0.0235196	0.801193	0.751161	0.486437	0.0636415	0.796722	0.505387	0.504781	0.49096	0.446352	0.842116	0.419062	0.920162
176530	cg05146307	16	29227937	F			N_Shelf		0	0.0252715	0.0252715	0.69394	-1.44105	apple down vs pear	-0.217044	6.17225	0.193975	0.471404	1	0.685	0.798897	0.0621298	0.51592	0.25732	0.507294	0.878911	0.795525	0.58085	0.668004	0.403564	0.743442	0.520888	0.578281	0.538635	0.678548	0.671999
290390	cg08570077	7	1245797	R					22	0.0253515	0.0253515	0.613374	-1.63033	apple down vs pear	-0.315372	6.16428	0.409539	0.996562	1	0.791556	0.907869	0.211103	0.827028	0.14326	0.832313	0.835495	0.868765	0.526393	0.826595	0.175628	0.857872	0.545249	0.794517	0.0847634	0.895451	0.589358
183140	cg05341252	6	32632715	F	HLA-DQB1	Body	Island	Unclassified	2	0.0256423	0.0256423	3.13137	3.13137	apple up vs pear	0.204652	6.13557	0.172457	0.421616	1	0.0530413	0.0772619	0.109129	0.197135	0.524299	0	0.128671	0.340645	0.555257	0.0368894	0.306247	0.395906	0.443232	0.0980696	0.395802	0.0141617	0.0030888
22623	cg00631759	5	178549790	F	ADAMTS2	Body	N_Shore		0	0.0256643	0.0256643	1.71213	1.71213	apple up vs pear	0.303001	6.13341	0.37804	0.924542	1	0.0746057	0.453447	0.204891	0.768768	0.760905	0.733915	0.719214	0.790984	0.817308	0.795024	0.841372	0.752868	0.732499	0.770936	0.802178	0.208844	0.0355047
606446	cg18485946	7	42313500	R					19	0.0258717	0.0258717	0.567321	-1.76267	apple down vs pear	-0.220145	6.11318	0.199557	0.489656	1	0.626983	0.417639	0.176672	0.372618	0.0896333	0.353134	0.429582	0	0.527821	0.280419	0.259439	0.718113	0.336005	0.391138	0.452755	0.78441	0.231705
158365	cg04608203	12	20036136	F					1	0.0260607	0.0260607	0.645868	-1.54831	apple down vs pear	-0.241512	6.09491	0.240175	0.591086	1	0.655525	0.688853	0	0.68213	0.64204	0.641876	0.679058	0.3448	0.568912	0.656857	0.67127	0.638867	0.0510518	0.444629	0.343013	0.709104	0.760595
692280	cg21603812	9	91424953	F					1	0.0263976	0.0263976	0.602054	-1.66098	apple down vs pear	-0.235309	6.06271	0.227996	0.564093	1	0.584436	0.646737	0.367429	0.60804	0.183721	0.489359	0.631926	0.648638	0	0.433614	0.266078	0.584193	0	0.641102	0.411382	0.506978	0.695538
693279	cg21639922	21	44089014	F	PDE9A	Body	Island		1	0.0264086	0.0264086	1.4637	1.4637	apple up vs pear	0.216608	6.06167	0.193196	0.478076	1	0.183096	0.139618	0.629071	0.661166	0.659245	0.698371	0.683458	0.700491	0.693835	0.888273	0.694833	0.601036	0.720278	0.525562	0.664614	0.703888	0.260435
180849	cg05273049	10	49765381	R	ARHGAP22	Body			46	0.0264429	0.0264429	0.321877	-3.10677	apple down vs pear	-0.289247	6.05842	0.344497	0.852938	1	0.183292	0.0479073	0.132239	0.0826591	0.0806301	0.0425567	0.538456	0.0562696	0.151917	0.0495287	0.0606753	0.752258	0.129538	0.526139	0.103341	0.562473	0.858838
403278	cg12080266	21	36060640	R	CLIC6	Body			30	0.0266106	0.0266106	1.39472	1.39472	apple up vs pear	0.227204	6.0426	0.21256	0.527653	1	0.848868	0.564938	0.834078	0.887149	0.843937	0.571787	0.135815	0.856962	0.580523	0.857312	0.809094	0.501162	0.91444	0.578299	0.866265	0.492083	0.914559
706381	cg22129220	6	24909127	R	FAM65B	5'UTR	N_Shore	Unclassified_Cell_type_specific	48	0.0267886	0.0267886	2.15327	2.15327	apple up vs pear	0.20014	6.02594	0.164936	0.410565	1	0.0973716	0.228451	0.346846	0.482138	0.374009	0.0551569	0.215434	0.307672	0.279967	0.180751	0.308547	0	0.205363	0.821783	0.429733	0.408452	0.209922
558064	cg16866567	8	38759261	R	PLEKHA2	5'UTR	Island	Promoter_Associated	35	0.0272068	0.0272068	3.28556	3.28556	apple up vs pear	0.254719	6.07987	0.255473	0.588272	1	0.0772571	0.0370177	0.758687	0.138005	0.0636873	0.379431	0.109238	0.596224	0.424464	0.596127	0.203891	0.120203	0.396638	0.117779	?	0.0360818	0.0209034
276876	cg08158105	12	125509502	R	BRI3BP	Body	N_Shore		28	0.0274163	0.0274163	1.73117	1.73117	apple up vs pear	0.330829	5.96819	0.450668	1.13267	1	0.089523	0.197631	0.897345	0.265943	0.885633	0.832718	0.787086	0.81789	0.844099	0.913415	0.867341	0.839766	0.826793	0.742658	0.771835	0.42054	0
336832	cg09998151	14	32926900	R	AKAP6	Body			48	0.0275057	0.0275057	2.21606	2.21606	apple up vs pear	0.227143	5.96009	0.212446	0.534671	1	0.141554	0.0463932	0.115982	0.352807	0.326519	0.477857	0.394599	0.640762	0.358279	0.576916	0.17367	0.129087	0.319137	0.641866	0.63335	0.0807631	0.0372462
147258	cg04277055	4	185749877	F			S_Shelf		0	0.0276401	0.0276401	1.67983	1.67983	apple up vs pear	0.307574	5.94797	0.389537	0.982363	1	0.300979	0.891094	0.932362	0.783883	0.495059	0.791623	0.83339	0.789587	0.855294	0.771546	0.665366	0.287157	0.725924	0.804749	0.776223	0	0.0627329
356655	cg10601372	19	986252	F	WDR18	Body	S_Shore		0	0.02771	0.02771	0.613935	-1.62884	apple down vs pear	-0.343812	5.94169	0.486734	1.22878	1	0.933461	0.945981	0.937797	0.917665	0.485641	0.937977	0.891788	0.962364	0.20392	0.879239	0.307614	0.629507	0.238565	0	0.53463	0.929309	0.965865
204311	cg05979511	12	32277197	F	BICD1	Body			0	0.0277216	0.0277216	1.35484	1.35484	apple up vs pear	0.213003	5.94065	0.186819	0.471714	1	0.853418	0.476678	0.837376	0.65096	0.839067	0.142881	0.81416	0.78339	0.787539	0.865772	0.880495	0.5133	0.801446	0.778707	0.908113	0.523454	0.878093
298383	cg08816194	Y	16733442	F	NLGN4Y	TSS1500				0.0280387	0.0280387	2.15421	2.15421	apple up vs pear	0.204444	5.91242	0.172108	0.436642	1	0.141956	0.332512	0.723639	0.335838	0.550376	0.235275	0.118869	0.459234	0.612881	0.235645	0.135658	0.286315	0.38915	0.212495	0.160815	0.0616182	0.0633555
229472	cg06746362	14	88946764	R	PTPN21	Body	S_Shore		46	0.0281141	0.0281141	0.724242	-1.38075	apple down vs pear	-0.201458	5.90576	0.167117	0.424459	1	0.842701	0.781561	0.607256	0.399823	0.806631	0.892022	0.711467	0.608765	0.559498	0.501716	0.474596	0.333448	0.285862	0.433731	0.613154	0.908263	0.64447
44271	cg01253711	4	157898799	F					0	0.0282301	0.0282301	0.609386	-1.641	apple down vs pear	-0.269157	5.89555	0.298305	0.758973	1	0.688748	0.654284	0.732283	0.692662	0.294568	0.729415	0.67015	0.391341	0	0.663808	0.628659	0.647354	0.624873	0.170851	0	0.670602	0.762877
323729	cg09588434	10	124150586	R	PLEKHA1	5'UTR			2	0.0282685	0.0282685	1.90385	1.90385	apple up vs pear	0.265917	5.89219	0.291166	0.741234	1	0.794437	0.218157	0.611883	0.405047	0.303212	0.0894694	0.347503	0.45371	0.591935	0.611383	0.837768	0.144188	0.280662	0.669473	0.836152	0.0605106	0.405176
312862	cg09255886	1	23467060	R	LUZP1	5'UTR			32	0.0283652	0.0283652	1.50346	1.50346	apple up vs pear	0.257742	5.88373	0.273538	0.697359	1	0.472068	0.463063	0.885413	0.790315	0.822706	0.44574	0.82529	0.889427	0.436363	0.868537	0.829556	0.0759483	0.447165	0.864864	0.862493	0.444503	0.856983
865879	rs6626309									0.0285558	0.0285558	2.12791	2.12791	apple up vs pear	0.270854	5.86716	0.302077	0.772292	1	0.0662606	0.00687861	0.0556735	0.450451	0.482815	0.443956	0.151244	0.870567	0.447653	0.438472	0.840084	0.500956	0.506745	0.433431	0.584027	0.0325907	0.479081
631098	cg19392200	6	20143552	R	MBOAT1	Body			2	0.0285565	0.0285565	0.501877	-1.99252	apple down vs pear	-0.345719	5.8671	0.492147	1.25824	1	0.542056	0.33157	0	0.254883	0.335483	0.559328	0.875572	0	0.8801	0.904471	0.421098	0.8225	0.0571073	0.193385	0.436709	0.782809	0.94446
424479	cg12765935	12	95897447	F	METAP2	Body			0	0.0285936	0.0285936	1.37437	1.37437	apple up vs pear	0.23085	5.86389	0.219436	0.561323	1	0.774917	0.469608	0.820178	0.874101	0.825799	0.849476	0.847453	0.811819	0.859608	0.872692	0.841148	0.869024	0.823676	0.877391	0.868457	0.0618526	0.444131
534856	cg16149820	6	164251509	R			N_Shelf		30	0.028708	0.028708	0.702154	-1.42419	apple down vs pear	-0.244691	5.85402	0.246538	0.631715	1	0.772348	0.869185	0.737984	0.738598	0.858334	0.901604	0.771237	0.862626	0.543754	0.253049	0.574904	0.757102	0.42401	0.0719264	0.703251	0.836593	0.842672
172119	cg05016779	5	167924928	R	RARS	Body			51	0.0287479	0.0287479	1.91156	1.91156	apple up vs pear	0.326493	5.85059	0.438932	1.12535	1	0.877552	0.245282	0.82506	0.823245	0.754556	0.677178	0.195412	0.645516	0.71387	0	0.845798	0	0.671106	0.810971	0.756495	0.295684	0.216071
90431	cg02606988	Y	9216456	F	TSPY4	Body	S_Shore			0.0290434	0.0290434	1.90661	1.90661	apple up vs pear	0.236983	5.82535	0.231251	0.595459	1	0.536442	0.269519	0.434377	0.203585	0.351666	0.241142	0.44635	0.157293	0.72724	0.650992	0.669129	0.295274	0.628905	0.541919	0.618671	0	0.0410377
450285	cg13573375	19	4033718	R	PIAS4	Body	S_Shore		14	0.0291119	0.0291119	0.51126	-1.95595	apple down vs pear	-0.312042	5.81954	0.400937	1.03342	1	0.414937	0.861404	0.09214	0.800226	0.232809	0.760301	0.307972	0.854188	0.125694	0.146372	0.283104	0.425482	0.15142	0.279852	0.298392	0.862817	0.836321
252415	cg07415789	14	103348743	R	TRAF3	Body			43	0.0291601	0.0291601	1.51237	1.51237	apple up vs pear	0.283402	5.81547	0.330716	0.853026	1	0.815143	0.186215	0.853468	0.883186	0.913417	0.823986	0.888142	0.849431	0.843307	0.752078	0.896188	0.814151	0.918403	0.886072	0.569644	0.226758	0.117427
2266	cg00060404	7	107423254	F	SLC26A3	ExonBnd			0	0.0292898	0.0292898	0.650274	-1.53781	apple down vs pear	-0.293826	5.80453	0.355492	0.918657	1	0.771873	0.890951	0.767302	0.743783	0.0165014	0.878833	0.765149	0.742932	0.516328	0.0213763	0.417279	0.828051	0.935451	0.534818	0.767575	0.849085	0.897182
728092	cg22933800	6	32605704	R	HLA-DQA1	Body			51	0.0294351	0.0294351	0.573855	-1.7426	apple down vs pear	-0.274482	5.79235	0.310224	0.803364	1	0.889243	0.871216	0.00236946	0.518527	0.249451	0.50703	0.502845	0.522123	0.0247056	0.401073	0.529037	0.571896	0.1115	0.5037	0.833743	0.59326	0.573241
829153	cg26512469	13	113688268	R	MCF2L	Body	S_Shore		42	0.0295477	0.0295477	1.47803	1.47803	apple up vs pear	0.254086	5.78295	0.265835	0.68953	1	0.128587	0.0957035	0.861688	0.623331	0.625938	0.859679	0.803552	0.877479	0.849021	0.862308	0.846701	0.584695	0.895852	0.831918	0.581896	0.628685	0.619788
570069	cg17251507	2	12214913	F	LOC100506457	Body			0	0.0295528	0.0295528	0.578832	-1.72762	apple down vs pear	-0.269947	5.78252	0.300059	0.778361	1	0.518719	0.87799	0.188417	0.467217	0.0806552	0.794905	0.464232	0.484487	0.518731	0.499956	0.508634	0.516117	0.127234	0.0170566	0.817637	0.822913	0.491773
722710	cg22741595	11	77532707	R	C11orf67	5'UTR	S_Shore	Promoter_Associated	8	0.0297536	0.0297536	0.395774	-2.52669	apple down vs pear	-0.201763	5.76588	0.167622	0.436069	1	0.580079	0.0538071	0.0730134	0.00266891	0.18748	0.46036	0.132088	0.164203	0.225274	0.10251	0.160183	0.528264	0.0709071	0.279058	0.0562668	0.0334178	0.549417
369355	cg11008123	11	33097335	R	LOC283267	TSS1500			48	0.0298557	0.0298557	0.563317	-1.7752	apple down vs pear	-0.292632	5.75747	0.352609	0.918658	1	0.853179	0.867542	0.293326	0.816288	0.305733	0.812367	0.335692	0.267001	0.819799	0.29004	0.287977	0.793016	0.375247	0.273919	0.0456049	0.739734	0.289351
776086	cg24634455	4	2804854	F	SH3BP2	5'UTR			0	0.0300722	0.0300722	2.1441	2.1441	apple up vs pear	0.300236	5.73973	0.371171	0.970004	1	0.122767	0.0712008	0.146872	0.543039	0.76705	0.568952	0.539684	0.50141	0.778328	0.441193	0.791148	0.0546205	0.0990894	0.760526	0.797915	0.0706875	0.409037
631481	cg19405842	1	2038661	R	PRKCZ	5'UTR	Island		17	0.0302204	0.0302204	0.483589	-2.06787	apple down vs pear	-0.280137	5.72768	0.32314	0.84626	1	0.44105	0.684022	0.731661	0.683995	0.0457936	0.398177	0.484728	0.46507	0.0729948	0	0.0735014	0.375244	0.117674	0.0458745	0.386761	0.705017	0.709051
487384	cg14629612	21	38224537	R	HLCS	Body			2	0.0303625	0.0303625	1.50158	1.50158	apple up vs pear	0.278614	5.71619	0.319634	0.838761	1	0.337278	0.87207	0.809155	0.824198	0.914832	0.957893	0.104356	0.829584	0.833097	0.909419	0.835241	0.880325	0.687705	0.928861	0.768811	0.594258	0.142159
722217	cg22723460	20	11188606	F					0	0.0307288	0.0307288	0.551429	-1.81347	apple down vs pear	-0.357206	5.68685	0.525396	1.38582	1	0.556187	0.911602	0.847927	0.526667	0.019516	0.479222	0.910112	0.100537	0.878401	0.557306	0.518711	0.887557	0.0639338	0.0235307	0.854619	0.907994	0.921573
72090	cg02069150	12	9556998	F					1	0.0310012	0.0310012	0.669255	-1.4942	apple down vs pear	-0.236764	5.6653	0.230823	0.61115	1	0.830475	0.833832	0.320457	0.129294	0.709366	0.418976	0.612903	0.732638	0.438312	0.585371	0.326402	0.865573	0.196481	0.660558	0.691989	0.682416	0.766778
39408	cg01111656	13	101167993	R	PCCA	Body		Unclassified	37	0.0310395	0.0310395	1.47885	1.47885	apple up vs pear	0.266304	5.66228	0.292014	0.773578	1	0.296267	0.0946933	0.576962	0.944756	0.844688	0.832179	0.436862	0.874872	0.844004	0.850376	0.797009	0.369947	0.784439	0.830812	0.876398	0.904203	0.958742
54467	cg01553548	4	79282758	F	FRAS1	Body			1	0.0310538	0.0310538	1.62232	1.62232	apple up vs pear	0.255604	5.66116	0.26902	0.712805	1	0.68592	0.0155227	0.675275	0.745355	0.68057	0	0.667314	0.633162	0.776529	0.659472	0.539592	0.15765	0.674603	0.586154	0.692609	0.663209	0.685481
475453	cg14289956	6	35372052	R	PPARD	5'UTR			1	0.03107	0.03107	1.42988	1.42988	apple up vs pear	0.223473	5.65989	0.205635	0.54498	1	0.842919	0.494085	0.645756	0.471923	0.778576	0.815068	0.526182	0.783658	0.802027	0.800715	0.810143	0.432349	0.817659	0.798644	0.724081	0.496675	0.0316414
119215	cg03448017	16	83980015	F					0	0.0312065	0.0312065	1.67509	1.67509	apple up vs pear	0.259043	5.64919	0.276307	0.733662	1	0.719033	0.391742	0.671916	0.470373	0.673397	0.678778	0.724755	0.683361	0.689682	0.682612	0.67104	0.0712663	0.722044	0.4324	0.730747	0.0793358	0.0210923
157816	cg04592386	19	33357843	F	SLC7A9	Body			1	0.0314236	0.0314236	1.55283	1.55283	apple up vs pear	0.26804	5.6323	0.295834	0.787867	1	0.169394	0.82668	0.724999	0.767745	0.775677	0.761298	0.773827	0.803051	0.67072	0.767285	0.759609	0.712468	0.730313	0.786112	0.74337	0.15027	0
266951	cg07856408	3	171540401	R					29	0.0314272	0.0314272	0.6535	-1.53022	apple down vs pear	-0.2963	5.63203	0.361504	0.962809	1	0.647849	0.911036	0.596167	0.0994254	0.660927	0.834419	0.861366	0.90969	0.594396	0	0.499731	0.912937	0.434481	0.885853	0.907574	0.905597	0.912669
677511	cg21070081	5	110105162	R					50	0.0314955	0.0314955	0.548818	-1.8221	apple down vs pear	-0.200064	5.62674	0.164811	0.43936	1	0.379252	0.555643	0.147666	0.349786	0	0.283172	0.280905	0.192132	0.392771	0.0504724	0.0641116	0.470644	0.282735	0.318157	0.635746	0.521966	0.61237
420159	cg12624040	2	168675205	R	B3GALT1	5'UTR			46	0.032236	0.032236	0.716567	-1.39554	apple down vs pear	-0.220349	5.57027	0.199927	0.538378	1	0.805018	0.857512	0.529602	0.55263	0.493859	0.460505	0.798274	0.479914	0.788311	0.814289	0.504853	0.812371	0.450615	0.838094	0.118628	0.824922	0.8834
90786	cg02617100	17	70420028	F	LINC00673	Body		Unclassified_Cell_type_specific	1	0.0322457	0.0322457	0.553829	-1.80561	apple down vs pear	-0.355641	5.56954	0.520803	1.40264	1	0.864693	0.894233	0.204767	0.833729	0.8082	0.893793	0.321515	0.855282	0	0.852497	0.286779	0.797458	0.175598	0.337157	0.0605448	0.894443	0.913543
813791	cg25982036	2	32913458	F	TTC27	Body			0	0.0323315	0.0323315	0.740169	-1.35104	apple down vs pear	-0.202194	5.56309	0.168339	0.4539	1	0.852668	0.8128	0.865133	0.35643	0.623318	0.593293	0.867966	0.39549	0.864357	0.632617	0.683027	0.635794	0.404654	0.635783	0.298988	0.876172	0.808523
830497	cg26556336	15	87197932	R	AGBL1	Body			49	0.0325623	0.0325623	1.37774	1.37774	apple up vs pear	0.212392	5.54586	0.185748	0.502397	1	0.688708	0.0585261	0.779185	0.730865	0.728391	0.726883	0.745115	0.891656	0.814424	0.704778	0.750934	0.357845	0.730662	0.788701	0.827017	0.488063	0.870746
99266	cg02863943	19	53312831	F	ZNF28	Body			0	0.0325789	0.0325789	0.586701	-1.70445	apple down vs pear	-0.308993	5.54462	0.393139	1.06357	1	0.518161	0.571087	0.165373	0.578306	0.792353	0.545979	0.922907	0.424862	0.0924307	0.827197	0.552695	0.895865	0.101248	0.0887227	0.763133	0.865979	0.913397
189165	cg05522042	16	85124401	R	KIAA0513	3'UTR		Unclassified_Cell_type_specific	1	0.0327451	0.0327451	0.582681	-1.7162	apple down vs pear	-0.237531	5.53231	0.232322	0.629904	1	0.442906	0.668913	0.0980165	0.392995	0.0240575	0.615301	0.680045	0.655831	0.429748	0.0632985	0.0612301	0.403172	0.590528	0.389879	0.610941	0.577678	0.596269
174709	cg05091477	13	112551661	F	LINC00354	Body	S_Shelf		0	0.0330562	0.0330562	0.570869	-1.75171	apple down vs pear	-0.252114	5.50945	0.261724	0.712569	1	0.386871	0.727207	0.371096	0.635869	0.112611	0.742183	0.461609	0.425921	0.0494314	0.430119	0.423238	0.629829	0.0346365	0.131962	0.738972	0.767622	0.397179
516107	cg15557693	7	30897354	F	FAM188B	Body			6	0.0335286	0.0335286	1.43207	1.43207	apple up vs pear	0.206517	5.47521	0.175614	0.481117	1	0.611694	0.752902	0.603158	0.680076	0.638687	0.378563	0.272773	0.721234	0.80077	0.667358	0.675728	0.608562	0.736302	0.621167	0.700447	0	0.721336
323529	cg09581911	12	4699232	F	DYRK4	TSS200			0	0.0340251	0.0340251	0.687231	-1.45512	apple down vs pear	-0.218187	5.43983	0.196023	0.54052	1	0.821312	0.799556	0.467761	0.784361	0.412288	0.463121	0.769389	0.416792	0.46763	0.432683	0.42348	0.772491	0.0863394	0.819885	0.482876	0.45241	0.804898
264543	cg07784451	10	8952817	R	LOC105755953	Body			14	0.0340462	0.0340462	0.672979	-1.48593	apple down vs pear	-0.236069	5.43834	0.22947	0.632924	1	0.760124	0.859103	0.199582	0.441926	0.306675	0.311763	0.867282	0.437679	0.317434	0.345314	0.84332	0.653995	0.711823	0.582321	0.672007	0.707922	0.892948
621097	cg19017212	7	130683570	F	LINC-PINT	Body			1	0.0340984	0.0340984	2.33848	2.33848	apple up vs pear	0.269969	5.43465	0.300107	0.828315	1	0.152927	0.255367	0.706179	0.262435	0.757076	0.343008	0.187639	0	0.68765	0.277597	0.491336	0	0.540567	0.829863	0.16397	0.385906	0.0870411
847668	cg27141807	3	140786844	R	SPSB4	Body	S_Shore		27	0.0346037	0.0346037	1.81869	1.81869	apple up vs pear	0.290251	5.39934	0.346894	0.963713	1	0.801443	0.0342603	0.729111	0.539464	0.790778	0.676083	0.72636	0.812438	0.721985	0.510258	0.471585	0.108206	0.559001	0.481754	0.83143	0.112703	0.0226506
656529	cg20300784	2	64839958	R			S_Shelf		1	0.0348891	0.0348891	0.652417	-1.53276	apple down vs pear	-0.260617	5.37966	0.279675	0.779812	1	0.478322	0.803386	0.814698	0.448044	0.458394	0.744228	0.81071	0.81777	0.480341	0.813902	0.0723416	0.782352	0.0502523	0.468001	0.468048	0.797614	0.831959
409456	cg12280242	4	4112056	F			S_Shelf		1	0.034918	0.034918	1.40042	1.40042	apple up vs pear	0.241899	5.37768	0.240945	0.672069	1	0.861698	0.0314692	0.857276	0.731765	0.811198	0.882262	0.832967	0.875012	0.858962	0.915536	0.867174	0.636546	0.933435	0.751952	0.85788	0.286363	0.697536
678985	cg21126403	3	114343227	F	ZBTB20	TSS200			7	0.0349321	0.0349321	1.87447	1.87447	apple up vs pear	0.210813	5.37671	0.182996	0.510525	1	0.27615	0.241001	0.145616	0.430256	0.60873	0.121499	0.481198	0.743487	0.296322	0.40586	0.749772	0.0745748	0.582312	0.277964	0.278552	0.328084	0.165016
803493	cg25601709	12	129337339	F	GLT1D1	TSS1500	N_Shore		0	0.0350952	0.0350952	1.48446	1.48446	apple up vs pear	0.236215	5.36556	0.229755	0.642304	1	0.803233	0.219944	0.641838	0.749393	0.737595	0.725775	0.698875	0.786724	0.703983	0.693196	0.785619	0.0832477	0.655243	0.792546	0.691902	0.73659	0.145456
602262	cg18339359	8	23423757	R	SLC25A37	Body			31	0.0354523	0.0354523	0.542214	-1.84429	apple down vs pear	-0.374061	5.41709	0.524707	1.35606	1	0.805394	?	0.215692	0.85775	0.0347611	0.851192	0.426656	0.338946	0.208395	0.83867	0.103124	0.891645	0.878293	0.135724	0.819132	0.962083	0.965689
109303	cg03154433	6	10409011	F	TFAP2A	Body	N_Shore		20	0.0355614	0.0355614	2.07373	2.07373	apple up vs pear	0.207171	5.33402	0.176729	0.496987	1	0.22704	0.36312	0.462867	0.70382	0.500543	0	0	0.296639	0	0.31375	0.336627	0.141318	0.623259	0.294888	0.468778	0.374422	0.244719
104773	cg03020379	19	14586979	F	PTGER1	TSS1500	S_Shore	Unclassified_Cell_type_specific	0	0.0356416	0.0356416	1.41577	1.41577	apple up vs pear	0.227097	5.32865	0.212359	0.597785	1	0.867901	0.058544	0.741229	0.812715	0.807797	0.630613	0.73633	0.626752	0.780858	0.574767	0.944248	0.726767	0.798577	0.887383	0.758738	0.277139	0.526174
115105	cg03326823	Y	15814705	F	TMSB4Y	TSS1500	N_Shore			0.0356643	0.0356643	2.20666	2.20666	apple up vs pear	0.218188	5.32713	0.196025	0.551963	1	0.0243833	0.201174	0.518097	0.385262	0.553454	0	0.0969132	0.148883	0.403195	0.322088	0.320667	0.577276	0.343017	0.188624	0.806793	0.225482	0.14051
838961	cg26848300	17	3499291	F	TRPV1	5'UTR			1	0.0358079	0.0358079	1.36547	1.36547	apple up vs pear	0.21964	5.31754	0.198643	0.560343	1	0.821876	0.25791	0.952944	0.792849	0.797855	0.829326	0.705224	0.783497	0.73127	0.796858	0.849919	0.707815	0.870762	0.892941	0.73728	0.777624	0.107066
49060	cg01394772	20	17883681	F					0	0.0359245	0.0359245	1.39209	1.39209	apple up vs pear	0.221805	5.30979	0.202577	0.572275	1	0.493082	0.0400474	0.872452	0.810833	0.841288	0.80215	0.787372	0.807258	0.793479	0.81101	0.511152	0.856219	0.813712	0.796005	0.817863	0.501795	0.479237
381055	cg11379315	4	88755207	R	MEPE	5'UTR			1	0.0359595	0.0359595	0.695146	-1.43855	apple down vs pear	-0.224732	5.30747	0.207959	0.587736	1	0.835993	0.871056	0.846384	0.742092	0.317796	0.822598	0.399109	0.266733	0.428146	0.606812	0.605868	0.693602	0.215046	0.675625	0.419964	0.660175	0.877716
590368	cg17923485	7	3341630	F	SDK1	Body	Island		1	0.0360688	0.0360688	0.522134	-1.91522	apple down vs pear	-0.240005	5.30024	0.237186	0.67125	1	0.792071	0.355202	0	0.584906	0.299075	0.508612	0.455016	0.356482	0.102255	0.693813	0.025887	0.672808	0.10946	0.188425	0.262078	0.459574	0.272418
827913	cg26469782	4	4117213	R			N_Shelf		32	0.0361704	0.0361704	1.79241	1.79241	apple up vs pear	0.261988	5.29354	0.282626	0.80086	1	0.589559	0.07535	0.684028	0.657309	0.524517	0.561369	0.745111	0.176362	0.815339	0.571814	0.567857	0.19864	0.576536	0.540927	0.811418	0.0906181	0.0537123
121830	cg03525852	8	7055288	R					44	0.0364462	0.0364462	1.39185	1.39185	apple up vs pear	0.209599	5.27547	0.180895	0.514348	1	0.777166	0.778894	0.77242	0.760388	0.758802	0.286948	0.785893	0.710692	0.738694	0.733061	0.785329	0.575761	0.721729	0.688665	0.775233	0.515444	0.0242096
218371	cg06417478	19	12876846	R	HOOK2	Body	N_Shore	Unclassified_Cell_type_specific		0.0366571	0.0366571	2.1549	2.1549	apple up vs pear	0.21723	5.26176	0.194307	0.553924	1	0.480809	0.0832544	0.483683	0.476265	0.464109	0.0865829	0.096705	0.455826	0.683598	0.458596	0.454762	0.447595	0.452952	0.0467138	0.0767328	0.0690261	0.0526829
788700	cg25071634	Y	9172441	F	TTTY20	TSS200	N_Shore			0.0366637	0.0366637	1.74519	1.74519	apple up vs pear	0.207696	5.26134	0.177625	0.506408	1	0.336001	0.25636	0.669079	0.531872	0.34959	0.168059	0.415209	0.351843	0.63925	0.139344	0.690306	0	0.438022	0.689779	0.365015	0.552354	0.223018
456453	cg13749548	14	75722495	R			N_Shelf		28	0.0370883	0.0370883	0.496322	-2.01482	apple down vs pear	-0.376803	5.23401	0.584624	1.67546	1	0	0.935948	0.630308	0.692456	0.757161	0.561481	0.959162	0.637243	0.094271	0.07647	0.0947468	0.936997	0	0.626888	0.103453	0.908176	0.934953
205981	cg06031234	14	90234548	F					0	0.0373601	0.0373601	0.6014	-1.66279	apple down vs pear	-0.278021	5.21671	0.318276	0.915163	1	0.82219	0.848967	0.751327	0.167503	0.222663	0.739604	0.736744	0.455328	0.576508	0.732783	0.0472408	0.558453	0.148949	0.20583	0.886589	0.683414	0.493077
252088	cg07404046	20	1569554	R	SIRPB1	Body			16	0.0375077	0.0375077	2.3208	2.3208	apple up vs pear	0.24149	5.20738	0.240131	0.691705	1	0.34074	0.219797	0.553074	0.370671	0.573414	0	0.251032	0	0.594793	0.481441	0.547001	0.0177039	0.625392	0.497489	0	0.450587	0
83456	cg02401352	15	89354338	R	ACAN	5'UTR			47	0.0376535	0.0376535	0.64592	-1.54818	apple down vs pear	-0.208844	5.19819	0.179594	0.51824	1	0.450619	0.626016	0.425308	0.670836	0.330322	0.406741	0.663378	0.724339	0.446413	0.343264	0.0159687	0.629832	0.37246	0.0730336	0.407829	0.652241	0.699922
575517	cg17421046	6	32608879	F	HLA-DQA1	Body			1	0.0376585	0.0376585	0.618116	-1.61782	apple down vs pear	-0.31766	5.19788	0.415504	1.19906	1	0.82574	0.876581	0	0.77484	0	0.923161	0.665816	0.760705	0.303224	0.793231	0.857271	0.811317	0.157745	0.850224	0.644403	0.812083	0.908075
756566	cg23943944	5	116197864	R					40	0.0378103	0.0378103	1.74134	1.74134	apple up vs pear	0.295214	5.18837	0.358858	1.03749	1	0.497633	0.0385859	0.857579	0.474964	0.858249	0.796054	0.843077	0.74338	0.496043	0.828942	0.489868	0.0382235	0.52604	0.818711	0.840522	0.531205	0.0427342
541177	cg16345566	6	32633102	F	HLA-DQB1	Body	S_Shore		0	0.0380184	0.0380184	2.13786	2.13786	apple up vs pear	0.242588	5.1754	0.242318	0.702318	1	0.256432	0.180466	0.615704	0.321438	0.661835	0.388315	0.400813	0.359514	0.845999	0.138287	0.253175	0.0980889	0.807455	0.34696	0.207468	0.0963265	0.0719308
563692	cg17049318	16	77612894	R					27	0.0380644	0.0380644	1.76826	1.76826	apple up vs pear	0.313442	5.17255	0.404542	1.17314	1	0.82115	0.0233974	0.666495	0.512323	0.88284	0.799207	0.0103612	0.518959	0.833059	0.853031	0.575716	0.427759	0.522733	0.959944	0.889195	0.742531	0.0315055
687708	cg21442528	12	1609034	F	LOC100292680	TSS1500			0	0.0381546	0.0381546	1.36848	1.36848	apple up vs pear	0.238162	5.16697	0.233558	0.678033	1	0.853981	0.476269	0.918137	0.934969	0.848946	0.921409	0.866849	0.928066	0.885579	0.844157	0.908418	0.444787	0.882508	0.826864	0.867293	0.0484115	0.912613
475010	cg14278666	7	137350242	R	DGKI	Body			15	0.0383047	0.0383047	1.51653	1.51653	apple up vs pear	0.267657	5.1577	0.294989	0.857907	1	0.833953	0.204281	0.716563	0.854028	0.808192	0.818766	0.896034	0.805745	0.710742	0.751772	0.805412	0	0.785977	0.730695	0.889307	0.675479	0.198792
284730	cg08397053	3	171222492	F					0	0.0383201	0.0383201	0.601025	-1.66382	apple down vs pear	-0.294954	5.15675	0.358227	1.04201	1	0.53766	0.880791	0.862032	0.521606	0.0296574	0.54259	0.558099	0.47804	0.548737	0.833393	0.0870735	0.897004	0.0176642	0.528314	0.536744	0.831465	0.927352
285501	cg08421632	7	36441227	F	ANLN	Body			0	0.0383636	0.0383636	1.54821	1.54821	apple up vs pear	0.25518	5.15408	0.268128	0.780336	1	0.893061	0.053793	0.810704	0.861075	0.778089	0.761132	0.161506	0.476621	0.665183	0.74507	0.729415	0.279087	0.656973	0.716218	0.767192	0.334845	0.774896
82419	cg02372539	6	168703878	F	DACT2	Body			0	0.03837	0.03837	1.44521	1.44521	apple up vs pear	0.206825	5.15368	0.176139	0.512661	1	0.706927	0.444519	0.745664	0.693053	0.374946	0.734479	0.476961	0.712299	0.709026	0.766296	0.818614	0.429151	0.751281	0.451958	0.690722	0.438054	0.0218334
865861	rs2385226									0.0383964	0.0383964	2.9823	2.9823	apple up vs pear	0.292668	5.15206	0.352695	1.02686	1	0.42006	0.0257315	0.40736	0.406273	0.970258	0.0668015	0.405877	0.420564	0.0617784	0.356717	0.369851	0.0402049	0.939694	0.400654	0.0699351	0.0679154	0.00689504
704870	cg22071943	5	1225434	R	SLC6A18	TSS200	N_Shore		42	0.0384618	0.0384618	0.552839	-1.80885	apple down vs pear	-0.283051	5.14805	0.329897	0.96123	1	0.726244	0.0407953	0.218222	0.149009	0.333557	0.77493	0.724692	0.680636	0.729852	0.178976	0	0.665366	0.187286	0.519348	0.502562	0.708983	0.789962
570224	cg17256465	3	171802458	F	FNDC3B	5'UTR			0	0.0384678	0.0384678	0.576305	-1.73519	apple down vs pear	-0.228975	5.14768	0.215887	0.629079	1	0.403636	0.475817	0.147666	0.436258	0.107574	0.434211	0.464899	0.490115	0.0498097	0.811836	0.425552	0.764576	0.33719	0.173424	0.135064	0.737711	0.502117
714990	cg22460601	8	7189563	R	USP17L1	TSS1500			49	0.0392268	0.0392268	1.5365	1.5365	apple up vs pear	0.233227	5.10171	0.223979	0.65854	1	0.704206	0.634038	0.728522	0.693131	0.518642	0.765016	0.632421	0.628779	0.712937	0.658303	0.708013	0.237846	0.682506	0.625682	0.722917	0	0.0694858
28432	cg00797779	17	74097330	R	EXOC7	Body	N_Shelf		40	0.0398208	0.0398208	1.42675	1.42675	apple up vs pear	0.212675	5.06645	0.186244	0.551404	1	0.71443	0.0504602	0.949774	0.33162	0.691472	0.628222	0.521321	0.679797	0.749703	0.703203	0.715673	0.411372	0.803201	0.801016	0.684886	0.730024	0.432686
597518	cg18168924	Y	7177888	F	PRKY	Body				0.039823	0.039823	0.559784	-1.7864	apple down vs pear	-0.231233	5.06632	0.220165	0.651849	1	0.703305	0.414219	0.0989392	0.31146	0	0.509635	0.763311	0.396422	0.694734	0.407323	0	0.621382	0.202782	0.318615	0.510116	0.423622	0.24143
359429	cg10690713	22	23870527	F					1	0.0398328	0.0398328	0.57339	-1.74401	apple down vs pear	-0.23998	5.06574	0.237136	0.702176	1	0.177742	0.62756	0.0971001	0.599542	0.202181	0.609816	0.585383	0.210821	0.104388	0.571457	0.633133	0.658648	0.59019	0.122499	0.0941635	0.66895	0.609591
590299	cg17920646	8	216578	R			Island		13	0.0399533	0.0399533	1.55485	1.55485	apple up vs pear	0.244939	5.05867	0.247038	0.732518	1	0.376288	0.891205	0.857476	0.694148	0.601785	0.525322	0.393062	0.572511	0.880747	0.805077	0.885096	0.268606	0.591279	0.744064	0.231741	0.09841	0.537284
657550	cg20337029	15	101985922	R	PCSK6	Body			34	0.0407167	0.0407167	1.79201	1.79201	apple up vs pear	0.222234	5.01441	0.203363	0.608334	1	0.572829	0.0306724	0.5749	0.638587	0.391724	0.429265	0.0728134	0.411256	0.625116	0.635168	0.427939	0.0853235	0.673381	0.0426066	0.607628	0.398254	0.375017
862126	cg27639199	15	81666528	R	TMC3	TSS200			40	0.0407208	0.0407208	0.557777	-1.79283	apple down vs pear	-0.267369	5.01418	0.294355	0.880568	1	0.105984	0.80786	0.0834434	0.502801	0.0471317	0.495572	0.459049	0.124857	0.0609663	0.51422	0.535764	0.769814	0.536601	0.459223	0.507329	0.749288	0.844652
80595	cg02320265	2	160894	F					0	0.0407559	0.0407559	0.692223	-1.44462	apple down vs pear	-0.209648	5.01216	0.180979	0.54162	1	0.796923	0.818681	0.492272	0.43973	0.444708	0.671822	0.799966	0.782692	0.783743	0.428013	0.0536289	0.463527	0.400905	0.466424	0.423088	0.777246	0.440012
210323	cg06164346	16	67742325	R	GFOD2	Body			1	0.041036	0.041036	1.8782	1.8782	apple up vs pear	0.24538	4.99619	0.247929	0.744356	1	0.790441	0.0323745	0.334209	0.448542	0.516408	0.469025	0.0924987	0.722789	0.411174	0.811454	0.712018	0.128753	0.429088	0.4007	0.461563	0.423588	0.0192191
541114	cg16343465	6	139670676	F					1	0.0410786	0.0410786	1.69659	1.69659	apple up vs pear	0.233093	4.99377	0.223722	0.672005	1	0.636418	0.240217	0.415779	0.686058	0.740426	0.32767	0.162629	0.657653	0.688369	0	0.519902	0.264992	0.719456	0.74709	0.502402	0.532785	0.177629
651358	cg20106158	Y	6388486	F			Island			0.0412874	0.0412874	2.50942	2.50942	apple up vs pear	0.24256	4.98195	0.242264	0.729425	1	0	0.420829	0.540408	0.448811	0.407731	0.0844554	0	0.399214	0.520818	0.406051	0.477405	0.467665	0	0.790886	0.0412538	0	0.151932
86164	cg02483977	7	77827649	F	MAGI2	Body			0	0.0420092	0.0420092	0.592464	-1.68787	apple down vs pear	-0.287257	4.94164	0.339774	1.03136	1	0.150862	0.855993	0.13399	0.844406	0.505402	0.760827	0.788858	0.123413	0.071501	0.781698	0.234393	0.81144	0.469681	0.506459	0.505122	0.724735	0.841331
780099	cg24769381	11	78052863	R	GAB2	Body			46	0.0422674	0.0422674	1.52595	1.52595	apple up vs pear	0.24938	4.92742	0.256078	0.779549	1	0.509356	0.53795	0.104464	0.840726	0.861936	0.547881	0.567796	0.502802	0.889697	0.547655	0.869838	0.0980718	0.89051	0.870079	0.857647	0.543635	0.514399
336871	cg09999381	3	53069292	R	SFMBT1	5'UTR			19	0.0424706	0.0424706	0.684478	-1.46097	apple down vs pear	-0.268934	4.91629	0.297812	0.908647	1	0.768034	0.916983	0.640071	0.720552	0.845756	0.908675	0.830836	0.799742	0.841987	0.799932	0.750147	0.88707	0	0.180462	0.25549	0.797236	0.857603
209776	cg06147194	17	72860652	R	FDXR	Body	S_Shelf	Unclassified	24	0.0432527	0.0432527	1.32784	1.32784	apple up vs pear	0.203658	4.87406	0.170786	0.525597	1	0.839481	0.858516	0.850546	0.902879	0.86082	0.449188	0.821168	0.818675	0.782699	0.813982	0.832721	0.111092	0.832816	0.792228	0.761255	0.82979	0.439192
855552	cg27415324	22	17901078	R			S_Shelf		18	0.0434824	0.0434824	1.59292	1.59292	apple up vs pear	0.284879	4.86182	0.334172	1.03101	1	0.849195	0.0646235	0.815313	0.581712	0.781636	0.761136	0.828556	0.744171	0.898885	0.789715	0.770507	0.766113	0.72258	0.714813	0.834142	0.0472929	0.0463617
675415	cg20994372	1	47139684	R	EFCAB14-AS1	TSS200			11	0.043529	0.043529	1.43692	1.43692	apple up vs pear	0.235993	4.85935	0.229323	0.707881	1	0.707239	0.891632	0.763059	0.810437	0.83348	0.75682	0.243152	0.725535	0.767871	0.804615	0.687101	0.0358471	0.7764	0.828574	0.764093	0.303015	0.843161
555440	cg16779438	13	100747565	R	PCCA	Body			37	0.0436554	0.0436554	0.662602	-1.5092	apple down vs pear	-0.256318	4.85265	0.270524	0.836215	1	0.903769	0.835915	0.656063	0.119527	0.470715	0.867878	0.416548	0.532855	0.812006	0.835872	0.494607	0.949337	0.505721	0.509248	0.0971011	0.465616	0.878758
86821	cg02502145	2	39319447	R	SOS1	Body			35	0.0441663	0.0441663	0.375086	-2.66606	apple down vs pear	-0.290181	4.82583	0.346727	1.07772	1	0.109295	0.893224	0.214506	0.575751	0.114784	0.0741829	0.0743288	0.148776	0.156707	0.115019	0.0740706	0.553564	0.136744	0	0.205367	0.933199	0.612683
21415	cg00597723	5	158691793	R	UBLCP1	5'UTR	S_Shore		51	0.0444987	0.0444987	1.82576	1.82576	apple up vs pear	0.333333	4.80857	0.457514	1.42718	1	0.204858	0.909651	0.946186	0.79261	0.725461	0.865709	0.845463	0.816973	0.54395	0.444548	0.842909	0	0.816267	0.861823	0.579288	0	0
294928	cg08708231	11	132992485	R	OPCML	Body			47	0.0456024	0.0456024	0.70087	-1.4268	apple down vs pear	-0.233274	4.75233	0.224069	0.707239	1	0.716226	0.845532	0	0.747811	0.356254	0.699628	0.732724	0.741614	0.687834	0.475638	0.677543	0.779707	0.78737	0.781027	0.210597	0.821473	0.863608
468897	cg14104700	13	21889774	R			N_Shelf		31	0.0456907	0.0456907	0.685078	-1.45969	apple down vs pear	-0.235191	4.7479	0.227766	0.719578	1	0.767506	0.855188	0.521735	0.661478	0.113367	0.69603	0.784559	0.882133	0.657908	0.689827	0.423703	0.930879	0.0705338	0.689326	0.406289	0.533764	0.659816
301260	cg08896901	4	152996165	F					1	0.0457993	0.0457993	1.64308	1.64308	apple up vs pear	0.241854	4.74247	0.240854	0.7618	1	0.410999	0.223892	0.677567	0.276754	0.800989	0.205814	0.752516	0.562245	0.76634	0.723953	0.713389	0.0722749	0.252273	0.703912	0.701963	0.255273	0.711827
391022	cg11701583	12	57633209	R	NDUFA4L2	5'UTR	Island	Unclassified	14	0.0460612	0.0460612	0.217573	-4.59615	apple down vs pear	-0.236574	4.72942	0.230453	0.730914	1	0.0375782	0.0633108	0.112742	0.0158969	0.0703899	0.0497469	0.0968384	0.014914	0.0587293	0.0555954	0.0491559	0.457448	0.0987853	0.088729	0.0929155	0.968426	0.443166
584625	cg17724121	11	5291531	F	HBE1	TSS200			0	0.046314	0.046314	0.627296	-1.59414	apple down vs pear	-0.315045	4.71691	0.40869	1.29965	1	0.921889	0.87118	0	0.694576	0.575179	0.819897	0.804213	0.654621	0.860431	0.894498	0.841456	0.849244	0.781748	0	0	0.815607	0.83504
309946	cg09167828	2	11286089	R	C2orf50	3'UTR			47	0.0469123	0.0469123	1.58144	1.58144	apple up vs pear	0.289219	4.68761	0.344432	1.10216	1	0.845055	0.0186122	0.892649	0.437548	0.927148	0.869012	0.91173	0.763966	0.81384	0.766296	0.85169	0.465794	0.95183	0.758145	0.703247	0.349216	0.0224977
591520	cg17965552	X	70313663	F			N_Shore		1	0.0469479	0.0469479	1.41168	1.41168	apple up vs pear	0.202081	4.68589	0.168152	0.53827	1	0.428558	0.762911	0.331726	0.779496	0.751211	0.730931	0.455657	0.73079	0.71474	0.765229	0.715539	0.34147	0.770469	0.679685	0.690684	0.665583	0.0510201
525299	cg15844450	14	106478277	F					1	0.0471478	0.0471478	0.685564	-1.45865	apple down vs pear	-0.243258	4.6762	0.24366	0.781594	1	0.71886	0.786814	0.728567	0.743935	0.12792	0.746614	0.752794	0.779118	0.296257	0.821878	0.727556	0.80963	0.718522	0.169548	0.190441	0.74565	0.855064
651544	cg20113820	8	1765074	F	MIR596	TSS1500	Island	Unclassified_Cell_type_specific	10	0.0476169	0.0476169	1.65947	1.65947	apple up vs pear	0.210783	4.65367	0.182946	0.589682	1	0.293317	0.419113	0.417351	0.776513	0.551251	0.26479	0.124562	0.415598	0.763355	0.611122	0.431691	0.292475	0.682818	0	0.65437	0.561379	0.281728
130144	cg03767353	Y	2658057	R			Island			0.048613	0.048613	1.89236	1.89236	apple up vs pear	0.233015	4.60667	0.223572	0.727984	1	0	0.157839	0.674243	0.578562	0.159269	0.0956542	0.70616	0.320588	0.355442	0.579753	0.212513	0.267276	0.733138	0.651366	0.676511	0.394691	0.206242
178228	cg05197228	1	194337692	F					0	0.0487029	0.0487029	0.67922	-1.47228	apple down vs pear	-0.233885	4.60249	0.225244	0.734096	1	0.864856	0.826186	0.143863	0.409705	0.6753	0.560789	0.785281	0.726201	0.493506	0.00813069	0.841959	0.733448	0.333966	0.690523	0.629138	0.593079	0.740161
543404	cg16412745	14	105344761	R	KIAA0284	Body			44	0.0490069	0.0490069	0.686203	-1.45729	apple down vs pear	-0.256903	4.5884	0.271761	0.888416	1	0.838561	0.80822	0.715126	0.831014	0.226841	0.753217	0.868882	0.797884	0.115961	0.802486	0.222609	0.784694	0.24647	0.818564	0.840922	0.848986	0.828273
133904	cg03883761	3	191178924	F	PYDC2	TSS200			1	0.0497671	0.0497671	0.718383	-1.39201	apple down vs pear	-0.21471	4.55361	0.189826	0.625302	1	0.714348	0.815573	0.629956	0.770809	0	0.74506	0.695817	0.56479	0.726084	0.455933	0.674434	0.843157	0.196451	0.747411	0.711226	0.707673	0.815311
118677	cg03433448	6	24329729	F	DCDC2	Body			1	0.0499905	0.0499905	1.53109	1.53109	apple up vs pear	0.258843	4.5435	0.275881	0.910798	1	0.689363	0.0903332	0.446869	0.717039	0.759338	0.860192	0.904323	0.728479	0.852099	0.88673	0.708695	0.317782	0.809586	0.785675	0.767691	0.549646	0

## Sheet: Apple vs Pear in A_pread
Column #	Column ID	CHR	UCSC_RefGene_Name.0	UCSC_RefGene_Group.0	Relation_to_UCSC_CpG_Island	Regulatory_Feature_Group	SNP_DISTANCE.0	p-value(shape)	p-value(Apple vs. Pear)	MeanRatio(Apple vs. Pear)	FoldChange(Apple vs. Pear)	FoldChange(Apple vs. Pear) (Description)	Estimate(Apple vs. Pear)	F(shape)	SS(shape)	SS(Error)	F(Error)	201707284-01 (Intensity)	201707286-01 (Intensity)	201707304-01 (Intensity)	201707274-01 (Intensity)	201707288-01 (Intensity)	201707292-01 (Intensity)	201707294-01 (Intensity)	201707272-01 (Intensity)	201707296-01 (Intensity)	201707278-01 (Intensity)	201707298-01 (Intensity)	201707300-01 (Intensity)	201707280-01 (Intensity)	201707302-01 (Intensity)	201707282-01 (Intensity)	201707290-01 (Intensity)	201707276-01 (Intensity)
350781	cg10423996	3					1	6.25953e-06	6.25953e-06	3.49827	3.49827	Apple up vs Pear	0.367089	45.8918	0.554869	0.181362	1	0.0689256	0.301144	0.557442	0.620145	0.359638	0.0789923	0.0550538	0.392045	0.503094	0.462216	0.553405	0.0865265	0.602846	0.476041	0.613386	0.0624444	0.375474
832062	cg26614260	9					39	2.09824e-05	2.09824e-05	1.66441	1.66441	Apple up vs Pear	0.24987	36.9923	0.257085	0.104245	1	0.318763	0.500537	0.610617	0.575373	0.647234	0.288334	0.430775	0.591948	0.727398	0.70171	0.591646	0.325947	0.738315	0.433017	0.642196	0.39849	0.369684
722071	cg22718636	4	DGKQ	Body	Island	Unclassified_Cell_type_specific	4	2.32838e-05	2.32838e-05	1.91496	1.91496	Apple up vs Pear	0.208866	36.2919	0.179633	0.0742451	1	0.248021	0.32883	0.410471	0.421425	0.395205	0.170523	0.393576	0.491303	0.509254	0.418619	0.441143	0.19796	0.400289	0.440058	0.443698	0.134149	0.124901
377896	cg11281224	4					3	8.38556e-05	8.38556e-05	0.665438	-1.50277	Apple down vs Pear	-0.253273	28.4266	0.264136	0.139378	1	0.832343	0.73933	0.519863	0.348038	0.345285	0.602058	0.767663	0.585893	0.534427	0.561551	0.36677	0.743311	0.601246	0.580549	0.593931	0.830547	0.783948
865878	rs9839873							0.000109679	0.000109679	2.21388	2.21388	Apple up vs Pear	0.506417	26.9439	1.056	0.587892	1	0.543296	0.0321189	0.968405	0.962676	0.950751	0.569599	0.605707	0.957182	0.979097	0.956387	0.965611	0.577986	0.576289	0.955219	0.964455	0	0.591623
481497	cg14463736	Y	TMSB4Y	3'UTR	S_Shore			0.00013149	0.00013149	0.278771	-3.58717	Apple down vs Pear	-0.215471	25.9721	0.191172	0.11041	1	0.318282	0.432585	0.0752974	0.143627	0.0908507	0.382861	0.242483	0.109482	0.256032	0	0.0673772	0.140129	0.0333362	0	0.0568396	0.336722	0.238223
195448	cg05715076	14				Unclassified	45	0.000135104	0.000135104	1.73832	1.73832	Apple up vs Pear	0.227924	25.8288	0.213908	0.124226	1	0.535452	0.162656	0.540718	0.516821	0.526512	0.386223	0.339839	0.563354	0.532194	0.528409	0.535198	0.389105	0.545013	0.541369	0.536708	0.16262	0.185048
801593	cg25537215	18					0	0.00015354	0.00015354	1.70167	1.70167	Apple up vs Pear	0.240681	25.1602	0.238524	0.142203	1	0.37382	0.240487	0.431174	0.459317	0.596379	0.448854	0.421479	0.693294	0.591834	0.502035	0.66103	0.269867	0.720754	0.481032	0.700072	0.342854	0.303719
131529	cg03810198	17	MXRA7	Body		Unclassified_Cell_type_specific	0	0.000165597	0.000165597	0.115368	-8.66794	Apple down vs Pear	-0.410378	27.2356	0.606278	0.289387	1	0.444995	0.721594	0.0565574	0.0525012	0.0537922	0.0537116	?	0.0493067	0.0480082	0.0454854	?	0.432418	0.0671124	0.0580554	0.0508494	0.437926	0.692739
634856	cg19525261	11					25	0.000250259	0.000250259	0.139866	-7.1497	Apple down vs Pear	-0.391389	22.7103	0.630764	0.416615	1	0.149392	0.72524	0.0256803	0.0722682	0.0440812	0.0490704	0.557067	0.0370435	0.0427398	0.0968494	0.0354309	0.495102	0.103572	0.0223878	0.156383	0.52807	0.681288
403051	cg12074150	2					42	0.000278241	0.000278241	0.199526	-5.01189	Apple down vs Pear	-0.539818	22.1999	1.1999	0.810746	1	0.542101	0.807283	0.0413914	0.469055	0.0387256	0.0588756	0.783441	0.0651274	0.0457566	0.0397453	0.490456	0.838721	0.0574228	0.0509767	0.04689	0.865307	0.824882
559346	cg16908938	2	GREB1	3'UTR			20	0.000290286	0.000290286	0.701462	-1.42559	Apple down vs Pear	-0.236222	21.9979	0.229768	0.156675	1	0.812434	0.770057	0.512416	0.501055	0.482194	0.822627	0.813268	0.498264	0.517784	0.794143	0.461291	0.782045	0.804626	0.465977	0.512645	0.7516	0.786799
457661	cg13786031	9					41	0.000304734	0.000304734	1.42132	1.42132	Apple up vs Pear	0.218855	21.7677	0.197225	0.135907	1	0.41133	0.56882	0.758117	0.649675	0.782014	0.483136	0.690273	0.663646	0.811607	0.795448	0.792872	0.472115	0.809662	0.526217	0.793835	0.569016	0.441488
78672	cg02266339	3	GP5	TSS1500	S_Shelf		19	0.000313039	0.000313039	2.23651	2.23651	Apple up vs Pear	0.4162	21.641	0.71327	0.494388	1	0.727335	0.134549	0.785431	0.71024	0.738052	0.753922	0.0496137	0.74881	0.739038	0.728966	0.783003	0.257614	0.756585	0.778106	0.759689	0.172799	0.260309
526945	cg15897435	4	MRPL1	Body			0	0.000328016	0.000328016	8.55606	8.55606	Apple up vs Pear	0.316035	21.4218	0.411262	0.287975	1	0.0562251	0.0558512	0.0448028	0.424194	0.406858	0.0201164	0.0325754	0.462125	0.0274873	0.391636	0.382436	0.0464198	0.417428	0.579704	0.441931	0.0235953	0.0579943
174879	cg05096415	10	LRIT2	TSS200			0	0.000375695	0.000375695	2.69574	2.69574	Apple up vs Pear	0.359577	20.7931	0.532393	0.384064	1	0.37342	0.0802742	0.586514	0.381137	0.693337	0.53166	0	0.669603	0.644835	0.377417	0.548369	0.060988	0.637811	0.643187	0.534027	0.0528995	0.385086
442230	cg13342259	17					1	0.000396276	0.000396276	2.941	2.941	Apple up vs Pear	0.376684	20.5492	0.584258	0.426482	1	0.117288	0.519172	0.450996	0.447511	0.75925	0.0689581	0.0512624	0.486187	0.461189	0.442793	0.490812	0.459449	0.718602	0.754396	0.695781	0.0683613	0.07398
389829	cg11663691	4			S_Shelf		0	0.000443987	0.000443987	5.36772	5.36772	Apple up vs Pear	0.44792	20.0352	0.826132	0.61851	1	0.46608	0.044851	0.516295	0.51224	0.582497	0.0435335	0.0315972	0.0644805	0.537362	0.520292	0.512973	0.0427961	0.499493	0.89775	0.861337	0.0763704	0.0126379
391508	cg11716267	2	LOC375190	Body			0	0.000448813	0.000448813	0.327474	-3.05368	Apple down vs Pear	-0.392408	19.9867	0.634052	0.475855	1	0.456192	0.519288	0.0912142	0.065725	0.0461871	0.518024	0.505764	0.468936	0.460236	0.0685858	0.487007	0.813767	0.0781146	0.0666472	0.0781033	0.788663	0.482689
309200	cg09145734	10	ABLIM1	Body			0	0.000513042	0.000513042	0.545609	-1.83281	Apple down vs Pear	-0.280944	19.393	0.325004	0.251382	1	0.561515	0.446205	0.33681	0.199713	0.280491	0.696224	0.463079	0.271058	0.242708	0.48702	0.412026	0.685775	0.300891	0.61337	0.229347	0.774122	0.701092
145811	cg04234574	3	KCNMB3	TSS1500			41	0.000585896	0.000585896	2.5147	2.5147	Apple up vs Pear	0.32985	18.8142	0.448005	0.357181	1	0.525174	0	0.550317	0.595567	0.517261	0.535674	0.188028	0.631969	0.543562	0.498154	0.566492	0	0.532959	0.509334	0.530546	0	0.275486
633685	cg19485210	7	BMPER	Body	S_Shore		33	0.000636871	0.000636871	1.76282	1.76282	Apple up vs Pear	0.230693	18.4559	0.219138	0.178104	1	0.361211	0.284963	0.408475	0.585617	0.401619	0.223091	0.45748	0.72531	0.475586	0.651999	0.46618	0.221499	0.668473	0.39983	0.548044	0.339354	0.229347
544411	cg16443633	14	NRXN3	Body			0	0.000687839	0.000687839	1.45295	1.45295	Apple up vs Pear	0.204718	18.1288	0.172569	0.142786	1	0.569131	0.366531	0.604573	0.662724	0.635839	0.616352	0.328146	0.718415	0.69906	0.658382	0.654397	0.287204	0.644672	0.549047	0.73973	0.396818	0.599577
365312	cg10879348	2	LIMS1	5'UTR			49	0.000930005	0.000930005	0.541741	-1.8459	Apple down vs Pear	-0.343182	16.8802	0.484952	0.430937	1	0.779152	0.802087	0.496055	0.509379	0.499023	0.805395	0.49497	0.017412	0.501055	0.438289	0.526327	0.777547	0.511832	0.511038	0.046599	0.809659	0.773373
787534	cg25028792	19	GRIN3B	TSS1500	N_Shore		12	0.000968957	0.000968957	2.84442	2.84442	Apple up vs Pear	0.216028	16.7143	0.192163	0.172454	1	0.0721649	0.0811955	0.260956	0.088186	0.35981	0.0644916	0.0684173	0.232267	0.432635	0.289666	0.414523	0.322982	0.393141	0.386619	0.473732	0.122699	0.0879264
203138	cg05944543	Y			S_Shore			0.000983027	0.000983027	12.7101	12.7101	Apple up vs Pear	0.245018	16.6562	0.247198	0.222617	1	0.0466734	0	0.274927	0.114235	0.0309626	0	0.099792	0.335953	0.318251	0.162951	0.120175	0	0.363339	0.427246	0.511373	0	0
843996	cg27019651	18					1	0.00106643	0.00106643	0.280447	-3.56573	Apple down vs Pear	-0.237789	16.3304	0.232826	0.213859	1	0.0821364	0.533782	0.0856601	0.0460999	0.0653583	0.286346	0.235313	0.0301638	0.0536543	0.349502	0.0525874	0.479324	0.072142	0.0689532	0.102666	0.351376	0.344995
822552	cg26287822	X	ZCCHC16	5'UTR	N_Shore		0	0.00110511	0.00110511	2.8525	2.8525	Apple up vs Pear	0.462903	16.189	0.882325	0.817523	1	0.416229	0.0334076	0.71169	0.835002	0.81944	0.787652	0.418424	0.772211	0.794953	0.424136	0.358735	0.0365302	0.822534	0.720125	0.868998	0.0237891	0.0331266
183686	cg05355592	3	PTPRG	Body			3	0.0011498	0.0011498	2.18125	2.18125	Apple up vs Pear	0.485983	16.0324	0.972503	0.909877	1	0.877981	0.509013	0.888796	0.895208	0.916657	0.892356	0.514573	0.90524	0.89916	0.899276	0.89072	0.0290013	0.895009	0.909089	0.874817	0.0281201	0.0288557
425334	cg12795959	20	SIRPB1	Body				0.00121503	0.00121503	5.4349	5.4349	Apple up vs Pear	0.32405	15.816	0.432387	0.410079	1	0.200677	0.050319	0.504376	0.0631951	0.566687	0.0913852	0.0382478	0	0.419801	0.497517	0.559992	0.080535	0.530317	0.516807	0.312486	0.0503121	0
667312	cg20697683	3	GP5	TSS1500	S_Shelf		11	0.00135929	0.00135929	1.90491	1.90491	Apple up vs Pear	0.322995	15.3809	0.429575	0.418937	1	0.693302	0.413527	0.684361	0.645375	0.676158	0.691174	0.153546	0.708988	0.686492	0.702688	0.650962	0.227511	0.69881	0.669494	0.675988	0	0.319499
666941	cg20685672	2					1	0.00138775	0.00138775	1.69728	1.69728	Apple up vs Pear	0.322875	15.3013	0.429258	0.420805	1	0.578781	0.498982	0.910177	0.821474	0.909224	0.488238	0.558937	0.886768	0.545436	0.874858	0.575238	0.524571	0.890102	0.596267	0.849696	0.0375151	0.554317
552954	cg16702660	14					0	0.00147719	0.00147719	2.31199	2.31199	Apple up vs Pear	0.262641	15.0627	0.284036	0.282853	1	0.0692115	0.0714305	0.36252	0.410096	0.396168	0.0683792	0.351166	0.650971	0.574946	0.400542	0.420703	0.350348	0.404642	0.354655	0.653019	0.0719581	0.418805
756981	cg23958373	8			Island		33	0.00164689	0.00164689	1.34834	1.34834	Apple up vs Pear	0.208747	14.6522	0.179429	0.183688	1	0.534168	0.561305	0.592584	0.85889	0.809565	0.86393	0.588354	0.860007	0.884764	0.774105	0.890191	0.563989	0.670749	0.89569	0.843485	0.483877	0.599167
299185	cg08839358	2	ATL2	Body			0	0.00166862	0.00166862	2.1936	2.1936	Apple up vs Pear	0.37752	14.6031	0.586853	0.602803	1	0.752753	0.0784412	0.777111	0.72962	0.53688	0.538341	0.49233	0.823874	0.820855	0.494462	0.741213	0.102271	0.503104	0.768918	0.742028	0.0792776	0.170591
782700	cg24859648	20	BANF2	TSS200			0	0.00171214	0.00171214	0.356372	-2.80606	Apple down vs Pear	-0.221991	14.507	0.202918	0.209814	1	0.305455	0.507937	0.0538125	0.318214	0.0452436	0.306769	0.267166	0.0477565	0.0377568	0.314961	0.28693	0.252428	0.0380862	0.0397246	0.0466641	0.296543	0.478045
294381	cg08693140	7			N_Shore		0	0.00187619	0.00187619	2.07877	2.07877	Apple up vs Pear	0.270484	14.1682	0.301253	0.31894	1	0.555359	0.338303	0.549913	0.571481	0.544518	0.0666574	0.0447601	0.610158	0.5874	0.349236	0.353298	0.0423083	0.575197	0.543622	0.527361	0.349613	0.358141
834805	cg26705599	13			Island		9	0.00209299	0.00209299	0.505477	-1.97833	Apple down vs Pear	-0.371303	13.7688	0.567683	0.618443	1	0.780761	0.725933	0.0395844	0.448706	0.449483	0.783264	0.727636	0.0414878	0.712758	0.740582	0.44925	0.715664	0.427881	0.0325752	0.452964	0.761014	0.76154
490840	cg14737079	22	LOC101928891	TSS1500	N_Shore		51	0.00210886	0.00210886	0.48875	-2.04604	Apple down vs Pear	-0.419844	13.7415	0.725815	0.792289	1	0.853614	0.822112	0.623605	0.807203	0.274237	0.874942	0.523964	0.0523325	0.37318	0.135543	0.29437	0.869524	0.85969	0.20289	0.390618	0.901271	0.903053
92894	cg02675432	2	PSMD14	Body			26	0.00215222	0.00215222	0.447249	-2.23589	Apple down vs Pear	-0.498525	13.6679	1.02335	1.12308	1	0.931577	0.911178	0.883067	0.240662	0.358947	0.884238	0.881614	0.178508	0.203871	0.905429	0.0826246	0.901934	0	0.286254	0.894365	0.897407	0.905331
402078	cg12045035	15					0	0.00220964	0.00220964	1.91797	1.91797	Apple up vs Pear	0.36423	13.573	0.546263	0.603693	1	0.792918	0.0798527	0.696308	0.811867	0.781816	0.524662	0.713393	0.775826	0.699772	0.737848	0.745544	0.0910985	0.816395	0.783764	0.760962	0.0675606	0.507974
781130	cg24805360	5	LHFPL2	5'UTR		Unclassified_Cell_type_specific	0	0.00248811	0.00248811	0.555435	-1.80039	Apple down vs Pear	-0.309952	13.1496	0.395582	0.451247	1	0.701915	0.724676	0.481604	0.408286	0.501488	0.754909	0.451275	0.244328	0.703982	0.0895195	0.486243	0.783391	0.10808	0.260532	0.588438	0.712926	0.751321
758100	cg23996696	21					27	0.00253364	0.00253364	0.396097	-2.52463	Apple down vs Pear	-0.360408	13.0856	0.534858	0.613108	1	0.260138	0.721077	0.301455	0.196172	0.154597	0.766488	0.708074	0.204206	0.128703	0.740266	0.273388	0.674467	0.111051	0.132124	0.121942	0.754221	0.293123
723679	cg22779972	12	TSPAN9	5'UTR			33	0.00255538	0.00255538	0.715403	-1.39781	Apple down vs Pear	-0.233823	13.0554	0.225124	0.258656	1	0.897415	0.884265	0.657835	0.719974	0.815001	0.683299	0.824014	0.604199	0.436126	0.574134	0.591272	0.917316	0.593324	0.28743	0.598399	0.890772	0.654063
283141	cg08346443	7					0	0.00274937	0.00274937	1.51534	1.51534	Apple up vs Pear	0.287647	12.7989	0.340697	0.399289	1	0.882886	0.444813	0.81945	0.870811	0.89623	0.383801	0.871115	0.890143	0.56297	0.868424	0.913294	0.519057	0.892853	0.877299	0.866693	0.338367	0.467152
401056	cg12012426	4	KIAA1530	Body	Island		38	0.002859	0.002859	2.41097	2.41097	Apple up vs Pear	0.396137	12.6628	0.64616	0.76542	1	0.258355	0.320641	0.865711	0.872994	0.855981	0.336629	0.200214	0.247131	0.882181	0.25912	0.831686	0.291663	0.83776	0.269246	0.847122	0.30178	0.256009
93904	cg02706652	16	ERN2	Body			0	0.00309973	0.00309973	1.75964	1.75964	Apple up vs Pear	0.292535	12.384	0.352374	0.426811	1	0.405371	0.051949	0.689747	0.650986	0.702127	0.702644	0.376664	0.7152	0.646774	0.669286	0.667878	0.417239	0.664092	0.673618	0.696604	0.0480068	0.693801
244149	cg07166908	17					39	0.00320908	0.00320908	1.84621	1.84621	Apple up vs Pear	0.3713	12.2653	0.567674	0.694242	1	0	0.127491	0.816973	0.83102	0.855008	0.818473	0.708596	0.824962	0.73582	0.724668	0.855549	0.287234	0.809969	0.791004	0.855836	0.802574	0.327098
246433	cg07234876	8			Island		25	0.00322204	0.00322204	1.42333	1.42333	Apple up vs Pear	0.260154	12.579	0.253801	0.282472	1	0.53307	0.541262	0.595994	0.946174	0.893678	0.943539	0.550132	0.95847	0.942277	0.850022	0.947323	0.527733	0.689621	0.962847	0.960572	?	0.591525
29010	cg00814218	14	SLC25A21	Body		Unclassified_Cell_type_specific	0	0.00328069	0.00328069	3.12573	3.12573	Apple up vs Pear	0.225877	12.1901	0.210084	0.258509	1	0.283853	0.070771	0.223505	0.288937	0.557404	0.212697	0.0276941	0.306666	0.0515492	0.461891	0.43466	0.0452916	0.464711	0.242669	0.289356	0.0518656	0.0516342
447874	cg13506281	13	MTUS2	Body	Island		25	0.00334843	0.00334843	1.85303	1.85303	Apple up vs Pear	0.344298	12.1207	0.488111	0.604064	1	0.8368	0.375899	0.823212	0.425408	0.848839	0.381524	0.381936	0.835089	0.796493	0.870183	0.812549	0.411363	0.404528	0.827151	0.835726	0.399932	0.0378847
248820	cg07308158	2	CNNM3	Body			0	0.00344075	0.00344075	2.36571	2.36571	Apple up vs Pear	0.422936	12.0286	0.736544	0.918494	1	0.472109	0.0510095	0.838543	0.453696	0.817167	0.779171	0.754795	0.496244	0.685636	0.818653	0.774814	0.0282527	0.816471	0.814758	0.810213	0.0347441	0.0477011
605544	cg18455878	12	VDR	Body			0	0.00345902	0.00345902	0.436446	-2.29123	Apple down vs Pear	-0.382171	12.0107	0.601402	0.751085	1	0.777676	0.780457	0.751159	0.392986	0.429022	0.412441	0.785557	0.419286	0.0351776	0.0418007	0.0325778	0.781613	0.400425	0.430549	0.0267501	0.797054	0.412215
480987	cg14449263	4					0	0.00351694	0.00351694	2.19702	2.19702	Apple up vs Pear	0.348345	11.9546	0.499652	0.626935	1	0.721666	0.0304031	0.722527	0.428378	0.754371	0.379697	0.409766	0.761449	0.661427	0.75735	0.432703	0.0326867	0.746356	0.705135	0.423844	0.0328627	0.429984
276921	cg08159412	4						0.00357584	0.00357584	1.90795	1.90795	Apple up vs Pear	0.353988	11.8987	0.515973	0.650456	1	0.311189	0.685816	0.727548	0.738388	0.733691	0.151733	0.725452	0.790281	0.78655	0.692811	0.725957	0.0932238	0.733886	0.727992	0.781562	0	0.761734
673509	cg20929984	5					1	0.00358711	0.00358711	2.2481	2.2481	Apple up vs Pear	0.418796	12.1987	0.690598	0.792573	1	0.828459	0.122837	0.866027	0.79631	0.821214	0.315156	0.692101	0.828184	0.744662	0.318886	0.761959	0.130166	0.908586	?	0.743265	0.208605	0.0515115
570481	cg17265515	8	ERICH1	Body			1	0.00365335	0.00365335	0.63437	-1.57637	Apple down vs Pear	-0.263235	11.8268	0.285323	0.361879	1	0.72824	0.790498	0.753248	0.420152	0.581034	0.55631	0.784839	0.301485	0.349508	0.186032	0.268382	0.708492	0.71977	0.529219	0.458321	0.706387	0.764886
445635	cg13443681	3					47	0.00372177	0.00372177	4.91959	4.91959	Apple up vs Pear	0.454328	11.7646	0.84994	1.08368	1	0.0548726	0.025794	0.0379085	0.0856319	0.845807	0.0594791	0.0457792	0.492031	0.796933	0.481761	0.807946	0.0409766	0.829149	0.891538	0.433697	0.505574	0.0789101
448648	cg13528314	4	CD38	Body			2	0.00372321	0.00372321	2.06082	2.06082	Apple up vs Pear	0.336629	11.7634	0.466608	0.594994	1	0.629757	0	0.717376	0.622015	0.782134	0.584149	0.372687	0.65159	0.603695	0.607469	0.68226	0.565675	0.724179	0.406799	0.742057	0.0388629	0.0301669
519314	cg15657730	20	PLCB1	Body			0	0.00382266	0.00382266	1.29683	1.29683	Apple up vs Pear	0.204901	11.6754	0.172878	0.222105	1	0.932332	0.520582	0.895105	0.899962	0.913574	0.876851	0.870006	0.902539	0.901834	0.891827	0.898238	0.520781	0.881176	0.871916	0.895852	0.582963	0.528591
824366	cg26347222	7	BMPER	Body	S_Shore		42	0.00389325	0.00389325	1.59563	1.59563	Apple up vs Pear	0.212542	11.6145	0.18601	0.24023	1	0.37941	0.302664	0.439219	0.636374	0.521059	0.256483	0.595131	0.697003	0.4863	0.688614	0.445485	0.270933	0.640675	0.386083	0.752948	0.428592	0.264628
712120	cg22349483	10	CELF2	Body			2	0.00393762	0.00393762	0.307489	-3.25215	Apple down vs Pear	-0.400913	11.5769	0.661836	0.857528	1	0.0634084	0.872253	0.202041	0	0.216639	0.31912	0.855519	0.174354	0.311575	0.293994	0.21698	0.2453	0.238584	0	0.125973	0.832754	0.864137
714775	cg22453403	7	DENND2A	Body				0.00396488	0.00396488	1.61637	1.61637	Apple up vs Pear	0.201296	11.5541	0.166848	0.216609	1	0.171415	0.200552	0.502595	0.449673	0.700434	0.310497	0.415891	0.565532	0.488047	0.612757	0.441654	0.279393	0.535134	0.295735	0.68726	0.461473	0.446881
200539	cg05873137	17						0.00397277	0.00397277	1.61561	1.61561	Apple up vs Pear	0.207621	11.5475	0.177497	0.230566	1	0.44057	0.433072	0.673873	0.622237	0.63585	0.103614	0.433212	0.420042	0.433695	0.465056	0.603615	0.467083	0.442507	0.684848	0.467094	0.300734	0.18254
822718	cg26294145	14					2	0.00409662	0.00409662	0.347557	-2.87722	Apple down vs Pear	-0.268954	11.446	0.297856	0.39034	1	0.237829	0.604921	0.0365942	0.0583765	0.148209	0.112583	0.153289	0.0979014	0.177833	0.109578	0.202626	0.477707	0.109995	0.233728	0.257883	0.648255	0.651002
487377	cg14629612	21	HLCS	Body			2	0.00418623	0.00418623	2.16755	2.16755	Apple up vs Pear	0.45345	11.3748	0.846657	1.11649	1	0.0545389	0.846023	0.861566	0.81569	0.86094	0.832109	0	0.821984	0.852186	0.880077	0.807419	0.860083	0.839228	0.86222	0.816959	0.125886	0
865866	rs715359							0.00422574	0.00422574	2.31289	2.31289	Apple up vs Pear	0.465768	11.3439	0.893281	1.18118	1	0.948804	0.0318463	0.961826	0.971047	0.969789	0.472424	0.473979	0.481879	0.491391	0.954852	0.958548	0.0374175	0.956026	0.491798	0.968166	0.487318	0.0315614
79231	cg02282391	21	PCNT	ExonBnd			47	0.00435753	0.00435753	0.421459	-2.37271	Apple down vs Pear	-0.527858	11.5248	1.09712	1.33275	1	0.95029	0.893082	0.275189	0.924253	0.904877	0.917359	0.875906	?	0.119214	0.917914	0	0.891352	0.00667128	0.107019	0.205704	0.932989	0.925797
39416	cg01111656	13	PCCA	Body		Unclassified	37	0.00436302	0.00436302	2.04944	2.04944	Apple up vs Pear	0.493952	11.2392	1.00466	1.34084	1	0	0.268463	0.957085	0.954034	0.966502	0.973565	0	0.966193	0.980747	0.953996	0.963743	0.126828	0.952017	0.970062	0.98194	0.96743	0.958473
17461	cg00491047	14	EFS	Body	N_Shelf		2	0.00440754	0.00440754	3.04397	3.04397	Apple up vs Pear	0.470033	11.206	0.909716	1.21772	1	0.177917	0.18984	0.817554	0.829468	0.834282	0.829658	0.153769	0.861496	0.841296	0.811575	0.839772	0	0.164257	0.136803	0.863437	0.222091	0.0364526
206516	cg06047886	8	KBTBD11	5'UTR	N_Shelf	Unclassified_Cell_type_specific	47	0.00451075	0.00451075	0.611601	-1.63505	Apple down vs Pear	-0.225855	11.1306	0.210043	0.283061	1	0.368877	0.761265	0.376689	0.61656	0.318095	0.389738	0.613107	0.337381	0.289471	0.4311	0.176773	0.66139	0.374084	0.261338	0.374984	0.766607	0.509532
381895	cg11405538	5					26	0.00470122	0.00470122	1.34189	1.34189	Apple up vs Pear	0.222084	10.9964	0.203088	0.277028	1	0.92437	0.461589	0.867702	0.942734	0.950298	0.576725	0.536815	0.950883	0.882812	0.941144	0.77847	0.762004	0.626493	0.933397	0.842606	0.783267	0.50222
274422	cg08084984	16	XYLT1	Body			0	0.00470128	0.00470128	9.52292	9.52292	Apple up vs Pear	0.401085	10.9964	0.662404	0.903574	1	0.0433984	0.0477064	0.0463795	0.0473514	0.464196	0.0589215	0.0299977	0.0515639	0.473498	0.837776	0.819746	0.0473	0.45357	0.475661	0.811709	0.0497401	0.0523534
722698	cg22741595	11	C11orf67	5'UTR	S_Shore	Promoter_Associated	8	0.00470321	0.00470321	0.122086	-8.19094	Apple down vs Pear	-0.300638	10.9951	0.372167	0.507728	1	0.527787	0.0467804	0.0841214	0.0414169	0.0472028	0.596077	0.017251	0.0303652	0.0250062	0.0251715	0.0295265	0.545562	0.019966	0.0470775	0.0682256	0.0398289	0.623838
437287	cg13183651	17	KRTAP3-3	TSS1500			0	0.0048495	0.0048495	1.53081	1.53081	Apple up vs Pear	0.221686	10.8962	0.202361	0.278574	1	0.327461	0.389926	0.6241	0.623899	0.630469	0.625418	0.644901	0.646738	0.644494	0.622585	0.651268	0.558601	0.652003	0.660196	0.637515	0.0330204	0.344156
464782	cg13989295	17	SKA2	3'UTR	S_Shelf		1	0.00486058	0.00486058	4.11075	4.11075	Apple up vs Pear	0.271838	10.8889	0.304276	0.419156	1	0.0548302	0.0267284	0.0569562	0.383054	0.378788	0.373726	0.00714516	0.0361106	0.397521	0.606271	0.349467	0.0465926	0.38496	0.393983	0.605127	0.0452894	0.0573929
206902	cg06060457	22					9	0.00505234	0.00505234	0.504133	-1.9836	Apple down vs Pear	-0.22719	10.7647	0.212534	0.296154	1	0.328932	0.351878	0.321665	0.0520089	0.509225	0.510088	0.534692	0.0464134	0.304647	0.0341305	0.0606597	0.475927	0.313803	0.349265	0.31796	0.534107	0.47155
605587	cg18457108	3	C3orf21	Body			0	0.00508612	0.00508612	2.07528	2.07528	Apple up vs Pear	0.344208	10.7434	0.487854	0.681146	1	0.770431	0.435498	0.771339	0.753358	0.431341	0.427434	0.0502198	0.753527	0.77833	0.414804	0.756182	0.428616	0.76204	0.780688	0.441571	0.0640928	0.0644837
195087	cg05704942	1	MRTO4	Body	S_Shelf		1	0.00510159	0.00510159	0.490689	-2.03795	Apple down vs Pear	-0.299507	10.7337	0.369372	0.516187	1	0.675186	0.646247	0.607577	0.412707	0.385751	0.38412	0.742773	0.402772	0.435223	0.0497577	0.0540283	0.622493	0.427154	0.0490723	0.061524	0.642519	0.40311
529290	cg15974300	21					1	0.00517279	0.00517279	1.54374	1.54374	Apple up vs Pear	0.290613	10.6894	0.347759	0.487996	1	0.834758	0.399287	0.806553	0.85838	0.838717	0.817402	0.257407	0.833877	0.839995	0.811976	0.839938	0.839454	0.773657	0.832838	0.81492	0.221261	0.371738
639979	cg19707454	7	ZDHHC4	TSS1500	N_Shore		4	0.00531016	0.00531016	2.53767	2.53767	Apple up vs Pear	0.260235	10.6059	0.278857	0.394388	1	0.209314	0.188058	0.281574	0.21419	0.552454	0.16024	0.181661	0.225079	0.388754	0.437078	0.228894	0.185057	0.506082	0.598576	0.862077	0.119936	0.140416
145948	cg04238896	22	NCF4	Body			1	0.00533997	0.00533997	0.694114	-1.44069	Apple down vs Pear	-0.218924	10.5882	0.197349	0.279581	1	0.712437	0.726944	0.653822	0.322417	0.314456	0.739059	0.711098	0.611436	0.342553	0.431239	0.758456	0.65768	0.375755	0.431818	0.725847	0.784611	0.678097
242595	cg07124183	5					0	0.00537568	0.00537568	1.74608	1.74608	Apple up vs Pear	0.322207	10.567	0.427482	0.606817	1	0.7068	0.727888	0.742746	0.702258	0.789215	0.756015	0.0251869	0.750728	0.768293	0.727199	0.739344	0.0283257	0.762474	0.77048	0.787987	0.390134	0.388712
511436	cg15402732	5	CEP72	Body	N_Shelf		43	0.00560036	0.00560036	1.37908	1.37908	Apple up vs Pear	0.232823	10.4375	0.223204	0.320773	1	0.846667	0.447311	0.855835	0.864371	0.844148	0.861995	0.872821	0.820473	0.846078	0.838631	0.847704	0.424847	0.84812	0.858784	0.845905	0.413355	0.432275
855209	cg27403073	16				Unclassified	47	0.00582652	0.00582652	0.187781	-5.32535	Apple down vs Pear	-0.234663	10.3129	0.226746	0.329798	1	0.439432	0.236535	0.061157	0.0350369	0	0	0.298032	0.0850273	0.168939	0	0.055226	0.471858	0.0336987	0.0644921	0.0389529	0	0.576556
233000	cg06844719	16					1	0.00583676	0.00583676	1.87525	1.87525	Apple up vs Pear	0.242458	10.3074	0.24206	0.35226	1	0.198863	0.120792	0.481567	0.540637	0.598621	0.536288	0.180035	0.593129	0.147601	0.568136	0.573833	0.516077	0.603262	0.549474	0.538468	0.128108	0.25894
663687	cg20566384	19	MED16	Body	S_Shore		0	0.0059405	0.0059405	0.534993	-1.86918	Apple down vs Pear	-0.388983	10.2523	0.623032	0.911553	1	0.8362	0.820976	0.0610373	0.844069	0.830301	0.857736	0.883889	0.406848	0.427215	0.0403002	0.788306	0.810628	0.0461329	0.510869	0.520188	0.825104	0.821037
842701	cg26975184	7	DENND2A	Body			43	0.00608226	0.00608226	1.7655	1.7655	Apple up vs Pear	0.226242	10.1786	0.210764	0.310597	1	0.331426	0.157226	0.376891	0.298274	0.499001	0.236932	0.513485	0.754614	0.643796	0.533762	0.287075	0.219953	0.662531	0.526573	0.63537	0.354006	0.255798
529237	cg15972370	7	TPK1	Body			0	0.00622361	0.00622361	1.70471	1.70471	Apple up vs Pear	0.344778	10.1071	0.489471	0.726424	1	0.82392	0.00939381	0.814633	0.824752	0.880982	0.865996	0.56329	0.844617	0.798229	0.84019	0.819085	0.556374	0.831396	0.808991	0.877362	0.0236546	0.582094
159227	cg04636193	6	LRRC16A	Body			0	0.00628924	0.00628924	1.75133	1.75133	Apple up vs Pear	0.375135	10.0746	0.579461	0.862758	1	0.547775	0.0482252	0.905112	0.906637	0.925389	0.906018	0.920779	0.574179	0.917969	0.913273	0.899655	0.542477	0.891199	0.902447	0.908433	0.0400275	0.48976
652220	cg20139683	12	POLE	Body	Island		49	0.00636496	0.00636496	2.37498	2.37498	Apple up vs Pear	0.455396	10.0375	0.853941	1.27613	1	0.837869	0.830316	0.875121	0.0808166	0.868294	0.0893429	0.0627417	0.862226	0.876882	0.872463	0.844827	0.143612	0.860121	0.889104	0.836138	0.149734	0.204804
247220	cg07258983	18			N_Shelf		0	0.00645049	0.00645049	1.53969	1.53969	Apple up vs Pear	0.308919	9.99617	0.392951	0.589652	1	0.536649	0.0549225	0.901002	0.921825	0.572277	0.901778	0.539216	0.906464	0.920765	0.909461	0.930525	0.550832	0.913802	0.919745	0.917318	0.531475	0.891925
563000	cg17026763	1	NPHP4	Body	S_Shelf		22	0.00648023	0.00648023	1.33741	1.33741	Apple up vs Pear	0.225862	9.98196	0.210056	0.315654	1	0.431404	0.908025	0.888457	0.91112	0.882404	0.475256	0.577747	0.899246	0.901893	0.904034	0.911254	0.473473	0.89194	0.898345	0.863889	0.912877	0.90699
459469	cg13837834	5						0.00651375	0.00651375	1.99802	1.99802	Apple up vs Pear	0.306029	9.96603	0.385632	0.58042	1	0.573987	0.192863	0.618761	0.668032	0.622553	0.603679	0.444076	0.660766	0.711341	0.673974	0.678039	0.136141	0.590819	0.137817	0.764545	0.110448	0.0852593
198600	cg05812602	Y	USP9Y	Body				0.00661975	0.00661975	0.445767	-2.24333	Apple down vs Pear	-0.215034	9.91627	0.190399	0.28801	1	0.61395	0.399256	0.16199	0.193381	0.197469	0.285705	0.422226	0.435578	0.152766	0.190958	0.122139	0.502741	0.199306	0.0759204	0	0.0753355	0.416681
208351	cg06101792	17	AATF	Body			1	0.00682454	0.00682454	0.542047	-1.84486	Apple down vs Pear	-0.353534	9.82265	0.514649	0.785911	1	0.799186	0.849369	0.116483	0.810027	0.196241	0.398766	0.864224	0.321787	0.23987	0.417224	0.246848	0.812469	0.304855	0.795081	0.736122	0.828561	0.851338
78198	cg02252289	2	AGAP1	Body			30	0.00694892	0.00694892	0.729725	-1.37038	Apple down vs Pear	-0.209196	9.76734	0.1802	0.276738	1	0.808313	0.793507	0.486402	0.762379	0.468237	0.558393	0.841248	0.86935	0.578067	0.499172	0.482379	0.813726	0.513283	0.337691	0.651177	0.822163	0.780715
67345	cg01933473	1	EXOSC10	Body			1	0.006991	0.006991	0.494323	-2.02297	Apple down vs Pear	-0.40221	9.74889	0.666124	1.02492	1	0.744872	0.771679	0.258468	0.761073	0	0.773611	0.910642	0.200272	0.101982	0.744017	0.789257	0.786972	0.0444616	0.785008	0.24726	0.816806	0.763146
506442	cg15234083	Y						0.00715652	0.00715652	0.209246	-4.77905	Apple down vs Pear	-0.20846	9.67752	0.178934	0.277345	1	0.23291	0.321761	0.0227943	0.0554183	0	0	0.424974	0.158069	0	0.0171657	0.298171	0.360065	0	0	0	0.453577	0.0520625
332546	cg09863391	17					49	0.00717118	0.00717118	0.598854	-1.66986	Apple down vs Pear	-0.221499	9.67128	0.20202	0.313329	1	0.364254	0.609837	0.350271	0.35532	0.0302809	0.563043	0.607878	0.434644	0.389327	0.589885	0.372631	0.534617	0.390968	0.0341129	0.359227	0.615552	0.569978
475446	cg14289956	6	PPARD	5'UTR			1	0.00719669	0.00719669	1.54274	1.54274	Apple up vs Pear	0.267612	9.66048	0.294889	0.45788	1	0.75958	0.482578	0.784691	0.495535	0.798472	0.788325	0.454173	0.802474	0.802291	0.783013	0.776716	0.439821	0.794406	0.802206	0.767051	0.498455	0.0285856
253126	cg07437923	16	DNAJA3	3'UTR			2	0.00744668	0.00744668	0.325652	-3.07076	Apple down vs Pear	-0.260423	9.55684	0.279259	0.438313	1	0.426731	0.453413	0.0531279	0.0437252	0.0522202	0.413298	0.0152422	0.041835	0.441456	0.472125	0.0438729	0.466611	0.0337876	0.0341202	0.0413475	0.448838	0.479159
689993	cg21524061	4	TLR6	3'UTR			1	0.00746466	0.00746466	1.59415	1.59415	Apple up vs Pear	0.29361	9.54954	0.35497	0.557571	1	0.815688	0.453623	0.813798	0.840282	0.832446	0.836097	0.405277	0.804817	0.795811	0.462885	0.832604	0.454042	0.821825	0.835387	0.837969	0.0412257	0.453251
230248	cg06766860	12	GALNT9	Body	N_Shore		4	0.00760612	0.00760612	1.46106	1.46106	Apple up vs Pear	0.249906	9.70171	0.234199	0.337959	1	0.458517	0.722217	0.781012	0.768409	0.800834	0.827473	0.383546	0.849011	0.837484	0.798895	0.822182	0.438062	0.433677	0.88534	0.942503	0.422357	?
347744	cg10326673	2	LCLAT1	TSS1500	N_Shore	Promoter_Associated	23	0.00775198	0.00775198	2.48148	2.48148	Apple up vs Pear	0.263439	9.43554	0.285764	0.454289	1	0.176763	0.196968	0.202723	0.202008	0.198122	0.199719	0.149592	0.528407	0.568175	0.203662	0.538496	0.194927	0.558487	0.574835	0.83769	0.150592	0.176193
865857	rs5926356							0.00782181	0.00782181	0.447342	-2.23543	Apple down vs Pear	-0.423884	9.40857	0.73985	1.17954	1	0.523485	0.967153	0.45036	0.438455	0.466116	0.483703	0.51261	0.477268	0.0378355	0.961202	0.028722	0.968634	0.053977	0.478576	0.0385698	0.949455	0.963906
865853	rs3936238							0.00785725	0.00785725	0.417878	-2.39305	Apple down vs Pear	-0.435281	9.39499	0.78017	1.24562	1	0.456911	0.952062	0.0535433	0.466071	0.0587009	0.955859	0.469039	0.477206	0.962222	0.0545143	0.460758	0.490973	0.472014	0.0414896	0.078156	0.959104	0.950293
711075	cg22309983	17	TRPV1	TSS1500			49	0.00800747	0.00800747	1.70064	1.70064	Apple up vs Pear	0.288763	9.33817	0.343347	0.551522	1	0.615869	0.0387506	0.540025	0.661169	0.748011	0.671495	0.718399	0.792538	0.82795	0.668909	0.704179	0.393452	0.652431	0.762299	0.651517	0.416134	0.0308765
33966	cg00958775	2					0	0.00810469	0.00810469	0.46416	-2.15443	Apple down vs Pear	-0.265277	9.30205	0.289766	0.467262	1	0.209856	0.472715	0.157435	0.367269	0.440959	0.18133	0.677235	0.135248	0.13147	0.142567	0.15797	0.658397	0.131534	0.495849	0.137607	0.63805	0.62789
629017	cg19311470	4	RPL9	TSS1500	Island	Promoter_Associated	0	0.00828182	0.00828182	4.45621	4.45621	Apple up vs Pear	0.398319	9.23749	0.653297	1.06083	1	0.536478	0.0527144	0.96293	0.508784	0.535516	0.0475463	0.0177373	0.971672	0.52982	0.521981	0.0449073	0.0512696	0.499844	0.0440515	0.516155	0.0527116	0.0482741
676849	cg21045468	5					40	0.00837709	0.00837709	0.289934	-3.44906	Apple down vs Pear	-0.221605	9.20342	0.202212	0.329571	1	0.350901	0.3531	0.136878	0.0702811	0.0813065	0.0821048	0.0931134	0.0790092	0.104613	0.0879473	0.084177	0.652659	0.080473	0.134134	0.0460372	0.552364	0.10039
560620	cg16950711	5					44	0.00838011	0.00838011	1.62558	1.62558	Apple up vs Pear	0.289641	9.20235	0.345436	0.563067	1	0.789793	0.089003	0.688756	0.81498	0.777622	0.744133	0.681249	0.742397	0.788325	0.734409	0.730983	0.379349	0.794051	0.691472	0.763374	0.500619	0.0568277
548087	cg16556401	3	MB21D2	Body		Unclassified	1	0.00851807	0.00851807	0.523499	-1.91022	Apple down vs Pear	-0.284075	9.15381	0.332288	0.544508	1	0.531202	0.506181	0.224942	0.261274	0.284514	0.190571	0.497554	0.326003	0.244247	0.279865	0.299406	0.514149	0.338914	0.55472	0.307054	0.965858	0.967666
559021	cg16899969	3			N_Shelf		35	0.00852464	0.00852464	1.94464	1.94464	Apple up vs Pear	0.317374	9.15152	0.414754	0.679812	1	0.681484	0.0935388	0.662454	0.62442	0.670638	0.641382	0.74398	0.714561	0.644208	0.655596	0.642899	0.0238444	0.684348	0.579196	0.655152	0.0305262	0.13706
816131	cg26069044	11	NRGN	Body	N_Shore		50	0.00865394	0.00865394	1.75805	1.75805	Apple up vs Pear	0.244837	9.30103	0.236035	0.355282	1	0.0374787	0.44953	0.652015	0.459168	0.490734	0.435338	0.427383	0.452495	0.712468	0.733659	0.705866	0.411925	0.473183	0.430807	?	0.0468743	0.45236
865830	rs133860							0.0086808	0.0086808	3.46619	3.46619	Apple up vs Pear	0.379226	9.0977	0.59217	0.976351	1	0.486515	0.0212341	0.950524	0.00911257	0.955235	0.0155904	0.510339	0.522697	0.475202	0.477601	0.47935	0.00994795	0.481985	0.474153	0.504103	0.0122819	0.0204807
44247	cg01252526	16	WDR90	Body	N_Shore	Gene_Associated	3	0.00875964	0.00875964	2.80796	2.80796	Apple up vs Pear	0.222346	9.07095	0.203566	0.336624	1	0.146297	0.0864639	0.404704	0.18784	0.100731	0.283403	0.214856	0.36175	0.498631	0.321462	0.498354	0.0205008	0.425019	0.588005	0.0667754	0.0231393	0.086211
343454	cg10195365	3	FLNB	Body			0	0.00878256	0.00878256	2.5923	2.5923	Apple up vs Pear	0.310797	9.06323	0.397743	0.65828	1	0.428679	0.0403888	0.637537	0.638096	0.694422	0.0327021	0.406285	0.438846	0.688252	0.395862	0.418611	0.0244899	0.400488	0.716907	0.0308179	0.403426	0.0303391
78973	cg02275226	11			S_Shelf		50	0.00892757	0.00892757	1.49453	1.49453	Apple up vs Pear	0.248586	9.01487	0.254449	0.423382	1	0.464561	0.783122	0.677261	0.811782	0.764117	0.745405	0.379638	0.804975	0.735108	0.775759	0.754632	0.625766	0.798369	0.61084	0.779764	0.484385	0.0358497
211276	cg06193597	2					4	0.00917608	0.00917608	0.322705	-3.0988	Apple down vs Pear	-0.440315	8.93407	0.798318	1.34035	1	0.902713	0.711017	0.889373	0.06202	0.0673083	0.0639697	0.937263	0.0841467	0.070232	0.0443858	0.0518756	0.620359	0.0658363	0.085976	0.676778	0.666412	0.649021
653912	cg20205188	10	ADARB2	Body	N_Shore		34	0.00927187	0.00927187	0.564874	-1.77031	Apple down vs Pear	-0.273016	8.9036	0.306919	0.51707	1	0.646815	0.645171	0.406714	0.407835	0.419199	0.39824	0.666013	0.0543036	0.394468	0.625591	0.0705792	0.686317	0.686208	0.415812	0.0635352	0.68875	0.660775
192894	cg05638439	16	WDR90	Body	Island	Gene_Associated	1	0.00928023	0.00928023	1.66739	1.66739	Apple up vs Pear	0.224401	8.90095	0.207347	0.349424	1	0.389823	0.191894	0.639663	0.427984	0.271785	0.463809	0.442302	0.57137	0.698336	0.533137	0.667966	0.202084	0.690232	0.802463	0.303426	0.338806	0.324929
97863	cg02822944	8	DNAJC5B	5'UTR		Unclassified_Cell_type_specific	0	0.00936699	0.00936699	1.79549	1.79549	Apple up vs Pear	0.350056	9.05914	0.459522	0.710146	1	0.835331	0.467784	0.824787	0.501958	0.821806	0.798377	?	0.805048	0.836419	0.818035	0.799761	0.0390165	0.834679	0.831791	0.826778	0.0284927	0.471299
117512	cg03398919	2					35	0.00939189	0.00939189	0.488808	-2.04579	Apple down vs Pear	-0.403756	8.86592	0.671254	1.13568	1	0.850599	0.745998	0.816286	0.759654	0	0.787159	0.817725	0.121861	0.766469	0.092449	0.084525	0.792982	0.205226	0.824037	0.190261	0.763517	0.77085
274969	cg08101922	7			N_Shelf		13	0.00946324	0.00946324	1.67469	1.67469	Apple up vs Pear	0.247879	8.84377	0.253004	0.429122	1	0.403997	0.415199	0.411365	0.686855	0.711937	0.675088	0.46957	0.695598	0.456331	0.664246	0.661492	0.0749156	0.449262	0.703293	0.712377	0.463289	0.0697203
519133	cg15652532	2	LCLAT1	TSS1500	N_Shore	Promoter_Associated	25	0.00975859	0.00975859	2.18831	2.18831	Apple up vs Pear	0.250193	8.75412	0.25775	0.441649	1	0.208738	0.221838	0.243452	0.221876	0.201214	0.239518	0.193402	0.582201	0.554235	0.224378	0.566759	0.2198	0.596345	0.57602	0.840885	0.168632	0.221881
534706	cg16145187	17					48	0.009793	0.009793	2.25743	2.25743	Apple up vs Pear	0.338965	8.74388	0.473106	0.811608	1	0.0254208	0.0354238	0.711213	0.69476	0.461529	0.468617	0.433673	0.779672	0.729892	0.429722	0.72428	0.0289057	0.759887	0.762718	0.0316802	0.469708	0.425244
614026	cg18759144	4	CYP2U1	3'UTR			46	0.00994174	0.00994174	1.67566	1.67566	Apple up vs Pear	0.335444	8.70007	0.463329	0.798837	1	0.815042	0	0.811361	0.766138	0.859269	0.317539	0.862277	0.804448	0.861338	0.813443	0.829567	0.915681	0.840162	0.921179	0.812236	0.311841	0.252908
602005	cg18330031	5	KCNN2	Body			10	0.00995151	0.00995151	0.476105	-2.10038	Apple down vs Pear	-0.354172	8.69722	0.516507	0.890815	1	0.118603	0.768512	0.270234	0.856616	0.280268	0.589268	0.78708	0.560456	0.164467	0.15095	0.31019	0.753059	0.0875657	0.361505	0.176385	0.874937	0.840788
836271	cg26757229	11	BIRC3	5'UTR	S_Shelf		44	0.00995301	0.00995301	0.605934	-1.65035	Apple down vs Pear	-0.351392	8.69678	0.508431	0.876929	1	0.890959	0.882376	0.898677	0.887135	0.560498	0.873901	0.903181	0.542376	0.023077	0.562687	0.0533746	0.905781	0.536897	0.45961	0.878819	0.913089	0.87266
8563	cg00239353	16	IL32	TSS1500			0	0.0100942	0.0100942	0.403295	-2.47958	Apple down vs Pear	-0.207432	8.65595	0.177174	0.307026	1	0.129027	0.533441	0.153918	0.102848	0.156015	0.360135	0.077333	0.158439	0.320374	0.0756603	0.0628227	0.300678	0.120855	0.163051	0.087982	0.368191	0.664591
845682	cg27076160	10	ZNF365	3'UTR			33	0.010154	0.010154	1.8703	1.8703	Apple up vs Pear	0.324281	8.63884	0.433004	0.751843	1	0.445501	0.0642692	0.705596	0.803486	0.760506	0.730187	0.783138	0.458046	0.437324	0.752589	0.737436	0.0625613	0.762243	0.739567	0.812108	0.0740439	0.448564
798341	cg25420101	5	WDR41	Body	N_Shelf		1	0.0101824	0.0101824	2.04679	2.04679	Apple up vs Pear	0.292196	8.63076	0.351559	0.610999	1	0.295611	0.273886	0.255756	0.254019	0.827924	0.237667	0.120979	0.837217	0.540661	0.28212	0.78226	0.524037	0.572022	0.808123	0.553227	0.258309	0.243467
186795	cg05450204	18					0	0.0103403	0.0103403	1.45755	1.45755	Apple up vs Pear	0.269687	8.5863	0.29948	0.523183	1	0.862551	0.533854	0.833115	0.875498	0.890316	0.864769	0.466097	0.89192	0.810802	0.886653	0.868969	0.803877	0.888243	0.773555	0.871884	0.545709	0.0490027
388631	cg11627968	7	HIPK2	Body			0	0.0104056	0.0104056	1.4648	1.4648	Apple up vs Pear	0.287754	8.56813	0.340951	0.596893	1	0.897788	0.0548616	0.926066	0.921704	0.905879	0.884631	0.933982	0.893393	0.905576	0.902314	0.881286	0.541983	0.912122	0.905352	0.914812	0.511569	0.50886
596568	cg18137779	1					47	0.0104797	0.0104797	0.696536	-1.43568	Apple down vs Pear	-0.272395	8.5477	0.305527	0.536156	1	0.91633	0.916372	0.907315	0.891931	0.527379	0.893313	0.868431	0.49797	0.884094	0.442175	0.906777	0.907967	0.521847	0.352448	0.320307	0.886111	0.894817
158553	cg04613734	8	TRPS1	5'UTR	S_Shelf		25	0.010647	0.010647	0.63821	-1.56688	Apple down vs Pear	-0.289458	8.50212	0.345	0.608672	1	0.512118	0.894404	0.529674	0.496838	0.518002	0.907414	0.929105	0.51905	0.521652	0.539531	0.524954	0.898575	0.91849	0.507079	0.0308749	0.917378	0.541511
456446	cg13749548	14			N_Shelf		28	0.0107892	0.0107892	0.363532	-2.75079	Apple down vs Pear	-0.460339	8.63463	0.834402	1.35288	1	0.0284072	0.917264	0.550071	0.519749	0.528819	0.473597	0.922799	?	0.00801942	0.011823	0.0443532	0.887587	0.0384223	0.627044	0.0380833	0.911851	0.921387
443121	cg13370086	1	TTC22	Body			50	0.011197	0.011197	0.762614	-1.31128	Apple down vs Pear	-0.21503	8.35791	0.190392	0.341697	1	0.922246	0.884132	0.89702	0.569611	0.915043	0.906557	0.906305	0.554278	0.586384	0.5182	0.527142	0.882108	0.933	0.49488	0.912402	0.930692	0.908743
43189	cg01221582	14	BRF1	Body			50	0.011299	0.011299	1.48485	1.48485	Apple up vs Pear	0.26002	8.33207	0.278396	0.501189	1	0.761252	0.0181078	0.771215	0.787185	0.792258	0.817692	0.811647	0.81273	0.832832	0.81186	0.786112	0.438042	0.802796	0.801236	0.764826	0.455021	0.452233
399184	cg11951968	6					2	0.0114984	0.0114984	1.70409	1.70409	Apple up vs Pear	0.353736	8.2823	0.515239	0.933144	1	0.782206	0.0565402	0.855958	0.850514	0.860363	0.767409	0.877778	0.868529	0.878007	0.834825	0.880117	0.0528441	0.881292	0.775196	0.876602	0.148556	0.831495
641669	cg19764206	7	ANKRD61	TSS200				0.0118146	0.0118146	1.46836	1.46836	Apple up vs Pear	0.215551	8.20538	0.191316	0.349738	1	0.175922	0.203034	0.703854	0.546342	0.758608	0.644522	0.490042	0.786322	0.806352	0.678261	0.671631	0.486428	0.745407	0.476285	0.58468	0.698076	0.523535
609063	cg18580559	8					0	0.0118972	0.0118972	0.562149	-1.77889	Apple down vs Pear	-0.251263	8.18566	0.259959	0.476369	1	0.427134	0.658308	0.0604379	0.650505	0.397324	0.638063	0.369458	0.412055	0.370466	0.0384658	0.38918	0.644164	0.418341	0.455429	0.0337147	0.622944	0.656911
303156	cg08954948	10	IL2RA	Body			45	0.0121299	0.0121299	1.65394	1.65394	Apple up vs Pear	0.205779	8.13099	0.174363	0.321663	1	0.316701	0.557975	0.221381	0.567162	0.640739	0.184474	0.318455	0.6996	0.630325	0.47921	0.487389	0.195166	0.579957	0.35467	0.544128	0.467586	0.16238
789414	cg25099095	6			S_Shelf		29	0.0123285	0.0123285	3.4867	3.4867	Apple up vs Pear	0.434362	8.08526	0.776879	1.44129	1	0.0372672	0.505026	0.540326	0.0402164	0.912709	0.0460675	0.521862	0.917464	0.886982	0.902086	0.498869	0.0392352	0.035885	0.464838	0.890992	0.0418974	0.0313668
501505	cg15074403	7	EGFR	Body			29	0.0125712	0.0125712	0.281578	-3.55142	Apple down vs Pear	-0.27108	8.03052	0.302584	0.565188	1	0.0481899	0.684111	0.0313474	0.372765	0.0325522	0.046804	0.374987	0.368897	0.0539105	0.0307875	0.0365277	0.427411	0.0499078	0.0458016	0.039973	0.409779	0.65001
486913	cg14615128	7	GRID2IP	Body	N_Shore		0	0.012764	0.012764	0.615891	-1.62366	Apple down vs Pear	-0.306244	7.9879	0.386174	0.725173	1	0.762946	0.830518	0.510334	0.488675	0.410019	0.824606	0.785602	0.0288485	0.0705545	0.797898	0.40983	0.739997	0.845165	0.560453	0.788622	0.797381	0.839935
555715	cg16788050	11			Island		40	0.0127695	0.0127695	1.55275	1.55275	Apple up vs Pear	0.262308	7.98668	0.283316	0.532104	1	0.811846	0.816328	0.770373	0.805253	0.78684	0.23219	0.498696	0.801497	0.830758	0.749941	0.525735	0.233354	0.766917	0.793329	0.537897	0.206311	0.523099
229781	cg06754542	8	PVT1	Body			37	0.0129635	0.0129635	1.82927	1.82927	Apple up vs Pear	0.400566	7.94456	0.66069	1.24744	1	0.898374	0.0490102	0.911757	0.610104	0.910502	0.930186	0.923806	0.927632	0.936574	0.921041	0.903722	0.0360636	0.907186	0.880717	0.926772	0.0289043	0.514897
170902	cg04982228	6	GPLD1	Body			2	0.0130594	0.0130594	9.59661	9.59661	Apple up vs Pear	0.282635	7.92399	0.328929	0.622658	1	0.0316322	0.0339459	0.0290814	0.457991	0.028589	0.0188874	0.0274757	0.48089	0.437479	0.031066	0.431442	0.0383352	0.47538	0.754848	0.0283622	0.0437214	0.0361448
189083	cg05519532	9					13	0.0130881	0.0130881	1.76365	1.76365	Apple up vs Pear	0.314695	7.91788	0.407783	0.772522	1	0.825105	0.0338802	0.717809	0.85317	0.832742	0.439811	0.625484	0.879217	0.403251	0.820288	0.805028	0.0236322	0.502003	0.59638	0.857994	0.485033	0.451708
417224	cg12531767	X	TAZ	Body	S_Shelf		16	0.0130911	0.0130911	0.276111	-3.62174	Apple down vs Pear	-0.372423	7.91723	0.571113	1.08203	1	0.164733	0.775865	0.116841	0.0786657	0.0459122	0.0792911	0.419496	0.142959	0.00674969	0	0.0484403	0.590524	0.0566923	0.806893	0.117367	0.906144	0.665271
245247	cg07199764	1					44	0.0131457	0.0131457	0.629169	-1.5894	Apple down vs Pear	-0.214947	7.90565	0.190244	0.360965	1	0.638093	0.581748	0.317625	0.150501	0.558016	0.423215	0.579206	0.33579	0.548578	0.581231	0.303345	0.546414	0.581406	0.146338	0.124065	0.656064	0.632714
309947	cg09167828	2	C2orf50	3'UTR			47	0.0131808	0.0131808	1.72995	1.72995	Apple up vs Pear	0.35187	7.89822	0.509817	0.968227	1	0.881338	0.0268135	0.84446	0.511654	0.837236	0.818592	0.84774	0.893303	0.899836	0.900909	0.836022	0.39371	0.891393	0.872025	0.852328	0.389697	0.0164335
359073	cg10678429	5					0	0.0133544	0.0133544	1.68903	1.68903	Apple up vs Pear	0.227973	7.86182	0.214001	0.408304	1	0.0758366	0.473819	0.719178	0.455189	0.822671	0.466199	0.377257	0.762777	0.446089	0.483673	0.462283	0.411898	0.484737	0.464524	0.487234	0.0438673	0.467161
88969	cg02564175	16				Promoter_Associated	49	0.0138218	0.0138218	3.11323	3.11323	Apple up vs Pear	0.244505	7.76647	0.246164	0.475435	1	0.0191476	0.0142501	0.460445	0.465868	0.323678	0.410761	0.0106119	0.0877841	0.0929219	0.47523	0.507697	0.0185419	0.457796	0.585682	0.144964	0.296491	0.0401091
418400	cg12569880	18			S_Shore		33	0.013877	0.013877	1.55402	1.55402	Apple up vs Pear	0.252659	7.75545	0.262856	0.508397	1	0.339478	0.170656	0.735102	0.727067	0.718673	0.601498	0.679567	0.745517	0.712699	0.707493	0.637097	0	0.723703	0.636029	0.743666	0.713377	0.687743
456929	cg13764124	8					47	0.013919	0.013919	2.04721	2.04721	Apple up vs Pear	0.328337	7.89299	0.404269	0.717062	1	0.503293	?	0.551546	0.254556	0.840792	0.510894	0.130537	0.884695	0.37273	0.876138	0.543158	0.250563	0.852662	0.446286	0.79615	0.0256647	0.460255
658231	cg20364183	3	LSAMP	Body			0	0.0146925	0.0146925	0.67222	-1.48761	Apple down vs Pear	-0.266092	7.59835	0.29155	0.575553	1	0.800838	0.810278	0.798748	0.411844	0.436668	0.798869	0.824295	0.0627311	0.440993	0.807613	0.768996	0.776915	0.438214	0.440286	0.851004	0.848956	0.822464
709227	cg22237495	1			S_Shelf		46	0.0147178	0.0147178	1.49059	1.49059	Apple up vs Pear	0.281439	7.59364	0.326151	0.644258	1	0.917066	0.0287645	0.905313	0.543806	0.874821	0.556348	0.913339	0.90245	0.891899	0.891906	0.876551	0.526358	0.882997	0.882187	0.899229	0.544594	0.529266
347068	cg10307207	6					35	0.0147488	0.0147488	0.410818	-2.43417	Apple down vs Pear	-0.292397	7.58787	0.352042	0.69593	1	0.551862	0.829692	0.481397	0.493507	0.0714987	0.0148563	0.618682	0.0699242	0.0317461	0.143954	0.43449	0.436403	0.110932	0.0126696	0.188676	0.474531	0.547905
313727	cg09281805	7	FOXK1	Body			0	0.0148946	0.0148946	2.07086	2.07086	Apple up vs Pear	0.269474	7.56096	0.299007	0.593193	1	0.076248	0.055499	0.62114	0.0426878	0.692391	0.409553	0.423624	0.707108	0.405763	0.635394	0.386316	0.379631	0.689658	0.401318	0.629384	0.362568	0.0543743
102562	cg02956194	6			S_Shelf		1	0.0150945	0.0150945	0.550799	-1.81555	Apple down vs Pear	-0.344175	7.52455	0.487763	0.972342	1	0.869146	0.843145	0.501441	0.0522355	0.0487827	0.879618	0.886159	0.474921	0.046631	0.807133	0.479641	0.496133	0.494877	0.445633	0.868892	0.51835	0.870807
644672	cg19866026	14	PPP2R5E	Body		Unclassified_Cell_type_specific	0	0.0151106	0.0151106	1.75574	1.75574	Apple up vs Pear	0.35383	7.52164	0.515511	1.02806	1	0.776796	0.861673	0.822481	0.84132	0.789926	0.767035	0.781959	0.834308	0.826736	0.747692	0.838193	0	0.848759	0.8466	0.824157	0.0898502	0
808818	cg25794455	5					0	0.0152972	0.0152972	1.52241	1.52241	Apple up vs Pear	0.251697	7.48819	0.260858	0.522538	1	0.451572	0.107749	0.753903	0.733003	0.740908	0.755941	0.748229	0.72048	0.760467	0.703344	0.710552	0.459822	0.723809	0.770915	0.717563	0.759302	0.0899704
796063	cg25341939	14				Unclassified_Cell_type_specific	0	0.015509	0.015509	1.39709	1.39709	Apple up vs Pear	0.200573	7.45078	0.165651	0.333491	1	0.695346	0.470017	0.652072	0.757868	0.699547	0.669958	0.689649	0.772343	0.702297	0.665075	0.664983	0.474417	0.726237	0.715577	0.700784	0.0361391	0.500211
318698	cg09433738	3	SPSB4	Body		Unclassified_Cell_type_specific	33	0.0155533	0.0155533	0.306402	-3.26368	Apple down vs Pear	-0.229354	7.44305	0.216602	0.436519	1	0.0880451	0.423738	0.0872959	0.291339	0.0847043	0.0765797	0.0382756	0.073512	0.0902945	0.064122	0.090889	0.56943	0.0967651	0.0719806	0.0622879	0.469903	0.648741
561951	cg16995742	2	COPS8	TSS1500	N_Shore		14	0.0156572	0.0156572	2.33688	2.33688	Apple up vs Pear	0.364125	7.42497	0.545946	1.10293	1	0.0470176	0.0383456	0.873145	0.583708	0.872199	0.581668	0.572388	0.536354	0.88898	0.549028	0.572093	0.0415765	0.550172	0.0528734	0.886394	0.0437905	0.581803
40054	cg01130157	7					0	0.0159122	0.0159122	2.13167	2.13167	Apple up vs Pear	0.233703	7.38119	0.224894	0.457029	1	0.525446	0	0.49296	0.519821	0.538724	0.217215	0.0676281	0.538396	0.229119	0.489693	0.258237	0.118035	0.565789	0.203794	0.565621	0.463593	0.0536665
727231	cg22901480	12	NOS1	5'UTR			0	0.0161198	0.0161198	5.63552	5.63552	Apple up vs Pear	0.253252	7.34614	0.264092	0.539248	1	0.042597	0.074773	0.410281	0.462828	0.48522	0.0481849	0.0969606	0.0242793	0.698043	0.0415868	0.393955	0.0456831	0.464289	0.0487053	0.0496662	0.0154495	0.0587829
636900	cg19597178	2	SLC8A1	Body			20	0.0164665	0.0164665	0.637793	-1.56791	Apple down vs Pear	-0.267823	7.28874	0.295356	0.607834	1	0.661077	0.813293	0.28804	0.297292	0.290444	0.768788	0.670873	0.678286	0.10677	0.57609	0.76196	0.636996	0.237971	0.698823	0.780297	0.806615	0.818301
826516	cg26422465	1	WDR8	Body	Island		0	0.0166484	0.0166484	0.5342	-1.87196	Apple down vs Pear	-0.275028	7.25918	0.311461	0.643588	1	0.365535	0.71042	0.0637422	0.0452894	0.0472606	0.601203	0.65132	0.620724	0.398604	0.407644	0.0445509	0.454326	0.669586	0.411374	0.445378	0.666421	0.683882
28725	cg00807008	2	CLASP1	Body			19	0.0169155	0.0169155	1.44804	1.44804	Apple up vs Pear	0.260674	7.21643	0.279799	0.581586	1	0.541279	0.579401	0.835355	0.886334	0.8887	0.869352	0.927874	0.890684	0.574112	0.850702	0.882621	0.543014	0.854179	0.906707	0.855435	0.0421063	0.569633
381053	cg11379315	4	MEPE	5'UTR			1	0.0170224	0.0170224	0.643791	-1.5533	Apple down vs Pear	-0.291822	7.19956	0.35066	0.730585	1	0.839414	0.843556	0.865695	0.862516	0.4578	0.879276	0.591348	0.0755501	0.605261	0.580788	0.63146	0.889837	0.0744	0.607131	0.513619	0.860038	0.831241
304184	cg08986950	5	ERAP1	Body			8	0.0172188	0.0172188	0.275974	-3.62353	Apple down vs Pear	-0.369942	7.16885	0.563529	1.17912	1	0.551869	0.931506	0.0341691	0.0344952	0.0381885	0.0397939	0.592653	0.0430253	0.0418531	0.0458361	0.0394615	0.907386	0.525857	0.0478094	0.559399	0.0519437	0.501509
591512	cg17965552	X			N_Shore		1	0.017534	0.017534	1.99538	1.99538	Apple up vs Pear	0.337612	7.12039	0.469337	0.988716	1	0	0.681093	0.193239	0.730027	0.746011	0.727401	0.0681287	0.759874	0.72125	0.687226	0.709316	0.172736	0.782077	0.705381	0.733515	0.70682	0.018078
491432	cg14756466	8	TRPS1	Body	S_Shore		0	0.0176201	0.0176201	1.55699	1.55699	Apple up vs Pear	0.29899	7.10733	0.368098	0.776869	1	0.82894	0.523384	0.814973	0.813836	0.808487	0.77261	0.768433	0.83404	0.870956	0.838789	0.851048	0.0333745	0.870988	0.85493	0.799805	0.0325709	0.798251
131242	cg03801613	1	GSTM1	TSS1500	N_Shore		40	0.0176285	0.0176285	1.7208	1.7208	Apple up vs Pear	0.207425	7.10606	0.177163	0.373968	1	0.244783	0.395804	0.770149	0.299983	0.280407	0.192358	0.245336	0.39922	0.311008	0.357987	0.575768	0.3735	0.582506	0.571232	0.803693	0.230111	0.332497
215603	cg06330797	6	RPS6KA2	Body	N_Shore		40	0.0179775	0.0179775	1.68945	1.68945	Apple up vs Pear	0.317221	7.0539	0.414356	0.881121	1	0.469025	0.479866	0.824116	0.497421	0.842088	0.857463	0.020835	0.871636	0.493711	0.845322	0.821291	0.851295	0.861576	0.855375	0.860746	0.0424606	0.499805
133735	cg03878285	17	PITPNC1	Body		Unclassified	1	0.0180392	0.0180392	1.63725	1.63725	Apple up vs Pear	0.215982	7.0448	0.192081	0.408985	1	0.437189	0.454923	0.400255	0.719298	0.738468	0.36457	0.267034	0.746612	0.613862	0.430341	0.396214	0.376985	0.401307	0.339057	0.76367	0.0383584	0.433423
751910	cg23778370	7	RAMP3	Body	S_Shore		1	0.0180661	0.0180661	1.42716	1.42716	Apple up vs Pear	0.20315	7.04083	0.169935	0.362034	1	0.697342	0.132367	0.625981	0.745078	0.744158	0.630794	0.490699	0.739941	0.638329	0.677319	0.643145	0.526142	0.719536	0.544036	0.709845	0.675236	0.176527
642552	cg19793163	10					0	0.0183151	0.0183151	1.50884	1.50884	Apple up vs Pear	0.246641	7.00453	0.250484	0.536403	1	0.509959	0.479671	0.837907	0.875886	0.605447	0.547657	0.0235169	0.862566	0.83691	0.552168	0.834838	0.794411	0.563316	0.851927	0.492531	0.489313	0.548432
504821	cg15178138	4	SORCS2	Body			27	0.0185315	0.0185315	1.48363	1.48363	Apple up vs Pear	0.284207	6.97343	0.332596	0.715422	1	0.883818	0.157547	0.85795	0.863946	0.874627	0.824078	0.322185	0.900577	0.892359	0.845847	0.887565	0.828094	0.8862	0.844498	0.865039	0.903967	0.193891
817390	cg26111679	8	PTK2B	5'UTR			27	0.0185556	0.0185556	2.56054	2.56054	Apple up vs Pear	0.239082	6.96999	0.235365	0.506524	1	0.071228	0.385321	0.0627384	0.367725	0.384349	0.385397	0.0466656	0.372353	0.06519	0.362848	0.566173	0.0697337	0.557985	0.605738	0.577766	0.0602431	0.0538445
585403	cg17749961	2	LCLAT1	TSS1500	N_Shore	Promoter_Associated	17	0.0186025	0.0186025	6.13897	6.13897	Apple up vs Pear	0.213513	6.96332	0.187715	0.404366	1	0.0532439	0.0515028	0.0456678	0.0383766	0.0649512	0.034156	0.0298075	0.337517	0.408465	0.0202109	0.305503	0.0206101	0.346677	0.307191	0.676054	0.0533111	0.0482042
157372	cg04579183	15	NCRNA00052	TSS1500			33	0.018792	0.018792	1.44899	1.44899	Apple up vs Pear	0.205043	6.93655	0.173117	0.374358	1	0.441545	0.0597539	0.659686	0.711839	0.676568	0.629644	0.646761	0.682574	0.679319	0.68481	0.632401	0.356577	0.73705	0.435147	0.717827	0.710626	0.351847
99720	cg02877261	4			N_Shelf		46	0.0190767	0.0190767	0.489592	-2.04252	Apple down vs Pear	-0.211201	6.89691	0.183671	0.399464	1	0.32902	0.337097	0.317172	0.0366843	0.0282201	0.317049	0.288095	0.0388339	0.354542	0.0313915	0.0499269	0.517086	0.315452	0.535393	0.318255	0.57345	0.534718
640545	cg19726630	3	CMTM8	Body			0	0.0190904	0.0190904	0.136866	-7.30642	Apple down vs Pear	-0.207008	6.89503	0.176451	0.383867	1	0.0364482	0.0452812	0.0198463	0.0399184	0.029983	0.495876	0.529088	0.0357509	0.0383966	0.0393415	0.0291299	0.036851	0.0340944	0.0433786	0.0184108	0.0309673	0.504323
704858	cg22071943	5	SLC6A18	TSS200	N_Shore		42	0.0191262	0.0191262	0.471013	-2.12308	Apple down vs Pear	-0.293938	6.89009	0.355763	0.77451	1	0.669093	0	0.0609947	0.101661	0.206455	0.679725	0.636537	0.676137	0.634171	0.190609	0.181404	0.585357	0.204102	0.179953	0.181758	0.635094	0.68383
846049	cg27088421	8	PPP3CC	3'UTR			1	0.0194282	0.0194282	1.48134	1.48134	Apple up vs Pear	0.251675	6.8489	0.260813	0.571216	1	0	0.808083	0.756279	0.754777	0.722861	0.776826	0.675955	0.783362	0.779475	0.80843	0.810467	0.740031	0.761906	0.774227	0.793639	0.339855	0.319319
210327	cg06164346	16	GFOD2	Body			1	0.0196765	0.0196765	2.1005	2.1005	Apple up vs Pear	0.209342	6.81559	0.180453	0.397147	1	0.595442	0.022133	0.310789	0.341124	0.337156	0.337767	0.0259371	0.544745	0.334846	0.59787	0.461304	0.0222091	0.389154	0.333512	0.345167	0.296908	0.0311734
613109	cg18727946	8					6	0.0201388	0.0201388	1.8385	1.8385	Apple up vs Pear	0.369107	6.75484	0.560988	1.24575	1	0.757918	0.816491	0.847367	0.903835	0.800805	0.912471	0.284164	0.878958	0.938417	0.827546	0.913274	0.276079	0.89108	0.847326	0.244442	0	0.0342639
855536	cg27415324	22			S_Shelf		18	0.0206861	0.0206861	1.65352	1.65352	Apple up vs Pear	0.284911	6.68496	0.334247	0.749998	1	0.739611	0.0744063	0.713249	0.554023	0.771566	0.771791	0.650577	0.799698	0.722772	0.723303	0.720073	0.678492	0.754591	0.700552	0.748902	0.0789711	0.0578839
4585	cg00123214	1	RWDD3	Body	S_Shelf		0	0.0210707	0.0210707	1.52649	1.52649	Apple up vs Pear	0.241312	6.63712	0.239777	0.541901	1	0.817264	0.46264	0.825791	0.787762	0.793622	0.465461	0.474787	0.808715	0.798666	0.463281	0.774936	0.0388289	0.80888	0.484738	0.450119	0.481112	0.468277
415601	cg12479705	4					44	0.0210961	0.0210961	0.546728	-1.82906	Apple down vs Pear	-0.316282	6.63399	0.411907	0.931355	1	0.415263	0.772991	0.768514	0.695557	0.179424	0.771695	0.642965	0.117578	0.295549	0.101203	0.683957	0.673721	0	0.252587	0.720565	0.82453	0.783265
753054	cg23821943	4	SORCS2	Body		Unclassified	0	0.0211591	0.0211591	1.44513	1.44513	Apple up vs Pear	0.280102	6.73696	0.294215	0.611405	1	0.916406	0.498517	0.904656	0.926888	0.912726	0.918003	?	0.916474	0.905463	0.891383	0.908262	0.89056	0.903701	0.91049	0.91357	0.0416316	0.510436
157822	cg04592386	19	SLC7A9	Body			1	0.021181	0.021181	1.59135	1.59135	Apple up vs Pear	0.262317	6.62357	0.283335	0.641652	1	0.0699334	0.784653	0.675976	0.768683	0.727565	0.705643	0.693343	0.69321	0.688736	0.682258	0.694752	0.60566	0.759274	0.611667	0.756947	0.154516	0.0913828
415317	cg12471283	5					4	0.0212074	0.0212074	1.46748	1.46748	Apple up vs Pear	0.242965	6.62035	0.243074	0.550742	1	0.579469	0.570161	0.823799	0.551457	0.887398	0.535034	0.54788	0.877036	0.811176	0.828369	0.536731	0.500451	0.866278	0.569969	0.874788	0.864321	0.0408272
276090	cg08133365	1	LUZP1	5'UTR			1	0.0212221	0.0212221	1.54265	1.54265	Apple up vs Pear	0.300987	6.61856	0.373031	0.845421	1	0.491116	0.527129	0.948771	0.940351	0.932906	0.481683	0.961792	0.916318	0.532544	0.918758	0.938307	0.0173661	0.538749	0.944927	0.944867	0.501143	0.90241
380616	cg11366142	8	AZIN1-AS1	Body			37	0.0213492	0.0213492	3.93202	3.93202	Apple up vs Pear	0.285364	6.6031	0.33531	0.761711	1	0.0360827	0.0412109	0.463426	0.0397773	0.0408745	0.0416749	0.0328755	0.840774	0.470628	0.457413	0.461956	0.453632	0.0459071	0.483904	0.522244	0.0407707	0.0350401
756553	cg23943944	5					40	0.0216029	0.0216029	1.81525	1.81525	Apple up vs Pear	0.270773	6.57256	0.301897	0.688995	1	0.465653	0.0388668	0.665335	0.451578	0.753696	0.70766	0.557919	0.703988	0.400557	0.726018	0.433268	0.0443593	0.462474	0.611658	0.820486	0.463505	0.046968
222571	cg06545341	20	CDH4	Body			48	0.0217672	0.0217672	1.82109	1.82109	Apple up vs Pear	0.249308	6.55299	0.255929	0.585831	1	0.0901509	0.14466	0.570318	0.619123	0.604434	0.56683	0.577726	0.628846	0.564029	0.564847	0.525938	0.606588	0.620011	0.180192	0.651637	0.0372594	0.102195
186969	cg05455372	7	LOC168474	TSS200			39	0.0225363	0.0225363	0.571159	-1.75083	Apple down vs Pear	-0.334283	6.46364	0.460127	1.0678	1	0.857713	0.779768	0.0554712	0.44066	0.0272311	0.872264	0.84432	0.825587	0.0308347	0.465891	0.836186	0.795306	0.507838	0.412604	0.849898	0.492561	0.814589
21405	cg00597225	2					37	0.0227484	0.0227484	1.57594	1.57594	Apple up vs Pear	0.26397	6.4396	0.286918	0.668328	1	0.103373	0.56233	0.919349	0.571817	0.905492	0.608136	0.664347	0.590365	0.59685	0.947246	0.55456	0.605053	0.593523	0.950268	0.593527	0.0861553	0.578916
118684	cg03433448	6	DCDC2	Body			1	0.0229174	0.0229174	1.59725	1.59725	Apple up vs Pear	0.318375	6.42065	0.417375	0.975076	1	0.908241	0.227666	0.798098	0.834299	0.870345	0.906766	0.697576	0.867036	0.838847	0.809829	0.853069	0.0673479	0.916919	0.843782	0.882243	0.872076	0.0518315
365962	cg10900271	7					1	0.0230497	0.0230497	0.614758	-1.62666	Apple down vs Pear	-0.311649	6.40592	0.399928	0.936464	1	0.767698	0.820755	0.749511	0.0975788	0.166734	0.826451	0.802964	0.814627	0.359362	0.789912	0.16931	0.768522	0.202536	0.813742	0.809897	0.820688	0.855716
722901	cg22749642	11	TSPAN4	5'UTR	N_Shore		43	0.0231441	0.0231441	1.75312	1.75312	Apple up vs Pear	0.215106	6.39548	0.190525	0.446859	1	0.310616	0.49866	0.26063	0.313886	0.403533	0.088054	0.45918	0.740751	0.643992	0.558317	0.327433	0.304818	0.470936	0.553403	0.73438	0.296257	0.0417594
342489	cg10167378	1			Island		26	0.0233776	0.0233776	0.700467	-1.42762	Apple down vs Pear	-0.204454	6.36984	0.172124	0.405326	1	0.530673	0.822993	0.411767	0.53212	0.502805	0.334192	0.677463	0.318204	0.506076	0.563413	0.605442	0.866695	0.638642	0.5431	0.159665	0.743793	0.802233
285296	cg08415053	5					0	0.0234245	0.0234245	0.306134	-3.26654	Apple down vs Pear	-0.392097	6.36473	0.633049	1.49193	1	0	0.776933	0.753978	0.102893	0.0420653	0.0388449	0.503835	0.0550188	0.494389	0.125658	0.0241674	0.861075	0.0320498	0.0592772	0.0404395	0.887721	0.887228
516784	cg15579027	5	SLC25A48	Body	N_Shore		42	0.0235879	0.0235879	1.82791	1.82791	Apple up vs Pear	0.336543	6.347	0.46637	1.10218	1	0.183749	0.957663	0.539606	0.96428	0.971311	0.545013	0.182569	0.309489	0.599622	0.563203	0.968449	0.556794	0.981195	0.557596	0.975644	0.219278	0.200408
865849	rs2804694							0.023591	0.023591	2.95823	2.95823	Apple up vs Pear	0.40865	6.34666	0.687627	1.62517	1	0.0168514	0.0153909	0.469148	0.935366	0.950031	0.47706	0.450561	0.941569	0.47609	0.468603	0.929651	0.455406	0.0256969	0.951595	0.0255887	0.0248895	0.0206254
695037	cg21708364	14	DPF3	Body		Unclassified_Cell_type_specific	1	0.0240333	0.0240333	1.4003	1.4003	Apple up vs Pear	0.227039	6.40065	0.1933	0.422801	1	0.78631	0.0505918	0.800706	0.803245	0.796926	?	0.782645	0.785837	0.770636	0.803396	0.780169	0.515851	0.78712	0.80571	0.80831	0.477975	0.789627
218375	cg06417478	19	HOOK2	Body	N_Shore	Unclassified_Cell_type_specific		0.0245516	0.0245516	2.54023	2.54023	Apple up vs Pear	0.211492	6.24527	0.184178	0.442361	1	0.398444	0.0525146	0.419165	0.411604	0.403286	0.0391745	0.0237985	0.413918	0.570822	0.400044	0.393423	0.379127	0.398078	0.0343742	0.0433221	0.029348	0.0387743
810799	cg25872828	18	LOC101060542	TSS1500			0	0.0246505	0.0246505	0.446602	-2.23913	Apple down vs Pear	-0.343158	6.23509	0.484883	1.1665	1	0.533213	0.903785	0.053723	0.521456	0.0436567	0.512704	0.531194	0.500719	0.0361134	0.516181	0.039267	0.906039	0.516141	0.0391183	0.502969	0.0378002	0.91591
686992	cg21415084	12					1	0.0246774	0.0246774	2.06575	2.06575	Apple up vs Pear	0.294678	6.23233	0.357556	0.860567	1	0.140219	0.176358	0.668384	0.731552	0.716257	0.758849	0.181802	0.790501	0.1723	0.67277	0.180281	0.321823	0.766869	0.288098	0.724741	0.192512	0.163919
26085	cg00730761	6	ASCC3	Body		Unclassified_Cell_type_specific	1	0.024877	0.024877	2.12013	2.12013	Apple up vs Pear	0.224286	6.21196	0.207135	0.500168	1	0.423301	0.395349	0.412565	0.387556	0.659322	0.0523198	0.0285172	0.0430607	0.426794	0.400903	0.408827	0.414217	0.415927	0.675884	0.414345	0.0471939	0.0407296
744506	cg23517115	5	LOC255167	TSS1500	N_Shore		3	0.0249374	0.0249374	1.51338	1.51338	Apple up vs Pear	0.240295	6.20583	0.237759	0.574683	1	0.717479	0.704326	0.673136	0.709718	0.739907	0.0991678	0.714093	0.710059	0.761104	0.689902	0.684635	0.100302	0.709867	0.7386	0.666681	0.711588	0.22951
128318	cg03714923	16					1	0.0250527	0.0250527	1.461	1.461	Apple up vs Pear	0.264312	6.19418	0.287662	0.696611	1	0.830087	0.84953	0.820295	0.850649	0.841271	0.210759	0.882326	0.85647	0.855146	0.819346	0.818161	0.178419	0.86319	0.848824	0.803217	0.817616	0.244677
27181	cg00762003	21	AGPAT3	Body	Island		1	0.0253169	0.0253169	1.45314	1.45314	Apple up vs Pear	0.229741	6.16773	0.217334	0.528559	1	0.725891	0.204883	0.735173	0.742281	0.757853	0.74263	0.748118	0.759446	0.757445	0.720282	0.70791	0.75985	0.722849	0.732196	0.731981	0.176103	0.191526
141449	cg04109990	9	LURAP1L	Body			0	0.0253254	0.0253254	1.88387	1.88387	Apple up vs Pear	0.279142	6.16687	0.320848	0.780415	1	0.444993	0.0396355	0.720594	0.373517	0.727296	0.800291	0.446118	0.414188	0.768042	0.686029	0.717191	0.417699	0.404237	0.400111	0.738379	0.0332754	0.0287022
354295	cg10528826	7	PTPRN2	Body	S_Shelf		1	0.0253736	0.0253736	1.54532	1.54532	Apple up vs Pear	0.297468	6.16209	0.364359	0.886937	1	0.801533	0.860086	0.844732	0.798299	0.878953	0.862984	0.873634	0.86831	0.840589	0.806933	0.845098	0.158092	0.865115	0.7874	0.894151	0.0643856	0.197717
294314	cg08691316	3					1	0.0253853	0.0253853	1.45808	1.45808	Apple up vs Pear	0.207653	6.16092	0.177551	0.432284	1	0.70058	0.647374	0.624913	0.633917	0.662873	0.217146	0.675305	0.707502	0.660273	0.663626	0.645672	0.629093	0.72211	0.585972	0.702745	0.161668	0.141989
18004	cg00504897	9	IARS	Body			27	0.0255452	0.0255452	1.38539	1.38539	Apple up vs Pear	0.219401	6.14512	0.19821	0.483823	1	0.8011	0.247861	0.769216	0.766367	0.783809	0.791853	0.811031	0.779757	0.820062	0.767529	0.752043	0.23658	0.835193	0.791891	0.821087	0.772197	0.324441
714978	cg22460601	8	USP17L1	TSS1500			49	0.0256728	0.0256728	1.59627	1.59627	Apple up vs Pear	0.242519	6.13257	0.242181	0.592364	1	0.638955	0.599545	0.657729	0.628692	0.504975	0.686884	0.672219	0.600371	0.677722	0.676585	0.69283	0.0673776	0.668618	0.635548	0.749364	0.0850456	0.0970444
119222	cg03448017	16					0	0.025684	0.025684	1.74081	1.74081	Apple up vs Pear	0.270896	6.13148	0.302172	0.739231	1	0.692452	0.37077	0.668412	0.400478	0.5987	0.619607	0.729995	0.780709	0.708672	0.71758	0.616598	0.0446361	0.713543	0.456864	0.704154	0.0376852	0.06458
356654	cg10601372	19	WDR18	Body	S_Shore		0	0.0257258	0.0257258	0.691357	-1.44643	Apple down vs Pear	-0.283264	6.12739	0.330393	0.808809	1	0.949115	0.942542	0.940678	0.948873	0.384284	0.947316	0.964062	0.965618	0.534581	0.952688	0.331957	0.713505	0.220657	0.519613	0.546123	0.954192	0.953665
507827	cg15281606	2	UBE2F	Body			0	0.0257441	0.0257441	8.85458	8.85458	Apple up vs Pear	0.218069	6.12561	0.195811	0.47949	1	0.0112463	0.0271985	0.0264772	0.443314	0.0495828	0.0305947	0.0203747	0.481259	0.472166	0.447147	0.0368656	0.0273339	0.476859	0.0145856	0.0100682	0.0393299	0.0382652
121837	cg03525852	8					44	0.0261735	0.0261735	1.48536	1.48536	Apple up vs Pear	0.217998	6.08408	0.195684	0.482449	1	0.699481	0.662834	0.690168	0.672377	0.672742	0.0581598	0.641003	0.67124	0.601073	0.665004	0.651804	0.540891	0.69336	0.667776	0.685941	0.501262	0.040423
377949	cg11282840	8					50	0.0261932	0.0261932	1.55659	1.55659	Apple up vs Pear	0.284277	6.08219	0.33276	0.820659	1	0.874293	0.507105	0.8871	0.458769	0.89652	0.862763	0.440319	0.873613	0.854948	0.873882	0.889125	0.022108	0.883065	0.902196	0.431047	0.41491	0.45375
817883	cg26128147	9	IARS	Body			40	0.0262451	0.0262451	1.54183	1.54183	Apple up vs Pear	0.306331	6.07722	0.386394	0.953711	1	0.893995	0	0.847238	0.885392	0.869163	0.88304	0.832009	0.89264	0.892305	0.861916	0.899189	0.261666	0.858845	0.853851	0.856448	0.902348	0.184516
697233	cg21792760	2	ARPC2	Body			2	0.0263168	0.0263168	0.244882	-4.0836	Apple down vs Pear	-0.303941	6.07039	0.380389	0.939945	1	0.461582	0	0.299181	0.207729	0.145806	0.00830552	0.0525164	0	0.112338	0.174123	0	0.780792	0	0.0464928	0	0.755892	0.75847
189912	cg05546557	5	PLEKHG4B	Body	N_Shore		0	0.0264394	0.0264394	1.57683	1.57683	Apple up vs Pear	0.203398	6.05875	0.170351	0.421747	1	0.540949	0.311964	0.550991	0.605916	0.543527	0.572271	0.639344	0.653723	0.58233	0.541246	0.507576	0.0404028	0.374717	0.603297	0.596796	0.333351	0.0300128
321908	cg09531751	10	ADAM12	Body			0	0.0264691	0.0264691	1.53088	1.53088	Apple up vs Pear	0.265593	6.05595	0.290458	0.719437	1	0.806448	0.557977	0.70414	0.749	0.714794	0.621854	0.609216	0.788991	0.926359	0.919058	0.20088	0.139417	0.771941	0.956074	0.927555	0.393884	0.373205
318041	cg09413645	4	2019-09-11	Body			1	0.0268865	0.0268865	0.698909	-1.4308	Apple down vs Pear	-0.207161	6.01684	0.176711	0.440541	1	0.769838	0.669617	0.335038	0.60659	0.290448	0.639836	0.828016	0.451748	0.670346	0.689871	0.659944	0.647518	0.604915	0.467122	0.0327091	0.607018	0.654392
12981	cg00366190	19	WDR88	TSS200	Island		46	0.0268882	0.0268882	0.548714	-1.82244	Apple down vs Pear	-0.36705	6.01667	0.554754	1.38304	1	0.908712	0.923012	0.346562	0.921116	0.200468	0.180871	0.916082	0.890945	0.890483	0.200111	0.158547	0.912279	0.236412	0.31332	0.304961	0.918851	0.933593
831315	cg26584456	10	PPIF	3'UTR		Gene_Associated_Cell_type_specific	47	0.0275897	0.0275897	2.13206	2.13206	Apple up vs Pear	0.304273	5.95251	0.38122	0.960653	1	0.0354038	0.0840245	0.619662	0.56601	0.917521	0.545953	0.509652	0.888635	0.582057	0.541569	0.0203489	0.0463513	0.535342	0.574759	0.484596	0.0617401	0.598316
99575	cg02873093	8	ADCY8	Body			46	0.0276057	0.0276057	1.59687	1.59687	Apple up vs Pear	0.269199	5.95106	0.298399	0.752131	1	0.0992286	0.715647	0.738099	0.740379	0.736462	0.742165	0.703269	0.707667	0.652244	0.731597	0.667762	0	0.768594	0.690597	0.768787	0.758488	0.138339
392270	cg11738485	19	HOOK2	Body	Island	Unclassified_Cell_type_specific	0	0.027726	0.027726	2.75607	2.75607	Apple up vs Pear	0.338781	5.94026	0.472593	1.19336	1	0.600432	0.0269978	0.618477	0.641303	0.666062	0.0189826	0.0129384	0.60321	0.910749	0.575562	0.617481	0.627294	0.614588	0.0252183	0.0443552	0.0293706	0.0344224
312863	cg09255886	1	LUZP1	5'UTR			32	0.0277598	0.0277598	1.52403	1.52403	Apple up vs Pear	0.265519	5.93723	0.290296	0.733412	1	0.440035	0.43043	0.846406	0.858574	0.86099	0.464352	0.853397	0.850776	0.447287	0.830003	0.852467	0.0537715	0.441851	0.854016	0.879683	0.447716	0.857101
165015	cg04810745	2				Unclassified_Cell_type_specific	1	0.0279244	0.0279244	0.362219	-2.76076	Apple down vs Pear	-0.214809	5.92255	0.190001	0.481213	1	0.306607	0.418558	0.0675772	0.121223	0.212824	0.0149206	0.0320466	0.209669	0.0236513	0.190244	0.0348534	0.350506	0.142554	0.0254793	0.191904	0.796265	0.438747
748506	cg23657581	18					0	0.0280429	0.0280429	2.27354	2.27354	Apple up vs Pear	0.231455	5.91205	0.220588	0.559674	1	0.0518731	0.418009	0.408786	0.423308	0.428188	0.620204	0.0387637	0.437116	0.433251	0.432208	0.0380336	0.0666943	0.412749	0.427267	0.691057	0.0448717	0.031773
180854	cg05273049	10	ARHGAP22	Body			46	0.0281739	0.0281739	0.263147	-3.80016	Apple down vs Pear	-0.307775	5.90049	0.390045	0.991557	1	0.0686117	0.0377229	0.0859452	0.0578149	0.0675961	0.047814	0.61168	0.034015	0.0428634	0.0509103	0.0539702	0.825658	0.0677555	0.580285	0.0579768	0.584621	0.747707
373056	cg11128983	5	CPLX2	TSS1500	N_Shore		40	0.0281915	0.0281915	0.600226	-1.66604	Apple down vs Pear	-0.311044	5.89895	0.398375	1.013	1	0.795231	0.764454	0.194115	0.794964	0.14959	0.76279	0.818515	0.0890202	0.76494	0.10742	0.74454	0.704622	0.222649	0.810133	0.79269	0.800594	0.800142
475003	cg14278666	7	DGKI	Body			15	0.0282462	0.0282462	1.69118	1.69118	Apple up vs Pear	0.307966	5.89415	0.390531	0.993862	1	0.733911	0	0.721494	0.747441	0.742726	0.75138	0.796027	0.787365	0.808621	0.745922	0.715383	0	0.751719	0.74974	0.764938	0.798874	0.0387883
171468	cg04998327	11					0	0.0283672	0.0283672	0.610788	-1.63723	Apple down vs Pear	-0.317483	5.88356	0.415039	1.05813	1	0.885183	0.856755	0.463049	0.469766	0.867929	0.879599	0.870846	0.0279474	0.475675	0.0106203	0.870745	0.446197	0.469562	0.434355	0.89258	0.905978	0.86538
79170	cg02280486	4	LOC101928314	Body			9	0.0284664	0.0284664	0.586788	-1.70419	Apple down vs Pear	-0.216196	5.87492	0.192462	0.491399	1	0.191285	0.475709	0.19186	0.184358	0.465768	0.462496	0.477292	0.184564	0.189784	0.179131	0.497263	0.818111	0.487621	0.511762	0.178019	0.763638	0.473934
865863	rs6626309							0.0288185	0.0288185	2.44441	2.44441	Apple up vs Pear	0.308679	5.84453	0.39234	1.00694	1	0.0185877	0.0109518	0.0166404	0.460657	0.465375	0.49521	0.019287	0.943143	0.45529	0.505376	0.942767	0.469984	0.47001	0.48881	0.475771	0	0.481917
570061	cg17251507	2	LOC100506457	Body			0	0.02932	0.02932	0.530781	-1.88401	Apple down vs Pear	-0.290865	5.80199	0.348363	0.900629	1	0.446016	0.817506	0.0245336	0.464275	0.0343419	0.824277	0.488736	0.471764	0.465574	0.49528	0.457672	0.441586	0.0404998	0.0407994	0.795531	0.850644	0.470478
409435	cg12279734	4	MORF4	TSS1500			0	0.0295129	0.0295129	0.715769	-1.3971	Apple down vs Pear	-0.204491	5.78585	0.172187	0.446399	1	0.797615	0.74785	0.66406	0.500632	0.774015	0.736824	0.66451	0.501721	0.427434	0.146207	0.724037	0.612329	0.752645	0.432589	0.22629	0.750289	0.726765
369353	cg11008123	11	LOC283267	TSS1500			48	0.0295976	0.0295976	0.545111	-1.83449	Apple down vs Pear	-0.319249	5.7788	0.41967	1.08933	1	0.87911	0.860494	0.297559	0.84494	0.292461	0.873632	0.284371	0.331139	0.886354	0.266733	0.313585	0.864314	0.295497	0.288372	0.00904619	0.810823	0.339979
725666	cg22849321	6					24	0.0296392	0.0296392	0.127817	-7.82369	Apple down vs Pear	-0.240424	5.77535	0.238016	0.618187	1	0.0544014	0.525532	0.0140453	0.05329	0.0466575	0.0289012	0.0473323	0.0226965	0.0188593	0.0557583	0.020311	0.00902102	0.0294097	0.0339915	0.0573189	0.813761	0.450659
149716	cg04350215	1	ABCA4	Body			2	0.029833	0.029833	0.629518	-1.58852	Apple down vs Pear	-0.26928	5.75934	0.298578	0.777637	1	0.761557	0.829203	0.759047	0.0479196	0.421525	0.784921	0.76386	0.435752	0.0374027	0.768731	0.429416	0.415969	0.450534	0.810286	0.414967	0.783046	0.749312
131310	cg03803585	11	SHANK2	Body			19	0.0299342	0.0299342	0.686244	-1.45721	Apple down vs Pear	-0.221178	5.75102	0.201434	0.525387	1	0.743651	0.759104	0.405902	0.414763	0.43811	0.763815	0.431225	0.0253473	0.715822	0.4567	0.410357	0.696945	0.455269	0.766168	0.749153	0.774473	0.765347
86828	cg02502145	2	SOS1	Body			35	0.0299632	0.0299632	0.248314	-4.02715	Apple down vs Pear	-0.335654	5.74864	0.46391	1.21049	1	0.0648197	0.924886	0.0532643	0.593905	0.0590443	0.0630143	0.0405356	0.0601057	0.0561534	0.0658247	0.0483412	0.543534	0.0617406	0.0538673	0.0565665	0.941503	0.547457
469304	cg14117320	11	PLEKHA7	Body	N_Shelf		2	0.0300047	0.0300047	0.467511	-2.13899	Apple down vs Pear	-0.336421	5.74525	0.466032	1.21674	1	0.759941	0.712753	0.737931	0.120024	0.117864	0.0923727	0.715051	0	0.169592	0.209891	0.718902	0.682657	0.759321	0.0688203	0.0513455	0.734439	0.725319
424474	cg12765935	12	METAP2	Body			0	0.0303091	0.0303091	1.37152	1.37152	Apple up vs Pear	0.222777	5.7205	0.204357	0.535854	1	0.816508	0.454199	0.841272	0.784165	0.815018	0.814784	0.805425	0.838943	0.834815	0.811481	0.816392	0.811352	0.789009	0.844299	0.848807	0.0455957	0.449638
302795	cg08943467	5	LPCAT1	Body			1	0.0308087	0.0308087	1.54642	1.54642	Apple up vs Pear	0.263825	5.6805	0.286604	0.756809	1	0.712878	0.108055	0.786188	0.861242	0.792851	0.741562	0.482222	0.83912	0.828835	0.798577	0.781733	0.580214	0.812658	0.159095	0.806222	0.571845	0.183011
505918	cg15216357	2	FAM228B	Body			1	0.0310278	0.0310278	0.274033	-3.6492	Apple down vs Pear	-0.287928	5.6632	0.341364	0.904164	1	0.110923	0.658936	0	0	0.671732	0.139602	0	0.111889	0.0950933	0	0.0857878	0.560396	0.0269696	0	0.0953798	0.655731	0.650707
865845	rs2385226							0.0310993	0.0310993	3.5179	3.5179	Apple up vs Pear	0.315056	5.65759	0.408718	1.08364	1	0.387187	0.0243013	0.408198	0.435525	0.967994	0.0294538	0.367371	0.379649	0.0197846	0.397137	0.416887	0.0126632	0.956104	0.398494	0.0220458	0.0221333	0.0327739
49067	cg01394772	20					0	0.0311293	0.0311293	1.3966	1.3966	Apple up vs Pear	0.206819	5.65524	0.176129	0.467165	1	0.445859	0.0449956	0.714045	0.763426	0.764794	0.768838	0.757938	0.779613	0.745419	0.777155	0.47909	0.713049	0.775635	0.732216	0.751567	0.456205	0.463455
602254	cg18339359	8	SLC25A37	Body			31	0.0315675	0.0315675	0.572967	-1.7453	Apple down vs Pear	-0.359912	5.62118	0.533386	1.42333	1	0.853827	0.977677	0.143687	0.864713	0.170618	0.817212	0.318407	0.163104	0.2106	0.827963	0.175727	0.978697	0.842296	0.503523	0.926841	0.980642	0.973272
445354	cg13435526	8	CCAR2	Body			1	0.0316811	0.0316811	1.47497	1.47497	Apple up vs Pear	0.223244	5.61244	0.205215	0.548464	1	0.732259	0.153441	0.731629	0.678866	0.694323	0.709705	0.684919	0.703737	0.699322	0.680536	0.682051	0.718953	0.679267	0.711577	0.671327	0.141604	0.149255
484539	cg14548901	2	ROCK2	Body			24	0.0322462	0.0322462	0.485414	-2.0601	Apple down vs Pear	-0.3558	5.5695	0.521269	1.4039	1	0.558752	0.867714	0.527902	0.562311	0.587589	0.64415	0.142688	0.056455	0.0318665	0.0363116	0.051326	0.882292	0.596892	0.878014	0.0276297	0.859724	0.884691
687696	cg21442528	12	LOC100292680	TSS1500			0	0.0323345	0.0323345	1.38079	1.38079	Apple up vs Pear	0.250468	5.56287	0.258318	0.696542	1	0.918397	0.468641	0.893512	0.900978	0.902632	0.901341	0.886897	0.900486	0.926469	0.925069	0.911605	0.484866	0.909011	0.904874	0.907684	0.0355365	0.908667
16194	cg00456343	10			Island		1	0.0324339	0.0324339	0.635789	-1.57285	Apple down vs Pear	-0.233785	5.55543	0.225052	0.607653	1	0.545998	0.677909	0.178897	0.650044	0.0419249	0.667464	0.678727	0.605338	0.522728	0.102348	0.629557	0.536645	0.644078	0.549549	0.156626	0.684945	0.701567
309587	cg09157251	11	SHANK2	Body			11	0.0324907	0.0324907	0.461659	-2.1661	Apple down vs Pear	-0.31923	5.55119	0.419621	1.13387	1	0.784236	0.726957	0.148225	0.786248	0.154155	0.218804	0.820051	0.0361228	0.776965	0.249264	0.138798	0.161201	0.153591	0.132729	0.16149	0.742272	0.697403
652614	cg20154216	11	UBTFL1	TSS1500			36	0.0326948	0.0326948	1.51872	1.51872	Apple up vs Pear	0.285784	5.53603	0.336298	0.911207	1	0.858378	0.0428398	0.789354	0.808883	0.864414	0.11498	0.866584	0.824149	0.817987	0.869452	0.795424	0.276296	0.834543	0.833345	0.929691	0.860721	0.836784
755738	cg23916408	22	TAB1	Body			31	0.0331038	0.0331038	0.440205	-2.27167	Apple down vs Pear	-0.240303	5.50598	0.237777	0.647778	1	0.720028	0.106244	0.286602	0.172533	0.169444	0.726411	0.826365	0.260868	0.141121	0.112838	0.118828	0.236306	0.0567667	0.310698	0.25997	0.19601	0.193528
81689	cg02351082	5	C5orf60	3'UTR			1	0.0339326	0.0339326	0.434584	-2.30105	Apple down vs Pear	-0.29952	5.44637	0.369404	1.01739	1	0.181703	0.775416	0.0941071	0.794325	0.138685	0.232048	0.821159	0.182758	0.150342	0.205219	0.173677	0.795085	0.216504	0.159982	0.186544	0.779281	0.12345
303458	cg08964730	6	HLA-DQB1	Body	S_Shore		41	0.0339966	0.0339966	0.353275	-2.83066	Apple down vs Pear	-0.230029	5.44184	0.217879	0.600567	1	0.67541	0.402231	0.0499118	0.0411314	0.042635	0.456383	0.0232495	0.0573243	0.0359105	0.436654	0.040064	0.0410898	0.0436743	0.459207	0.0500264	0.452924	0.438495
831070	cg26576353	10			N_Shore		1	0.0343549	0.0343549	1.42302	1.42302	Apple up vs Pear	0.207925	5.41665	0.178018	0.492975	1	0.521121	0.509739	0.781704	0.552427	0.808031	0.560572	0.728472	0.799781	0.562239	0.793554	0.787035	0.216059	0.832177	0.238914	0.838597	0.545184	0.359496
232893	cg06841065	2	MYO3B	3'UTR			1	0.0352386	0.0352386	1.40903	1.40903	Apple up vs Pear	0.248591	5.4319	0.231741	0.597282	1	0.858567	0.138358	0.828969	0.883632	0.864909	0.849235	?	0.888871	0.806936	0.849149	0.825865	0.806801	0.893177	0.842555	0.879379	0.193997	0.79956
829137	cg26512469	13	MCF2L	Body	S_Shore		42	0.0353296	0.0353296	1.45136	1.45136	Apple up vs Pear	0.235451	5.34965	0.228272	0.640056	1	0.101229	0.112188	0.795033	0.591438	0.551073	0.79287	0.818201	0.838374	0.830835	0.823105	0.782555	0.608799	0.811012	0.871184	0.67634	0.623718	0.594499
601759	cg18321037	6			N_Shelf		0	0.0354057	0.0354057	1.78701	1.78701	Apple up vs Pear	0.256374	5.3445	0.270643	0.759593	1	0.224609	0.229253	0.811015	0.503035	0.473997	0.171934	0.789696	0.8484	0.253942	0.485563	0.494155	0.488511	0.495892	0.48197	0.973331	0.199759	0.17653
290392	cg08570077	7					22	0.0354306	0.0354306	0.622593	-1.60619	Apple down vs Pear	-0.29813	5.34282	0.365983	1.0275	1	0.844015	0.816627	0.151484	0.829054	0.13552	0.8398	0.835081	0.831697	0.494825	0.814398	0.154301	0.799113	0.536093	0.838046	0.132716	0.872652	0.522319
848189	cg27160931	4	ZFYVE28	Body	S_Shelf		1	0.0357106	0.0357106	0.598385	-1.67117	Apple down vs Pear	-0.325687	5.32403	0.436768	1.23056	1	0.83751	0.7783	0.816164	0.108222	0.117781	0.794072	0.769749	0.304761	0.804875	0.789317	0.837822	0.79287	0.160215	0.0227882	0.890616	0.875174	0.828928
24862	cg00696711	6	TULP4	TSS1500			46	0.0358619	0.0358619	1.29427	1.29427	Apple up vs Pear	0.210077	5.31395	0.181721	0.512955	1	0.916915	0.69176	0.962167	0.638768	0.971072	0.976617	0.945303	0.953858	0.920153	0.959109	0.933655	0.226472	0.965968	0.957908	0.977118	0.636134	0.604104
96745	cg02788935	10	DOCK1	Body			0	0.0360373	0.0360373	1.44254	1.44254	Apple up vs Pear	0.242764	5.30232	0.242671	0.686504	1	0.520465	0.528093	0.807957	0.851391	0.874428	0.851451	0.919558	0.892071	0.52097	0.828552	0.894336	0.0383047	0.878787	0.521905	0.842896	0.49331	0.488775
486749	cg14610645	4	SORCS2	Body			1	0.0366747	0.0366747	0.397842	-2.51356	Apple down vs Pear	-0.272738	5.26062	0.306295	0.873362	1	0.750938	0.041117	0.159665	0.670053	0.165015	0.118672	0.762667	0.0867094	0.0997489	0.0817434	0.123502	0.634718	0.157276	0.158367	0.0998823	0.651582	0.210843
450310	cg13574174	17					40	0.0369523	0.0369523	1.60898	1.60898	Apple up vs Pear	0.306135	5.24272	0.3859	1.1041	1	0.923882	0.550224	0.90663	0.541553	0.911248	0.53641	0.0252122	0.537571	0.927336	0.91994	0.555457	0.025691	0.929201	0.921568	0.937873	0.546989	0.910511
420155	cg12624040	2	B3GALT1	5'UTR			46	0.0373157	0.0373157	0.712039	-1.40442	Apple down vs Pear	-0.202085	5.21952	0.168159	0.483259	1	0.785066	0.727698	0.438586	0.458242	0.464103	0.437611	0.720174	0.45567	0.719824	0.775086	0.450479	0.692103	0.48899	0.709857	0.0361217	0.784346	0.765472
656518	cg20300784	2			S_Shelf		1	0.0374715	0.0374715	0.657013	-1.52204	Apple down vs Pear	-0.241031	5.20966	0.239218	0.688773	1	0.45794	0.737202	0.721119	0.451064	0.420334	0.721602	0.768184	0.790355	0.46154	0.752863	0.0346598	0.757565	0.0457842	0.464269	0.475115	0.742189	0.734505
616890	cg18857647	11	CREB3L1	Body	S_Shelf		18	0.0378355	0.0378355	2.01857	2.01857	Apple up vs Pear	0.238119	5.1868	0.233473	0.675194	1	0.180918	0.114055	0.586464	0.638948	0.60185	0.522121	0.222993	0	0.36756	0.608186	0.51845	0.266642	0.653391	0.0583375	0.685764	0.198624	0.131082
78230	cg02253420	19	ZNF790	1stExon	N_Shore	Promoter_Associated	1	0.0379702	0.0379702	0.260526	-3.83839	Apple down vs Pear	-0.235749	5.1784	0.228849	0.662894	1	0.0938	0.0799645	0.0805117	0.0902543	0.0648567	0.0774332	0.0787124	0.0899378	0.0734797	0.0841578	0.0638989	0.939253	0.0980686	0.0987833	0.0866236	0.471026	0.491453
804486	cg25637655	6	HLA-A	Body	S_Shore		3	0.0383558	0.0383558	0.638004	-1.56739	Apple down vs Pear	-0.230269	5.15456	0.218333	0.63536	1	0.742872	0.815622	0.170093	0.232734	0.591812	0.610391	0.147232	0.484558	0.376588	0.322251	0.306419	0.566961	0.498987	0.302083	0.772875	0.834042	0.735642
101407	cg02923394	20					1	0.0387005	0.0387005	1.69447	1.69447	Apple up vs Pear	0.31337	5.13348	0.404356	1.18153	1	0.881223	0.31891	0.832484	0.529193	0.843071	0.863101	0.808231	0.844275	0.822011	0.352467	0.847197	0	0.889211	0.812408	0.873728	0.202394	0.0847819
390369	cg11680857	1	LCE2D	TSS1500			1	0.0388305	0.0388305	1.3594	1.3594	Apple up vs Pear	0.213452	5.12558	0.187607	0.549031	1	0.842282	0.540732	0.78545	0.567885	0.8576	0.866717	0.525175	0.807814	0.84953	0.844505	0.880275	0.791158	0.85446	0.802484	0.823597	0.0535676	0.537725
403274	cg12080266	21	CLIC6	Body			30	0.038889	0.038889	1.42435	1.42435	Apple up vs Pear	0.243472	5.12205	0.244088	0.714816	1	0.908721	0.527002	0.884735	0.90118	0.891854	0.562429	0.0143633	0.860554	0.549015	0.863051	0.881052	0.523608	0.896225	0.54026	0.904307	0.595417	0.88472
205985	cg06031234	14					0	0.0391516	0.0391516	0.515859	-1.93851	Apple down vs Pear	-0.378054	5.10622	0.588515	1.72882	1	0.857516	0.887783	0.941262	0	0.0594501	0.885314	0.914351	0.595472	0.508363	0.896956	0.0478914	0.542016	0.0391571	0.0245979	0.915079	0.893139	0.486021
393897	cg11789991	5					37	0.0396118	0.0396118	0.707063	-1.4143	Apple down vs Pear	-0.22022	5.07879	0.199692	0.589783	1	0.86327	0.819677	0.520423	0.49113	0.528194	0.524854	0.905711	0.537204	0.0660193	0.501119	0.797131	0.85083	0.854578	0.549266	0.470391	0.833719	0.464295
363826	cg10831113	1					0	0.0396545	0.0396545	0.741281	-1.34902	Apple down vs Pear	-0.209142	5.07626	0.180107	0.532204	1	0.817688	0.804727	0.798039	0.766949	0.484236	0.804278	0.806548	0.0553544	0.791955	0.472957	0.504873	0.799463	0.508053	0.793663	0.816229	0.819518	0.806386
188939	cg05515244	16	CDH5	5'UTR			1	0.0402615	0.0402615	1.92152	1.92152	Apple up vs Pear	0.334741	5.04068	0.461389	1.37299	1	0.071747	0.734649	0.763107	0.0553212	0.796023	0.759897	0.83912	0.808681	0.787614	0.767492	0.732897	0.050352	0.75151	0.744162	0.773073	0.0383844	0.0485791
76923	cg02215595	9	GNAQ	Body			0	0.040619	0.040619	0.620213	-1.61235	Apple down vs Pear	-0.299482	5.02002	0.36931	1.10351	1	0.90691	0.474471	0.601965	0.105108	0.579373	0.931234	0.53289	0.570246	0.965964	0.867585	0.0876528	0.941425	0.549267	0.0952061	0.468347	0.909406	0.823539
847652	cg27141807	3	SPSB4	Body	S_Shore		27	0.0407446	0.0407446	1.81509	1.81509	Apple up vs Pear	0.263384	5.01281	0.285646	0.854748	1	0.683613	0.0468994	0.625013	0.493175	0.756549	0.646401	0.722667	0.78037	0.686223	0.437189	0.436134	0.0799923	0.499337	0.459751	0.691445	0.0457412	0.0366276
243329	cg07144177	6	EEF1E1-BLOC1S5	Body			7	0.0409246	0.0409246	0.726089	-1.37724	Apple down vs Pear	-0.213076	5.00253	0.186947	0.560559	1	0.784335	0.769148	0.0122894	0.758814	0.796318	0.729937	0.781654	0.452567	0.481154	0.779455	0.774384	0.783379	0.410277	0.704219	0.478806	0.813236	0.783643
396226	cg11857805	14			S_Shelf		38	0.0413162	0.0413162	1.60036	1.60036	Apple up vs Pear	0.286544	4.98033	0.338089	1.01827	1	0.902636	0.0313353	0.858862	0.883352	0.515628	0.861651	0.521322	0.854935	0.869706	0.870731	0.518239	0.495835	0.499074	0.903687	0.86405	0.510765	0.0174332
335726	cg09963080	16	ADCY9	Body	S_Shore		0	0.0420342	0.0420342	1.49691	1.49691	Apple up vs Pear	0.260638	4.94026	0.27972	0.849308	1	0.808585	0.835756	0.78744	0.776917	0.833533	0.777624	0.858516	0.837185	0.783594	0.782409	0.782844	0.162711	0.789679	0.831423	0.64655	0.146083	0.0823624
248093	cg07284498	16					0	0.0420969	0.0420969	1.45597	1.45597	Apple up vs Pear	0.224725	4.9368	0.207946	0.631824	1	0.749786	0.718679	0.694255	0.663443	0.770859	0.705665	0.429747	0.70523	0.721902	0.744805	0.724791	0.0516404	0.674071	0.721849	0.75458	0.0493612	0.7451
391019	cg11701583	12	NDUFA4L2	5'UTR	Island	Unclassified	14	0.0421686	0.0421686	0.188532	-5.30415	Apple down vs Pear	-0.241472	4.93285	0.240096	0.730092	1	0.0538904	0.0526856	0.0539042	0.053448	0.0496575	0.0500847	0.0302313	0.0713701	0.0544109	0.0651467	0.0537654	0.465591	0.0565597	0.0482166	0.0545433	0.939331	0.491209
646663	cg19935756	4	GABRB1	Body	N_Shelf		36	0.0422629	0.0422629	2.09814	2.09814	Apple up vs Pear	0.242941	4.92767	0.243026	0.739779	1	0.657944	0.0422181	0.31796	0.0473287	0.358563	0.0529412	0.0247589	0.621755	0.505418	0.580688	0.561268	0.305372	0.678968	0.290957	0.678802	0.412569	0.0528015
176989	cg05160251	2					47	0.0430138	0.0430138	0.62458	-1.60108	Apple down vs Pear	-0.264359	4.88686	0.287765	0.883282	1	0.711955	0.716583	0.396098	0.69384	0.735485	0.705019	0.688323	0.750189	0.0648469	0.692876	0.270041	0.688983	0.0138061	0.064607	0.716304	0.718315	0.700002
744374	cg23513244	18	NEDD4L	Body			1	0.0432233	0.0432233	1.32701	1.32701	Apple up vs Pear	0.211525	4.87563	0.184236	0.566806	1	0.889859	0.248967	0.853362	0.855933	0.839312	0.8947	0.892643	0.880353	0.883661	0.841803	0.865522	0.431173	0.834423	0.825394	0.903987	0.295544	0.875061
276878	cg08158105	12	BRI3BP	Body	N_Shore		28	0.0435152	0.0435152	1.7169	1.7169	Apple up vs Pear	0.346852	4.86008	0.495378	1.52892	1	0.239543	0.140001	0.919012	0.181169	0.887685	0.914357	0.952061	0.899197	0.918935	0.908936	0.880722	0.921702	0.903812	0.913283	0.893975	0.0631202	0.155963
332338	cg09858130	8					27	0.0435386	0.0435386	1.3942	1.3942	Apple up vs Pear	0.212384	4.85884	0.185735	0.573394	1	0.766138	0.46949	0.797529	0.44958	0.798459	0.785194	0.809128	0.794325	0.746756	0.763089	0.771665	0.43958	0.789958	0.809568	0.790627	0.478183	0.0236844
409452	cg12280242	4			S_Shelf		1	0.0436816	0.0436816	1.40329	1.40329	Apple up vs Pear	0.247539	4.91524	0.229782	0.654486	1	0.876297	0.264075	0.826424	0.847263	0.889405	0.857191	0.852019	0.874355	0.819212	0.855243	0.841106	0.054409	0.885861	0.869674	0.904776	?	0.778768
64601	cg01854994	15	FANCI	Body			19	0.044398	0.044398	1.3223	1.3223	Apple up vs Pear	0.219733	4.81378	0.19881	0.619504	1	0.875573	0.544713	0.895092	0.910421	0.860086	0.935282	0.902666	0.937492	0.861287	0.938824	0.896314	0.531808	0.921756	0.911794	0.881931	0.0741029	0.908223
815172	cg26033510	6					0	0.0445252	0.0445252	0.664258	-1.50544	Apple down vs Pear	-0.240733	4.80721	0.238626	0.74459	1	0.816617	0.869716	0.841619	0.615955	0.0555649	0.508167	0.551189	0.511592	0.512726	0.542877	0.580559	0.535647	0.569705	0.507211	0.0250383	0.864617	0.873168
99273	cg02863943	19	ZNF28	Body			0	0.044583	0.044583	0.566982	-1.76373	Apple down vs Pear	-0.32109	4.86711	0.405952	1.1677	1	0.524345	0.539325	0.0808367	0.642775	0.861095	0.558194	0.897303	0.535363	0.0626488	?	0.567157	0.873902	0.0780621	0.0848114	0.871085	0.907596	0.88995
595743	cg18110333	6	DUSP22	1stExon	Island	Promoter_Associated	0	0.0449923	0.0449923	0.487632	-2.05073	Apple down vs Pear	-0.234012	4.78322	0.22549	0.707128	1	0.487073	0.543993	0.00191231	0.460783	0.00638641	0.489407	0.558923	0.403113	0.0152459	0.428321	0.414043	0.576058	0.0142765	0.00266066	0.480408	0.534206	0.00743214
374412	cg11173002	5	SLIT3	Body			1	0.0451224	0.0451224	1.91483	1.91483	Apple up vs Pear	0.242564	4.7766	0.242271	0.760806	1	0.194728	0.171388	0.660972	0.685805	0.221219	0.68388	0.180845	0.190488	0.753814	0.698627	0.241944	0.241344	0.231246	0.692161	0.70084	0.193715	0.190133
339397	cg10075506	2	MYT1L	Body			7	0.0452379	0.0452379	0.721035	-1.3869	Apple down vs Pear	-0.213665	4.77073	0.187982	0.591047	1	0.796614	0.558215	0.247167	0.54568	0.521962	0.77515	0.607859	0.633214	0.238205	0.856491	0.341276	0.871348	0.729742	0.891306	0.517502	0.911704	0.840545
822791	cg26296371	6	FARS2	Body			41	0.0454852	0.0454852	1.88033	1.88033	Apple up vs Pear	0.28252	4.82007	0.314281	0.912836	1	0.0220203	0.559993	0.816459	0.505788	0.797884	0.511639	0.0504223	0.0320216	?	0.55711	0.768248	0.56285	0.826876	0.565591	0.561027	0.0560811	0.483472
307539	cg09094710	2	ROCK2	Body			50	0.0455935	0.0455935	0.464762	-2.15164	Apple down vs Pear	-0.284688	4.75278	0.333725	1.05325	1	0.392799	0.733955	0.378183	0.363221	0.366639	0.387093	0.0397874	0	0.00929678	0.0341468	0.0508306	0.722812	0.458104	0.777141	0.0344695	0.684485	0.762309
794766	cg25295696	7					0	0.0456333	0.0456333	1.34462	1.34462	Apple up vs Pear	0.216102	4.75078	0.192294	0.607145	1	0.864651	0.448735	0.831264	0.842369	0.840044	0.860748	0.85968	0.839384	0.843654	0.830409	0.85211	0.85159	0.847856	0.85646	0.848156	0.449327	0.0547499
471606	cg14183927	7			N_Shore		1	0.0458307	0.0458307	1.75493	1.75493	Apple up vs Pear	0.219451	4.7409	0.1983	0.627413	1	0.212791	0.160756	0.141072	0.637299	0.59942	0.586489	0.165054	0.611062	0.617058	0.550662	0.612016	0.618901	0.141526	0.653682	0.537615	0.141765	0.149077
169044	cg04926069	8					21	0.0458568	0.0458568	1.55399	1.55399	Apple up vs Pear	0.235474	4.7396	0.228315	0.722578	1	0.509952	0.0542306	0.483946	0.829276	0.502665	0.450946	0.759706	0.856945	0.779166	0.84718	0.507338	0.686049	0.789294	0.495399	0.514036	0.0573521	0.457116
515713	cg15546285	22	SFI1	Body			1	0.0460113	0.0460113	2.03489	2.03489	Apple up vs Pear	0.286059	4.7319	0.336947	1.06811	1	0.656829	0.110963	0.700127	0.66354	0.664042	0.0937753	0.0828768	0.0607748	0.735197	0.676979	0.0502493	0.12719	0.698896	0.689347	0.685582	0.198833	0.664433
776072	cg24634455	4	SH3BP2	5'UTR			0	0.0461347	0.0461347	2.04411	2.04411	Apple up vs Pear	0.288536	4.72578	0.342806	1.08809	1	0.0770187	0.0871275	0.0613987	0.57435	0.791316	0.572155	0.565552	0.568737	0.781493	0.436529	0.755996	0.0848591	0.0890123	0.805056	0.784929	0.0902952	0.457415
563450	cg17041723	6					11	0.0462218	0.0462218	1.64644	1.64644	Apple up vs Pear	0.202758	4.72146	0.16928	0.5378	1	0.350098	0.341587	0.456288	0.357429	0.591135	0.0758001	0.640203	0.449561	0.616593	0.109863	0.552842	0.103537	0.566627	0.645702	0.818059	0.321065	0.363271
398751	cg11938760	X	TMEM35	3'UTR	N_Shelf		0	0.0466333	0.0466333	1.34365	1.34365	Apple up vs Pear	0.202191	4.70122	0.168334	0.537098	1	0.815135	0.444555	0.755105	0.765252	0.785593	0.829207	0.76716	0.77986	0.75755	0.806557	0.776463	0.780856	0.822993	0.828292	0.827901	0.451709	0.0299381
865865	rs6991394							0.0468217	0.0468217	0.521365	-1.91804	Apple down vs Pear	-0.308332	4.69202	0.391458	1.25146	1	0.140113	0.918175	0.154327	0.951733	0.142353	0.514478	0.521984	0.512695	0.148583	0.49881	0.4994	0.963416	0.136412	0.151165	0.163099	0.951749	0.499411
555148	cg16769658	1	MAEL	Body			0	0.0481657	0.0481657	1.70915	1.70915	Apple up vs Pear	0.227686	4.62763	0.213463	0.69192	1	0.115908	0.116554	0.499718	0.520678	0.491506	0.13637	0.764799	0.506372	0.709554	0.726821	0.695053	0.48928	0.139443	0.50554	0.692887	0.123702	0.500882
19084	cg00534215	16	ACSF3	Body	Island	Unclassified_Cell_type_specific	19	0.0483259	0.0483259	1.86951	1.86951	Apple up vs Pear	0.345113	4.74793	0.44465	1.21747	1	0.251798	0.991797	0.988387	0.983867	0.307861	0.244166	0.385071	0.987962	0.974492	0.983992	?	0.355828	0.408481	?	0.301083	0.298466	0.251194
555167	cg16770312	20					1	0.0486464	0.0486464	1.32453	1.32453	Apple up vs Pear	0.203165	4.60511	0.169961	0.553604	1	0.797798	0.416979	0.770607	0.822004	0.827703	0.808388	0.812612	0.883549	0.798204	0.812989	0.905303	0.691475	0.856835	0.762956	0.851778	0.82122	0.0337205
621088	cg19017212	7	LINC-PINT	Body			1	0.0488727	0.0488727	2.42856	2.42856	Apple up vs Pear	0.257335	4.59461	0.272677	0.890208	1	0.255075	0	0.84353	0.267257	0.779026	0.21186	0.220139	0.147424	0.763192	0.187073	0.126977	0.0812813	0.238427	0.756244	0.265572	0.26009	0.232513
676202	cg21024280	6	CASC15	Body			33	0.0493005	0.0493005	1.58712	1.58712	Apple up vs Pear	0.29337	4.57489	0.354389	1.16196	1	0.83978	0.297063	0.910661	0.891855	0.889052	0.923535	0.556823	0.688291	0.869668	0.870313	0.908182	0	0.260758	0.883461	0.758198	0.120907	0.759611
492869	cg14799809	6	HLA-DQA1	Body			44	0.0494517	0.0494517	0.664374	-1.50518	Apple down vs Pear	-0.267652	4.56797	0.294978	0.968629	1	0.839198	0.812448	0.0603775	0.743384	0.384471	0.850345	0.73996	0.776471	0.25729	0.778225	0.781148	0.692067	0	0.692045	0.824778	0.882913	0.765364
22631	cg00631759	5	ADAMTS2	Body	N_Shore		0	0.0494709	0.0494709	1.65805	1.65805	Apple up vs Pear	0.299667	4.56709	0.369767	1.21445	1	0.127173	0.452279	0.15148	0.811916	0.817377	0.803891	0.83352	0.756539	0.797807	0.836193	0.833717	0.825502	0.857864	0.845975	0.841705	0.073128	0.0722375
558056	cg16866567	8	PLEKHA2	5'UTR	Island	Promoter_Associated	35	0.0495946	0.0495946	2.79508	2.79508	Apple up vs Pear	0.227352	4.56145	0.212836	0.699896	1	0.056455	0.068055	0.544309	0.0902962	0.101371	0.543049	0.0206813	0.554645	0.575189	0.481433	0.0970946	0.0615798	0.560431	0.0476942	0.487574	0.0858325	0.0509128
211533	cg06201514	2	MYT1L	Body			5	0.0496834	0.0496834	0.654292	-1.52837	Apple down vs Pear	-0.232051	4.55741	0.221727	0.729778	1	0.742146	0.367312	0.203212	0.371499	0.432785	0.692619	0.606727	0.507952	0.0940106	0.853351	0.120337	0.791549	0.633764	0.756696	0.418233	0.797395	0.7009

## Sheet: Apple vs Pear in GF_pread
Column #	Column ID	CHR	UCSC_RefGene_Name.0	UCSC_RefGene_Group.0	Relation_to_UCSC_CpG_Island	Regulatory_Feature_Group	SNP_DISTANCE.0	p-value(shape)	p-value(Apple vs. Pear)	MeanRatio(Apple vs. Pear)	FoldChange(Apple vs. Pear)	FoldChange(Apple vs. Pear) (Description)	Estimate(Apple vs. Pear)	F(shape)	SS(shape)	SS(Error)	F(Error)	201707285-01 (Intensity)	201707287-01 (Intensity)	201707305-01 (Intensity)	201707275-01 (Intensity)	201707289-01 (Intensity)	201707293-01 (Intensity)	201707295-01 (Intensity)	201712437-01 (Intensity)	201707297-01 (Intensity)	201707279-01 (Intensity)	201707299-01 (Intensity)	201707301-01 (Intensity)	201707281-01 (Intensity)	201707303-01 (Intensity)	201707283-01 (Intensity)	201707291-01 (Intensity)	201707277-01 (Intensity)
350781	cg10423996	3					1	3.91487e-06	3.91487e-06	3.6703	3.6703	Apple up vs Pear	0.379703	49.7525	0.593659	0.178984	1	0.0696653	0.360574	0.551441	0.614794	0.390583	0.045891	0.0994744	0.37264	0.520065	0.527312	0.491086	0.0461432	0.603958	0.556551	0.590548	0.0470328	0.326582
377896	cg11281224	4					3	4.94188e-05	4.94188e-05	0.669812	-1.49296	Apple down vs Pear	-0.250036	31.5088	0.257428	0.12255	1	0.825962	0.68922	0.567352	0.381218	0.374157	0.61386	0.745115	0.533551	0.530557	0.589709	0.357361	0.787483	0.568301	0.596672	0.573295	0.816778	0.822358
195448	cg05715076	14				Unclassified	45	9.94875e-05	9.94875e-05	1.69863	1.69863	Apple up vs Pear	0.231655	27.4763	0.220969	0.120632	1	0.503889	0.206575	0.527532	0.539766	0.564705	0.396762	0.426373	0.583328	0.599594	0.55122	0.587741	0.428345	0.535638	0.574814	0.568025	0.154232	0.204897
787534	cg25028792	19	GRIN3B	TSS1500	N_Shore		12	0.00010681	0.00010681	3.31111	3.31111	Apple up vs Pear	0.24417	27.0879	0.24549	0.135941	1	0.0538581	0.126456	0.281965	0.0964015	0.344249	0.0469508	0.126272	0.337217	0.500768	0.301689	0.428391	0.208887	0.47989	0.358754	0.368884	0.0830107	0.094119
145948	cg04238896	22	NCF4	Body			1	0.00010951	0.00010951	0.554102	-1.80472	Apple down vs Pear	-0.282177	26.9522	0.327863	0.18247	1	0.652941	0.584653	0.532615	0.225954	0.371359	0.658736	0.592741	0.317287	0.225694	0.252531	0.61572	0.555829	0.273893	0.344721	0.346748	0.772388	0.612518
865878	rs9839873							0.000131471	0.000131471	2.13146	2.13146	Apple up vs Pear	0.489518	25.9729	0.986704	0.569847	1	0.580589	0.0223825	0.956305	0.96384	0.96152	0.59068	0.59349	0.952292	0.958463	0.959908	0.959621	0.60317	0.589364	0.944684	0.975599	0.0449484	0.59323
559346	cg16908938	2	GREB1	3'UTR			20	0.000163568	0.000163568	0.691521	-1.44609	Apple down vs Pear	-0.253736	24.8337	0.265102	0.160126	1	0.839894	0.801049	0.51448	0.518901	0.504614	0.82718	0.776981	0.509686	0.478888	0.830767	0.522044	0.820851	0.801946	0.521407	0.485298	0.863849	0.827968
442230	cg13342259	17					1	0.00020434	0.00020434	3.22762	3.22762	Apple up vs Pear	0.397007	23.7072	0.649	0.410635	1	0.0711495	0.486877	0.454662	0.461716	0.713344	0.061138	0.0636648	0.486492	0.481575	0.454832	0.509523	0.474477	0.732773	0.729637	0.72771	0.044224	0.0460082
403051	cg12074150	2					42	0.000262122	0.000262122	0.203783	-4.90717	Apple down vs Pear	-0.539104	22.4864	1.19672	0.798299	1	0.528972	0.820612	0.0741296	0.466948	0.0529849	0.0484388	0.772106	0.0753722	0.0472543	0.0525121	0.44458	0.843323	0.0666057	0.0584246	0.0409668	0.884414	0.841707
526945	cg15897435	4	MRPL1	Body			0	0.000345802	0.000345802	10.6981	10.6981	Apple up vs Pear	0.362249	21.1758	0.540336	0.38275	1	0.0300056	0.0370672	0.0215839	0.453955	0.460933	0.0314771	0.0347343	0.440116	0.0458588	0.5047	0.450335	0.0515439	0.474798	0.688885	0.454851	0.0332743	0.043365
667312	cg20697683	3	GP5	TSS1500	S_Shelf		11	0.000401868	0.000401868	2.4126	2.4126	Apple up vs Pear	0.401172	20.4854	0.662691	0.485241	1	0.677015	0	0.708579	0.667447	0.684181	0.663281	0.264033	0.742302	0.671554	0.669311	0.661637	0.229223	0.68264	0.693846	0.67019	0.154423	0
626992	cg19240319	1			Island			0.000411082	0.000411082	2.2579	2.2579	Apple up vs Pear	0.215669	20.3825	0.191525	0.140948	1	0.0784508	0.118421	0.419311	0.39727	0.404099	0.328256	0.112841	0.255475	0.249955	0.444354	0.481342	0.0874774	0.405556	0.528959	0.28489	0.287808	0.186909
246433	cg07234876	8			Island		25	0.000479567	0.000479567	1.48186	1.48186	Apple up vs Pear	0.286033	19.6912	0.336886	0.256627	1	0.567243	0.578965	0.596255	0.959523	0.952469	0.862559	0.570081	0.951905	0.938388	0.946392	0.935763	0.528727	0.664551	0.881995	0.969065	0.467515	0.580091
634856	cg19525261	11					25	0.000495484	0.000495484	0.116677	-8.57066	Apple down vs Pear	-0.402228	19.5465	0.666183	0.511229	1	0.0730522	0.708924	0.0200946	0.0457308	0.0451309	0.0457346	0.496182	0.0177786	0.0401917	0.0626465	0.0610062	0.540035	0.0690669	0.0101168	0.159536	0.55522	0.768356
365312	cg10879348	2	LIMS1	5'UTR			49	0.000534805	0.000534805	0.519703	-1.92418	Apple down vs Pear	-0.374138	19.2108	0.576387	0.450049	1	0.814417	0.839744	0.482314	0.498656	0.50102	0.828901	0.503331	0.0238284	0.510076	0.451912	0.527791	0.848753	0.530959	0.489983	0.031803	0.8129	0.804764
572583	cg17330030	22	MYO18B	5'UTR			33	0.000598029	0.000598029	2.75467	2.75467	Apple up vs Pear	0.269803	18.7258	0.299738	0.240101	1	0.500186	0.0299481	0.395385	0.413064	0.446856	0.0618394	0.303209	0.315083	0.393728	0.436312	0.348881	0	0.534101	0.430189	0.522061	0.107034	0.0741254
639979	cg19707454	7	ZDHHC4	TSS1500	N_Shore		4	0.000610953	0.000610953	2.55844	2.55844	Apple up vs Pear	0.287452	18.6338	0.340235	0.273885	1	0.201736	0.209542	0.370451	0.292816	0.532981	0.169298	0.164711	0.351644	0.466241	0.509886	0.282025	0.264304	0.496276	0.549382	0.867302	0.11708	0.164471
469716	cg14129329	9	VAV2	Body			0	0.000701417	0.000701417	2.31402	2.31402	Apple up vs Pear	0.210136	18.6897	0.17387	0.130241	1	0.357897	0.0986589	0.304787	0.353512	0.454394	0.187889	0.202361	0.456091	0.46514	0.261278	?	0.053762	0.403161	0.409551	0.222588	0.064612	0.154256
174879	cg05096415	10	LRIT2	TSS200			0	0.000796653	0.000796653	2.59379	2.59379	Apple up vs Pear	0.392382	17.5144	0.633969	0.542955	1	0.392346	0.0549596	0.619186	0.455212	0.675994	0.732212	0.0392396	0.730872	0.656951	0.438683	0.675363	0.038538	0.714231	0.679016	0.740259	0.0609135	0.405151
843996	cg27019651	18					1	0.000815772	0.000815772	0.291757	-3.42751	Apple down vs Pear	-0.269673	17.4163	0.299449	0.257904	1	0.0923016	0.570644	0.0957472	0.0681076	0.0576517	0.30226	0.339775	0.0826185	0.0465764	0.398109	0.098854	0.570909	0.0963659	0.0876657	0.079208	0.398459	0.390995
391508	cg11716267	2	LOC375190	Body			0	0.000892023	0.000892023	0.349932	-2.85769	Apple down vs Pear	-0.382102	17.0497	0.601184	0.52891	1	0.512408	0.50233	0.0859057	0.0779167	0.0771452	0.4684	0.50723	0.479409	0.510764	0.0824006	0.491806	0.815316	0.0828205	0.0990704	0.0696236	0.851016	0.457816
822552	cg26287822	X	ZCCHC16	5'UTR	N_Shore		0	0.00103264	0.00103264	2.79941	2.79941	Apple up vs Pear	0.451963	16.4588	0.841114	0.766566	1	0.408383	0.0363593	0.744646	0.82568	0.769145	0.791798	0.436128	0.770484	0.747193	0.422744	0.399614	0.0445815	0.799112	0.746005	0.806736	0.019401	0.02156
145811	cg04234574	3	KCNMB3	TSS1500			41	0.00104189	0.00104189	2.03687	2.03687	Apple up vs Pear	0.269327	16.4231	0.298683	0.272801	1	0.480312	0	0.522943	0.567972	0.527804	0.533642	0.0608138	0.592066	0.494979	0.481882	0.540128	0.11313	0.500876	0.483186	0.578946	0.311417	0.318941
25063	cg00701918	17	RPTOR	Body			44	0.00115736	0.00115736	1.64829	1.64829	Apple up vs Pear	0.293868	16.0066	0.355594	0.333231	1	0.780265	0.484125	0.744882	0.698352	0.698067	0.527953	0.447829	0.941451	0.871247	0.711619	0.597392	0.24758	0.873611	0.632526	0.702491	0.200877	0.484439
389829	cg11663691	4			S_Shelf		0	0.00120052	0.00120052	4.39079	4.39079	Apple up vs Pear	0.42173	15.863	0.732348	0.692507	1	0.515334	0.0547826	0.433615	0.49166	0.618697	0.0613221	0.100528	0.0321819	0.575811	0.488491	0.544646	0.0741605	0.52119	0.8614	0.893354	0.0540633	0.0104335
756981	cg23958373	8			Island		33	0.00124093	0.00124093	1.36568	1.36568	Apple up vs Pear	0.219343	15.7337	0.198105	0.188868	1	0.573483	0.574631	0.566	0.859799	0.87404	0.833618	0.606094	0.853197	0.863586	0.878938	0.875956	0.558536	0.664919	0.846676	0.908488	0.458813	0.593546
401056	cg12012426	4	KIAA1530	Body	Island		38	0.00136934	0.00136934	2.39966	2.39966	Apple up vs Pear	0.404455	15.3526	0.673582	0.658111	1	0.29749	0.288687	0.835498	0.845457	0.879346	0.270774	0.194942	0.317994	0.894772	0.275159	0.853727	0.348732	0.864108	0.335397	0.832756	0.372675	0.249462
183686	cg05355592	3	PTPRG	Body			3	0.00141374	0.00141374	2.14431	2.14431	Apple up vs Pear	0.477888	15.2302	0.940377	0.926163	1	0.905503	0.493253	0.901239	0.876665	0.864036	0.893547	0.527574	0.875658	0.902572	0.896266	0.92329	0.0382969	0.892636	0.918409	0.904316	0.0220959	0.0430722
78672	cg02266339	3	GP5	TSS1500	S_Shelf		19	0.00159427	0.00159427	1.85038	1.85038	Apple up vs Pear	0.331119	14.7741	0.451459	0.458362	1	0.687499	0.0694192	0.716624	0.725703	0.713312	0.674875	0.392381	0.768741	0.755319	0.689727	0.66268	0	0.706465	0.760207	0.706199	0.541699	0.359776
552954	cg16702660	14					0	0.00160351	0.00160351	2.29341	2.29341	Apple up vs Pear	0.246128	14.7524	0.249442	0.253629	1	0.0649522	0.0708182	0.337738	0.377668	0.37953	0.0591272	0.346182	0.568251	0.525823	0.384364	0.391543	0.371088	0.372455	0.389964	0.636876	0.0430236	0.376863
490840	cg14737079	22	LOC101928891	TSS1500	N_Shore		51	0.00164422	0.00164422	0.408064	-2.4506	Apple down vs Pear	-0.510019	15.1065	1.02422	0.9492	1	0.855102	0.952631	0.225754	0.903979	?	0.896472	0.651326	0.344915	0.0884635	0.20779	0	0.896984	0.87342	0.0742379	0.445778	0.889625	0.889145
409386	cg12278099	16					31	0.00172058	0.00172058	0.670586	-1.49123	Apple down vs Pear	-0.225384	14.4886	0.209169	0.216551	1	0.45318	0.813221	0.520845	0.534085	0.495622	0.496209	0.540871	0.42748	0.40054	0.521011	0.413901	0.796577	0.435772	0.446617	0.39226	0.856597	0.832727
834805	cg26705599	13			Island		9	0.00176598	0.00176598	0.495398	-2.01858	Apple down vs Pear	-0.386826	14.3918	0.616142	0.642179	1	0.783807	0.758111	0.0365557	0.436823	0.437171	0.781024	0.730891	0.0313247	0.739708	0.733194	0.472281	0.716882	0.417461	0.0346968	0.45849	0.812601	0.782861
425334	cg12795959	20	SIRPB1	Body				0.00184128	0.00184128	10.737	10.737	Apple up vs Pear	0.406	14.2373	0.678736	0.715095	1	0.169427	0	0.678889	0.0343939	0.70541	0	0.0463424	0.0504193	0.536181	0.538095	0.657508	0	0.576568	0.620203	0.0792997	0.0761074	0
666941	cg20685672	2					1	0.00189052	0.00189052	1.67164	1.67164	Apple up vs Pear	0.320464	14.1402	0.422871	0.448585	1	0.557993	0.562773	0.92662	0.8901	0.89835	0.536992	0.529512	0.889659	0.53414	0.915818	0.583047	0.577933	0.904132	0.58325	0.850886	0.049859	0.52489
539315	cg16288713	13	RNF219	TSS1500	S_Shore		16	0.00192925	0.00192925	2.19421	2.19421	Apple up vs Pear	0.209963	14.0657	0.181525	0.193582	1	0.409545	0.115354	0.465759	0.231782	0.432141	0.140093	0.162542	0.144497	0.441938	0.353991	0.54167	0.083009	0.370535	0.437473	0.438016	0.168985	0.151191
402078	cg12045035	15					0	0.00193747	0.00193747	1.87932	1.87932	Apple up vs Pear	0.355701	14.0501	0.520977	0.556197	1	0.780387	0.0737151	0.654641	0.828217	0.75102	0.534859	0.715487	0.734399	0.704289	0.753544	0.817123	0.080076	0.799622	0.761501	0.797833	0.169403	0.477699
712120	cg22349483	10	CELF2	Body			2	0.00196749	0.00196749	0.338286	-2.95608	Apple down vs Pear	-0.444506	14.4072	0.740945	0.720001	1	0.292052	0.928689	0.382925	0.229554	0.164246	?	0.875102	0.168399	0.129844	0.210655	0.212544	0.123711	0.196114	0.353798	0.224357	0.915942	0.894999
230248	cg06766860	12	GALNT9	Body	N_Shore		4	0.0023066	0.0023066	1.68952	1.68952	Apple up vs Pear	0.297631	13.8031	0.3488	0.353774	1	0.276242	0.661148	0.690832	0.794655	0.684457	0.707738	0.370557	0.820234	0.751399	0.651588	0.700569	0.229362	?	0.665759	0.804015	0.144007	0.632482
299185	cg08839358	2	ATL2	Body			0	0.00235201	0.00235201	2.27134	2.27134	Apple up vs Pear	0.390838	13.3494	0.628988	0.706759	1	0.792746	0.0885431	0.786214	0.76158	0.461861	0.500231	0.531357	0.801105	0.806999	0.497066	0.792754	0.0819812	0.529424	0.765786	0.779823	0.0535933	0.103511
92894	cg02675432	2	PSMD14	Body			26	0.00237544	0.00237544	0.466264	-2.14471	Apple down vs Pear	-0.484557	13.3141	0.966805	1.08923	1	0.948595	0.891052	0.874038	0.273642	0.102999	0.846798	0.959774	0.242217	0.188171	0.909441	0.41674	0.920253	0	0.315734	0.91003	0.888332	0.900205
294381	cg08693140	7			N_Shore		0	0.00239665	0.00239665	2.08623	2.08623	Apple up vs Pear	0.29577	13.2825	0.360212	0.40679	1	0.654203	0.408792	0.56882	0.609311	0.597857	0.0365642	0.0530523	0.617247	0.643655	0.377077	0.418343	0.0510577	0.609103	0.601603	0.637603	0.353978	0.348393
519314	cg15657730	20	PLCB1	Body			0	0.0024245	0.0024245	1.32134	1.32134	Apple up vs Pear	0.219881	13.2414	0.199079	0.225518	1	0.905951	0.532043	0.9187	0.887885	0.941361	0.910181	0.844672	0.892754	0.891885	0.887303	0.895052	0.506785	0.925044	0.878689	0.922824	0.578837	0.511411
309200	cg09145734	10	ABLIM1	Body			0	0.00246257	0.00246257	0.453697	-2.20411	Apple down vs Pear	-0.264883	13.1862	0.288908	0.328649	1	0.454549	0.278055	0.147515	0.191859	0.1712	0.470491	0.194252	0.118598	0.158743	0.385843	0.269429	0.635023	0.177416	0.415942	0.163278	0.731338	0.630354
822718	cg26294145	14					2	0.00248773	0.00248773	0.422912	-2.36456	Apple down vs Pear	-0.221487	13.1502	0.201998	0.230413	1	0.228046	0.522891	0.182606	0.119365	0.183684	0.143118	0.233583	0.251965	0.156232	0.0456887	0.183051	0.445085	0.25546	0.167253	0.0778371	0.525765	0.588125
79231	cg02282391	21	PCNT	ExonBnd			47	0.0025287	0.0025287	0.393843	-2.53908	Apple down vs Pear	-0.568404	13.4603	1.27214	1.32314	1	0.885055	0.90568	0.153461	0.899638	0.901215	0.958015	0.955601	0.138805	0.12766	0.915667	0.144167	0.904297	?	0	0.0432074	0.984016	0.971354
559021	cg16899969	3			N_Shelf		35	0.0025495	0.0025495	2.18093	2.18093	Apple up vs Pear	0.371437	13.0636	0.568092	0.652302	1	0.675929	0	0.697065	0.690971	0.693759	0.628078	0.681282	0.68859	0.657519	0.703342	0.696942	0	0.696295	0.63221	0.702967	0.13213	0.0842864
131529	cg03810198	17	MXRA7	Body		Unclassified_Cell_type_specific	0	0.00258884	0.00258884	0.212363	-4.70892	Apple down vs Pear	-0.388755	13.8102	0.544068	0.512151	1	0.448271	0.810221	0.0555132	0.0777571	0.0545176	0.0607346	?	0.0636816	0.0590238	0.0570695	0.456528	0.444497	?	0.0579419	0.061313	0.428036	0.769666
141449	cg04109990	9	LURAP1L	Body			0	0.0027478	0.0027478	2.24466	2.24466	Apple up vs Pear	0.292932	12.8009	0.353332	0.414033	1	0.454944	0.0273969	0.665699	0.403911	0.638652	0.521748	0.395301	0.492884	0.660204	0.574467	0.499055	0.220097	0.419961	0.344545	0.583458	0.0117774	0.0161981
614026	cg18759144	4	CYP2U1	3'UTR			46	0.00276588	0.00276588	1.68082	1.68082	Apple up vs Pear	0.334434	12.778	0.460543	0.540628	1	0.787661	0.478321	0.787163	0.800202	0.782035	0.177476	0.827624	0.821219	0.816482	0.879003	0.866631	0.732131	0.858716	0.817804	0.827278	0.109365	0.325958
253126	cg07437923	16	DNAJA3	3'UTR			2	0.0029589	0.0029589	0.298335	-3.35193	Apple down vs Pear	-0.288109	12.544	0.341793	0.408713	1	0.453216	0.488351	0.0463809	0.045835	0.0482959	0.428079	0.0259615	0.040783	0.42796	0.424449	0.043784	0.485435	0.0600504	0.028398	0.059051	0.517739	0.475473
782700	cg24859648	20	BANF2	TSS200			0	0.00316097	0.00316097	0.352319	-2.83834	Apple down vs Pear	-0.247796	12.317	0.252835	0.307911	1	0.331981	0.575141	0.0495679	0.355839	0.0382198	0.306979	0.282454	0.0429998	0.0468397	0.349209	0.334512	0.28971	0.0446217	0.0540545	0.0320712	0.298957	0.592903
192894	cg05638439	16	WDR90	Body	Island	Gene_Associated	1	0.00322083	0.00322083	1.97683	1.97683	Apple up vs Pear	0.259184	12.2529	0.276608	0.338625	1	0.347749	0.170935	0.590081	0.352344	0.218092	0.392823	0.337422	0.538344	0.598352	0.592519	0.641511	0.121049	0.618316	0.787322	0.308281	0.203058	0.28429
469105	cg14111685	2			Island		28	0.0033024	0.0033024	0.709976	-1.4085	Apple down vs Pear	-0.207814	12.1677	0.177828	0.219221	1	0.553157	0.754665	0.326778	0.690063	0.677048	0.71002	0.70509	0.341502	0.56816	0.55569	0.561318	0.765637	0.348721	0.624057	0.39394	0.788014	0.739211
605544	cg18455878	12	VDR	Body			0	0.0033358	0.0033358	0.425113	-2.35232	Apple down vs Pear	-0.401849	12.1335	0.664929	0.822017	1	0.782028	0.823212	0.771805	0.424933	0.412783	0.409699	0.808062	0.415864	0.0309558	0.0291444	0.0336708	0.834322	0.405252	0.410508	0.0366456	0.840376	0.395338
17461	cg00491047	14	EFS	Body	N_Shelf		2	0.00388496	0.00388496	3.64549	3.64549	Apple up vs Pear	0.513135	11.6216	1.08421	1.39939	1	0.173097	0.0947229	0.852609	0.868398	0.863411	0.861911	0	0.840046	0.872336	0.842897	0.852157	0.147276	0.147879	0.100065	0.831219	0.0807571	0
447874	cg13506281	13	MTUS2	Body	Island		25	0.00392408	0.00392408	1.79389	1.79389	Apple up vs Pear	0.330274	11.5884	0.449156	0.581389	1	0.837919	0.411359	0.807683	0.430588	0.842087	0.37639	0.426936	0.833483	0.797684	0.813824	0.815179	0.427794	0.427871	0.847223	0.847309	0.399541	0.0321948
29010	cg00814218	14	SLC25A21	Body		Unclassified_Cell_type_specific	0	0.00398909	0.00398909	3.3444	3.3444	Apple up vs Pear	0.37049	11.5339	0.565201	0.735052	1	0.438996	0.05755	0.396475	0.408611	0.817509	0.437489	0.0539425	0.445656	0.0508117	0.762618	0.777009	0.0503823	0.718849	0.442038	0.465644	0.0273829	0.0404807
51507	cg01465323	3	FBLN2	TSS1500	N_Shore		44	0.0040634	0.0040634	1.41518	1.41518	Apple up vs Pear	0.206756	11.4729	0.176021	0.230135	1	0.591111	0.313498	0.719026	0.727336	0.757828	0.745696	0.413812	0.711862	0.505312	0.733225	0.724339	0.399543	0.544399	0.792083	0.832065	0.424992	0.597292
744903	cg23529320	1					10	0.00407523	0.00407523	1.4326	1.4326	Apple up vs Pear	0.203566	11.4633	0.170631	0.223275	1	0.386483	0.685052	0.764585	0.64096	0.577906	0.677652	0.437166	0.607082	0.676615	0.634794	0.712914	0.542766	0.688149	0.625647	0.812673	0.316763	0.248086
445635	cg13443681	3					47	0.00413437	0.00413437	4.23297	4.23297	Apple up vs Pear	0.454946	11.4158	0.852252	1.11983	1	0.0401899	0	0.0526698	0.109151	0.786677	0.0453715	0.081244	0.579673	0.871786	0.458103	0.840979	0.0698534	0.821483	0.915222	0.520915	0.575353	0.173031
464782	cg13989295	17	SKA2	3'UTR	S_Shelf		1	0.00419084	0.00419084	4.94366	4.94366	Apple up vs Pear	0.301412	11.3711	0.374084	0.493465	1	0.027645	0.0281711	0.0205452	0.379816	0.386479	0.332201	0.0161447	0.0356559	0.39059	0.696562	0.408464	0.0693459	0.420649	0.406385	0.633264	0.0245075	0.0369914
529237	cg15972370	7	TPK1	Body			0	0.00429051	0.00429051	1.75732	1.75732	Apple up vs Pear	0.371056	11.294	0.566929	0.752959	1	0.862544	0.0277402	0.847409	0.8172	0.890647	0.859184	0.539985	0.892941	0.829318	0.864375	0.878251	0.57945	0.90905	0.847821	0.833178	0	0.560836
40054	cg01130157	7					0	0.00437778	0.00437778	1.83389	1.83389	Apple up vs Pear	0.231019	11.2281	0.219759	0.293582	1	0.500494	0.200536	0.559157	0.544326	0.587596	0.222717	0.16695	0.591514	0.357346	0.555029	0.430952	0.064293	0.569457	0.324103	0.561095	0.568866	0.215411
714775	cg22453403	7	DENND2A	Body				0.00438115	0.00438115	1.6237	1.6237	Apple up vs Pear	0.209036	11.2256	0.179924	0.24042	1	0.151069	0.215379	0.467168	0.477187	0.715089	0.312993	0.397095	0.537459	0.465835	0.654202	0.503617	0.323018	0.558769	0.322343	0.740251	0.50589	0.440651
605587	cg18457108	3	C3orf21	Body			0	0.00448335	0.00448335	2.09954	2.09954	Apple up vs Pear	0.36793	11.1504	0.557415	0.749857	1	0.802723	0.443068	0.789374	0.837978	0.446895	0.443912	0.0727022	0.834974	0.813637	0.44921	0.786566	0.458528	0.802009	0.806977	0.457902	0.0574072	0.0640178
722698	cg22741595	11	C11orf67	5'UTR	S_Shore	Promoter_Associated	8	0.00453489	0.00453489	0.0947831	-10.5504	Apple down vs Pear	-0.316329	11.1132	0.412028	0.556132	1	0.562166	0.0356652	0.0209993	0.0376692	0.0229244	0.626869	0.0240849	0.0249122	0.0396426	0	0.00655523	0.566507	0.0749947	0.0484417	0.0550813	0.0191924	0.611672
511436	cg15402732	5	CEP72	Body	N_Shelf		43	0.00474795	0.00474795	1.38467	1.38467	Apple up vs Pear	0.238272	10.9645	0.233774	0.319816	1	0.874658	0.466253	0.862559	0.842164	0.853292	0.869646	0.85059	0.84785	0.854798	0.872373	0.863682	0.443639	0.846443	0.877002	0.856734	0.416968	0.414167
274422	cg08084984	16	XYLT1	Body			0	0.00484023	0.00484023	10.8178	10.8178	Apple up vs Pear	0.412054	10.9024	0.699131	0.961894	1	0.0453725	0.0557347	0.0411252	0.0461823	0.473478	0.032245	0.0427235	0.0432897	0.46356	0.845567	0.823429	0.0424043	0.471544	0.471623	0.860446	0.0358456	0.0394642
39416	cg01111656	13	PCCA	Body		Unclassified	37	0.0048981	0.0048981	1.85624	1.85624	Apple up vs Pear	0.447658	10.8642	0.825167	1.1393	1	0.308719	0.0227268	0.964898	0.963267	0.962505	0.941877	0	0.974756	0.985593	0.971432	0.976618	0.458213	0.967807	0.959255	0.978647	0.972775	0.955428
244149	cg07166908	17					39	0.00492685	0.00492685	1.95077	1.95077	Apple up vs Pear	0.382281	10.8453	0.601749	0.832268	1	0.300541	0	0.804912	0.785407	0.881511	0.870008	0.789222	0.785712	0.696354	0.763135	0.757369	0.0182441	0.836038	0.731713	0.801418	0.662266	0.174249
189848	cg05544622	Y	TSPY1	TSS1500	Island			0.00499131	0.00499131	0.356008	-2.80893	Apple down vs Pear	-0.213201	11.3796	0.163636	0.186937	1	0.183322	?	0.0477834	0.151763	0.140925	0.439544	0.164678	0.174435	0.18898	0.0241345	0.0345305	0.372631	0	?	0.298192	0.283711	0.54248
381895	cg11405538	5					26	0.00510765	0.00510765	1.42749	1.42749	Apple up vs Pear	0.25837	10.7299	0.274874	0.384265	1	0.932511	0.61669	0.813748	0.938917	0.946887	0.671606	0.626116	0.907341	0.906287	0.94288	0.725956	0.470414	0.784122	0.926157	0.73534	0.720484	0.192932
195087	cg05704942	1	MRTO4	Body	S_Shelf		1	0.00511687	0.00511687	0.483399	-2.06868	Apple down vs Pear	-0.324469	10.7241	0.433506	0.606353	1	0.702967	0.707029	0.648188	0.426024	0.41609	0.427568	0.742603	0.395783	0.48688	0.0550327	0.0623245	0.660635	0.452677	0.0489325	0.0442271	0.767987	0.387804
101239	cg02919082	6	HLA-DQA1	Body			2	0.00518118	0.00518118	0.693107	-1.44278	Apple down vs Pear	-0.233914	10.6842	0.2253	0.316307	1	0.841987	0.742405	0.217436	0.582142	0.443781	0.840627	0.716407	0.636336	0.263087	0.689502	0.692583	0.721633	0.413496	0.675063	0.669431	0.704553	0.767784
206516	cg06047886	8	KBTBD11	5'UTR	N_Shelf	Unclassified_Cell_type_specific	47	0.00519437	0.00519437	0.581448	-1.71984	Apple down vs Pear	-0.255405	10.6761	0.268601	0.377385	1	0.459718	0.784611	0.385751	0.641814	0.297368	0.311911	0.580143	0.305124	0.27308	0.420666	0.132765	0.74521	0.426498	0.260729	0.404266	0.8291	0.560782
480987	cg14449263	4					0	0.00529108	0.00529108	2.06552	2.06552	Apple up vs Pear	0.32416	10.6174	0.432682	0.611284	1	0.716891	0.0331153	0.679827	0.455223	0.77242	0.388172	0.434559	0.636212	0.719709	0.73675	0.428929	0.0311501	0.69489	0.732746	0.427183	0.0433545	0.482358
704858	cg22071943	5	SLC6A18	TSS200	N_Shore		42	0.00531844	0.00531844	0.432942	-2.30978	Apple down vs Pear	-0.325852	10.601	0.437209	0.618634	1	0.638293	0.16087	0.0642425	0.219098	0.223525	0.661551	0.603887	0.624489	0.646684	0.11457	0.197748	0.597517	0.152416	0.0360554	0.209008	0.693946	0.666384
414783	cg12454169	2	LCLAT1	TSS1500	N_Shore	Promoter_Associated		0.005419	0.005419	1.80074	1.80074	Apple up vs Pear	0.212632	10.5415	0.186168	0.264907	1	0.250587	0.302719	0.307231	0.301928	0.330361	0.230924	0.286279	0.570382	0.566506	0.264819	0.601682	0.291366	0.545826	0.505179	0.787834	0.245757	0.251168
865866	rs715359							0.00542582	0.00542582	2.28956	2.28956	Apple up vs Pear	0.457387	10.5376	0.861425	1.22622	1	0.959567	0.0414738	0.958096	0.94349	0.966192	0.480776	0.470717	0.478361	0.477399	0.955585	0.949423	0.0268374	0.971242	0.457526	0.963416	0.480913	0.0225151
3950	cg00106112	2	KLHL29	Body			1	0.0055207	0.0055207	1.3774	1.3774	Apple up vs Pear	0.208993	10.4827	0.179851	0.257355	1	0.808726	0.469221	0.788953	0.785065	0.786819	0.7797	0.457179	0.804287	0.474067	0.781762	0.782485	0.473698	0.797674	0.820917	0.805667	0.432199	0.455711
93904	cg02706652	16	ERN2	Body			0	0.00574949	0.00574949	1.69761	1.69761	Apple up vs Pear	0.270252	10.3547	0.300737	0.435652	1	0.416136	0.0664489	0.670555	0.651011	0.666626	0.707257	0.402165	0.637691	0.638186	0.641021	0.621345	0.405737	0.68582	0.676336	0.687895	0.0235591	0.690473
723455	cg22772380	7	ZNF12	TSS1500	S_Shore	Unclassified	9	0.00577598	0.00577598	1.9642	1.9642	Apple up vs Pear	0.201233	10.5832	0.159448	0.210926	1	0.435767	0.12498	0.257351	0.438844	0.321321	0.346935	0.0919495	?	0.48679	0.463505	0.505742	0.282169	0.317054	0.356414	0.542423	0.0309772	0.148159
519133	cg15652532	2	LCLAT1	TSS1500	N_Shore	Promoter_Associated	25	0.00583263	0.00583263	2.16411	2.16411	Apple up vs Pear	0.264585	10.3097	0.288257	0.419398	1	0.251667	0.29628	0.266843	0.277095	0.266659	0.233519	0.274131	0.615081	0.613781	0.234156	0.621601	0.179344	0.5767	0.604477	0.842313	0.153561	0.202498
652220	cg20139683	12	POLE	Body	Island		49	0.00583417	0.00583417	2.55136	2.55136	Apple up vs Pear	0.487212	10.3088	0.977427	1.42222	1	0.888322	0.893176	0.854709	0.147994	0.879569	0.0224503	0.0100383	0.866395	0.899234	0.882098	0.882604	0.11792	0.863645	0.873487	0.862934	0.139824	0.126655
347744	cg10326673	2	LCLAT1	TSS1500	N_Shore	Promoter_Associated	23	0.0058862	0.0058862	2.53571	2.53571	Apple up vs Pear	0.285609	10.281	0.335886	0.490058	1	0.216913	0.255198	0.269918	0.24022	0.219285	0.180393	0.226352	0.629099	0.562835	0.193991	0.575936	0.152611	0.553262	0.578379	0.892948	0.10507	0.165313
343454	cg10195365	3	FLNB	Body			0	0.00643098	0.00643098	2.77439	2.77439	Apple up vs Pear	0.351516	10.0055	0.50879	0.762763	1	0.430641	0.0340763	0.709856	0.737136	0.751657	0.020154	0.446326	0.450062	0.740855	0.422334	0.461832	0.0241336	0.462358	0.730691	0.0294317	0.408803	0.0226038
206902	cg06060457	22					9	0.00652084	0.00652084	0.513256	-1.94835	Apple down vs Pear	-0.231203	9.96267	0.220107	0.331398	1	0.328595	0.374578	0.314335	0.0498948	0.552252	0.50133	0.560217	0.046807	0.314675	0.0640407	0.0493946	0.531737	0.33026	0.346589	0.369706	0.52038	0.508148
44247	cg01252526	16	WDR90	Body	N_Shore	Gene_Associated	3	0.00655861	0.00655861	2.70856	2.70856	Apple up vs Pear	0.210351	9.94486	0.182196	0.27481	1	0.217816	0.0823159	0.365772	0.240916	0.0810609	0.199488	0.155828	0.365601	0.527136	0.30552	0.463176	0.0148673	0.447128	0.484092	0.0542736	0.118544	0.0729535
276921	cg08159412	4						0.00665383	0.00665383	1.62282	1.62282	Apple up vs Pear	0.292988	10.1255	0.321908	0.445087	1	0.286085	0.689211	0.705802	0.752871	0.77907	0	0.67955	0.775088	0.79006	0.790746	0.744311	?	0.760485	0.744299	0.791379	0.402617	0.765073
529290	cg15974300	21					1	0.00668191	0.00668191	1.61096	1.61096	Apple up vs Pear	0.298307	9.8875	0.366416	0.555878	1	0.803897	0.302867	0.757315	0.828266	0.78944	0.825238	0.121604	0.785635	0.806511	0.781572	0.806187	0.784726	0.769189	0.779182	0.762332	0.327254	0.252208
816131	cg26069044	11	NRGN	Body	N_Shore		50	0.00672912	0.00672912	1.8163	1.8163	Apple up vs Pear	0.27287	9.86586	0.306592	0.466141	1	0.0439529	0.459938	0.725985	0.489778	0.483596	0.457043	0.423301	0.466269	0.756571	0.755028	0.711174	0.44272	0.468069	0.418024	0.796958	0.0219263	0.491045
486913	cg14615128	7	GRID2IP	Body	N_Shore		0	0.00675161	0.00675161	0.593851	-1.68392	Apple down vs Pear	-0.323863	9.85561	0.43189	0.657325	1	0.795103	0.861507	0.459021	0.510024	0.452396	0.753162	0.786544	0.0179137	0.0637137	0.763358	0.484709	0.726679	0.755394	0.443316	0.785528	0.780757	0.878053
211276	cg06193597	2					4	0.00675681	0.00675681	0.323123	-3.09479	Apple down vs Pear	-0.451528	9.85325	0.839494	1.278	1	0.903557	0.721218	0.898499	0.0756511	0.0738593	0.0940929	0.903056	0.0841257	0.0743123	0.0760807	0.0721828	0.604396	0.0541486	0.0858271	0.660788	0.700846	0.74236
104794	cg03020684	15	THSD4	Body			48	0.00680692	0.00680692	0.682377	-1.46547	Apple down vs Pear	-0.232395	9.83058	0.222384	0.339325	1	0.827037	0.47855	0.4598	0.454691	0.467612	0.842454	0.849424	0.458138	0.473399	0.454713	0.465668	0.837836	0.838198	0.451917	0.468607	0.437019	0.849366
448648	cg13528314	4	CD38	Body			2	0.0069153	0.0069153	1.83775	1.83775	Apple up vs Pear	0.273729	9.78218	0.308525	0.473093	1	0.67074	0.0951457	0.70727	0.668749	0.672293	0.567196	0.521007	0.67741	0.634662	0.573851	0.603316	0.125682	0.643222	0.375807	0.448152	0.172844	0.134595
159227	cg04636193	6	LRRC16A	Body			0	0.00709553	0.00709553	1.75678	1.75678	Apple up vs Pear	0.374224	9.70359	0.576651	0.891399	1	0.528036	0.0358759	0.895364	0.899852	0.886721	0.917795	0.920223	0.586887	0.915789	0.895165	0.900033	0.568443	0.887308	0.914309	0.905741	0.0208554	0.470218
758100	cg23996696	21					27	0.00719017	0.00719017	0.403433	-2.47873	Apple down vs Pear	-0.341377	9.66324	0.479863	0.74488	1	0.193127	0.71285	0.296431	0	0.0260288	0.71757	0.678241	0.0754375	0.257601	0.722148	0.106728	0.647977	0.297445	0.214402	0.312364	0.798886	0.256998
722071	cg22718636	4	DGKQ	Body	Island	Unclassified_Cell_type_specific	4	0.00721751	0.00721751	1.496	1.496	Apple up vs Pear	0.213452	9.65169	0.187608	0.291567	1	0.341547	0.72897	0.5801	0.636953	0.650253	0.404355	0.64102	0.707988	0.738133	0.493341	0.652908	0.4243	0.625664	0.784078	0.568609	0.171229	0.301031
409452	cg12280242	4			S_Shelf		1	0.00733726	0.00733726	1.64482	1.64482	Apple up vs Pear	0.329717	9.60171	0.447644	0.69932	1	0.835286	0	0.795782	0.829574	0.834084	0.835325	0.829672	0.868975	0.835409	0.84687	0.804875	0.398466	0.86408	0.826692	0.90415	0.188221	0.492351
248820	cg07308158	2	CNNM3	Body			0	0.00740397	0.00740397	2.2721	2.2721	Apple up vs Pear	0.423754	9.57426	0.739394	1.15841	1	0.480203	0.0289954	0.836057	0.43916	0.824498	0.903122	0.808057	0.490344	0.721295	0.822527	0.839438	0.0466658	0.876808	0.849832	0.868715	0.024722	0.0400317
88969	cg02564175	16				Promoter_Associated	49	0.00742694	0.00742694	3.45804	3.45804	Apple up vs Pear	0.26025	9.56488	0.278889	0.437364	1	0.0170045	0.0202275	0.462982	0.474962	0.364198	0.377584	0.0396694	0.0915543	0.0866524	0.477351	0.529597	0.0158603	0.460919	0.584807	0.128248	0.193978	0.0768156
489169	cg14683065	10	LRRC27	Body	S_Shelf		42	0.00752056	0.00752056	0.389187	-2.56946	Apple down vs Pear	-0.387321	9.52697	0.617718	0.972583	1	0.667257	0.280162	0.640867	0.0138813	0.0228349	0.599601	0.699692	0.0284867	0.644065	0.0245111	0.0976494	0.748225	0.0450339	0.221742	0.728789	0.692025	0.751785
798341	cg25420101	5	WDR41	Body	N_Shelf		1	0.00764973	0.00764973	2.06334	2.06334	Apple up vs Pear	0.297243	9.47555	0.363809	0.575918	1	0.291708	0.251902	0.257643	0.272074	0.849276	0.231293	0.194291	0.820084	0.532928	0.306318	0.782646	0.527843	0.575477	0.807131	0.564222	0.22959	0.230128
563214	cg17033622	11	FLI1	Body	S_Shelf		2	0.00775211	0.00775211	1.61558	1.61558	Apple up vs Pear	0.312731	9.4355	0.402708	0.640202	1	0.684788	0.090255	0.704947	0.77265	0.803534	0.662756	0.640139	0.814731	0.879516	0.829641	0.840372	0	0.843715	0.879622	0.838871	0.782852	0.695413
117512	cg03398919	2					35	0.00776146	0.00776146	0.492176	-2.03179	Apple down vs Pear	-0.410632	9.43187	0.694311	1.1042	1	0.834092	0.752405	0.802681	0.796335	0.117294	0.852633	0.818052	0.184242	0.75364	0.154813	0.094196	0.828718	0.171362	0.849372	0.0558531	0.7831	0.791274
663687	cg20566384	19	MED16	Body	S_Shore		0	0.00777637	0.00777637	0.549968	-1.81829	Apple down vs Pear	-0.388368	9.42609	0.621064	0.988316	1	0.842918	0.853633	0.0678733	0.838644	0.852644	0.846151	0.88193	0.490394	0.449592	0.0532587	0.883319	0.883067	0.0369352	0.56063	0.51282	0.863754	0.8694
629017	cg19311470	4	RPL9	TSS1500	Island	Promoter_Associated	0	0.0078201	0.0078201	4.4875	4.4875	Apple up vs Pear	0.396972	9.40923	0.648886	1.03444	1	0.517128	0.0491811	0.970916	0.481755	0.537948	0.049357	0.0608006	0.964903	0.512595	0.512877	0.0550291	0.0366069	0.519905	0.0453712	0.506689	0.0283487	0.0553674
609063	cg18580559	8					0	0.00793115	0.00793115	0.545521	-1.83311	Apple down vs Pear	-0.270635	9.36688	0.301589	0.482961	1	0.401551	0.706174	0.044905	0.649966	0.394354	0.657761	0.426089	0.394266	0.432439	0.0409134	0.408048	0.677919	0.424349	0.41249	0.0467551	0.658198	0.64069
189083	cg05519532	9					13	0.00801157	0.00801157	1.82327	1.82327	Apple up vs Pear	0.32794	9.33664	0.442832	0.711443	1	0.807881	0.0216279	0.719476	0.800819	0.849553	0.462448	0.599558	0.82996	0.414635	0.808277	0.794385	0.00990822	0.506862	0.69747	0.841338	0.445789	0.441149
487377	cg14629612	21	HLCS	Body			2	0.00814424	0.00814424	2.03193	2.03193	Apple up vs Pear	0.435079	9.4885	0.745344	1.09973	1	0	0.893259	0.831833	0.878533	0.870666	0.86036	0.0449081	0.827388	0.85922	0.866269	0.859664	0.862005	0.86196	0.854741	?	0.235673	0.0551233
865830	rs133860							0.00847519	0.00847519	3.43572	3.43572	Apple up vs Pear	0.379715	9.1688	0.593696	0.971276	1	0.502107	0.0132547	0.94963	0.00747286	0.954856	0.0222818	0.494982	0.48815	0.531821	0.510554	0.483829	0.0223228	0.468308	0.484991	0.47648	0.00875076	0.0275618
7611	cg00212031	Y	TTTY14	TSS200	Island			0.00853698	0.00853698	2.93747	2.93747	Apple up vs Pear	0.278347	9.14723	0.319023	0.523148	1	0.0716499	0.249993	0.551208	0.414411	0.289191	0.101519	0	0.661749	0.472758	0.526646	0.470575	0	0.192431	0.506796	0.134358	0.582497	0
711075	cg22309983	17	TRPV1	TSS1500			49	0.00872733	0.00872733	1.6927	1.6927	Apple up vs Pear	0.322603	9.08188	0.428535	0.707785	1	0.702489	0.0361719	0.658718	0.755041	0.843852	0.779935	0.820537	0.875472	0.859802	0.755504	0.829435	0.444946	0.764739	0.848676	0.691966	0.448295	0.0276467
100259	cg02891956	3	RBMS3	Body			39	0.00887819	0.00887819	0.746844	-1.33897	Apple down vs Pear	-0.202281	9.03124	0.168484	0.279836	1	0.820589	0.799991	0.849325	0.658418	0.553094	0.768402	0.855019	0.529555	0.20715	0.563972	0.71498	0.788246	0.647134	0.680232	0.56371	0.887836	0.673186
596568	cg18137779	1					47	0.00890888	0.00890888	0.699899	-1.42878	Apple down vs Pear	-0.273787	9.02106	0.308657	0.513227	1	0.915647	0.912983	0.892473	0.9249	0.508711	0.914048	0.894993	0.48756	0.916943	0.491796	0.90382	0.908552	0.508434	0.397395	0.353257	0.939563	0.900428
332546	cg09863391	17					49	0.0090645	0.0090645	0.611045	-1.63654	Apple down vs Pear	-0.219042	8.97004	0.197563	0.330371	1	0.372347	0.594442	0.37023	0.392122	0.0282157	0.581284	0.579281	0.401981	0.387162	0.606324	0.410574	0.558862	0.393425	0.038734	0.412372	0.663183	0.592695
725919	cg22857670	14			N_Shelf		0	0.00924908	0.00924908	1.5751	1.5751	Apple up vs Pear	0.245422	8.91081	0.248013	0.417493	1	0.466492	0.471361	0.767904	0.497064	0.753955	0.60677	0.369408	0.844947	0.726928	0.513212	0.668819	0.622428	0.741219	0.415853	0.791787	0.0390747	0.411694
865853	rs3936238							0.0094433	0.0094433	0.428665	-2.33283	Apple down vs Pear	-0.429579	8.84994	0.759863	1.28791	1	0.477398	0.952758	0.0532735	0.486476	0.0497321	0.960933	0.466149	0.522474	0.953091	0.0555326	0.497333	0.466552	0.476784	0.0694958	0.0588754	0.967801	0.971609
247220	cg07258983	18			N_Shelf		0	0.00961832	0.00961832	1.53463	1.53463	Apple up vs Pear	0.303706	8.79631	0.379801	0.64766	1	0.543354	0.0451018	0.8739	0.907319	0.541976	0.913405	0.491713	0.917471	0.923147	0.893363	0.910678	0.507231	0.919654	0.933843	0.896378	0.559456	0.916207
658231	cg20364183	3	LSAMP	Body			0	0.00973451	0.00973451	0.655597	-1.52533	Apple down vs Pear	-0.28557	8.76131	0.335794	0.574904	1	0.795128	0.812599	0.782515	0.420969	0.410334	0.772777	0.839842	0.0769722	0.436696	0.809328	0.81237	0.84932	0.431911	0.430005	0.824927	0.882218	0.852322
836271	cg26757229	11	BIRC3	5'UTR	S_Shelf		44	0.00986016	0.00986016	0.611667	-1.63488	Apple down vs Pear	-0.348124	8.724	0.499018	0.85801	1	0.862437	0.917608	0.865523	0.886083	0.562362	0.89252	0.915789	0.562455	0.0535334	0.52402	0.0254409	0.874686	0.552745	0.554441	0.896732	0.90735	0.90481
845682	cg27076160	10	ZNF365	3'UTR			33	0.0099449	0.0099449	1.84984	1.84984	Apple up vs Pear	0.316567	8.69915	0.412649	0.711534	1	0.48502	0.0327689	0.712306	0.727456	0.75654	0.732313	0.738842	0.471729	0.461972	0.731699	0.745852	0.0524864	0.751853	0.723756	0.807513	0.0935941	0.472478
865857	rs5926356							0.00996323	0.00996323	0.449734	-2.22354	Apple down vs Pear	-0.418675	8.6938	0.721777	1.24533	1	0.483196	0.95984	0.490467	0.43286	0.456705	0.475931	0.47442	0.458761	0.0494478	0.964261	0.0411953	0.983719	0.0352413	0.460656	0.0322441	0.974974	0.973931
242595	cg07124183	5					0	0.0100387	0.0100387	1.66789	1.66789	Apple up vs Pear	0.313452	8.67193	0.404568	0.699789	1	0.769657	0.798055	0.755388	0.762805	0.802096	0.792094	0.0359797	0.801248	0.809645	0.775466	0.757374	0.0196797	0.763183	0.800261	0.80025	0.415826	0.453943
826516	cg26422465	1	WDR8	Body	Island		0	0.0100742	0.0100742	0.509944	-1.961	Apple down vs Pear	-0.302287	8.6617	0.37626	0.651593	1	0.374793	0.73839	0.0576102	0.0523656	0.0467023	0.624322	0.685135	0.632445	0.402939	0.431818	0.051749	0.447262	0.634269	0.418553	0.417098	0.718941	0.72905
156504	cg04554949	22					4	0.010252	0.010252	1.43128	1.43128	Apple up vs Pear	0.214773	8.61108	0.189937	0.330859	1	0.41357	0.563721	0.523348	0.462678	0.889124	0.540985	0.530619	0.894604	0.578183	0.550254	0.867365	0.520851	0.868914	0.912585	0.580597	0.45848	0.457717
653912	cg20205188	10	ADARB2	Body	N_Shore		34	0.0105728	0.0105728	0.549823	-1.81877	Apple down vs Pear	-0.237548	8.52222	0.232356	0.40897	1	0.57794	0.504366	0.282511	0.318243	0.299739	0.268565	0.528379	0.061805	0.338199	0.541693	0.05992	0.613912	0.59283	0.348696	0.0576539	0.60282	0.59776
443121	cg13370086	1	TTC22	Body			50	0.0106876	0.0106876	0.759897	-1.31597	Apple down vs Pear	-0.217619	8.4912	0.195003	0.34448	1	0.914351	0.912531	0.912268	0.588658	0.920789	0.897868	0.901313	0.542745	0.54816	0.525715	0.546768	0.917756	0.911655	0.480473	0.910142	0.913643	0.88703
689993	cg21524061	4	TLR6	3'UTR			1	0.0108099	0.0108099	1.56383	1.56383	Apple up vs Pear	0.288755	8.45855	0.343326	0.608839	1	0.839396	0.463327	0.831166	0.856502	0.821841	0.877542	0.448056	0.835108	0.838909	0.470347	0.832761	0.483683	0.840503	0.819767	0.861955	0.0291783	0.443736
382736	cg11431762	19	HMG20B	TSS1500	N_Shore		34	0.0108492	0.0108492	0.548502	-1.82315	Apple down vs Pear	-0.221601	8.44813	0.202205	0.359024	1	0.355785	0.625265	0.346865	0.332555	0.0377952	0.48241	0.369147	0.41516	0.385052	0.0264312	0.34704	0.344355	0.368481	0.397317	0.0354172	0.672712	0.586012
417224	cg12531767	X	TAZ	Body	S_Shelf		16	0.010966	0.010966	0.300806	-3.3244	Apple down vs Pear	-0.348498	8.41747	0.500093	0.89117	1	0.103233	0.788833	0.0969432	0.0726853	0.0947207	0.0964487	0.618136	0.183692	0.0604782	0.0313685	0	0.530909	0.0510761	0.725887	0.182452	0.749075	0.602366
469840	cg14133106	Y			S_Shelf			0.0110466	0.0110466	7.10334	7.10334	Apple up vs Pear	0.240195	8.56472	0.21635	0.353649	1	0	0.181578	0.00815183	0	0.332801	0	0	0.372271	0.167437	0.544999	0.413043	0.0498057	0.516308	0.208257	0.232223	0.00474441	?
170902	cg04982228	6	GPLD1	Body			2	0.011447	0.011447	11.171	11.171	Apple up vs Pear	0.301366	8.29502	0.373971	0.676257	1	0.0265148	0.035879	0.0487117	0.452748	0.0302625	0.0338438	0.0382902	0.491778	0.475877	0.0358272	0.483636	0.0261922	0.447853	0.811329	0.0319396	0.0239989	0.0226914
456446	cg13749548	14			N_Shelf		28	0.0116127	0.0116127	0.359225	-2.78377	Apple down vs Pear	-0.478607	8.61125	0.855174	1.29101	1	0.025488	0.922442	0.518684	0.508185	0.566777	0.537697	0.961507	0.526704	?	0.00276215	0.0164832	0.914065	0	?	0.00689765	0.964737	0.902491
33966	cg00958775	2					0	0.0117348	0.0117348	0.437862	-2.28382	Apple down vs Pear	-0.305915	8.22457	0.385347	0.702797	1	0.169935	0.439357	0.149908	0.390048	0.469342	0.187432	0.664444	0.120582	0.0970455	0.148634	0.17524	0.828129	0.116282	0.532435	0.183333	0.730764	0.789341
313727	cg09281805	7	FOXK1	Body			0	0.0118496	0.0118496	2.10739	2.10739	Apple up vs Pear	0.269998	8.19702	0.300172	0.549294	1	0.0591492	0.062632	0.626652	0.0505639	0.651795	0.367243	0.445249	0.719667	0.384916	0.646659	0.433684	0.395497	0.631914	0.404968	0.587306	0.324104	0.0528295
769247	cg24394819	17	RPTOR	Body			22	0.0119826	0.0119826	1.5366	1.5366	Apple up vs Pear	0.214984	8.16546	0.19031	0.3496	1	0.66898	0.433455	0.754644	0.662271	0.614161	0.540537	0.321049	0.842935	0.728453	0.508462	0.439877	0.154532	0.652865	0.412946	0.539649	0.284332	0.401613
475446	cg14289956	6	PPARD	5'UTR			1	0.0120532	0.0120532	1.5093	1.5093	Apple up vs Pear	0.261002	8.14889	0.280503	0.516334	1	0.803132	0.470962	0.805528	0.488336	0.808798	0.825051	0.49994	0.805637	0.800651	0.779787	0.800746	0.473139	0.812115	0.816051	0.81709	0.491409	0.0236671
21405	cg00597225	2					37	0.0122978	0.0122978	1.64697	1.64697	Apple up vs Pear	0.286336	8.09229	0.337598	0.625777	1	0.105795	0.577074	0.947141	0.5884	0.920243	0.563221	0.599183	0.629877	0.584891	0.93353	0.568	0.615927	0.592159	0.931216	0.593708	0.0795646	0.557303
359073	cg10678429	5					0	0.012308	0.012308	1.72238	1.72238	Apple up vs Pear	0.256671	8.08995	0.271272	0.502979	1	0.064701	0.526605	0.788293	0.556086	0.846702	0.486423	0.472113	0.850293	0.500405	0.527643	0.513742	0.450708	0.521595	0.492351	0.522749	0	0.486651
298424	cg08817483	17			Island			0.0123332	0.0123332	0.372988	-2.68105	Apple down vs Pear	-0.243536	8.0842	0.244217	0.453138	1	0.130254	0.143746	0.0969509	0.10747	0.10497	0.58134	0.118991	0.140106	0.120128	0.11273	0.103526	0.569933	0.449309	0.108297	0.105224	0.603233	0.571354
67345	cg01933473	1	EXOSC10	Body			1	0.0123388	0.0123388	0.511309	-1.95576	Apple down vs Pear	-0.395776	8.08291	0.644981	1.19694	1	0.80785	0.810848	0.161126	0.810764	0.124181	0.800439	0.837206	0.053881	0.121416	0.813929	0.827222	0.779922	0	0.827808	0.400611	0.838217	0.794605
415317	cg12471283	5					4	0.012555	0.012555	1.51312	1.51312	Apple up vs Pear	0.258214	8.03413	0.274543	0.512581	1	0.533282	0.51869	0.778728	0.571997	0.889282	0.528172	0.53566	0.834293	0.79657	0.888071	0.569604	0.555681	0.866233	0.547831	0.87182	0.821944	0.0291713
561951	cg16995742	2	COPS8	TSS1500	N_Shore		14	0.012566	0.012566	2.37133	2.37133	Apple up vs Pear	0.370975	8.03167	0.56668	1.05833	1	0.02806	0.0644668	0.889294	0.566872	0.891965	0.600279	0.552269	0.56102	0.876091	0.553605	0.571385	0.0604718	0.549118	0.0629955	0.892618	0.0557025	0.532402
321908	cg09531751	10	ADAM12	Body			0	0.0125912	0.0125912	1.52875	1.52875	Apple up vs Pear	0.265328	8.02606	0.289878	0.541757	1	0.732654	0.533512	0.622868	0.764757	0.769026	0.60133	0.579635	0.773205	0.897329	0.899037	0.293534	0.168604	0.771371	0.948171	0.931993	0.535907	0.360966
158553	cg04613734	8	TRPS1	5'UTR	S_Shelf		25	0.0126608	0.0126608	0.655988	-1.52442	Apple down vs Pear	-0.271935	8.01062	0.304495	0.570171	1	0.541214	0.915089	0.546381	0.539445	0.504338	0.91869	0.919144	0.491083	0.498336	0.576222	0.543958	0.879772	0.889236	0.550044	0.0464275	0.851734	0.507734
129271	cg03741892	2					51	0.0128421	0.0128421	0.583603	-1.71349	Apple down vs Pear	-0.270268	7.97084	0.300773	0.566013	1	0.621859	0.625261	0.143609	0.558289	0.638094	0.536923	0.699723	0.65558	0.306545	0.138369	0.669303	0.704499	0.436619	0.241543	0	0.66345	0.691728
789414	cg25099095	6			S_Shelf		29	0.0129567	0.0129567	3.52906	3.52906	Apple up vs Pear	0.436583	7.94601	0.784843	1.48158	1	0.0405362	0.518036	0.476732	0.0422544	0.923137	0.0311296	0.513315	0.908223	0.906962	0.907408	0.503016	0.0378188	0.0420347	0.46636	0.915969	0.0327991	0.0347504
796063	cg25341939	14				Unclassified_Cell_type_specific	0	0.0129672	0.0129672	1.40453	1.40453	Apple up vs Pear	0.214685	7.94376	0.189781	0.358358	1	0.720605	0.522116	0.671748	0.747168	0.769321	0.693331	0.746244	0.782572	0.793091	0.746768	0.758108	0.513779	0.71883	0.744904	0.72142	0.0464125	0.472468
381053	cg11379315	4	MEPE	5'UTR			1	0.013207	0.013207	0.642179	-1.5572	Apple down vs Pear	-0.295286	7.89269	0.359033	0.682339	1	0.846828	0.856255	0.888244	0.859497	0.568627	0.86835	0.589013	0.0996492	0.520768	0.546348	0.54403	0.892393	0.100253	0.593324	0.578733	0.841463	0.882329
560620	cg16950711	5					44	0.0132406	0.0132406	1.58471	1.58471	Apple up vs Pear	0.270404	7.88561	0.301074	0.572703	1	0.779443	0.0618745	0.705932	0.805853	0.770323	0.749193	0.67507	0.689507	0.678592	0.740738	0.715253	0.405958	0.760834	0.70555	0.756011	0.508536	0.0571159
229781	cg06754542	8	PVT1	Body			37	0.0137008	0.0137008	1.82762	1.82762	Apple up vs Pear	0.403082	7.7908	0.669016	1.28809	1	0.925758	0.0496755	0.89956	0.627147	0.924736	0.929007	0.927881	0.921669	0.922303	0.928663	0.928805	0.0331745	0.926277	0.908723	0.913289	0.00879632	0.534954
309947	cg09167828	2	C2orf50	3'UTR			47	0.0137355	0.0137355	1.71327	1.71327	Apple up vs Pear	0.347924	7.7838	0.498446	0.960546	1	0.88261	0.0138005	0.859301	0.561625	0.857261	0.876135	0.834987	0.874636	0.883724	0.822341	0.879508	0.395995	0.868537	0.87268	0.877495	0.370677	0.0403016
613109	cg18727946	8					6	0.0138602	0.0138602	1.71429	1.71429	Apple up vs Pear	0.334462	7.75879	0.460619	0.890511	1	0.777473	0.76384	0.862094	0.88262	0.707125	0.843167	0.348605	0.862631	0.870051	0.950475	0.838956	0.031338	0.848454	0.793205	0.411471	0.439169	0.0741316
388631	cg11627968	7	HIPK2	Body			0	0.0139294	0.0139294	1.43382	1.43382	Apple up vs Pear	0.273585	7.74503	0.308201	0.5969	1	0.921277	0.0556381	0.896482	0.90963	0.910865	0.902282	0.906035	0.890155	0.907933	0.923396	0.913546	0.50535	0.895764	0.900275	0.894165	0.616915	0.506955
534706	cg16145187	17					48	0.0142027	0.0142027	2.14883	2.14883	Apple up vs Pear	0.340896	7.69147	0.478513	0.933201	1	0.0372025	0.0265527	0.743906	0.741302	0.459309	0.490262	0.497341	0.804446	0.766586	0.454069	0.755304	0.0511234	0.779615	0.84152	0.0302379	0.540614	0.434038
508571	cg15308688	22					42	0.0143698	0.0143698	1.60072	1.60072	Apple up vs Pear	0.308222	7.65928	0.39118	0.766091	1	0.318568	0.858596	0.842891	0.923221	0.840733	0.847166	0.808441	0.858881	0.521068	0.86692	0.806677	0.418663	0.83977	0.862553	0.850409	0	0.340198
727231	cg22901480	12	NOS1	5'UTR			0	0.0144707	0.0144707	7.01258	7.01258	Apple up vs Pear	0.274905	7.64006	0.311183	0.610956	1	0.0405359	0.059433	0.433709	0.513839	0.484806	0.0510604	0.0461472	0.0396205	0.73951	0.0367284	0.42835	0.0462829	0.463398	0.0552426	0.0110683	0.0269083	0.0496846
808818	cg25794455	5					0	0.0145638	0.0145638	1.54444	1.54444	Apple up vs Pear	0.265163	7.62246	0.289518	0.569734	1	0.442851	0.096078	0.75433	0.758208	0.742152	0.761808	0.761778	0.741128	0.753893	0.740893	0.743626	0.459948	0.739895	0.808903	0.739037	0.800774	0.0860652
616890	cg18857647	11	CREB3L1	Body	S_Shelf		18	0.0148134	0.0148134	2.56565	2.56565	Apple up vs Pear	0.302749	7.57591	0.37741	0.747257	1	0	0.053946	0.647253	0.54285	0.617622	0.496596	0	0	0.531663	0.631018	0.498452	0.121143	0.665943	0.163637	0.662739	0.481976	0.199922
294314	cg08691316	3					1	0.014946	0.014946	1.55536	1.55536	Apple up vs Pear	0.23045	7.55154	0.218676	0.434367	1	0.654968	0.687007	0.574651	0.697459	0.671431	0.123436	0.556003	0.632928	0.623341	0.655495	0.60451	0.590452	0.736569	0.612172	0.645482	0.110282	0.182531
28725	cg00807008	2	CLASP1	Body			19	0.0152609	0.0152609	1.45778	1.45778	Apple up vs Pear	0.273053	7.49466	0.307003	0.614444	1	0.556283	0.615105	0.898828	0.895946	0.944005	0.906278	0.907474	0.902938	0.57433	0.883247	0.894059	0.549672	0.932347	0.885834	0.883743	0.0335212	0.606989
585403	cg17749961	2	LCLAT1	TSS1500	N_Shore	Promoter_Associated	17	0.0154672	0.0154672	8.08379	8.08379	Apple up vs Pear	0.235451	7.45813	0.22827	0.459103	1	0.022929	0.0381074	0.0157637	0.0311472	0.036277	0.0213305	0.0544416	0.366792	0.422195	0.0603081	0.365354	0.0364718	0.387684	0.306453	0.694911	0.0106252	0.0487601
102562	cg02956194	6			S_Shelf		1	0.0155067	0.0155067	0.549749	-1.81901	Apple down vs Pear	-0.350054	7.45119	0.504568	1.01575	1	0.877254	0.872245	0.487887	0.0664508	0.0492919	0.89194	0.879492	0.478299	0.035106	0.874105	0.492377	0.500814	0.458204	0.47398	0.858408	0.534652	0.885857
157822	cg04592386	19	SLC7A9	Body			1	0.0157111	0.0157111	1.60876	1.60876	Apple up vs Pear	0.265405	7.41564	0.290046	0.586692	1	0.104852	0.737982	0.659209	0.740529	0.722554	0.677519	0.676272	0.750839	0.65483	0.711369	0.655055	0.630951	0.706476	0.639145	0.773801	0.145461	0.0787926
43189	cg01221582	14	BRF1	Body			50	0.0160381	0.0160381	1.44894	1.44894	Apple up vs Pear	0.249422	7.35986	0.256164	0.522083	1	0.783678	0.0213944	0.794205	0.794188	0.796292	0.828189	0.832968	0.771787	0.856645	0.814427	0.807551	0.432192	0.799779	0.827672	0.787465	0.54976	0.440873
420155	cg12624040	2	B3GALT1	5'UTR			46	0.0163216	0.0163216	0.68585	-1.45804	Apple down vs Pear	-0.227133	7.31256	0.212427	0.435745	1	0.78376	0.729809	0.422329	0.490763	0.48803	0.491817	0.69115	0.442078	0.696976	0.741	0.425218	0.710878	0.487007	0.711449	0.0539127	0.821964	0.83169
586828	cg17799599	17	PRKCA	Body			34	0.0164061	0.0164061	1.56809	1.56809	Apple up vs Pear	0.242604	7.29864	0.24235	0.498073	1	0.632407	0.501431	0.689876	0.728364	0.619556	0.580426	0.743662	0.839968	0.741027	0.624216	0.669942	0.00715177	0.66312	0.679665	0.440778	0.241749	0.282507
709227	cg22237495	1			S_Shelf		46	0.0165374	0.0165374	1.46254	1.46254	Apple up vs Pear	0.275422	7.27717	0.312354	0.643836	1	0.899543	0.0184591	0.871456	0.584135	0.904894	0.574379	0.936479	0.916241	0.910597	0.885011	0.904086	0.553975	0.908163	0.920401	0.903831	0.650655	0.534727
644672	cg19866026	14	PPP2R5E	Body		Unclassified_Cell_type_specific	0	0.016824	0.016824	1.7527	1.7527	Apple up vs Pear	0.359321	7.231	0.531637	1.10283	1	0.826207	0.751326	0.854401	0.864756	0.889824	0.792435	0.895082	0.856323	0.874357	0.834082	0.843748	0	0.81442	0.774974	0.760108	0.0765947	0
147264	cg04277055	4			S_Shelf		0	0.0170067	0.0170067	1.96156	1.96156	Apple up vs Pear	0.407238	7.20202	0.682882	1.42227	1	0.192738	0.886887	0.867826	0.894641	0.364496	0.893834	0.896596	0.904197	0.839151	0.89298	0.881745	0.0734428	0.874721	0.87435	0.913449	0	0.0211251
724845	cg22819120	15	THSD4	TSS1500			1	0.0174937	0.0174937	1.43972	1.43972	Apple up vs Pear	0.27003	7.12653	0.300244	0.631957	1	0.83009	0.873928	0.893419	0.876306	0.888875	0.881899	0.757904	0.883195	0.903718	0.881895	0.842087	0	0.903956	0.896868	0.871002	0.414688	0.540205
555715	cg16788050	11			Island		40	0.0175924	0.0175924	1.58208	1.58208	Apple up vs Pear	0.270103	7.11153	0.300406	0.633632	1	0.810319	0.851667	0.783552	0.796538	0.779302	0.203831	0.51026	0.80156	0.822826	0.767961	0.518437	0.203159	0.799767	0.76361	0.507832	0.151259	0.51775
399184	cg11951968	6					2	0.0179383	0.0179383	1.5578	1.5578	Apple up vs Pear	0.313657	7.05969	0.405098	0.860727	1	0.879243	0.0986047	0.894934	0.851708	0.880804	0.825256	0.874501	0.904712	0.889353	0.86891	0.868624	0.134094	0.882699	0.823765	0.894221	0.253953	0.870558
657539	cg20337029	15	PCSK6	Body			34	0.0181884	0.0181884	2.04339	2.04339	Apple up vs Pear	0.202494	7.02293	0.168839	0.360617	1	0.41288	0.032531	0.455836	0.449416	0.280821	0.321192	0.0365012	0.286132	0.531394	0.492987	0.388331	0.0339553	0.500037	0.0470253	0.533686	0.262276	0.259173
817390	cg26111679	8	PTK2B	5'UTR			27	0.0182338	0.0182338	2.63443	2.63443	Apple up vs Pear	0.254886	7.01632	0.267511	0.571905	1	0.0666455	0.40756	0.0615191	0.383316	0.399748	0.402556	0.0598013	0.378084	0.0681695	0.385939	0.623981	0.0621061	0.596111	0.61048	0.600992	0.0461904	0.0467762
119222	cg03448017	16					0	0.0184591	0.0184591	1.83416	1.83416	Apple up vs Pear	0.321502	6.98379	0.425616	0.91415	1	0.741016	0.437555	0.717768	0.479543	0.760535	0.665024	0.795576	0.832819	0.769148	0.746945	0.795183	0.0309995	0.720261	0.4841	0.762917	0.0062934	0.0214737
460698	cg13874759	17	ENPP7	TSS1500		Unclassified_Cell_type_specific	1	0.0185373	0.0185373	1.3899	1.3899	Apple up vs Pear	0.273114	7.23715	0.268528	0.482354	1	0.989763	0.973599	0.958031	0.966471	0.978522	0.392655	0.452624	?	0.974419	0.979713	0.980313	?	0.973356	0.981777	0.969674	0.98639	0.407804
347068	cg10307207	6					35	0.0185736	0.0185736	0.379153	-2.63746	Apple down vs Pear	-0.301274	6.96743	0.373743	0.804622	1	0.53202	0.837727	0.494524	0.556661	0.102144	0.00300445	0.53972	0.0698447	0.038267	0.080722	0.404228	0.384276	0.0577811	0.00279727	0.03292	0.642361	0.457733
49067	cg01394772	20					0	0.0186189	0.0186189	1.44912	1.44912	Apple up vs Pear	0.236368	6.96099	0.230053	0.495733	1	0.470301	0.0483955	0.781209	0.82169	0.803948	0.768919	0.746442	0.809058	0.797528	0.781153	0.47284	0.749574	0.79818	0.777104	0.783884	0.462147	0.438259
149716	cg04350215	1	ABCA4	Body			2	0.0186217	0.0186217	0.609231	-1.64141	Apple down vs Pear	-0.289089	6.9606	0.344123	0.74158	1	0.748445	0.783163	0.753355	0.0439548	0.415348	0.788469	0.757596	0.427336	0.0516316	0.764613	0.431533	0.443875	0.406135	0.78567	0.427492	0.85931	0.797715
99720	cg02877261	4			N_Shelf		46	0.0191907	0.0191907	0.493002	-2.02839	Apple down vs Pear	-0.214644	6.88123	0.189709	0.413535	1	0.298277	0.350971	0.303943	0.0341874	0.0417917	0.307288	0.340975	0.0378103	0.363064	0.0347346	0.044228	0.543742	0.360404	0.525822	0.341203	0.584168	0.53812
76923	cg02215595	9	GNAQ	Body			0	0.0193914	0.0193914	0.583433	-1.71399	Apple down vs Pear	-0.333524	6.85389	0.458041	1.00244	1	0.901165	0.661014	0.491686	0.0804456	0.48554	0.92785	0.570379	0.595219	0.923386	0.872413	0.0487127	0.850693	0.610526	0.0658493	0.497481	0.845189	0.848261
215603	cg06330797	6	RPS6KA2	Body	N_Shore		40	0.0194222	0.0194222	1.67454	1.67454	Apple up vs Pear	0.318277	6.84972	0.417119	0.913437	1	0.511354	0.494189	0.814245	0.491733	0.88651	0.864513	0.0435427	0.875529	0.496651	0.866555	0.863389	0.859914	0.867193	0.86686	0.872539	0.0247296	0.504662
4687	cg00126498	6	ULBP1	Body	S_Shore		40	0.0195404	0.0195404	0.688102	-1.45327	Apple down vs Pear	-0.20023	6.83378	0.165085	0.362359	1	0.357245	0.898498	0.424452	0.548559	0.40363	0.331576	0.68183	0.405215	0.404657	0.324223	0.57491	0.839639	0.448386	0.502202	0.381202	0.788919	0.59611
4585	cg00123214	1	RWDD3	Body	S_Shelf		0	0.0196373	0.0196373	1.53204	1.53204	Apple up vs Pear	0.237545	6.82082	0.232348	0.510969	1	0.802606	0.458269	0.78383	0.770966	0.747807	0.467142	0.467786	0.827736	0.801261	0.461338	0.777888	0.0424952	0.750033	0.474319	0.445092	0.436686	0.450392
810799	cg25872828	18	LOC101060542	TSS1500			0	0.0196664	0.0196664	0.431939	-2.31514	Apple down vs Pear	-0.359257	6.81693	0.531448	1.1694	1	0.533642	0.928156	0.0423244	0.508257	0.0469541	0.554963	0.560967	0.493033	0.06663	0.508223	0.032276	0.912233	0.485683	0.0345488	0.51377	0.0184842	0.918545
309311	cg09148704	6	TULP4	Body			1	0.0196942	0.0196942	0.426824	-2.34289	Apple down vs Pear	-0.307608	6.81323	0.389622	0.857792	1	0.234707	0.722129	0.167414	0.757615	0.227108	0.034419	0.575221	0.170546	0.0660647	0.222784	0.210959	0.680991	0.0186082	0.184729	0.26482	0.782664	0.726578
817883	cg26128147	9	IARS	Body			40	0.0198746	0.0198746	1.41042	1.41042	Apple up vs Pear	0.254388	6.78935	0.266466	0.588714	1	0.869945	0.344751	0.837078	0.887049	0.893853	0.862373	0.867294	0.881677	0.839602	0.871837	0.895892	0.23228	0.887794	0.850142	0.897185	0.874547	0.287571
354295	cg10528826	7	PTPRN2	Body	S_Shelf		1	0.0199873	0.0199873	1.53655	1.53655	Apple up vs Pear	0.295203	6.77456	0.358831	0.794511	1	0.809474	0.826275	0.812705	0.824477	0.880398	0.894687	0.829775	0.825089	0.845076	0.841107	0.84483	0.186653	0.865452	0.848268	0.86646	0.12708	0.177342
459469	cg13837834	5						0.0201041	0.0201041	1.80303	1.80303	Apple up vs Pear	0.270185	6.75933	0.300588	0.667051	1	0.562085	0.11141	0.590782	0.629615	0.688248	0.635493	0.613128	0.706223	0.677541	0.701805	0.701106	0.133682	0.565103	0.122152	0.683836	0.0954997	0.203897
171468	cg04998327	11					0	0.0203722	0.0203722	0.599143	-1.66905	Apple down vs Pear	-0.331812	6.72477	0.453351	1.01123	1	0.879091	0.869315	0.445968	0.474385	0.853355	0.880023	0.880216	0.0313925	0.455847	0.0308901	0.886557	0.484295	0.453006	0.443325	0.884719	0.90542	0.895939
43620	cg01234697	8					47	0.0207757	0.0207757	0.583551	-1.71365	Apple down vs Pear	-0.213378	6.67372	0.187476	0.421376	1	0.283028	0.735749	0.149096	0.579183	0.545972	0.46598	0.472353	0.198397	0.218586	0.151938	0.218729	0.745028	0.344897	0.250156	0.333004	0.581673	0.302804
274969	cg08101922	7			N_Shelf		13	0.0208068	0.0208068	1.59104	1.59104	Apple up vs Pear	0.225616	6.66983	0.209598	0.471371	1	0.419698	0.461527	0.424106	0.674966	0.651383	0.705916	0.462677	0.705978	0.422524	0.694955	0.663512	0.0627394	0.43267	0.685566	0.717737	0.486805	0.0727066
186795	cg05450204	18					0	0.0209299	0.0209299	1.39961	1.39961	Apple up vs Pear	0.250967	6.65451	0.259347	0.584596	1	0.883719	0.511055	0.850327	0.899771	0.909095	0.884381	0.524644	0.909791	0.811185	0.864415	0.880177	0.911406	0.891487	0.868369	0.905384	0.635992	0.0450366
501505	cg15074403	7	EGFR	Body			29	0.0209934	0.0209934	0.300499	-3.32779	Apple down vs Pear	-0.2686	6.64665	0.297071	0.670422	1	0.029738	0.713548	0.0319987	0.397227	0.0347041	0.0357105	0.428795	0.444047	0.0408486	0.0366169	0.0609885	0.391518	0.0445473	0.0314639	0.0314383	0.428513	0.66009
516784	cg15579027	5	SLC25A48	Body	N_Shore		42	0.0210304	0.0210304	1.76119	1.76119	Apple up vs Pear	0.326542	6.64208	0.439064	0.991551	1	0.164674	0.949324	0.546125	0.96775	0.965634	0.595354	0.326524	0.386147	0.616537	0.582485	0.959954	0.571885	0.971517	0.584324	0.974831	0.215734	0.179422
380616	cg11366142	8	AZIN1-AS1	Body			37	0.0211658	0.0211658	3.83164	3.83164	Apple up vs Pear	0.28715	6.62544	0.33952	0.768674	1	0.0584679	0.0429297	0.453196	0.0465678	0.049192	0.0301595	0.0460526	0.852207	0.495289	0.488586	0.488715	0.467475	0.053911	0.46474	0.493167	0.0201861	0.0445818
831315	cg26584456	10	PPIF	3'UTR		Gene_Associated_Cell_type_specific	47	0.0212705	0.0212705	2.20798	2.20798	Apple up vs Pear	0.325378	6.61266	0.435939	0.988874	1	0.0228986	0.0649163	0.566788	0.574082	0.895944	0.588078	0.54893	0.943419	0.585877	0.561971	0.0538346	0.0584363	0.590709	0.592092	0.582633	0.0248249	0.577413
756553	cg23943944	5					40	0.0212922	0.0212922	1.84515	1.84515	Apple up vs Pear	0.277393	6.61002	0.31684	0.718999	1	0.44228	0.044381	0.706792	0.458516	0.77781	0.726026	0.597247	0.620991	0.408009	0.739495	0.441874	0.0310354	0.453965	0.644444	0.804192	0.424509	0.0320342
285296	cg08415053	5					0	0.0214022	0.0214022	0.29035	-3.44411	Apple down vs Pear	-0.400557	6.59668	0.66066	1.50226	1	0	0.76648	0.781043	0.00181079	0.0269049	0.0458492	0.518181	0.0452732	0.467541	0.0255572	0.0624678	0.862602	0.0686636	0.0886674	0.070935	0.878984	0.879007
133735	cg03878285	17	PITPNC1	Body		Unclassified	1	0.0214259	0.0214259	1.59578	1.59578	Apple up vs Pear	0.218037	6.59382	0.195753	0.44531	1	0.429307	0.45939	0.43407	0.713052	0.756925	0.411849	0.34735	0.826738	0.687535	0.411768	0.42649	0.421849	0.420271	0.389746	0.773458	0.01729	0.474745
656009	cg20282533	12	TXNRD1	Body			1	0.0217132	0.0217132	1.68215	1.68215	Apple up vs Pear	0.259328	6.5594	0.276916	0.633249	1	0.439254	0.311392	0.793317	0.375687	0.789908	0.823125	0.1424	0.544168	0.861995	0.485717	0.375414	0.489619	0.836207	0.619418	0.713073	0.20101	0.254337
469304	cg14117320	11	PLEKHA7	Body	N_Shelf		2	0.0217428	0.0217428	0.487429	-2.05158	Apple down vs Pear	-0.344625	6.55588	0.489038	1.11893	1	0.79307	0.739713	0.736982	0.212859	0.118236	0.214482	0.66198	0	0.297844	0.269673	0.760917	0.724248	0.75992	0	0.120779	0.800871	0.772057
180854	cg05273049	10	ARHGAP22	Body			46	0.0218516	0.0218516	0.231154	-4.32612	Apple down vs Pear	-0.337358	6.543	0.46863	1.07435	1	0.0577345	0.0618808	0.0617578	0.0394867	0.0430762	0.0471738	0.584001	0.0573269	0.0353078	0.076734	0.041011	0.848677	0.0408033	0.560992	0.0577722	0.609974	0.86205
548087	cg16556401	3	MB21D2	Body		Unclassified	1	0.0218747	0.0218747	0.668402	-1.49611	Apple down vs Pear	-0.215336	6.54029	0.190933	0.4379	1	0.580228	0.580184	0.336075	0.415555	0.477213	0.25743	0.584188	0.455363	0.377205	0.399152	0.449425	0.611026	0.430353	0.644865	0.355317	0.950995	0.981665
210327	cg06164346	16	GFOD2	Body			1	0.0219526	0.0219526	2.11685	2.11685	Apple up vs Pear	0.2055	6.53112	0.17389	0.399373	1	0.610265	0.0394635	0.316882	0.366722	0.344081	0.276789	0.0257962	0.524836	0.30084	0.590116	0.489722	0.0302677	0.356154	0.308958	0.29669	0.288749	0.0166671
714978	cg22460601	8	USP17L1	TSS1500			49	0.0220243	0.0220243	1.62782	1.62782	Apple up vs Pear	0.251077	6.52272	0.259574	0.596931	1	0.626195	0.590448	0.615922	0.610485	0.520895	0.675201	0.682541	0.63696	0.678442	0.681973	0.671755	0.0550636	0.669258	0.654948	0.769315	0.0860745	0.083908
373056	cg11128983	5	CPLX2	TSS1500	N_Shore		40	0.0222963	0.0222963	0.598688	-1.67032	Apple down vs Pear	-0.315474	6.49113	0.409804	0.946994	1	0.808227	0.749458	0.132307	0.795111	0.153609	0.815112	0.74227	0.2493	0.724119	0.146317	0.766366	0.70557	0.159817	0.771976	0.807395	0.879221	0.802883
304184	cg08986950	5	ERAP1	Body			8	0.0224167	0.0224167	0.285544	-3.50208	Apple down vs Pear	-0.351127	6.47729	0.507667	1.17565	1	0.48939	0.880413	0.051025	0.0250244	0.0266115	0.0336847	0.567371	0.0398219	0.0250757	0.0552534	0.0508474	0.915078	0.557568	0.0351577	0.536956	0.0297314	0.524562
27181	cg00762003	21	AGPAT3	Body	Island		1	0.0225577	0.0225577	1.53076	1.53076	Apple up vs Pear	0.265206	6.46119	0.289611	0.672346	1	0.784939	0.145061	0.763528	0.768747	0.75047	0.771711	0.732164	0.760558	0.782495	0.77808	0.790894	0.775072	0.743267	0.743842	0.766874	0.201482	0.0872617
855536	cg27415324	22			S_Shelf		18	0.0228079	0.0228079	1.6853	1.6853	Apple up vs Pear	0.277311	6.43292	0.316653	0.738357	1	0.685773	0.0306908	0.658542	0.524539	0.740334	0.70269	0.645558	0.720691	0.661613	0.709734	0.681442	0.68141	0.717576	0.678352	0.726839	0.0379781	0.0484854
740958	cg23390607	11					50	0.0235605	0.0235605	1.60887	1.60887	Apple up vs Pear	0.21267	6.34996	0.186235	0.439928	1	0.389231	0.10569	0.58708	0.521436	0.601479	0.347934	0.672898	0.630824	0.554665	0.734422	0.401017	0.298606	0.632857	0.366472	0.58931	0.0314865	0.599158
692268	cg21603812	9					1	0.0236923	0.0236923	0.49757	-2.00977	Apple down vs Pear	-0.228727	6.33574	0.21542	0.51001	1	0.458634	0.561873	0.28263	0.490342	0.0270791	0.39735	0.482098	0.604091	0.00486746	0.244309	0.113869	0.362592	0	0.459855	0.0381086	0.579121	0.345029
121837	cg03525852	8					44	0.0237179	0.0237179	1.54254	1.54254	Apple up vs Pear	0.234492	6.33299	0.226415	0.536274	1	0.706366	0.622032	0.679421	0.667972	0.664272	0	0.651426	0.622712	0.584013	0.697884	0.688746	0.540382	0.68409	0.665475	0.712448	0.477614	0.0276614
16194	cg00456343	10			Island		1	0.023803	0.023803	0.634858	-1.57515	Apple down vs Pear	-0.238256	6.32388	0.233742	0.554429	1	0.577798	0.697509	0.147509	0.611644	0.118469	0.67774	0.661475	0.609688	0.630945	0.10671	0.64683	0.596399	0.577771	0.539116	0.153792	0.674556	0.68205
847652	cg27141807	3	SPSB4	Body	S_Shore		27	0.0239207	0.0239207	1.96127	1.96127	Apple up vs Pear	0.310726	6.31133	0.397561	0.944876	1	0.685948	0.0238857	0.697715	0.508376	0.788209	0.752537	0.688232	0.770401	0.748342	0.50025	0.547656	0.0633078	0.511411	0.484844	0.782525	0.0196714	0.0291459
97863	cg02822944	8	DNAJC5B	5'UTR		Unclassified_Cell_type_specific	0	0.0240449	0.0240449	1.60423	1.60423	Apple up vs Pear	0.310463	6.29817	0.396888	0.945247	1	0.817543	0.501653	0.854761	0.504459	0.875352	0.860018	0.900639	0.874128	0.874792	0.843562	0.868057	0.038767	0.855294	0.833085	0.859294	0.0254114	0.452678
309587	cg09157251	11	SHANK2	Body			11	0.024077	0.024077	0.492966	-2.02854	Apple down vs Pear	-0.326107	6.29478	0.437894	1.04347	1	0.779414	0.797039	0.165123	0.777699	0.185844	0.225508	0.811137	0.197754	0.798028	0.168307	0.199295	0.272048	0.312281	0.0506962	0.315561	0.832457	0.784559
28440	cg00797779	17	EXOC7	Body	N_Shelf		40	0.0241135	0.0241135	1.42062	1.42062	Apple up vs Pear	0.21158	6.29093	0.18433	0.439515	1	0.641741	0.0641669	0.670806	0.450016	0.71276	0.722525	0.45956	0.757503	0.792581	0.700591	0.792045	0.434976	0.755208	0.749591	0.764934	0.776677	0.421522
188939	cg05515244	16	CDH5	5'UTR			1	0.0243934	0.0243934	1.94174	1.94174	Apple up vs Pear	0.352423	6.26165	0.511421	1.22513	1	0.14998	0.785249	0.777114	0.122446	0.838916	0.784951	0.718554	0.849408	0.811671	0.802432	0.744468	0.0824737	0.793487	0.797407	0.729143	0.0948661	0.00350895
865863	rs6626309							0.0245336	0.0245336	2.52784	2.52784	Apple up vs Pear	0.321657	6.24713	0.426024	1.02293	1	0.00556987	0.0113821	0.00145543	0.460383	0.510172	0.44251	0.024498	0.966067	0.500926	0.499971	0.950009	0.513339	0.510459	0.445469	0.476962	0.0186509	0.457764
318698	cg09433738	3	SPSB4	Body		Unclassified_Cell_type_specific	33	0.0246624	0.0246624	0.326575	-3.06208	Apple down vs Pear	-0.22903	6.23387	0.21599	0.519717	1	0.0793251	0.399581	0.087469	0.38988	0.0944699	0.102622	0.0547264	0.0997806	0.0692161	0.0696697	0.0713396	0.410921	0.0764726	0.0638798	0.0884964	0.620658	0.712847
245247	cg07199764	1					44	0.0246989	0.0246989	0.639373	-1.56403	Apple down vs Pear	-0.210592	6.23013	0.182614	0.43967	1	0.6075	0.586839	0.306717	0.1619	0.614642	0.409229	0.552137	0.340369	0.548657	0.606277	0.301268	0.607291	0.623107	0.121824	0.108927	0.678448	0.646283
283141	cg08346443	7					0	0.0247591	0.0247591	1.32663	1.32663	Apple up vs Pear	0.205652	6.22397	0.174147	0.419702	1	0.89097	0.611639	0.826568	0.881202	0.912596	0.694301	0.878754	0.888969	0.460669	0.84494	0.862213	0.498104	0.87658	0.899461	0.899603	0.33081	0.502815
523715	cg15798563	19			S_Shelf		0	0.025099	0.025099	0.71639	-1.39589	Apple down vs Pear	-0.204885	6.18953	0.17285	0.418893	1	0.755206	0.703283	0.549166	0.690307	0.55971	0.650642	0.605669	0.274022	0.710095	0.676156	0.70465	0.796686	0.568389	0.322108	0.120727	0.791142	0.754296
642552	cg19793163	10					0	0.0252199	0.0252199	1.47211	1.47211	Apple up vs Pear	0.230628	6.1774	0.219015	0.531812	1	0.497519	0.50115	0.831262	0.858853	0.566446	0.531131	0.035448	0.860162	0.807103	0.574853	0.865946	0.816706	0.549247	0.788993	0.488457	0.482845	0.554732
507827	cg15281606	2	UBE2F	Body			0	0.0255729	0.0255729	9.27405	9.27405	Apple up vs Pear	0.22297	6.14239	0.204711	0.499913	1	0.0384534	0.0446369	0.022028	0.457558	0.0244282	0.0208537	0.0292897	0.472631	0.452846	0.494571	0.03661	0.0191132	0.487323	0.0204028	0.0307793	0.0104469	0.0258429
477698	cg14354870	14	MEG8	Body			1	0.0255752	0.0255752	1.43816	1.43816	Apple up vs Pear	0.236082	6.14216	0.229496	0.560461	1	0.680926	0.753557	0.792012	0.82874	0.772094	0.708649	0.770625	0.850414	0.789177	0.746037	0.76711	0.654332	0.751941	0.745859	0.70549	0.105627	0.0979208
744506	cg23517115	5	LOC255167	TSS1500	N_Shore		3	0.0257379	0.0257379	1.62361	1.62361	Apple up vs Pear	0.288501	6.12621	0.342724	0.839158	1	0.758207	0.77703	0.740997	0.765604	0.767978	0.0825855	0.743558	0.753734	0.77325	0.71657	0.764454	0.0774337	0.731215	0.767743	0.729752	0.767028	0.0325579
646663	cg19935756	4	GABRB1	Body	N_Shelf		36	0.026243	0.026243	2.21345	2.21345	Apple up vs Pear	0.242264	6.07743	0.241673	0.596484	1	0.581615	0.0509897	0.309171	0.0431623	0.373106	0.0347001	0.039233	0.53172	0.453474	0.55927	0.572677	0.286199	0.644087	0.311063	0.62141	0.371809	0.0330015
475003	cg14278666	7	DGKI	Body			15	0.0263524	0.0263524	1.53115	1.53115	Apple up vs Pear	0.29151	6.06701	0.349909	0.86511	1	0.773072	0	0.816559	0.828378	0.83542	0.824867	0.863272	0.884757	0.847298	0.826625	0.836549	0.117188	0.851766	0.84902	0.827031	0.89166	0.371757
112815	cg03258421	2			S_Shore		0	0.0264914	0.0264914	1.43585	1.43585	Apple up vs Pear	0.2758	6.05384	0.313212	0.776067	1	0.954153	0.471518	0.929711	0.491594	0.954822	0.954113	0.964148	0.957512	0.945498	0.95702	0.960587	0.311813	0.95514	0.965406	0.96856	0.29885	0.474897
504821	cg15178138	4	SORCS2	Body			27	0.026879	0.026879	1.58048	1.58048	Apple up vs Pear	0.326603	6.01753	0.439228	1.09487	1	0.883947	0.0272686	0.874796	0.862058	0.892737	0.914546	0.0568848	0.89791	0.913001	0.895124	0.889945	0.866631	0.880039	0.900308	0.886546	0.93305	0.256176
491432	cg14756466	8	TRPS1	Body	S_Shore		0	0.0270314	0.0270314	1.52282	1.52282	Apple up vs Pear	0.278396	6.00342	0.319135	0.797383	1	0.815042	0.415084	0.785441	0.825092	0.751945	0.830623	0.775044	0.842853	0.819739	0.777512	0.861822	0.026696	0.834847	0.859735	0.749897	0.0688839	0.796075
365962	cg10900271	7					1	0.0270784	0.0270784	0.635402	-1.57381	Apple down vs Pear	-0.290189	5.99909	0.346745	0.866994	1	0.771208	0.779256	0.716294	0.174187	0.313031	0.819376	0.755358	0.77353	0.256112	0.812461	0.18782	0.78608	0.154539	0.810665	0.858617	0.835751	0.824371
26085	cg00730761	6	ASCC3	Body		Unclassified_Cell_type_specific	1	0.0277524	0.0277524	2.12657	2.12657	Apple up vs Pear	0.235438	5.93789	0.228245	0.57658	1	0.423948	0.458195	0.443462	0.444766	0.702387	0.0331374	0.0539643	0.0323325	0.441899	0.415036	0.429739	0.437033	0.438505	0.684159	0.411953	0.0262675	0.0303592
418400	cg12569880	18			S_Shore		33	0.0283499	0.0283499	1.38525	1.38525	Apple up vs Pear	0.21128	5.88507	0.183809	0.468498	1	0.176329	0.346375	0.757515	0.772183	0.792175	0.753738	0.750235	0.764838	0.704908	0.74443	0.770716	0.246435	0.775549	0.745895	0.768904	0.780711	0.785191
339397	cg10075506	2	MYT1L	Body			7	0.028482	0.028482	0.716545	-1.39558	Apple down vs Pear	-0.228584	5.87356	0.21515	0.549453	1	0.87348	0.576549	0.262574	0.535074	0.516956	0.83813	0.613718	0.63852	0.317804	0.855574	0.387477	0.871674	0.781777	0.865897	0.616729	0.953119	0.918284
570481	cg17265515	8	ERICH1	Body			1	0.0285085	0.0285085	0.677692	-1.4756	Apple down vs Pear	-0.232164	5.87127	0.221941	0.567018	1	0.792311	0.824434	0.72978	0.56736	0.50043	0.357144	0.765364	0.266135	0.264912	0.500332	0.148277	0.748418	0.749007	0.724234	0.431061	0.737561	0.816982
78230	cg02253420	19	ZNF790	1stExon	N_Shore	Promoter_Associated	1	0.0287261	0.0287261	0.264503	-3.78068	Apple down vs Pear	-0.237326	5.85247	0.23192	0.594417	1	0.085179	0.106972	0.0850271	0.0812747	0.085668	0.077177	0.107807	0.0885681	0.0850563	0.0636414	0.0984741	0.891577	0.0980518	0.0950286	0.0726911	0.516429	0.473577
862110	cg27639199	15	TMC3	TSS200			40	0.0287358	0.0287358	0.506967	-1.97252	Apple down vs Pear	-0.307678	5.85163	0.389801	0.999212	1	0.0312318	0.830363	0.0590976	0.480035	0.0604533	0.511978	0.507754	0.0604206	0.0448306	0.488048	0.495851	0.81557	0.511063	0.485187	0.478754	0.817622	0.853847
865849	rs2804694							0.0287375	0.0287375	2.8438	2.8438	Apple up vs Pear	0.397085	5.85149	0.649256	1.66433	1	0.0198325	0.0226394	0.458211	0.937163	0.931473	0.487017	0.481415	0.938681	0.472663	0.460752	0.940042	0.466841	0.0217914	0.945766	0.0179281	0.0109418	0.018849
390369	cg11680857	1	LCE2D	TSS1500			1	0.029685	0.029685	1.39863	1.39863	Apple up vs Pear	0.229638	5.77155	0.217138	0.564332	1	0.835052	0.511995	0.793736	0.583737	0.807379	0.845314	0.510475	0.834643	0.77748	0.836122	0.853384	0.771394	0.863206	0.84709	0.86032	0.0149217	0.54335
500655	cg15048554	12	BTBD11	TSS1500	Island	Promoter_Associated	0	0.0297658	0.0297658	0.230238	-4.34334	Apple down vs Pear	-0.205049	6.2254	0.135838	0.240019	1	0.0462889	?	0.0657086	0.090581	?	0.412666	0.45144	0.00727539	0.172461	?	0.00390476	0.496008	?	0.0291949	0.0601883	0.0478604	0.144013
99575	cg02873093	8	ADCY8	Body			46	0.0298702	0.0298702	1.5479	1.5479	Apple up vs Pear	0.249997	5.75628	0.257347	0.670609	1	0.0934302	0.671851	0.685583	0.724588	0.735857	0.718623	0.665643	0.648389	0.676664	0.700923	0.686494	0.117263	0.767685	0.66588	0.770711	0.816378	0.110771
336832	cg09998151	14	AKAP6	Body			48	0.0300514	0.0300514	2.62183	2.62183	Apple up vs Pear	0.243224	5.74143	0.243592	0.636406	1	0.0411447	0.0342926	0.049018	0.361731	0.369779	0.505709	0.346219	0.662443	0.361721	0.599531	0.0516843	0.0426458	0.356346	0.540146	0.579534	0.040955	0.0388157
392270	cg11738485	19	HOOK2	Body	Island	Unclassified_Cell_type_specific	0	0.0304323	0.0304323	2.733	2.733	Apple up vs Pear	0.341808	5.71057	0.481076	1.26365	1	0.626792	0.0329027	0.631154	0.62773	0.682967	0.026807	0.0367356	0.620537	0.937239	0.609301	0.611576	0.629248	0.616539	0.0326874	0.0206924	0.00981991	0.0183358
176989	cg05160251	2					47	0.0307143	0.0307143	0.636605	-1.57083	Apple down vs Pear	-0.276243	5.68801	0.314219	0.828635	1	0.750197	0.736154	0.316421	0.781604	0.679861	0.659774	0.828803	0.775241	0.139176	0.778006	0.447462	0.751031	0	0.208501	0.713029	0.773571	0.821682
846049	cg27088421	8	PPP3CC	3'UTR			1	0.0310156	0.0310156	1.44621	1.44621	Apple up vs Pear	0.242751	5.66417	0.242645	0.64258	1	0.0940067	0.784882	0.772076	0.858108	0.761729	0.796223	0.846455	0.835806	0.792519	0.748021	0.791674	0.771597	0.774858	0.763563	0.769421	0.265743	0.249275
725666	cg22849321	6					24	0.0310983	0.0310983	0.139255	-7.18108	Apple down vs Pear	-0.248376	5.65766	0.25402	0.673477	1	0.0700149	0.546213	0.0620232	0.0484922	0	0.029273	0.0258132	0.065091	0.00665452	0.0504204	0.0431052	0.0378116	0.0435547	0.0359124	0.0465795	0.863919	0.44687
218375	cg06417478	19	HOOK2	Body	N_Shore	Unclassified_Cell_type_specific		0.0316352	0.0316352	2.47217	2.47217	Apple up vs Pear	0.211058	5.61597	0.183423	0.489915	1	0.426183	0.0436583	0.430985	0.435597	0.419205	0.031499	0.0284353	0.384759	0.580101	0.386654	0.44998	0.409396	0.379488	0.0374911	0.0399756	0.0234081	0.0409781
409435	cg12279734	4	MORF4	TSS1500			0	0.0317265	0.0317265	0.700012	-1.42855	Apple down vs Pear	-0.21281	5.60895	0.18648	0.498702	1	0.767191	0.65747	0.647943	0.46566	0.775073	0.762354	0.629551	0.482799	0.40712	0.134704	0.703924	0.689513	0.758294	0.449093	0.141239	0.700907	0.758776
205985	cg06031234	14					0	0.0318363	0.0318363	0.520313	-1.92192	Apple down vs Pear	-0.379205	5.60056	0.592103	1.58583	1	0.869223	0.865635	0.88888	0.0547235	0.0859088	0.91884	0.911076	0.532678	0.563062	0.867426	0.0529178	0.497158	0.0514555	0.0809331	0.93522	0.962232	0.509513
86828	cg02502145	2	SOS1	Body			35	0.032131	0.032131	0.243558	-4.10581	Apple down vs Pear	-0.330129	5.57818	0.448763	1.20675	1	0.0635074	0.918745	0.0478476	0.581902	0.0540641	0.0386771	0.0329187	0.0555144	0.030803	0.060144	0.0541102	0.564883	0.0709689	0.0534751	0.0541138	0.926187	0.510049
403274	cg12080266	21	CLIC6	Body			30	0.0322146	0.0322146	1.4381	1.4381	Apple up vs Pear	0.253994	5.57188	0.265641	0.715131	1	0.926863	0.575728	0.883833	0.903841	0.897981	0.541119	0.0329243	0.911789	0.559253	0.909001	0.909145	0.551969	0.916497	0.536179	0.910052	0.554744	0.874996
848189	cg27160931	4	ZFYVE28	Body	S_Shelf		1	0.0322217	0.0322217	0.550546	-1.81638	Apple down vs Pear	-0.364476	5.57134	0.547	1.47271	1	0.840492	0.783555	0.753854	0.155048	0.160379	0.762821	0.798669	0	0.779114	0.8734	0.861187	0.78106	0	0.0294961	0.852065	0.872849	0.837067
18004	cg00504897	9	IARS	Body			27	0.0323388	0.0323388	1.4108	1.4108	Apple up vs Pear	0.230052	5.56255	0.217922	0.587649	1	0.79158	0.230718	0.798375	0.780294	0.804348	0.805195	0.803595	0.782333	0.824453	0.769008	0.785506	0.208269	0.793252	0.790698	0.772342	0.839725	0.24098
73838	cg02120552	2					35	0.0324946	0.0324946	0.526433	-1.89958	Apple down vs Pear	-0.264501	5.5509	0.288075	0.778455	1	0.713949	0.615684	0.498804	0.633588	0.052203	0.120522	0.42617	0.0536041	0.129089	0.450257	0.128038	0.539662	0.0587334	0.49745	0.43852	0.752506	0.74122
189912	cg05546557	5	PLEKHG4B	Body	N_Shore		0	0.0326493	0.0326493	1.57937	1.57937	Apple up vs Pear	0.206328	5.5394	0.175293	0.474672	1	0.530313	0.37212	0.54492	0.635607	0.552509	0.641728	0.624663	0.630848	0.601361	0.522206	0.620202	0.0257356	0.329985	0.615636	0.571236	0.253335	0.0449663
276090	cg08133365	1	LUZP1	5'UTR			1	0.0329715	0.0329715	1.4874	1.4874	Apple up vs Pear	0.279154	5.51565	0.320877	0.872636	1	0.503075	0.516638	0.929447	0.926102	0.917827	0.549904	0.937139	0.945261	0.532175	0.936407	0.943397	0.0206643	0.506782	0.940122	0.941409	0.525492	0.956258
165015	cg04810745	2				Unclassified_Cell_type_specific	1	0.0332352	0.0332352	0.344916	-2.89926	Apple down vs Pear	-0.231994	5.49641	0.221616	0.604801	1	0.195876	0.350866	0.13603	0.102747	0.323404	0.033426	0.0376949	0.165362	0.0342266	0.127576	0.0425995	0.4882	0.110074	0.0437971	0.135679	0.879335	0.493605
636900	cg19597178	2	SLC8A1	Body			20	0.0337927	0.0337927	0.652671	-1.53217	Apple down vs Pear	-0.248118	5.45632	0.253492	0.696878	1	0.547285	0.778269	0.187518	0.206574	0.396908	0.753356	0.642022	0.5874	0.122028	0.579295	0.83344	0.779709	0.257558	0.645563	0.846133	0.767293	0.732582
312863	cg09255886	1	LUZP1	5'UTR			32	0.0339845	0.0339845	1.5144	1.5144	Apple up vs Pear	0.261734	5.44269	0.282078	0.777404	1	0.460167	0.440405	0.847597	0.842123	0.850139	0.449575	0.861683	0.856978	0.441969	0.847365	0.850528	0.0595929	0.417874	0.866856	0.884099	0.408849	0.88146
631472	cg19405842	1	PRKCZ	5'UTR	Island		17	0.0340308	0.0340308	0.493579	-2.02602	Apple down vs Pear	-0.223625	5.43942	0.205916	0.567844	1	0.371346	0.586301	0.577334	0.575744	0.0415021	0.295367	0.398334	0.417233	0.0517469	0.0484911	0.0485637	0.332703	0.058255	0.0431622	0.31751	0.590873	0.516132
418535	cg12574596	22					42	0.0341113	0.0341113	1.48423	1.48423	Apple up vs Pear	0.203732	5.43374	0.17091	0.471802	1	0.579807	0.67292	0.603109	0.66411	0.691505	0.612237	0.639111	0.664791	0.673744	0.482598	0.692726	0.206111	0.452815	0.674235	0.645038	0.0972058	0.137755
404207	cg12109978	2					8	0.0342421	0.0342421	1.56416	1.56416	Apple up vs Pear	0.279481	5.42455	0.321628	0.889368	1	0.804813	0.802389	0.840997	0.536652	0.8308	0.0635437	0.83428	0.872254	0.764955	0.86034	0.823882	0.448829	0.500188	0.887133	0.831558	0.488648	0.0252603
426501	cg12833076	2					21	0.0342686	0.0342686	1.51714	1.51714	Apple up vs Pear	0.230181	5.42269	0.218167	0.603483	1	0.689664	0.198095	0.613327	0.708641	0.677328	0.726005	0.671937	0.638933	0.69848	0.663075	0.669623	0	0.715012	0.673028	0.695371	0.147244	0.682759
815172	cg26033510	6					0	0.0343481	0.0343481	0.641562	-1.55869	Apple down vs Pear	-0.257913	5.41712	0.273901	0.758432	1	0.859511	0.90753	0.811474	0.537583	0.039923	0.547988	0.515326	0.576319	0.512685	0.540892	0.54987	0.451314	0.519739	0.479671	0.0481819	0.876577	0.878578
722205	cg22723460	20					0	0.0345438	0.0345438	0.55305	-1.80815	Apple down vs Pear	-0.347817	5.40349	0.498138	1.38282	1	0.553562	0.907874	0.900396	0.536915	0.0447207	0.515952	0.785424	0.0497106	0.861289	0.492449	0.502387	0.820111	0.0377313	0.0377542	0.840488	0.945663	0.918821
445354	cg13435526	8	CCAR2	Body			1	0.0346909	0.0346909	1.42676	1.42676	Apple up vs Pear	0.209018	5.3933	0.179894	0.500327	1	0.736681	0.219639	0.715535	0.671985	0.703429	0.744638	0.692673	0.721076	0.687819	0.678114	0.691174	0.704876	0.69197	0.723365	0.703487	0.175031	0.154901
294838	cg08705587	8					0	0.0347247	0.0347247	1.69215	1.69215	Apple up vs Pear	0.327982	5.39097	0.442944	1.23246	1	0.888136	0.155476	0.830433	0.893202	0.257485	0.876164	0.882823	0.860485	0.865755	0.861686	0.880304	0.195461	0.847298	0.862236	0.859534	0.0513147	0.267646
377949	cg11282840	8					50	0.0350605	0.0350605	1.52085	1.52085	Apple up vs Pear	0.275862	5.36793	0.313352	0.875622	1	0.883067	0.465045	0.87968	0.427128	0.899374	0.909922	0.44265	0.923644	0.895629	0.898448	0.903208	0.0305865	0.893328	0.888275	0.446274	0.503806	0.472384
315081	cg09321367	2	LOC101927438	Body	N_Shore	Unclassified_Cell_type_specific	1	0.0352684	0.0352684	1.98651	1.98651	Apple up vs Pear	0.235903	5.35379	0.229148	0.642016	1	0.540769	0.00491183	0.52663	0.119789	0.528346	0.124721	0.520775	0.610458	0.580309	0.591819	0.53919	0	0.611589	0.546219	0.0959667	0.253148	0.229576
755738	cg23916408	22	TAB1	Body			31	0.035435	0.035435	0.372871	-2.68189	Apple down vs Pear	-0.27003	5.34253	0.300243	0.842981	1	0.775672	0.146204	0.230885	0.170779	0.0638443	0.834053	0.816385	0.0975693	0.100506	0.0627454	0.24811	0.281208	0.158086	0.234388	0.2386	0.160548	0
128318	cg03714923	16					1	0.0354587	0.0354587	1.4719	1.4719	Apple up vs Pear	0.267143	5.34093	0.293858	0.825301	1	0.841676	0.853306	0.807841	0.832027	0.82744	0.183787	0.878227	0.840351	0.843241	0.825361	0.823242	0.304192	0.836337	0.850041	0.846618	0.8549	0.0466575
533455	cg16104636	5	CTNND2	Body			28	0.035579	0.035579	0.764083	-1.30876	Apple down vs Pear	-0.20136	5.33284	0.166953	0.469598	1	0.861065	0.83649	0.437777	0.900905	0.452617	0.892436	0.777824	0.869127	0.831237	0.87124	0.437157	0.828203	0.464201	0.404462	0.852867	0.909564	0.869049
391019	cg11701583	12	NDUFA4L2	5'UTR	Island	Unclassified	14	0.0361052	0.0361052	0.176713	-5.6589	Apple down vs Pear	-0.247864	5.29784	0.252974	0.716257	1	0.0569706	0.0660613	0.0461492	0.0468024	0.0478368	0.0477336	0.0500615	0.0510821	0.057351	0.0594827	0.0606336	0.469939	0.0640035	0.0513518	0.0473299	0.946676	0.470023
370276	cg11037749	15	RAB27A	Body			47	0.0363304	0.0363304	1.34249	1.34249	Apple up vs Pear	0.2225	5.28304	0.203849	0.578784	1	0.866668	0.511883	0.886064	0.870306	0.897084	0.855449	0.553126	0.874555	0.870828	0.86386	0.88313	0.853165	0.852281	0.861583	0.861862	0.0406354	0.866658
551337	cg16655343	6	LOC285830	Body			22	0.0364498	0.0364498	0.580774	-1.72184	Apple down vs Pear	-0.236808	5.27524	0.23091	0.656587	1	0.378306	0.770313	0.0450227	0.0265435	0.406897	0.627946	0.367949	0.0510859	0.35639	0.364603	0.362798	0.37759	0.629652	0.649679	0.387952	0.696176	0.735813
222571	cg06545341	20	CDH4	Body			48	0.036679	0.036679	1.61404	1.61404	Apple up vs Pear	0.208043	5.26034	0.17822	0.508199	1	0.284841	0.200675	0.595046	0.622848	0.60863	0.578406	0.567039	0.683149	0.5768	0.526809	0.541198	0.553461	0.587633	0.137074	0.589369	0.033635	0.153629
363826	cg10831113	1					0	0.0367452	0.0367452	0.739533	-1.3522	Apple down vs Pear	-0.210058	5.25606	0.181689	0.518512	1	0.797446	0.785865	0.792375	0.779418	0.47867	0.803487	0.78371	0.0581325	0.817944	0.507365	0.505586	0.784567	0.486125	0.768664	0.76981	0.871164	0.81903
865845	rs2385226							0.0368539	0.0368539	3.49321	3.49321	Apple up vs Pear	0.310033	5.24904	0.395789	1.13103	1	0.389402	0.0172418	0.383395	0.398559	0.969358	0.0227697	0.398219	0.43008	0.0200419	0.382806	0.393648	0.0206316	0.968714	0.37858	0.0186508	0.00812315	0.0140676
602005	cg18330031	5	KCNN2	Body			10	0.0369101	0.0369101	0.425416	-2.35064	Apple down vs Pear	-0.338623	5.24543	0.472153	1.35018	1	0	0.72421	0.00360125	0.815877	0.0874763	0.116674	0.790573	0	0.316028	0.121107	0.440195	0.775704	0.14787	0.294963	0.28001	0.867969	0.850223
336728	cg09994822	17					0	0.0372977	0.0372977	1.60677	1.60677	Apple up vs Pear	0.206599	5.22067	0.175755	0.504977	1	0.481179	0.147033	0.481028	0.533048	0.540529	0.160416	0.45405	0.785417	0.449471	0.481365	0.719756	0.470671	0.159623	0.512824	0.807823	0.509787	0.160287
211533	cg06201514	2	MYT1L	Body			5	0.0375122	0.0375122	0.662978	-1.50835	Apple down vs Pear	-0.232064	5.20709	0.221751	0.638796	1	0.772697	0.412911	0.125108	0.438819	0.406375	0.712526	0.502968	0.474269	0.209746	0.723365	0.19811	0.807632	0.671339	0.788724	0.529225	0.857952	0.75332
424474	cg12765935	12	METAP2	Body			0	0.0375525	0.0375525	1.37013	1.37013	Apple up vs Pear	0.222621	5.20455	0.204071	0.588152	1	0.831038	0.445864	0.833088	0.816896	0.825803	0.843801	0.850412	0.842237	0.866396	0.803078	0.803863	0.781826	0.810552	0.823033	0.816011	0.032823	0.424559
558056	cg16866567	8	PLEKHA2	5'UTR	Island	Promoter_Associated	35	0.0375529	0.0375529	3.22942	3.22942	Apple up vs Pear	0.256144	5.20452	0.270158	0.778624	1	0.0543678	0.0508202	0.539118	0.0800928	0.0762396	0.490737	0.0464191	0.700528	0.558073	0.543176	0.0766056	0.0623234	0.521697	0.0592325	0.555602	0.0476889	0.0518916
652614	cg20154216	11	UBTFL1	TSS1500			36	0.0377582	0.0377582	1.54976	1.54976	Apple up vs Pear	0.2934	5.19163	0.354462	1.02414	1	0.837185	0	0.827491	0.800864	0.900005	0.344994	0.840069	0.821367	0.766472	0.880351	0.738009	0	0.855356	0.823696	0.85723	0.887896	0.825643
468890	cg14104700	13			N_Shelf		31	0.037802	0.037802	0.658528	-1.51854	Apple down vs Pear	-0.259319	5.18889	0.276896	0.800449	1	0.777244	0.800453	0.653401	0.705143	0.106265	0.785226	0.798913	0.828718	0.819589	0.690392	0.126815	0.742989	0.212396	0.642219	0.216014	0.715623	0.695449
96745	cg02788935	10	DOCK1	Body			0	0.0383863	0.0383863	1.45437	1.45437	Apple up vs Pear	0.254124	5.15268	0.265914	0.774102	1	0.507564	0.512514	0.869856	0.853516	0.895335	0.896847	0.923948	0.907743	0.507642	0.899884	0.904654	0.0380697	0.898604	0.493713	0.903171	0.521259	0.514814
131310	cg03803585	11	SHANK2	Body			19	0.0384569	0.0384569	0.699382	-1.42983	Apple down vs Pear	-0.217377	5.14835	0.19457	0.566891	1	0.762563	0.806815	0.43776	0.444088	0.441863	0.782188	0.439436	0.0387099	0.7494	0.4385	0.466717	0.723291	0.448088	0.796308	0.795805	0.799412	0.748001
369353	cg11008123	11	LOC283267	TSS1500			48	0.0386864	0.0386864	0.559739	-1.78655	Apple down vs Pear	-0.315009	5.13434	0.408597	1.19372	1	0.887139	0.899344	0.347894	0.871342	0.343151	0.86442	0.283388	0.273571	0.894108	0.314701	0.306276	0.875627	0.345092	0.291495	0.0173377	0.918224	0.2804
12981	cg00366190	19	WDR88	TSS200	Island		46	0.0388965	0.0388965	0.593573	-1.68471	Apple down vs Pear	-0.336759	5.12159	0.466967	1.36764	1	0.925623	0.939015	0.356381	0.936738	0.2781	0.166797	0.909728	0.941687	0.903126	0.170816	0.360029	0.937652	0.232563	0.410056	0.32875	0.972616	0.948652
794766	cg25295696	7					0	0.0389482	0.0389482	1.37738	1.37738	Apple up vs Pear	0.233411	5.11847	0.224332	0.657421	1	0.84886	0.438827	0.853036	0.853746	0.844955	0.867583	0.868422	0.846609	0.868886	0.833892	0.845055	0.862835	0.84989	0.85341	0.869694	0.41072	0.032297
6594	cg00180644	4					42	0.038949	0.038949	2.72022	2.72022	Apple up vs Pear	0.325821	5.11842	0.437128	1.28104	1	0.769665	0	0.312281	0.0890355	0.79148	0	0.0421566	0.741391	0.700999	0	0.758904	0.327031	0.361009	0.65658	0.740601	0.161968	0.0250274
360942	cg10738648	12	ARPC3	TSS1500	S_Shore	Promoter_Associated	0	0.0390676	0.0390676	1.90533	1.90533	Apple up vs Pear	0.243733	5.11127	0.244611	0.717859	1	0.0445656	0.483486	0.486724	0.415783	0.294122	0.464704	0.789184	0.454806	0.510717	0.502863	0.53396	0.0387233	0.503512	0.665285	0.761763	0.0283848	0.0354984
601759	cg18321037	6			N_Shelf		0	0.0394667	0.0394667	1.74871	1.74871	Apple up vs Pear	0.255785	5.08739	0.269401	0.79432	1	0.232133	0.340816	0.821465	0.527739	0.475116	0.153689	0.84717	0.874248	0.334841	0.528093	0.530078	0.496017	0.462583	0.451967	0.968062	0.177578	0.144037
54475	cg01553548	4	FRAS1	Body			1	0.0400138	0.0400138	1.55868	1.55868	Apple up vs Pear	0.208059	5.05512	0.178248	0.528912	1	0.60054	0	0.560956	0.616381	0.593506	0.0657775	0.517426	0.537783	0.537508	0.55732	0.574472	0.125549	0.612211	0.588149	0.626462	0.65698	0.640634
555148	cg16769658	1	MAEL	Body			0	0.0401054	0.0401054	1.77567	1.77567	Apple up vs Pear	0.238838	5.04977	0.234886	0.697713	1	0.103775	0.125024	0.436486	0.480111	0.482507	0.144137	0.695928	0.50961	0.729772	0.717763	0.730612	0.498373	0.131697	0.53122	0.717743	0.0841324	0.504026
208410	cg06103394	16	PAQR4	TSS1500	Island	Promoter_Associated	40	0.0404537	0.0404537	0.269094	-3.71617	Apple down vs Pear	-0.311012	5.09769	0.362732	0.996187	1	0.0760806	0.908169	0.0261691	0.544082	0.0824149	0.085011	?	0.0851838	0.0967871	0.0537468	0	0.0914334	0.0560305	0.12701	0.0736159	0.855007	0.537397
673509	cg20929984	5					1	0.0406869	0.0406869	1.9439	1.9439	Apple up vs Pear	0.335793	5.01612	0.464294	1.38841	1	0.800939	0.137477	0.80912	0.843867	0.85186	0.383316	0.789368	0.934507	0.784706	0.308051	0.798515	0.0895617	0.777877	0	0.806921	0.199446	0.0901358
641569	cg19761267	5	RAI14	5'UTR			1	0.0407737	0.0407737	0.622216	-1.60716	Apple down vs Pear	-0.289088	5.01115	0.344119	1.03006	1	0.691154	0.753911	0.638475	0.679775	0	0.773729	0.738362	0.714181	0	0.744739	0.417571	0.840876	0.0574779	0.818901	0.690209	0.892103	0.666409
47840	cg01358620	14	HEATR5A	TSS200			27	0.0411956	0.0411956	0.606135	-1.6498	Apple down vs Pear	-0.271111	4.98714	0.302651	0.910294	1	0.810896	0.876462	0.497258	0.459861	0.115317	0.794452	0.10202	0.513842	0.494754	0.531983	0.162546	0.83791	0.794794	0.100875	0.50101	0.557093	0.83951
118684	cg03433448	6	DCDC2	Body			1	0.041294	0.041294	1.43315	1.43315	Apple up vs Pear	0.252682	4.98158	0.262904	0.791629	1	0.823078	0.339556	0.82285	0.810798	0.881496	0.889868	0.886287	0.863691	0.82675	0.782679	0.832917	0.0468283	0.844179	0.831806	0.863263	0.858284	0.239628
697233	cg21792760	2	ARPC2	Body			2	0.0413332	0.0413332	0.299421	-3.33978	Apple down vs Pear	-0.268797	5.04633	0.270944	0.751679	1	0	?	0	0.25531	0	0.110147	0.070337	0.112756	0.0579985	0.249963	0.0182821	0.733186	0.250268	0	0.204238	0.691099	0.697301
121953	cg03529658	3					33	0.0413768	0.0413768	0.713807	-1.40094	Apple down vs Pear	-0.203533	4.97692	0.170576	0.514103	1	0.628072	0.747019	0.662285	0.578453	0.709552	0.710252	0.73559	0.128914	0.54913	0.69854	0.130281	0.702989	0.560445	0.304872	0.753949	0.670273	0.784031
415601	cg12479705	4					44	0.0415205	0.0415205	0.544073	-1.83799	Apple down vs Pear	-0.300529	4.96884	0.371895	1.12268	1	0.2722	0.805898	0.716821	0.768026	0.245795	0.727941	0.629697	0.137922	0.25143	0.0261371	0.696253	0.67546	0	0.0523624	0.691562	0.78202	0.720901
827897	cg26469782	4			N_Shelf		32	0.0415251	0.0415251	1.8722	1.8722	Apple up vs Pear	0.230614	4.96859	0.218989	0.661119	1	0.460729	0.0792352	0.460832	0.509886	0.522323	0.518768	0.619046	0.0788187	0.655752	0.480098	0.501254	0.0740761	0.511991	0.475217	0.75401	0.0489016	0.050071
396226	cg11857805	14			S_Shelf		38	0.0415729	0.0415729	1.59327	1.59327	Apple up vs Pear	0.290833	4.96591	0.348287	1.05203	1	0.910833	0.0267296	0.882808	0.892779	0.514375	0.899339	0.509513	0.898876	0.895939	0.877329	0.534411	0.526416	0.528856	0.902419	0.882715	0.526826	0.031865
687696	cg21442528	12	LOC100292680	TSS1500			0	0.0420871	0.0420871	1.36529	1.36529	Apple up vs Pear	0.241544	4.93734	0.240237	0.729859	1	0.924946	0.476896	0.896039	0.905623	0.902835	0.915421	0.911962	0.922854	0.913686	0.911277	0.899426	0.472751	0.89407	0.89488	0.887123	0.0251829	0.901504
855110	cg27399895	1	GBP6	5'UTR			1	0.0421233	0.0421233	0.694372	-1.44015	Apple down vs Pear	-0.214037	4.93535	0.188637	0.573326	1	0.679596	0.747116	0.648474	0.649829	0.710644	0.6505	0.713209	0.179491	0.188594	0.685524	0.682201	0.714799	0.162285	0.698648	0.257131	0.721381	0.675635
619008	cg18938907	1	GSTM1	1stExon	Island	Unclassified_Cell_type_specific	0	0.042279	0.042279	2.86889	2.86889	Apple up vs Pear	0.240677	4.92678	0.238517	0.726183	1	0.0766487	0.486448	0.731384	0.0781955	0.0753759	0.0568566	0.0710847	0.0869529	0.439411	0.173053	0.454414	0.0809942	0.70984	0.416521	0.52943	0.058531	0.0709004
47553	cg01350803	7			N_Shore		39	0.0423471	0.0423471	0.489317	-2.04366	Apple down vs Pear	-0.270408	4.92305	0.301083	0.917369	1	0.562674	0.741924	0.0616105	0.432967	0.0791715	0.729485	0.0709001	0.66456	0.0623874	0.433161	0.0426115	0.467052	0.0710646	0.664377	0.0790334	0.57709	0.557389
570061	cg17251507	2	LOC100506457	Body			0	0.0427849	0.0427849	0.545439	-1.83339	Apple down vs Pear	-0.28645	4.89921	0.337867	1.03445	1	0.474704	0.844838	0.0169568	0.489532	0.0297281	0.849105	0.455374	0.50435	0.49929	0.484949	0.463869	0.460388	0.0424858	0.0450071	0.861011	0.882594	0.444168
22631	cg00631759	5	ADAMTS2	Body	N_Shore		0	0.0430409	0.0430409	1.67294	1.67294	Apple up vs Pear	0.308511	4.88541	0.391913	1.20332	1	0.183402	0.477886	0.164406	0.827137	0.848325	0.820618	0.801921	0.814042	0.810378	0.817851	0.851884	0.82747	0.822301	0.856296	0.857004	0.0390263	0.0588366
393897	cg11789991	5					37	0.0431017	0.0431017	0.714387	-1.3998	Apple down vs Pear	-0.216436	4.88214	0.192889	0.592635	1	0.846762	0.859574	0.542994	0.488908	0.548293	0.533723	0.855625	0.560545	0.0615172	0.537723	0.812661	0.870107	0.84195	0.553311	0.465664	0.873175	0.465576
505918	cg15216357	2	FAM228B	Body			1	0.0432077	0.0432077	0.314619	-3.17845	Apple down vs Pear	-0.280281	4.87646	0.323471	0.994997	1	0.167027	0.748676	0	0.0711831	0.703428	0.0251875	0.0805313	0.0596408	0.0438264	0.0872897	0.0137768	0.461273	0.00318615	0.114485	0.189792	0.755139	0.624756
865865	rs6991394							0.0433822	0.0433822	0.524459	-1.90673	Apple down vs Pear	-0.310956	4.86715	0.398149	1.22705	1	0.164705	0.953876	0.141483	0.948063	0.189274	0.488212	0.502523	0.473772	0.175508	0.530107	0.507273	0.951411	0.135068	0.16864	0.160241	0.973399	0.543164
237882	cg06983840	7	POR	Body			50	0.0434662	0.0434662	0.357558	-2.79675	Apple down vs Pear	-0.300035	4.86268	0.370675	1.14343	1	0.136642	0.725014	0.0802142	0.115891	0.0573079	0	0.136572	0.0614373	0.0925297	0.742519	0.180701	0.720805	0.101458	0.175418	0.0624057	0.792979	0.757153
208351	cg06101792	17	AATF	Body			1	0.0435479	0.0435479	0.582295	-1.71734	Apple down vs Pear	-0.315083	4.92248	0.390905	1.11177	1	0.867139	0.839037	0.240092	0.811073	0.177277	0.16282	0.839842	0.285959	0.355961	0.157072	?	0.842179	0.256804	0.84418	0.824711	0.874401	0.85482
838945	cg26848300	17	TRPV1	5'UTR			1	0.044281	0.044281	1.34887	1.34887	Apple up vs Pear	0.236674	4.81986	0.230648	0.717807	1	0.91396	0.173436	0.9024	0.907763	0.940179	0.913198	0.927066	0.899331	0.945164	0.911074	0.937766	0.842422	0.890885	0.920221	0.896034	0.796392	0.182379
829137	cg26512469	13	MCF2L	Body	S_Shore		42	0.0443266	0.0443266	1.42707	1.42707	Apple up vs Pear	0.23312	4.81749	0.223772	0.69675	1	0.100837	0.0871182	0.811718	0.624694	0.618108	0.809557	0.805737	0.908523	0.847153	0.803199	0.804023	0.628474	0.816329	0.886201	0.669837	0.725362	0.663927
820000	cg26202142	17					41	0.0443502	0.0443502	1.711	1.711	Apple up vs Pear	0.201196	4.81626	0.166682	0.519122	1	0.391391	0.067185	0.410103	0.402059	0.50525	0.120045	0.469129	0.743373	0.372398	0.431532	0.623427	0.423436	0.128561	0.430958	0.794056	0.393485	0.116159
656518	cg20300784	2			S_Shelf		1	0.0443615	0.0443615	0.663829	-1.50641	Apple down vs Pear	-0.243024	4.81568	0.243191	0.757497	1	0.442331	0.734204	0.762519	0.457787	0.473051	0.761834	0.768138	0.822385	0.47325	0.783288	0.0503735	0.768986	0.0463133	0.472382	0.457585	0.807408	0.777518
290392	cg08570077	7					22	0.0445495	0.0445495	0.638812	-1.5654	Apple down vs Pear	-0.270085	4.80595	0.300367	0.937484	1	0.783126	0.765972	0.140997	0.79654	0.138781	0.769338	0.810313	0.841505	0.504708	0.756451	0.155833	0.80003	0.492492	0.80071	0.148834	0.81678	0.488836
857424	cg27481428	7			Island		0	0.0447339	0.0447339	0.668783	-1.49525	Apple down vs Pear	-0.218887	4.79645	0.197282	0.616963	1	0.419341	0.650419	0.642186	0.0397503	0.429053	0.722845	0.634014	0.662863	0.65231	0.418277	0.401595	0.672627	0.0535104	0.391795	0.728348	0.770815	0.755928
450310	cg13574174	17					40	0.0451791	0.0451791	1.52131	1.52131	Apple up vs Pear	0.273476	4.77371	0.307956	0.967663	1	0.913919	0.553234	0.888764	0.535784	0.890842	0.586807	0.0640069	0.576913	0.914019	0.895618	0.579821	0.0515897	0.895337	0.890334	0.913293	0.616498	0.886118
189170	cg05522042	16	KIAA0513	3'UTR		Unclassified_Cell_type_specific	1	0.0455517	0.0455517	0.573024	-1.74513	Apple down vs Pear	-0.281375	4.75488	0.326001	1.02842	1	0.447802	0.797271	0.0350053	0.450314	0.0420043	0.68482	0.778434	0.774018	0.476158	0.0350587	0.0355792	0.445572	0.762351	0.469944	0.695763	0.732747	0.726312
[truncated: 26 more rows]
